# Supplementary material for: Predictive Structure and Topology of Peroxisomal ATP-Binding Cassette (ABC) Transporters
Source: Int J Mol Sci. 2017 Jul 22;18(7):1593. doi: 10.3390/ijms18071593 (PMC5536080; doi:10.3390/ijms18071593)
Supplement: Supplementary file 1 [file ijms-18-01593-s001.pdb]

TITLE     SWISS-MODEL SERVER (https://swissmodel.expasy.org)
TITLE    2 Template Alignment: 4ayx.1
EXPDTA    THEORETICAL MODEL (SWISS-MODEL SERVER)
AUTHOR    SWISS-MODEL SERVER (SEE REFERENCE IN JRNL Records)
REVDAT   1   14-JUN-17 1MOD    1       18:39
JRNL        AUTH   M.BIASINI,S.BIENERT,A.WATERHOUSE,K.ARNOLD,G.STUDER,
JRNL        AUTH 2 T.SCHMIDT,F.KIEFER,T.GALLO CASSARINO,M.BERTONI,L.BORDOLI,
JRNL        AUTH 3 T.SCHWEDE
JRNL        TITL   SWISS-MODEL: MODELLING PROTEIN TERTIARY AND QUATERNARY
JRNL        TITL 2 STRUCTURE USING EVOLUTIONARY INFORMATION
JRNL        REF    NUCLEIC.ACIDS.RES                          2014
JRNL        REFN                   ISSN 0305-1048
JRNL        PMID   24782522
JRNL        DOI    10.1093/nar/gku340
REMARK   1
REMARK   1 REFERENCE 1
REMARK   1   AUTH   K.ARNOLD,L.BORDOLI,J.KOPP,T.SCHWEDE
REMARK   1  TITL   SWISS-MODEL WORKSPACE: A WEB-BASED ENVIRONMENT FOR PROTEIN
REMARK   1  TITL 2 STRUCTURE HOMOLOGY MODELLING
REMARK   1  REF    BIOINFORMATICS                V.  22   195 2006
REMARK   1  REFN                   ISSN 1367-4803
REMARK   1  PMID   16301204
REMARK   1  DOI    10.1093/bioinformatics/bti770
REMARK   1
REMARK   1 REFERENCE 2
REMARK   1  AUTH   P.BENKERT,M.BIASINI,T.SCHWEDE 
REMARK   1  TITL   TOWARD THE ESTIMATION OF THE ABSOLUTE QUALITY OF INDIVIDUAL
REMARK   1  TITL 2 PROTEIN STRUCTURE MODELS
REMARK   1  REF    BIOINFORMATICS                V.   3 343   2011
REMARK   1  REFN                   ISSN 1367-4803
REMARK   1  PMID   21134891
REMARK   1  DOI    10.1093/bioinformatics/btq662
REMARK   1
REMARK   1 REFERENCE 3
REMARK   1  AUTH   F.KIEFER,K.ARNOLD,M.KUENZLI,L.BORDOLI,T.SCHWEDE
REMARK   1  TITL   THE SWISS-MODEL REPOSITORY AND ASSOCIATED RESOURCES
REMARK   1  REF    NUCLEIC.ACIDS.RES             V.  37 D387  2009
REMARK   1  REFN                   ISSN 0305-1048
REMARK   1  PMID   18931379
REMARK   1  DOI    10.1093/nar/gkn750
REMARK   1
REMARK   1
REMARK   1 REFERENCE 4
REMARK   1  AUTH   T.SCHWEDE,J.KOPP,N.GUEX,M.C.PEITSCH                          
REMARK   1  TITL   SWISS_MODEL: AN AUTOMATED PROTEIN HOMOLOGY-MODELING          
REMARK   1  TITL 2 SERVER                                                       
REMARK   1  REF    NUCLEIC.ACIDS.RES.            V.  31 3381  2003              
REMARK   1  REFN                   ISSN 0305-1048
REMARK   1  PMID   12824332
REMARK   1  DOI    10.1093/nar/gkg520
REMARK   1
REMARK   1 REFERENCE 5
REMARK   1  AUTH   M.C.PEITSCH,N.GUEX                                           
REMARK   1  TITL   SWISS-MODEL AND THE SWISS-PDBVIEWER: AN ENVIRONMENT
REMARK   1  TITL 2 FOR COMPARATIVE PROTEIN MODELLING                            
REMARK   1  REF    ELECTROPHORESIS               V.  18 2714  1997   
REMARK   1  REFN                   ISSN
REMARK   1  DOI    10.1002/elps.1150181505
REMARK   1  PMID   9504803 
REMARK   1
REMARK   1 REFERENCE 6
REMARK   1  AUTH   M.C.PEITSCH
REMARK   1  TITL   PROTEIN MODELING BY E-MAIL
REMARK   1  REF    BIO/TECHNOLOGY                V.  13 658   1995
REMARK   1  REFN                   ISSN 1087-0156
REMARK   1  DOI    10.1038/nbt0795-658
REMARK   1
REMARK   1 DISCLAIMER
REMARK   1 The SWISS-MODEL SERVER produces theoretical models for proteins.
REMARK   1 The results of any theoretical modelling procedure is
REMARK   1 NON-EXPERIMENTAL and MUST be considered with care. These models may
REMARK   1 contain significant errors. This is especially true for automated
REMARK   1 modeling since there is no human intervention during model
REMARK   1 building. Please read the header section and the logfile carefully
REMARK   1 to know what templates and alignments were used during the model
REMARK   1 building process. All information by the SWISS-MODEL SERVER is
REMARK   1 provided "AS-IS", without any warranty, expressed or implied.
REMARK   2
REMARK   2 COPYRIGHT NOTICE
REMARK   2 This SWISS-MODEL protein model is copyright. It is produced by the
REMARK   2 SWISS-MODEL server, developed by the Computational Structural
REMARK   2 Biology Group at the SIB Swiss Institute of Bioinformatics at the
REMARK   2 Biozentrum, University of Basel (https://swissmodel.expasy.org). This
REMARK   2 model is licensed under the CC BY-SA 4.0 Creative Commons
REMARK   2 Attribution-ShareAlike 4.0 International License
REMARK   2 (https://creativecommons.org/licenses/by-sa/4.0/legalcode), i.e. you
REMARK   2 can copy and redistribute the model in any medium or format,
REMARK   2 transform and build upon the model for any purpose, even
REMARK   2 commercially, under the following terms:
REMARK   2 Attribution - You must give appropriate credit, provide a link to
REMARK   2 the license, and indicate if changes were made. You may do so in any
REMARK   2 reasonable manner, but not in any way that suggests the licensor
REMARK   2 endorses you or your use. When you publish, patent or distribute
REMARK   2 results that were fully or partially based on the model, please cite
REMARK   2 the corresponding papers mentioned under JRNL.
REMARK   2 ShareAlike - If you remix, transform, or build upon the material,
REMARK   2 you must distribute your contributions under the same license as the
REMARK   2 original.
REMARK   2 No additional restrictions - you may not apply legal terms or
REMARK   2 technological measures that legally restrict others from doing
REMARK   2 anything the license permits.
REMARK   2 Find a human-readable summary of (and not a substitute for) the
REMARK   2 CC BY-SA 4.0 license at this link:
REMARK   2 https://creativecommons.org/licenses/by-sa/4.0/
REMARK   3 
REMARK   3 MODEL INFORMATION
REMARK   3  ENGIN   PROMOD3
REMARK   3  VERSN   1.0.2
REMARK   3  OSTAT   homo-dimer
REMARK   3  OSRSN   PREDICTION
REMARK   3  GMQE    0.39
REMARK   3  QMN4    -7.94
REMARK   3  MODT    FALSE
REMARK   3 
REMARK   3 TEMPLATE 1
REMARK   3  PDBID   4ayx
REMARK   3  CHAIN   A
REMARK   3  MMCIF   A
REMARK   3  PDBV    2017-06-02
REMARK   3  SMTLE   4ayx.1.A
REMARK   3  SMTLV   2017-06-07
REMARK   3  MTHD    X-RAY DIFFRACTION 2.90 A
REMARK   3  FOUND   USER_ALIGNMENT
REMARK   3  GMQE    0.39
REMARK   3  SIM     0.29
REMARK   3  SID     17.71
REMARK   3  OSTAT   homo-dimer
REMARK   3  LIGND   GLY
REMARK   3  LIGND 2 GLY
REMARK   3  LIGND 3 MG
REMARK   3  LIGND 4 MG
REMARK   3  LIGND 5 ACP
REMARK   3  LIGND 6 ACP
REMARK   3  LIGND 7 LMT
REMARK   3  LIGND 8 LMT
REMARK   3  LIGND 9 LMT
REMARK   3  LIGND 10 LMT
REMARK   3  LIGND 11 CDL
REMARK   3  LIGND 12 CDL
REMARK   3  LIGND 13 CDL
REMARK   3  LIGND 14 CDL
ATOM      1  N   ASN A   4     -53.379  55.989 -15.142  1.00  0.32           N  
ATOM      2  CA  ASN A   4     -54.547  55.033 -15.208  1.00  0.32           C  
ATOM      3  C   ASN A   4     -54.422  53.909 -14.188  1.00  0.32           C  
ATOM      4  O   ASN A   4     -54.621  54.197 -13.016  1.00  0.32           O  
ATOM      5  CB  ASN A   4     -54.839  54.547 -16.665  1.00  0.32           C  
ATOM      6  CG  ASN A   4     -55.182  55.752 -17.550  1.00  0.32           C  
ATOM      7  OD1 ASN A   4     -54.775  56.864 -17.213  1.00  0.32           O  
ATOM      8  ND2 ASN A   4     -55.906  55.547 -18.665  1.00  0.32           N  
ATOM      9  N   ARG A   5     -54.063  52.649 -14.571  1.00  0.46           N  
ATOM     10  CA  ARG A   5     -54.140  51.433 -13.744  1.00  0.46           C  
ATOM     11  C   ARG A   5     -53.849  51.551 -12.251  1.00  0.46           C  
ATOM     12  O   ARG A   5     -54.666  51.125 -11.444  1.00  0.46           O  
ATOM     13  CB  ARG A   5     -53.240  50.300 -14.311  1.00  0.46           C  
ATOM     14  CG  ARG A   5     -53.752  49.670 -15.623  1.00  0.46           C  
ATOM     15  CD  ARG A   5     -52.894  48.481 -16.079  1.00  0.46           C  
ATOM     16  NE  ARG A   5     -53.557  47.892 -17.288  1.00  0.46           N  
ATOM     17  CZ  ARG A   5     -52.923  47.327 -18.325  1.00  0.46           C  
ATOM     18  NH1 ARG A   5     -53.641  46.693 -19.248  1.00  0.46           N  
ATOM     19  NH2 ARG A   5     -51.600  47.335 -18.438  1.00  0.46           N  
ATOM     20  N   VAL A   6     -52.722  52.195 -11.870  1.00  0.42           N  
ATOM     21  CA  VAL A   6     -52.251  52.425 -10.501  1.00  0.42           C  
ATOM     22  C   VAL A   6     -53.299  53.022  -9.560  1.00  0.42           C  
ATOM     23  O   VAL A   6     -53.341  52.728  -8.369  1.00  0.42           O  
ATOM     24  CB  VAL A   6     -50.973  53.276 -10.524  1.00  0.42           C  
ATOM     25  CG1 VAL A   6     -50.497  53.665  -9.107  1.00  0.42           C  
ATOM     26  CG2 VAL A   6     -49.871  52.458 -11.228  1.00  0.42           C  
ATOM     27  N   PHE A   7     -54.210  53.856 -10.083  1.00  0.28           N  
ATOM     28  CA  PHE A   7     -55.192  54.545  -9.278  1.00  0.28           C  
ATOM     29  C   PHE A   7     -56.540  53.832  -9.238  1.00  0.28           C  
ATOM     30  O   PHE A   7     -57.406  54.207  -8.463  1.00  0.28           O  
ATOM     31  CB  PHE A   7     -55.415  55.960  -9.880  1.00  0.28           C  
ATOM     32  CG  PHE A   7     -54.153  56.783  -9.796  1.00  0.28           C  
ATOM     33  CD1 PHE A   7     -53.201  56.774 -10.833  1.00  0.28           C  
ATOM     34  CD2 PHE A   7     -53.907  57.573  -8.662  1.00  0.28           C  
ATOM     35  CE1 PHE A   7     -52.018  57.518 -10.727  1.00  0.28           C  
ATOM     36  CE2 PHE A   7     -52.727  58.320  -8.551  1.00  0.28           C  
ATOM     37  CZ  PHE A   7     -51.780  58.288  -9.582  1.00  0.28           C  
ATOM     38  N   LEU A   8     -56.765  52.773 -10.040  1.00  0.21           N  
ATOM     39  CA  LEU A   8     -58.097  52.233 -10.286  1.00  0.21           C  
ATOM     40  C   LEU A   8     -58.683  51.348  -9.188  1.00  0.21           C  
ATOM     41  O   LEU A   8     -58.079  51.072  -8.153  1.00  0.21           O  
ATOM     42  CB  LEU A   8     -58.164  51.486 -11.645  1.00  0.21           C  
ATOM     43  CG  LEU A   8     -57.903  52.375 -12.879  1.00  0.21           C  
ATOM     44  CD1 LEU A   8     -57.966  51.524 -14.156  1.00  0.21           C  
ATOM     45  CD2 LEU A   8     -58.894  53.543 -13.004  1.00  0.21           C  
ATOM     46  N   GLN A   9     -59.942  50.892  -9.408  1.00  0.28           N  
ATOM     47  CA  GLN A   9     -60.793  50.092  -8.532  1.00  0.28           C  
ATOM     48  C   GLN A   9     -60.256  48.749  -8.028  1.00  0.28           C  
ATOM     49  O   GLN A   9     -60.973  48.019  -7.353  1.00  0.28           O  
ATOM     50  CB  GLN A   9     -62.143  49.791  -9.241  1.00  0.28           C  
ATOM     51  CG  GLN A   9     -62.989  51.032  -9.613  1.00  0.28           C  
ATOM     52  CD  GLN A   9     -64.280  50.593 -10.311  1.00  0.28           C  
ATOM     53  OE1 GLN A   9     -64.292  49.639 -11.086  1.00  0.28           O  
ATOM     54  NE2 GLN A   9     -65.398  51.308 -10.051  1.00  0.28           N  
ATOM     55  N   ARG A  10     -58.990  48.386  -8.307  1.00  0.27           N  
ATOM     56  CA  ARG A  10     -58.352  47.231  -7.700  1.00  0.27           C  
ATOM     57  C   ARG A  10     -57.201  47.631  -6.792  1.00  0.27           C  
ATOM     58  O   ARG A  10     -56.611  46.773  -6.150  1.00  0.27           O  
ATOM     59  CB  ARG A  10     -57.841  46.229  -8.766  1.00  0.27           C  
ATOM     60  CG  ARG A  10     -58.987  45.575  -9.568  1.00  0.27           C  
ATOM     61  CD  ARG A  10     -58.557  44.403 -10.463  1.00  0.27           C  
ATOM     62  NE  ARG A  10     -58.106  43.273  -9.588  1.00  0.27           N  
ATOM     63  CZ  ARG A  10     -58.875  42.334  -9.029  1.00  0.27           C  
ATOM     64  NH1 ARG A  10     -58.291  41.380  -8.311  1.00  0.27           N  
ATOM     65  NH2 ARG A  10     -60.191  42.318  -9.147  1.00  0.27           N  
ATOM     66  N   LEU A  11     -56.875  48.938  -6.683  1.00  0.38           N  
ATOM     67  CA  LEU A  11     -55.695  49.389  -5.965  1.00  0.38           C  
ATOM     68  C   LEU A  11     -56.047  50.509  -4.999  1.00  0.38           C  
ATOM     69  O   LEU A  11     -56.749  50.293  -4.014  1.00  0.38           O  
ATOM     70  CB  LEU A  11     -54.632  49.851  -6.986  1.00  0.38           C  
ATOM     71  CG  LEU A  11     -54.213  48.744  -7.974  1.00  0.38           C  
ATOM     72  CD1 LEU A  11     -53.236  49.314  -8.994  1.00  0.38           C  
ATOM     73  CD2 LEU A  11     -53.550  47.553  -7.286  1.00  0.38           C  
ATOM     74  N   LEU A  12     -55.613  51.767  -5.249  1.00  0.46           N  
ATOM     75  CA  LEU A  12     -55.863  52.889  -4.352  1.00  0.46           C  
ATOM     76  C   LEU A  12     -57.346  53.150  -4.116  1.00  0.46           C  
ATOM     77  O   LEU A  12     -57.785  53.424  -2.998  1.00  0.46           O  
ATOM     78  CB  LEU A  12     -55.216  54.191  -4.887  1.00  0.46           C  
ATOM     79  CG  LEU A  12     -53.675  54.160  -4.977  1.00  0.46           C  
ATOM     80  CD1 LEU A  12     -53.168  55.447  -5.642  1.00  0.46           C  
ATOM     81  CD2 LEU A  12     -53.000  53.997  -3.606  1.00  0.46           C  
ATOM     82  N   TRP A  13     -58.170  53.036  -5.178  1.00  0.26           N  
ATOM     83  CA  TRP A  13     -59.611  53.111  -5.058  1.00  0.26           C  
ATOM     84  C   TRP A  13     -60.246  51.964  -4.277  1.00  0.26           C  
ATOM     85  O   TRP A  13     -61.129  52.198  -3.456  1.00  0.26           O  
ATOM     86  CB  TRP A  13     -60.304  53.362  -6.412  1.00  0.26           C  
ATOM     87  CG  TRP A  13     -59.977  54.703  -7.064  1.00  0.26           C  
ATOM     88  CD1 TRP A  13     -59.234  55.763  -6.606  1.00  0.26           C  
ATOM     89  CD2 TRP A  13     -60.429  55.069  -8.378  1.00  0.26           C  
ATOM     90  NE1 TRP A  13     -59.209  56.771  -7.547  1.00  0.26           N  
ATOM     91  CE2 TRP A  13     -59.921  56.359  -8.648  1.00  0.26           C  
ATOM     92  CE3 TRP A  13     -61.207  54.395  -9.312  1.00  0.26           C  
ATOM     93  CZ2 TRP A  13     -60.179  56.985  -9.860  1.00  0.26           C  
ATOM     94  CZ3 TRP A  13     -61.462  55.023 -10.539  1.00  0.26           C  
ATOM     95  CH2 TRP A  13     -60.952  56.301 -10.812  1.00  0.26           C  
ATOM     96  N   LEU A  14     -59.765  50.715  -4.461  1.00  0.42           N  
ATOM     97  CA  LEU A  14     -60.209  49.533  -3.729  1.00  0.42           C  
ATOM     98  C   LEU A  14     -59.968  49.632  -2.236  1.00  0.42           C  
ATOM     99  O   LEU A  14     -60.744  49.149  -1.418  1.00  0.42           O  
ATOM    100  CB  LEU A  14     -59.458  48.280  -4.241  1.00  0.42           C  
ATOM    101  CG  LEU A  14     -59.913  46.927  -3.649  1.00  0.42           C  
ATOM    102  CD1 LEU A  14     -61.333  46.557  -4.092  1.00  0.42           C  
ATOM    103  CD2 LEU A  14     -58.947  45.801  -4.039  1.00  0.42           C  
ATOM    104  N   LEU A  15     -58.851  50.260  -1.836  1.00  0.54           N  
ATOM    105  CA  LEU A  15     -58.542  50.436  -0.440  1.00  0.54           C  
ATOM    106  C   LEU A  15     -59.293  51.559   0.257  1.00  0.54           C  
ATOM    107  O   LEU A  15     -59.389  51.515   1.483  1.00  0.54           O  
ATOM    108  CB  LEU A  15     -57.031  50.675  -0.254  1.00  0.54           C  
ATOM    109  CG  LEU A  15     -56.151  49.485  -0.682  1.00  0.54           C  
ATOM    110  CD1 LEU A  15     -54.680  49.898  -0.634  1.00  0.54           C  
ATOM    111  CD2 LEU A  15     -56.361  48.234   0.186  1.00  0.54           C  
ATOM    112  N   ARG A  16     -59.852  52.581  -0.445  1.00  0.53           N  
ATOM    113  CA  ARG A  16     -60.435  53.744   0.231  1.00  0.53           C  
ATOM    114  C   ARG A  16     -61.741  54.346  -0.304  1.00  0.53           C  
ATOM    115  O   ARG A  16     -62.306  55.201   0.378  1.00  0.53           O  
ATOM    116  CB  ARG A  16     -59.419  54.929   0.192  1.00  0.53           C  
ATOM    117  CG  ARG A  16     -58.112  54.819   1.007  1.00  0.53           C  
ATOM    118  CD  ARG A  16     -58.238  54.900   2.529  1.00  0.53           C  
ATOM    119  NE  ARG A  16     -58.828  53.617   2.963  1.00  0.53           N  
ATOM    120  CZ  ARG A  16     -59.135  53.295   4.215  1.00  0.53           C  
ATOM    121  NH1 ARG A  16     -59.375  52.017   4.499  1.00  0.53           N  
ATOM    122  NH2 ARG A  16     -59.154  54.218   5.157  1.00  0.53           N  
ATOM    123  N   LEU A  17     -62.257  53.992  -1.499  1.00  0.47           N  
ATOM    124  CA  LEU A  17     -63.326  54.773  -2.128  1.00  0.47           C  
ATOM    125  C   LEU A  17     -64.686  54.084  -2.069  1.00  0.47           C  
ATOM    126  O   LEU A  17     -64.986  53.291  -1.189  1.00  0.47           O  
ATOM    127  CB  LEU A  17     -62.947  55.235  -3.566  1.00  0.47           C  
ATOM    128  CG  LEU A  17     -62.035  56.478  -3.596  1.00  0.47           C  
ATOM    129  CD1 LEU A  17     -60.650  56.161  -3.037  1.00  0.47           C  
ATOM    130  CD2 LEU A  17     -61.967  57.064  -5.012  1.00  0.47           C  
ATOM    131  N   LEU A  18     -65.603  54.421  -2.994  1.00  0.45           N  
ATOM    132  CA  LEU A  18     -67.028  54.159  -2.917  1.00  0.45           C  
ATOM    133  C   LEU A  18     -67.428  52.682  -2.975  1.00  0.45           C  
ATOM    134  O   LEU A  18     -68.541  52.300  -2.611  1.00  0.45           O  
ATOM    135  CB  LEU A  18     -67.686  54.965  -4.063  1.00  0.45           C  
ATOM    136  CG  LEU A  18     -69.223  55.072  -4.031  1.00  0.45           C  
ATOM    137  CD1 LEU A  18     -69.735  55.747  -2.750  1.00  0.45           C  
ATOM    138  CD2 LEU A  18     -69.723  55.852  -5.255  1.00  0.45           C  
ATOM    139  N   PHE A  19     -66.489  51.813  -3.383  1.00  0.40           N  
ATOM    140  CA  PHE A  19     -66.678  50.386  -3.483  1.00  0.40           C  
ATOM    141  C   PHE A  19     -65.483  49.692  -2.847  1.00  0.40           C  
ATOM    142  O   PHE A  19     -64.372  50.188  -3.036  1.00  0.40           O  
ATOM    143  CB  PHE A  19     -66.726  49.950  -4.969  1.00  0.40           C  
ATOM    144  CG  PHE A  19     -67.924  50.560  -5.635  1.00  0.40           C  
ATOM    145  CD1 PHE A  19     -67.808  51.741  -6.388  1.00  0.40           C  
ATOM    146  CD2 PHE A  19     -69.187  49.973  -5.473  1.00  0.40           C  
ATOM    147  CE1 PHE A  19     -68.942  52.337  -6.954  1.00  0.40           C  
ATOM    148  CE2 PHE A  19     -70.322  50.561  -6.045  1.00  0.40           C  
ATOM    149  CZ  PHE A  19     -70.200  51.747  -6.780  1.00  0.40           C  
ATOM    150  N   PRO A  20     -65.602  48.564  -2.135  1.00  0.53           N  
ATOM    151  CA  PRO A  20     -66.835  47.855  -1.783  1.00  0.53           C  
ATOM    152  C   PRO A  20     -67.664  48.541  -0.706  1.00  0.53           C  
ATOM    153  O   PRO A  20     -67.263  49.564  -0.161  1.00  0.53           O  
ATOM    154  CB  PRO A  20     -66.330  46.490  -1.268  1.00  0.53           C  
ATOM    155  CG  PRO A  20     -64.944  46.331  -1.897  1.00  0.53           C  
ATOM    156  CD  PRO A  20     -64.420  47.758  -1.841  1.00  0.53           C  
ATOM    157  N   ARG A  21     -68.827  47.963  -0.337  1.00  0.49           N  
ATOM    158  CA  ARG A  21     -69.766  48.596   0.582  1.00  0.49           C  
ATOM    159  C   ARG A  21     -69.502  48.281   2.053  1.00  0.49           C  
ATOM    160  O   ARG A  21     -70.300  48.621   2.916  1.00  0.49           O  
ATOM    161  CB  ARG A  21     -71.238  48.204   0.282  1.00  0.49           C  
ATOM    162  CG  ARG A  21     -71.820  48.767  -1.030  1.00  0.49           C  
ATOM    163  CD  ARG A  21     -73.322  48.473  -1.135  1.00  0.49           C  
ATOM    164  NE  ARG A  21     -73.821  49.077  -2.412  1.00  0.49           N  
ATOM    165  CZ  ARG A  21     -75.056  48.873  -2.894  1.00  0.49           C  
ATOM    166  NH1 ARG A  21     -75.418  49.442  -4.042  1.00  0.49           N  
ATOM    167  NH2 ARG A  21     -75.937  48.113  -2.251  1.00  0.49           N  
ATOM    168  N   VAL A  22     -68.360  47.652   2.382  1.00  0.52           N  
ATOM    169  CA  VAL A  22     -67.907  47.479   3.759  1.00  0.52           C  
ATOM    170  C   VAL A  22     -66.593  48.204   3.983  1.00  0.52           C  
ATOM    171  O   VAL A  22     -65.916  48.042   4.996  1.00  0.52           O  
ATOM    172  CB  VAL A  22     -67.730  46.010   4.120  1.00  0.52           C  
ATOM    173  CG1 VAL A  22     -69.117  45.342   4.122  1.00  0.52           C  
ATOM    174  CG2 VAL A  22     -66.776  45.298   3.138  1.00  0.52           C  
ATOM    175  N   LEU A  23     -66.184  49.041   3.016  1.00  0.52           N  
ATOM    176  CA  LEU A  23     -64.941  49.771   3.071  1.00  0.52           C  
ATOM    177  C   LEU A  23     -65.101  51.074   3.836  1.00  0.52           C  
ATOM    178  O   LEU A  23     -66.196  51.639   3.881  1.00  0.52           O  
ATOM    179  CB  LEU A  23     -64.510  50.057   1.622  1.00  0.52           C  
ATOM    180  CG  LEU A  23     -63.050  50.467   1.403  1.00  0.52           C  
ATOM    181  CD1 LEU A  23     -62.090  49.330   1.778  1.00  0.52           C  
ATOM    182  CD2 LEU A  23     -62.899  50.836  -0.071  1.00  0.52           C  
ATOM    183  N   CYS A  24     -64.003  51.620   4.418  1.00  0.65           N  
ATOM    184  CA  CYS A  24     -63.982  52.803   5.283  1.00  0.65           C  
ATOM    185  C   CYS A  24     -64.224  54.129   4.562  1.00  0.65           C  
ATOM    186  O   CYS A  24     -63.794  55.203   4.979  1.00  0.65           O  
ATOM    187  CB  CYS A  24     -62.626  52.934   6.031  1.00  0.65           C  
ATOM    188  SG  CYS A  24     -62.108  51.383   6.836  1.00  0.65           S  
ATOM    189  N   ARG A  25     -64.964  54.073   3.452  1.00  0.54           N  
ATOM    190  CA  ARG A  25     -65.423  55.173   2.650  1.00  0.54           C  
ATOM    191  C   ARG A  25     -66.370  56.082   3.407  1.00  0.54           C  
ATOM    192  O   ARG A  25     -66.284  57.292   3.291  1.00  0.54           O  
ATOM    193  CB  ARG A  25     -66.081  54.595   1.383  1.00  0.54           C  
ATOM    194  CG  ARG A  25     -67.441  53.919   1.608  1.00  0.54           C  
ATOM    195  CD  ARG A  25     -67.708  52.719   0.703  1.00  0.54           C  
ATOM    196  NE  ARG A  25     -69.154  52.385   0.854  1.00  0.54           N  
ATOM    197  CZ  ARG A  25     -69.715  51.956   1.989  1.00  0.54           C  
ATOM    198  NH1 ARG A  25     -69.030  51.528   3.049  1.00  0.54           N  
ATOM    199  NH2 ARG A  25     -71.035  52.028   2.126  1.00  0.54           N  
ATOM    200  N   GLU A  26     -67.272  55.532   4.249  1.00  0.61           N  
ATOM    201  CA  GLU A  26     -68.210  56.274   5.071  1.00  0.61           C  
ATOM    202  C   GLU A  26     -67.478  57.144   6.071  1.00  0.61           C  
ATOM    203  O   GLU A  26     -67.738  58.337   6.205  1.00  0.61           O  
ATOM    204  CB  GLU A  26     -69.115  55.267   5.813  1.00  0.61           C  
ATOM    205  CG  GLU A  26     -70.013  54.444   4.855  1.00  0.61           C  
ATOM    206  CD  GLU A  26     -70.503  53.132   5.467  1.00  0.61           C  
ATOM    207  OE1 GLU A  26     -70.150  52.824   6.624  1.00  0.61           O  
ATOM    208  OE2 GLU A  26     -71.161  52.373   4.702  1.00  0.61           O  
ATOM    209  N   THR A  27     -66.449  56.563   6.716  1.00  0.68           N  
ATOM    210  CA  THR A  27     -65.505  57.227   7.600  1.00  0.68           C  
ATOM    211  C   THR A  27     -64.771  58.361   6.906  1.00  0.68           C  
ATOM    212  O   THR A  27     -64.680  59.476   7.422  1.00  0.68           O  
ATOM    213  CB  THR A  27     -64.475  56.221   8.115  1.00  0.68           C  
ATOM    214  OG1 THR A  27     -65.136  55.070   8.610  1.00  0.68           O  
ATOM    215  CG2 THR A  27     -63.643  56.776   9.268  1.00  0.68           C  
ATOM    216  N   GLY A  28     -64.286  58.117   5.670  1.00  0.73           N  
ATOM    217  CA  GLY A  28     -63.578  59.102   4.862  1.00  0.73           C  
ATOM    218  C   GLY A  28     -64.424  60.184   4.246  1.00  0.73           C  
ATOM    219  O   GLY A  28     -64.035  61.343   4.248  1.00  0.73           O  
ATOM    220  N   LEU A  29     -65.608  59.859   3.703  1.00  0.67           N  
ATOM    221  CA  LEU A  29     -66.566  60.806   3.152  1.00  0.67           C  
ATOM    222  C   LEU A  29     -67.152  61.717   4.213  1.00  0.67           C  
ATOM    223  O   LEU A  29     -67.284  62.923   4.019  1.00  0.67           O  
ATOM    224  CB  LEU A  29     -67.719  60.083   2.414  1.00  0.67           C  
ATOM    225  CG  LEU A  29     -67.295  59.380   1.106  1.00  0.67           C  
ATOM    226  CD1 LEU A  29     -68.405  58.431   0.631  1.00  0.67           C  
ATOM    227  CD2 LEU A  29     -66.942  60.381  -0.005  1.00  0.67           C  
ATOM    228  N   LEU A  30     -67.481  61.172   5.400  1.00  0.71           N  
ATOM    229  CA  LEU A  30     -67.904  61.949   6.549  1.00  0.71           C  
ATOM    230  C   LEU A  30     -66.797  62.878   7.046  1.00  0.71           C  
ATOM    231  O   LEU A  30     -67.026  64.024   7.432  1.00  0.71           O  
ATOM    232  CB  LEU A  30     -68.394  60.979   7.650  1.00  0.71           C  
ATOM    233  CG  LEU A  30     -69.084  61.602   8.878  1.00  0.71           C  
ATOM    234  CD1 LEU A  30     -70.337  62.412   8.523  1.00  0.71           C  
ATOM    235  CD2 LEU A  30     -69.443  60.499   9.885  1.00  0.71           C  
ATOM    236  N   ALA A  31     -65.527  62.428   7.031  1.00  0.80           N  
ATOM    237  CA  ALA A  31     -64.380  63.291   7.237  1.00  0.80           C  
ATOM    238  C   ALA A  31     -64.198  64.361   6.150  1.00  0.80           C  
ATOM    239  O   ALA A  31     -64.005  65.536   6.448  1.00  0.80           O  
ATOM    240  CB  ALA A  31     -63.135  62.414   7.415  1.00  0.80           C  
ATOM    241  N   LEU A  32     -64.349  63.995   4.863  1.00  0.76           N  
ATOM    242  CA  LEU A  32     -64.273  64.878   3.709  1.00  0.76           C  
ATOM    243  C   LEU A  32     -65.340  65.961   3.685  1.00  0.76           C  
ATOM    244  O   LEU A  32     -65.085  67.100   3.291  1.00  0.76           O  
ATOM    245  CB  LEU A  32     -64.330  64.045   2.403  1.00  0.76           C  
ATOM    246  CG  LEU A  32     -64.027  64.806   1.096  1.00  0.76           C  
ATOM    247  CD1 LEU A  32     -62.622  65.419   1.114  1.00  0.76           C  
ATOM    248  CD2 LEU A  32     -64.158  63.862  -0.108  1.00  0.76           C  
ATOM    249  N   HIS A  33     -66.566  65.629   4.133  1.00  0.74           N  
ATOM    250  CA  HIS A  33     -67.650  66.563   4.395  1.00  0.74           C  
ATOM    251  C   HIS A  33     -67.281  67.588   5.461  1.00  0.74           C  
ATOM    252  O   HIS A  33     -67.420  68.796   5.276  1.00  0.74           O  
ATOM    253  CB  HIS A  33     -68.895  65.771   4.866  1.00  0.74           C  
ATOM    254  CG  HIS A  33     -70.084  66.616   5.190  1.00  0.74           C  
ATOM    255  ND1 HIS A  33     -70.695  67.325   4.179  1.00  0.74           N  
ATOM    256  CD2 HIS A  33     -70.707  66.845   6.375  1.00  0.74           C  
ATOM    257  CE1 HIS A  33     -71.683  67.971   4.763  1.00  0.74           C  
ATOM    258  NE2 HIS A  33     -71.736  67.717   6.094  1.00  0.74           N  
ATOM    259  N   SER A  34     -66.703  67.127   6.591  1.00  0.83           N  
ATOM    260  CA  SER A  34     -66.159  68.002   7.624  1.00  0.83           C  
ATOM    261  C   SER A  34     -65.015  68.874   7.129  1.00  0.83           C  
ATOM    262  O   SER A  34     -64.975  70.069   7.401  1.00  0.83           O  
ATOM    263  CB  SER A  34     -65.670  67.219   8.872  1.00  0.83           C  
ATOM    264  OG  SER A  34     -66.767  66.646   9.591  1.00  0.83           O  
ATOM    265  N   ALA A  35     -64.077  68.316   6.343  1.00  0.83           N  
ATOM    266  CA  ALA A  35     -62.996  69.032   5.693  1.00  0.83           C  
ATOM    267  C   ALA A  35     -63.460  70.105   4.701  1.00  0.83           C  
ATOM    268  O   ALA A  35     -62.951  71.228   4.668  1.00  0.83           O  
ATOM    269  CB  ALA A  35     -62.131  67.984   4.970  1.00  0.83           C  
ATOM    270  N   ALA A  36     -64.490  69.787   3.887  1.00  0.82           N  
ATOM    271  CA  ALA A  36     -65.148  70.715   2.991  1.00  0.82           C  
ATOM    272  C   ALA A  36     -65.828  71.873   3.711  1.00  0.82           C  
ATOM    273  O   ALA A  36     -65.689  73.027   3.307  1.00  0.82           O  
ATOM    274  CB  ALA A  36     -66.199  69.957   2.150  1.00  0.82           C  
ATOM    275  N   LEU A  37     -66.551  71.584   4.813  1.00  0.77           N  
ATOM    276  CA  LEU A  37     -67.173  72.587   5.659  1.00  0.77           C  
ATOM    277  C   LEU A  37     -66.166  73.516   6.325  1.00  0.77           C  
ATOM    278  O   LEU A  37     -66.307  74.737   6.275  1.00  0.77           O  
ATOM    279  CB  LEU A  37     -68.025  71.880   6.745  1.00  0.77           C  
ATOM    280  CG  LEU A  37     -68.799  72.808   7.708  1.00  0.77           C  
ATOM    281  CD1 LEU A  37     -69.820  73.688   6.971  1.00  0.77           C  
ATOM    282  CD2 LEU A  37     -69.502  71.980   8.794  1.00  0.77           C  
ATOM    283  N   VAL A  38     -65.088  72.955   6.915  1.00  0.79           N  
ATOM    284  CA  VAL A  38     -64.023  73.710   7.566  1.00  0.79           C  
ATOM    285  C   VAL A  38     -63.289  74.636   6.616  1.00  0.79           C  
ATOM    286  O   VAL A  38     -63.078  75.810   6.913  1.00  0.79           O  
ATOM    287  CB  VAL A  38     -63.036  72.756   8.245  1.00  0.79           C  
ATOM    288  CG1 VAL A  38     -61.727  73.456   8.667  1.00  0.79           C  
ATOM    289  CG2 VAL A  38     -63.732  72.160   9.481  1.00  0.79           C  
ATOM    290  N   SER A  39     -62.915  74.150   5.416  1.00  0.78           N  
ATOM    291  CA  SER A  39     -62.215  74.974   4.438  1.00  0.78           C  
ATOM    292  C   SER A  39     -63.041  76.149   3.944  1.00  0.78           C  
ATOM    293  O   SER A  39     -62.587  77.289   3.913  1.00  0.78           O  
ATOM    294  CB  SER A  39     -61.786  74.159   3.191  1.00  0.78           C  
ATOM    295  OG  SER A  39     -60.842  73.146   3.536  1.00  0.78           O  
ATOM    296  N   ARG A  40     -64.313  75.910   3.579  1.00  0.67           N  
ATOM    297  CA  ARG A  40     -65.191  76.938   3.050  1.00  0.67           C  
ATOM    298  C   ARG A  40     -65.632  77.997   4.055  1.00  0.67           C  
ATOM    299  O   ARG A  40     -65.694  79.187   3.741  1.00  0.67           O  
ATOM    300  CB  ARG A  40     -66.402  76.278   2.362  1.00  0.67           C  
ATOM    301  CG  ARG A  40     -65.974  75.582   1.056  1.00  0.67           C  
ATOM    302  CD  ARG A  40     -67.102  74.821   0.372  1.00  0.67           C  
ATOM    303  NE  ARG A  40     -66.568  74.425  -0.969  1.00  0.67           N  
ATOM    304  CZ  ARG A  40     -67.166  73.547  -1.783  1.00  0.67           C  
ATOM    305  NH1 ARG A  40     -66.704  73.394  -3.020  1.00  0.67           N  
ATOM    306  NH2 ARG A  40     -68.218  72.834  -1.384  1.00  0.67           N  
ATOM    307  N   THR A  41     -65.937  77.614   5.313  1.00  0.71           N  
ATOM    308  CA  THR A  41     -66.254  78.589   6.359  1.00  0.71           C  
ATOM    309  C   THR A  41     -65.072  79.474   6.712  1.00  0.71           C  
ATOM    310  O   THR A  41     -65.228  80.681   6.898  1.00  0.71           O  
ATOM    311  CB  THR A  41     -66.862  78.011   7.631  1.00  0.71           C  
ATOM    312  OG1 THR A  41     -66.018  77.057   8.252  1.00  0.71           O  
ATOM    313  CG2 THR A  41     -68.184  77.308   7.292  1.00  0.71           C  
ATOM    314  N   PHE A  42     -63.851  78.902   6.747  1.00  0.63           N  
ATOM    315  CA  PHE A  42     -62.602  79.617   6.939  1.00  0.63           C  
ATOM    316  C   PHE A  42     -62.307  80.652   5.848  1.00  0.63           C  
ATOM    317  O   PHE A  42     -61.908  81.778   6.128  1.00  0.63           O  
ATOM    318  CB  PHE A  42     -61.446  78.590   7.057  1.00  0.63           C  
ATOM    319  CG  PHE A  42     -60.163  79.240   7.492  1.00  0.63           C  
ATOM    320  CD1 PHE A  42     -60.001  79.670   8.819  1.00  0.63           C  
ATOM    321  CD2 PHE A  42     -59.131  79.466   6.568  1.00  0.63           C  
ATOM    322  CE1 PHE A  42     -58.825  80.317   9.217  1.00  0.63           C  
ATOM    323  CE2 PHE A  42     -57.954  80.113   6.961  1.00  0.63           C  
ATOM    324  CZ  PHE A  42     -57.801  80.538   8.287  1.00  0.63           C  
ATOM    325  N   LEU A  43     -62.558  80.342   4.561  1.00  0.69           N  
ATOM    326  CA  LEU A  43     -62.313  81.277   3.466  1.00  0.69           C  
ATOM    327  C   LEU A  43     -63.244  82.489   3.479  1.00  0.69           C  
ATOM    328  O   LEU A  43     -62.973  83.529   2.881  1.00  0.69           O  
ATOM    329  CB  LEU A  43     -62.449  80.554   2.110  1.00  0.69           C  
ATOM    330  CG  LEU A  43     -61.348  79.508   1.851  1.00  0.69           C  
ATOM    331  CD1 LEU A  43     -61.736  78.641   0.650  1.00  0.69           C  
ATOM    332  CD2 LEU A  43     -59.980  80.161   1.615  1.00  0.69           C  
ATOM    333  N   SER A  44     -64.353  82.408   4.239  1.00  0.67           N  
ATOM    334  CA  SER A  44     -65.250  83.534   4.459  1.00  0.67           C  
ATOM    335  C   SER A  44     -64.668  84.599   5.385  1.00  0.67           C  
ATOM    336  O   SER A  44     -65.167  85.720   5.412  1.00  0.67           O  
ATOM    337  CB  SER A  44     -66.577  83.124   5.151  1.00  0.67           C  
ATOM    338  OG  SER A  44     -67.333  82.159   4.423  1.00  0.67           O  
ATOM    339  N   VAL A  45     -63.616  84.274   6.174  1.00  0.64           N  
ATOM    340  CA  VAL A  45     -62.968  85.142   7.162  1.00  0.64           C  
ATOM    341  C   VAL A  45     -62.327  86.380   6.559  1.00  0.64           C  
ATOM    342  O   VAL A  45     -62.261  87.442   7.166  1.00  0.64           O  
ATOM    343  CB  VAL A  45     -61.954  84.366   8.009  1.00  0.64           C  
ATOM    344  CG1 VAL A  45     -61.161  85.274   8.973  1.00  0.64           C  
ATOM    345  CG2 VAL A  45     -62.714  83.304   8.830  1.00  0.64           C  
ATOM    346  N   TYR A  46     -61.811  86.297   5.324  1.00  0.62           N  
ATOM    347  CA  TYR A  46     -61.259  87.472   4.672  1.00  0.62           C  
ATOM    348  C   TYR A  46     -62.346  88.385   4.120  1.00  0.62           C  
ATOM    349  O   TYR A  46     -62.275  89.608   4.245  1.00  0.62           O  
ATOM    350  CB  TYR A  46     -60.259  87.060   3.566  1.00  0.62           C  
ATOM    351  CG  TYR A  46     -59.141  86.180   4.086  1.00  0.62           C  
ATOM    352  CD1 TYR A  46     -58.745  86.099   5.441  1.00  0.62           C  
ATOM    353  CD2 TYR A  46     -58.441  85.412   3.147  1.00  0.62           C  
ATOM    354  CE1 TYR A  46     -57.702  85.248   5.831  1.00  0.62           C  
ATOM    355  CE2 TYR A  46     -57.369  84.599   3.529  1.00  0.62           C  
ATOM    356  CZ  TYR A  46     -56.986  84.530   4.872  1.00  0.62           C  
ATOM    357  OH  TYR A  46     -55.842  83.805   5.265  1.00  0.62           O  
ATOM    358  N   VAL A  47     -63.390  87.788   3.510  1.00  0.66           N  
ATOM    359  CA  VAL A  47     -64.519  88.457   2.879  1.00  0.66           C  
ATOM    360  C   VAL A  47     -65.410  89.218   3.864  1.00  0.66           C  
ATOM    361  O   VAL A  47     -65.892  90.313   3.581  1.00  0.66           O  
ATOM    362  CB  VAL A  47     -65.337  87.459   2.055  1.00  0.66           C  
ATOM    363  CG1 VAL A  47     -66.490  88.150   1.297  1.00  0.66           C  
ATOM    364  CG2 VAL A  47     -64.409  86.765   1.033  1.00  0.66           C  
ATOM    365  N   ALA A  48     -65.642  88.659   5.058  1.00  0.58           N  
ATOM    366  CA  ALA A  48     -66.444  89.242   6.110  1.00  0.58           C  
ATOM    367  C   ALA A  48     -65.936  88.621   7.398  1.00  0.58           C  
ATOM    368  O   ALA A  48     -64.945  87.914   7.347  1.00  0.58           O  
ATOM    369  CB  ALA A  48     -67.942  88.957   5.891  1.00  0.58           C  
ATOM    370  N   ARG A  49     -66.556  88.892   8.568  1.00  0.52           N  
ATOM    371  CA  ARG A  49     -66.261  88.302   9.880  1.00  0.52           C  
ATOM    372  C   ARG A  49     -65.596  89.325  10.793  1.00  0.52           C  
ATOM    373  O   ARG A  49     -66.062  90.454  10.897  1.00  0.52           O  
ATOM    374  CB  ARG A  49     -65.555  86.901   9.978  1.00  0.52           C  
ATOM    375  CG  ARG A  49     -66.161  85.723   9.174  1.00  0.52           C  
ATOM    376  CD  ARG A  49     -67.566  85.261   9.553  1.00  0.52           C  
ATOM    377  NE  ARG A  49     -67.863  84.149   8.589  1.00  0.52           N  
ATOM    378  CZ  ARG A  49     -69.019  83.477   8.523  1.00  0.52           C  
ATOM    379  NH1 ARG A  49     -69.226  82.611   7.532  1.00  0.52           N  
ATOM    380  NH2 ARG A  49     -69.974  83.663   9.428  1.00  0.52           N  
ATOM    381  N   LEU A  50     -64.537  88.937  11.535  1.00  0.59           N  
ATOM    382  CA  LEU A  50     -64.006  89.719  12.637  1.00  0.59           C  
ATOM    383  C   LEU A  50     -62.939  90.715  12.235  1.00  0.59           C  
ATOM    384  O   LEU A  50     -63.068  91.923  12.457  1.00  0.59           O  
ATOM    385  CB  LEU A  50     -63.369  88.733  13.644  1.00  0.59           C  
ATOM    386  CG  LEU A  50     -62.677  89.358  14.869  1.00  0.59           C  
ATOM    387  CD1 LEU A  50     -63.564  90.355  15.604  1.00  0.59           C  
ATOM    388  CD2 LEU A  50     -62.246  88.259  15.842  1.00  0.59           C  
ATOM    389  N   ASP A  51     -61.848  90.218  11.631  1.00  0.65           N  
ATOM    390  CA  ASP A  51     -60.747  91.003  11.149  1.00  0.65           C  
ATOM    391  C   ASP A  51     -60.862  91.149   9.643  1.00  0.65           C  
ATOM    392  O   ASP A  51     -60.120  91.915   9.031  1.00  0.65           O  
ATOM    393  CB  ASP A  51     -59.425  90.289  11.553  1.00  0.65           C  
ATOM    394  CG  ASP A  51     -59.288  88.917  10.900  1.00  0.65           C  
ATOM    395  OD1 ASP A  51     -60.195  88.076  11.129  1.00  0.65           O  
ATOM    396  OD2 ASP A  51     -58.302  88.733  10.138  1.00  0.65           O  
ATOM    397  N   GLY A  52     -61.825  90.425   9.039  1.00  0.65           N  
ATOM    398  CA  GLY A  52     -62.200  90.467   7.638  1.00  0.65           C  
ATOM    399  C   GLY A  52     -62.602  91.808   7.115  1.00  0.65           C  
ATOM    400  O   GLY A  52     -62.799  92.782   7.837  1.00  0.65           O  
ATOM    401  N   ARG A  53     -62.747  91.905   5.789  1.00  0.59           N  
ATOM    402  CA  ARG A  53     -62.876  93.185   5.136  1.00  0.59           C  
ATOM    403  C   ARG A  53     -64.113  94.002   5.490  1.00  0.59           C  
ATOM    404  O   ARG A  53     -64.023  95.202   5.726  1.00  0.59           O  
ATOM    405  CB  ARG A  53     -62.672  93.057   3.617  1.00  0.59           C  
ATOM    406  CG  ARG A  53     -63.831  92.477   2.804  1.00  0.59           C  
ATOM    407  CD  ARG A  53     -63.736  92.834   1.325  1.00  0.59           C  
ATOM    408  NE  ARG A  53     -64.870  92.123   0.684  1.00  0.59           N  
ATOM    409  CZ  ARG A  53     -65.923  92.718   0.122  1.00  0.59           C  
ATOM    410  NH1 ARG A  53     -66.878  91.949  -0.390  1.00  0.59           N  
ATOM    411  NH2 ARG A  53     -66.035  94.033  -0.022  1.00  0.59           N  
ATOM    412  N   LEU A  54     -65.310  93.397   5.615  1.00  0.51           N  
ATOM    413  CA  LEU A  54     -66.510  94.164   5.928  1.00  0.51           C  
ATOM    414  C   LEU A  54     -66.541  94.680   7.357  1.00  0.51           C  
ATOM    415  O   LEU A  54     -67.347  95.534   7.703  1.00  0.51           O  
ATOM    416  CB  LEU A  54     -67.805  93.386   5.607  1.00  0.51           C  
ATOM    417  CG  LEU A  54     -67.978  93.059   4.108  1.00  0.51           C  
ATOM    418  CD1 LEU A  54     -69.280  92.279   3.883  1.00  0.51           C  
ATOM    419  CD2 LEU A  54     -67.964  94.307   3.210  1.00  0.51           C  
ATOM    420  N   ALA A  55     -65.601  94.217   8.200  1.00  0.54           N  
ATOM    421  CA  ALA A  55     -65.349  94.759   9.510  1.00  0.54           C  
ATOM    422  C   ALA A  55     -64.235  95.812   9.496  1.00  0.54           C  
ATOM    423  O   ALA A  55     -63.831  96.330  10.540  1.00  0.54           O  
ATOM    424  CB  ALA A  55     -64.936  93.585  10.409  1.00  0.54           C  
ATOM    425  N   ARG A  56     -63.709  96.179   8.303  1.00  0.48           N  
ATOM    426  CA  ARG A  56     -62.682  97.189   8.166  1.00  0.48           C  
ATOM    427  C   ARG A  56     -63.157  98.517   7.594  1.00  0.48           C  
ATOM    428  O   ARG A  56     -62.589  99.552   7.956  1.00  0.48           O  
ATOM    429  CB  ARG A  56     -61.486  96.681   7.325  1.00  0.48           C  
ATOM    430  CG  ARG A  56     -60.669  95.629   8.089  1.00  0.48           C  
ATOM    431  CD  ARG A  56     -59.408  95.162   7.368  1.00  0.48           C  
ATOM    432  NE  ARG A  56     -58.855  94.109   8.264  1.00  0.48           N  
ATOM    433  CZ  ARG A  56     -57.710  94.104   8.953  1.00  0.48           C  
ATOM    434  NH1 ARG A  56     -57.520  93.108   9.816  1.00  0.48           N  
ATOM    435  NH2 ARG A  56     -56.771  95.021   8.772  1.00  0.48           N  
ATOM    436  N   CYS A  57     -64.203  98.548   6.744  1.00  0.45           N  
ATOM    437  CA  CYS A  57     -64.763  99.798   6.234  1.00  0.45           C  
ATOM    438  C   CYS A  57     -65.716 100.432   7.223  1.00  0.45           C  
ATOM    439  O   CYS A  57     -65.862 101.650   7.282  1.00  0.45           O  
ATOM    440  CB  CYS A  57     -65.480  99.623   4.864  1.00  0.45           C  
ATOM    441  SG  CYS A  57     -66.509  98.120   4.713  1.00  0.45           S  
ATOM    442  N   ILE A  58     -66.362  99.608   8.061  1.00  0.29           N  
ATOM    443  CA  ILE A  58     -67.322 100.067   9.039  1.00  0.29           C  
ATOM    444  C   ILE A  58     -66.676 100.464  10.356  1.00  0.29           C  
ATOM    445  O   ILE A  58     -65.555 100.079  10.698  1.00  0.29           O  
ATOM    446  CB  ILE A  58     -68.428  99.043   9.291  1.00  0.29           C  
ATOM    447  CG1 ILE A  58     -67.913  97.787  10.039  1.00  0.29           C  
ATOM    448  CG2 ILE A  58     -69.057  98.688   7.924  1.00  0.29           C  
ATOM    449  CD1 ILE A  58     -68.993  96.731  10.299  1.00  0.29           C  
ATOM    450  N   ALA A  59     -67.414 101.247  11.163  1.00  0.32           N  
ATOM    451  CA  ALA A  59     -67.052 101.524  12.530  1.00  0.32           C  
ATOM    452  C   ALA A  59     -67.740 100.525  13.451  1.00  0.32           C  
ATOM    453  O   ALA A  59     -68.965 100.455  13.542  1.00  0.32           O  
ATOM    454  CB  ALA A  59     -67.445 102.963  12.911  1.00  0.32           C  
ATOM    455  N   ARG A  60     -66.953  99.698  14.163  1.00  0.38           N  
ATOM    456  CA  ARG A  60     -67.498  98.680  15.036  1.00  0.38           C  
ATOM    457  C   ARG A  60     -67.770  99.250  16.419  1.00  0.38           C  
ATOM    458  O   ARG A  60     -66.853  99.646  17.132  1.00  0.38           O  
ATOM    459  CB  ARG A  60     -66.538  97.467  15.184  1.00  0.38           C  
ATOM    460  CG  ARG A  60     -66.162  96.799  13.842  1.00  0.38           C  
ATOM    461  CD  ARG A  60     -65.251  95.563  13.946  1.00  0.38           C  
ATOM    462  NE  ARG A  60     -64.022  95.971  14.705  1.00  0.38           N  
ATOM    463  CZ  ARG A  60     -63.007  95.153  15.022  1.00  0.38           C  
ATOM    464  NH1 ARG A  60     -62.061  95.592  15.856  1.00  0.38           N  
ATOM    465  NH2 ARG A  60     -62.906  93.920  14.541  1.00  0.38           N  
ATOM    466  N   LYS A  61     -69.051  99.294  16.829  1.00  0.40           N  
ATOM    467  CA  LYS A  61     -69.445  99.656  18.179  1.00  0.40           C  
ATOM    468  C   LYS A  61     -69.528  98.394  19.045  1.00  0.40           C  
ATOM    469  O   LYS A  61     -68.535  97.735  19.340  1.00  0.40           O  
ATOM    470  CB  LYS A  61     -70.818 100.382  18.152  1.00  0.40           C  
ATOM    471  CG  LYS A  61     -70.854 101.677  17.325  1.00  0.40           C  
ATOM    472  CD  LYS A  61     -72.284 102.247  17.280  1.00  0.40           C  
ATOM    473  CE  LYS A  61     -72.417 103.516  16.433  1.00  0.40           C  
ATOM    474  NZ  LYS A  61     -73.830 103.965  16.408  1.00  0.40           N  
ATOM    475  N   ASP A  62     -70.755  97.986  19.415  1.00  0.48           N  
ATOM    476  CA  ASP A  62     -71.045  96.808  20.194  1.00  0.48           C  
ATOM    477  C   ASP A  62     -71.465  95.530  19.431  1.00  0.48           C  
ATOM    478  O   ASP A  62     -71.846  94.588  20.132  1.00  0.48           O  
ATOM    479  CB  ASP A  62     -72.094  97.152  21.274  1.00  0.48           C  
ATOM    480  CG  ASP A  62     -71.770  98.501  21.891  1.00  0.48           C  
ATOM    481  OD1 ASP A  62     -72.060  99.564  21.273  1.00  0.48           O  
ATOM    482  OD2 ASP A  62     -71.081  98.504  22.942  1.00  0.48           O  
ATOM    483  N   PRO A  63     -71.385  95.265  18.092  1.00  0.52           N  
ATOM    484  CA  PRO A  63     -71.419  93.889  17.592  1.00  0.52           C  
ATOM    485  C   PRO A  63     -70.159  93.151  18.009  1.00  0.52           C  
ATOM    486  O   PRO A  63     -70.065  91.955  17.769  1.00  0.52           O  
ATOM    487  CB  PRO A  63     -71.535  94.039  16.068  1.00  0.52           C  
ATOM    488  CG  PRO A  63     -70.767  95.323  15.769  1.00  0.52           C  
ATOM    489  CD  PRO A  63     -71.064  96.192  16.996  1.00  0.52           C  
ATOM    490  N   ARG A  64     -69.201  93.848  18.661  1.00  0.48           N  
ATOM    491  CA  ARG A  64     -68.191  93.308  19.549  1.00  0.48           C  
ATOM    492  C   ARG A  64     -68.637  92.135  20.417  1.00  0.48           C  
ATOM    493  O   ARG A  64     -68.267  90.999  20.158  1.00  0.48           O  
ATOM    494  CB  ARG A  64     -67.587  94.436  20.417  1.00  0.48           C  
ATOM    495  CG  ARG A  64     -66.296  94.008  21.142  1.00  0.48           C  
ATOM    496  CD  ARG A  64     -65.695  95.089  22.056  1.00  0.48           C  
ATOM    497  NE  ARG A  64     -66.600  95.327  23.234  1.00  0.48           N  
ATOM    498  CZ  ARG A  64     -66.690  94.522  24.302  1.00  0.48           C  
ATOM    499  NH1 ARG A  64     -67.349  94.932  25.382  1.00  0.48           N  
ATOM    500  NH2 ARG A  64     -66.044  93.364  24.359  1.00  0.48           N  
ATOM    501  N   ALA A  65     -69.485  92.347  21.443  1.00  0.62           N  
ATOM    502  CA  ALA A  65     -69.882  91.269  22.329  1.00  0.62           C  
ATOM    503  C   ALA A  65     -70.692  90.167  21.645  1.00  0.62           C  
ATOM    504  O   ALA A  65     -70.398  88.981  21.766  1.00  0.62           O  
ATOM    505  CB  ALA A  65     -70.689  91.880  23.490  1.00  0.62           C  
ATOM    506  N   PHE A  66     -71.710  90.543  20.848  1.00  0.52           N  
ATOM    507  CA  PHE A  66     -72.574  89.600  20.155  1.00  0.52           C  
ATOM    508  C   PHE A  66     -71.874  88.774  19.085  1.00  0.52           C  
ATOM    509  O   PHE A  66     -72.037  87.558  19.005  1.00  0.52           O  
ATOM    510  CB  PHE A  66     -73.761  90.344  19.495  1.00  0.52           C  
ATOM    511  CG  PHE A  66     -74.634  90.940  20.561  1.00  0.52           C  
ATOM    512  CD1 PHE A  66     -74.547  92.301  20.896  1.00  0.52           C  
ATOM    513  CD2 PHE A  66     -75.543  90.123  21.254  1.00  0.52           C  
ATOM    514  CE1 PHE A  66     -75.351  92.836  21.912  1.00  0.52           C  
ATOM    515  CE2 PHE A  66     -76.351  90.655  22.267  1.00  0.52           C  
ATOM    516  CZ  PHE A  66     -76.253  92.013  22.596  1.00  0.52           C  
ATOM    517  N   GLY A  67     -71.044  89.414  18.241  1.00  0.69           N  
ATOM    518  CA  GLY A  67     -70.370  88.765  17.127  1.00  0.69           C  
ATOM    519  C   GLY A  67     -69.201  87.939  17.559  1.00  0.69           C  
ATOM    520  O   GLY A  67     -68.927  86.889  16.990  1.00  0.69           O  
ATOM    521  N   TRP A  68     -68.470  88.376  18.597  1.00  0.58           N  
ATOM    522  CA  TRP A  68     -67.389  87.610  19.171  1.00  0.58           C  
ATOM    523  C   TRP A  68     -67.925  86.405  19.944  1.00  0.58           C  
ATOM    524  O   TRP A  68     -67.361  85.319  19.872  1.00  0.58           O  
ATOM    525  CB  TRP A  68     -66.472  88.474  20.064  1.00  0.58           C  
ATOM    526  CG  TRP A  68     -65.466  89.450  19.428  1.00  0.58           C  
ATOM    527  CD1 TRP A  68     -64.189  89.577  19.892  1.00  0.58           C  
ATOM    528  CD2 TRP A  68     -65.619  90.534  18.457  1.00  0.58           C  
ATOM    529  NE1 TRP A  68     -63.582  90.702  19.386  1.00  0.58           N  
ATOM    530  CE2 TRP A  68     -64.466  91.323  18.545  1.00  0.58           C  
ATOM    531  CE3 TRP A  68     -66.645  90.887  17.568  1.00  0.58           C  
ATOM    532  CZ2 TRP A  68     -64.331  92.517  17.841  1.00  0.58           C  
ATOM    533  CZ3 TRP A  68     -66.492  92.066  16.811  1.00  0.58           C  
ATOM    534  CH2 TRP A  68     -65.374  92.889  16.979  1.00  0.58           C  
ATOM    535  N   GLN A  69     -69.064  86.535  20.662  1.00  0.64           N  
ATOM    536  CA  GLN A  69     -69.780  85.408  21.249  1.00  0.64           C  
ATOM    537  C   GLN A  69     -70.306  84.414  20.210  1.00  0.64           C  
ATOM    538  O   GLN A  69     -70.220  83.197  20.389  1.00  0.64           O  
ATOM    539  CB  GLN A  69     -70.946  85.915  22.136  1.00  0.64           C  
ATOM    540  CG  GLN A  69     -71.793  84.828  22.845  1.00  0.64           C  
ATOM    541  CD  GLN A  69     -70.977  83.980  23.823  1.00  0.64           C  
ATOM    542  OE1 GLN A  69     -70.751  84.350  24.971  1.00  0.64           O  
ATOM    543  NE2 GLN A  69     -70.534  82.784  23.370  1.00  0.64           N  
ATOM    544  N   LEU A  70     -70.833  84.910  19.070  1.00  0.67           N  
ATOM    545  CA  LEU A  70     -71.184  84.107  17.907  1.00  0.67           C  
ATOM    546  C   LEU A  70     -69.982  83.378  17.318  1.00  0.67           C  
ATOM    547  O   LEU A  70     -70.024  82.176  17.060  1.00  0.67           O  
ATOM    548  CB  LEU A  70     -71.806  85.030  16.828  1.00  0.67           C  
ATOM    549  CG  LEU A  70     -72.181  84.373  15.483  1.00  0.67           C  
ATOM    550  CD1 LEU A  70     -73.284  83.318  15.641  1.00  0.67           C  
ATOM    551  CD2 LEU A  70     -72.606  85.456  14.480  1.00  0.67           C  
ATOM    552  N   LEU A  71     -68.840  84.077  17.162  1.00  0.67           N  
ATOM    553  CA  LEU A  71     -67.572  83.479  16.790  1.00  0.67           C  
ATOM    554  C   LEU A  71     -67.080  82.464  17.792  1.00  0.67           C  
ATOM    555  O   LEU A  71     -66.598  81.417  17.397  1.00  0.67           O  
ATOM    556  CB  LEU A  71     -66.479  84.536  16.543  1.00  0.67           C  
ATOM    557  CG  LEU A  71     -66.654  85.264  15.200  1.00  0.67           C  
ATOM    558  CD1 LEU A  71     -65.942  86.616  15.240  1.00  0.67           C  
ATOM    559  CD2 LEU A  71     -66.128  84.420  14.027  1.00  0.67           C  
ATOM    560  N   GLN A  72     -67.225  82.688  19.107  1.00  0.66           N  
ATOM    561  CA  GLN A  72     -66.906  81.692  20.113  1.00  0.66           C  
ATOM    562  C   GLN A  72     -67.716  80.407  19.980  1.00  0.66           C  
ATOM    563  O   GLN A  72     -67.182  79.315  20.133  1.00  0.66           O  
ATOM    564  CB  GLN A  72     -67.048  82.272  21.541  1.00  0.66           C  
ATOM    565  CG  GLN A  72     -66.553  81.330  22.666  1.00  0.66           C  
ATOM    566  CD  GLN A  72     -65.099  80.914  22.426  1.00  0.66           C  
ATOM    567  OE1 GLN A  72     -64.246  81.733  22.092  1.00  0.66           O  
ATOM    568  NE2 GLN A  72     -64.799  79.603  22.565  1.00  0.66           N  
ATOM    569  N   TRP A  73     -69.019  80.487  19.640  1.00  0.67           N  
ATOM    570  CA  TRP A  73     -69.800  79.314  19.268  1.00  0.67           C  
ATOM    571  C   TRP A  73     -69.285  78.624  17.994  1.00  0.67           C  
ATOM    572  O   TRP A  73     -69.094  77.407  17.954  1.00  0.67           O  
ATOM    573  CB  TRP A  73     -71.296  79.700  19.126  1.00  0.67           C  
ATOM    574  CG  TRP A  73     -72.224  78.526  18.862  1.00  0.67           C  
ATOM    575  CD1 TRP A  73     -72.693  77.585  19.737  1.00  0.67           C  
ATOM    576  CD2 TRP A  73     -72.697  78.142  17.558  1.00  0.67           C  
ATOM    577  NE1 TRP A  73     -73.437  76.638  19.066  1.00  0.67           N  
ATOM    578  CE2 TRP A  73     -73.446  76.959  17.726  1.00  0.67           C  
ATOM    579  CE3 TRP A  73     -72.523  78.713  16.299  1.00  0.67           C  
ATOM    580  CZ2 TRP A  73     -74.032  76.325  16.638  1.00  0.67           C  
ATOM    581  CZ3 TRP A  73     -73.118  78.074  15.201  1.00  0.67           C  
ATOM    582  CH2 TRP A  73     -73.859  76.894  15.366  1.00  0.67           C  
ATOM    583  N   LEU A  74     -68.958  79.402  16.938  1.00  0.69           N  
ATOM    584  CA  LEU A  74     -68.332  78.903  15.717  1.00  0.69           C  
ATOM    585  C   LEU A  74     -66.976  78.254  15.980  1.00  0.69           C  
ATOM    586  O   LEU A  74     -66.623  77.249  15.375  1.00  0.69           O  
ATOM    587  CB  LEU A  74     -68.167  80.018  14.650  1.00  0.69           C  
ATOM    588  CG  LEU A  74     -69.493  80.593  14.104  1.00  0.69           C  
ATOM    589  CD1 LEU A  74     -69.245  81.874  13.291  1.00  0.69           C  
ATOM    590  CD2 LEU A  74     -70.260  79.577  13.246  1.00  0.69           C  
ATOM    591  N   LEU A  75     -66.203  78.783  16.941  1.00  0.68           N  
ATOM    592  CA  LEU A  75     -64.911  78.281  17.359  1.00  0.68           C  
ATOM    593  C   LEU A  75     -65.015  77.247  18.472  1.00  0.68           C  
ATOM    594  O   LEU A  75     -64.012  76.841  19.050  1.00  0.68           O  
ATOM    595  CB  LEU A  75     -64.012  79.440  17.848  1.00  0.68           C  
ATOM    596  CG  LEU A  75     -63.673  80.476  16.758  1.00  0.68           C  
ATOM    597  CD1 LEU A  75     -63.092  81.736  17.412  1.00  0.68           C  
ATOM    598  CD2 LEU A  75     -62.731  79.913  15.686  1.00  0.68           C  
ATOM    599  N   ILE A  76     -66.227  76.735  18.753  1.00  0.67           N  
ATOM    600  CA  ILE A  76     -66.428  75.485  19.473  1.00  0.67           C  
ATOM    601  C   ILE A  76     -66.866  74.438  18.457  1.00  0.67           C  
ATOM    602  O   ILE A  76     -66.387  73.303  18.453  1.00  0.67           O  
ATOM    603  CB  ILE A  76     -67.451  75.674  20.594  1.00  0.67           C  
ATOM    604  CG1 ILE A  76     -66.802  76.494  21.738  1.00  0.67           C  
ATOM    605  CG2 ILE A  76     -67.980  74.320  21.119  1.00  0.67           C  
ATOM    606  CD1 ILE A  76     -67.812  77.110  22.715  1.00  0.67           C  
ATOM    607  N   ALA A  77     -67.729  74.821  17.492  1.00  0.76           N  
ATOM    608  CA  ALA A  77     -68.117  73.982  16.375  1.00  0.76           C  
ATOM    609  C   ALA A  77     -66.963  73.602  15.441  1.00  0.76           C  
ATOM    610  O   ALA A  77     -66.834  72.452  15.022  1.00  0.76           O  
ATOM    611  CB  ALA A  77     -69.226  74.693  15.575  1.00  0.76           C  
ATOM    612  N   LEU A  78     -66.076  74.555  15.098  1.00  0.71           N  
ATOM    613  CA  LEU A  78     -64.892  74.334  14.282  1.00  0.71           C  
ATOM    614  C   LEU A  78     -63.868  73.355  14.889  1.00  0.71           C  
ATOM    615  O   LEU A  78     -63.488  72.423  14.176  1.00  0.71           O  
ATOM    616  CB  LEU A  78     -64.291  75.715  13.890  1.00  0.71           C  
ATOM    617  CG  LEU A  78     -62.956  75.708  13.121  1.00  0.71           C  
ATOM    618  CD1 LEU A  78     -63.100  75.067  11.741  1.00  0.71           C  
ATOM    619  CD2 LEU A  78     -62.407  77.135  12.980  1.00  0.71           C  
ATOM    620  N   PRO A  79     -63.434  73.405  16.157  1.00  0.79           N  
ATOM    621  CA  PRO A  79     -62.662  72.339  16.784  1.00  0.79           C  
ATOM    622  C   PRO A  79     -63.382  71.022  16.866  1.00  0.79           C  
ATOM    623  O   PRO A  79     -62.760  70.003  16.602  1.00  0.79           O  
ATOM    624  CB  PRO A  79     -62.317  72.875  18.177  1.00  0.79           C  
ATOM    625  CG  PRO A  79     -62.212  74.374  17.938  1.00  0.79           C  
ATOM    626  CD  PRO A  79     -63.331  74.632  16.933  1.00  0.79           C  
ATOM    627  N   ALA A  80     -64.688  70.987  17.191  1.00  0.77           N  
ATOM    628  CA  ALA A  80     -65.458  69.754  17.200  1.00  0.77           C  
ATOM    629  C   ALA A  80     -65.548  69.089  15.824  1.00  0.77           C  
ATOM    630  O   ALA A  80     -65.429  67.874  15.667  1.00  0.77           O  
ATOM    631  CB  ALA A  80     -66.868  70.030  17.751  1.00  0.77           C  
ATOM    632  N   THR A  81     -65.724  69.894  14.765  1.00  0.78           N  
ATOM    633  CA  THR A  81     -65.669  69.455  13.373  1.00  0.78           C  
ATOM    634  C   THR A  81     -64.297  68.923  12.994  1.00  0.78           C  
ATOM    635  O   THR A  81     -64.172  67.868  12.370  1.00  0.78           O  
ATOM    636  CB  THR A  81     -66.064  70.568  12.411  1.00  0.78           C  
ATOM    637  OG1 THR A  81     -67.371  71.028  12.722  1.00  0.78           O  
ATOM    638  CG2 THR A  81     -66.140  70.066  10.966  1.00  0.78           C  
ATOM    639  N   PHE A  82     -63.219  69.619  13.416  1.00  0.75           N  
ATOM    640  CA  PHE A  82     -61.840  69.189  13.252  1.00  0.75           C  
ATOM    641  C   PHE A  82     -61.531  67.884  13.991  1.00  0.75           C  
ATOM    642  O   PHE A  82     -60.925  66.981  13.420  1.00  0.75           O  
ATOM    643  CB  PHE A  82     -60.890  70.337  13.695  1.00  0.75           C  
ATOM    644  CG  PHE A  82     -59.461  70.101  13.286  1.00  0.75           C  
ATOM    645  CD1 PHE A  82     -59.081  70.193  11.936  1.00  0.75           C  
ATOM    646  CD2 PHE A  82     -58.483  69.807  14.250  1.00  0.75           C  
ATOM    647  CE1 PHE A  82     -57.748  69.988  11.555  1.00  0.75           C  
ATOM    648  CE2 PHE A  82     -57.150  69.602  13.873  1.00  0.75           C  
ATOM    649  CZ  PHE A  82     -56.782  69.690  12.525  1.00  0.75           C  
ATOM    650  N   VAL A  83     -62.006  67.725  15.250  1.00  0.80           N  
ATOM    651  CA  VAL A  83     -61.894  66.505  16.051  1.00  0.80           C  
ATOM    652  C   VAL A  83     -62.430  65.295  15.342  1.00  0.80           C  
ATOM    653  O   VAL A  83     -61.751  64.295  15.116  1.00  0.80           O  
ATOM    654  CB  VAL A  83     -62.688  66.624  17.362  1.00  0.80           C  
ATOM    655  CG1 VAL A  83     -62.995  65.283  18.073  1.00  0.80           C  
ATOM    656  CG2 VAL A  83     -61.868  67.466  18.325  1.00  0.80           C  
ATOM    657  N   ASN A  84     -63.695  65.389  14.922  1.00  0.79           N  
ATOM    658  CA  ASN A  84     -64.382  64.288  14.309  1.00  0.79           C  
ATOM    659  C   ASN A  84     -63.788  63.949  12.948  1.00  0.79           C  
ATOM    660  O   ASN A  84     -63.687  62.784  12.578  1.00  0.79           O  
ATOM    661  CB  ASN A  84     -65.889  64.606  14.274  1.00  0.79           C  
ATOM    662  CG  ASN A  84     -66.435  64.552  15.699  1.00  0.79           C  
ATOM    663  OD1 ASN A  84     -66.260  63.557  16.397  1.00  0.79           O  
ATOM    664  ND2 ASN A  84     -67.143  65.612  16.140  1.00  0.79           N  
ATOM    665  N   SER A  85     -63.330  64.960  12.182  1.00  0.83           N  
ATOM    666  CA  SER A  85     -62.576  64.732  10.954  1.00  0.83           C  
ATOM    667  C   SER A  85     -61.237  64.029  11.164  1.00  0.83           C  
ATOM    668  O   SER A  85     -60.922  63.037  10.505  1.00  0.83           O  
ATOM    669  CB  SER A  85     -62.302  66.074  10.228  1.00  0.83           C  
ATOM    670  OG  SER A  85     -61.962  65.853   8.861  1.00  0.83           O  
ATOM    671  N   ALA A  86     -60.431  64.506  12.136  1.00  0.84           N  
ATOM    672  CA  ALA A  86     -59.115  63.983  12.435  1.00  0.84           C  
ATOM    673  C   ALA A  86     -59.113  62.548  12.943  1.00  0.84           C  
ATOM    674  O   ALA A  86     -58.312  61.740  12.478  1.00  0.84           O  
ATOM    675  CB  ALA A  86     -58.398  64.916  13.429  1.00  0.84           C  
ATOM    676  N   ILE A  87     -60.046  62.177  13.857  1.00  0.79           N  
ATOM    677  CA  ILE A  87     -60.235  60.799  14.322  1.00  0.79           C  
ATOM    678  C   ILE A  87     -60.512  59.877  13.151  1.00  0.79           C  
ATOM    679  O   ILE A  87     -59.799  58.901  12.929  1.00  0.79           O  
ATOM    680  CB  ILE A  87     -61.380  60.723  15.353  1.00  0.79           C  
ATOM    681  CG1 ILE A  87     -60.865  61.101  16.759  1.00  0.79           C  
ATOM    682  CG2 ILE A  87     -62.022  59.324  15.453  1.00  0.79           C  
ATOM    683  CD1 ILE A  87     -61.969  61.522  17.739  1.00  0.79           C  
ATOM    684  N   ARG A  88     -61.489  60.239  12.300  1.00  0.71           N  
ATOM    685  CA  ARG A  88     -61.902  59.428  11.179  1.00  0.71           C  
ATOM    686  C   ARG A  88     -60.838  59.208  10.118  1.00  0.71           C  
ATOM    687  O   ARG A  88     -60.644  58.091   9.639  1.00  0.71           O  
ATOM    688  CB  ARG A  88     -63.149  60.064  10.538  1.00  0.71           C  
ATOM    689  CG  ARG A  88     -64.407  59.859  11.401  1.00  0.71           C  
ATOM    690  CD  ARG A  88     -65.710  60.181  10.672  1.00  0.71           C  
ATOM    691  NE  ARG A  88     -65.637  61.605  10.202  1.00  0.71           N  
ATOM    692  CZ  ARG A  88     -66.283  62.638  10.755  1.00  0.71           C  
ATOM    693  NH1 ARG A  88     -66.209  63.840  10.188  1.00  0.71           N  
ATOM    694  NH2 ARG A  88     -67.062  62.479  11.815  1.00  0.71           N  
ATOM    695  N   TYR A  89     -60.081  60.255   9.729  1.00  0.73           N  
ATOM    696  CA  TYR A  89     -58.952  60.070   8.834  1.00  0.73           C  
ATOM    697  C   TYR A  89     -57.859  59.215   9.433  1.00  0.73           C  
ATOM    698  O   TYR A  89     -57.318  58.330   8.772  1.00  0.73           O  
ATOM    699  CB  TYR A  89     -58.302  61.414   8.415  1.00  0.73           C  
ATOM    700  CG  TYR A  89     -59.104  62.065   7.332  1.00  0.73           C  
ATOM    701  CD1 TYR A  89     -59.635  63.350   7.506  1.00  0.73           C  
ATOM    702  CD2 TYR A  89     -59.292  61.409   6.102  1.00  0.73           C  
ATOM    703  CE1 TYR A  89     -60.354  63.961   6.471  1.00  0.73           C  
ATOM    704  CE2 TYR A  89     -60.010  62.022   5.067  1.00  0.73           C  
ATOM    705  CZ  TYR A  89     -60.533  63.304   5.252  1.00  0.73           C  
ATOM    706  OH  TYR A  89     -61.189  63.951   4.191  1.00  0.73           O  
ATOM    707  N   LEU A  90     -57.488  59.449  10.702  1.00  0.78           N  
ATOM    708  CA  LEU A  90     -56.454  58.682  11.358  1.00  0.78           C  
ATOM    709  C   LEU A  90     -56.826  57.222  11.581  1.00  0.78           C  
ATOM    710  O   LEU A  90     -56.046  56.347  11.217  1.00  0.78           O  
ATOM    711  CB  LEU A  90     -55.980  59.402  12.632  1.00  0.78           C  
ATOM    712  CG  LEU A  90     -55.241  60.738  12.381  1.00  0.78           C  
ATOM    713  CD1 LEU A  90     -55.212  61.603  13.651  1.00  0.78           C  
ATOM    714  CD2 LEU A  90     -53.804  60.522  11.883  1.00  0.78           C  
ATOM    715  N   GLU A  91     -58.046  56.907  12.076  1.00  0.74           N  
ATOM    716  CA  GLU A  91     -58.551  55.543  12.210  1.00  0.74           C  
ATOM    717  C   GLU A  91     -58.637  54.854  10.867  1.00  0.74           C  
ATOM    718  O   GLU A  91     -58.212  53.713  10.678  1.00  0.74           O  
ATOM    719  CB  GLU A  91     -59.970  55.530  12.815  1.00  0.74           C  
ATOM    720  CG  GLU A  91     -60.034  55.873  14.319  1.00  0.74           C  
ATOM    721  CD  GLU A  91     -61.477  56.063  14.787  1.00  0.74           C  
ATOM    722  OE1 GLU A  91     -62.391  56.154  13.922  1.00  0.74           O  
ATOM    723  OE2 GLU A  91     -61.661  56.173  16.025  1.00  0.74           O  
ATOM    724  N   GLY A  92     -59.136  55.600   9.858  1.00  0.76           N  
ATOM    725  CA  GLY A  92     -59.122  55.230   8.457  1.00  0.76           C  
ATOM    726  C   GLY A  92     -57.800  54.719   7.949  1.00  0.76           C  
ATOM    727  O   GLY A  92     -57.754  53.658   7.333  1.00  0.76           O  
ATOM    728  N   GLN A  93     -56.696  55.443   8.190  1.00  0.68           N  
ATOM    729  CA  GLN A  93     -55.356  55.057   7.774  1.00  0.68           C  
ATOM    730  C   GLN A  93     -54.899  53.740   8.385  1.00  0.68           C  
ATOM    731  O   GLN A  93     -54.440  52.840   7.687  1.00  0.68           O  
ATOM    732  CB  GLN A  93     -54.371  56.201   8.112  1.00  0.68           C  
ATOM    733  CG  GLN A  93     -54.590  57.394   7.155  1.00  0.68           C  
ATOM    734  CD  GLN A  93     -54.019  58.724   7.636  1.00  0.68           C  
ATOM    735  OE1 GLN A  93     -53.008  59.229   7.162  1.00  0.68           O  
ATOM    736  NE2 GLN A  93     -54.748  59.406   8.538  1.00  0.68           N  
ATOM    737  N   LEU A  94     -55.123  53.537   9.695  1.00  0.74           N  
ATOM    738  CA  LEU A  94     -54.846  52.284  10.385  1.00  0.74           C  
ATOM    739  C   LEU A  94     -55.640  51.110   9.831  1.00  0.74           C  
ATOM    740  O   LEU A  94     -55.147  49.988   9.697  1.00  0.74           O  
ATOM    741  CB  LEU A  94     -55.216  52.390  11.871  1.00  0.74           C  
ATOM    742  CG  LEU A  94     -54.684  53.624  12.597  1.00  0.74           C  
ATOM    743  CD1 LEU A  94     -55.382  53.665  13.954  1.00  0.74           C  
ATOM    744  CD2 LEU A  94     -53.158  53.638  12.719  1.00  0.74           C  
ATOM    745  N   ALA A  95     -56.902  51.393   9.448  1.00  0.73           N  
ATOM    746  CA  ALA A  95     -57.841  50.450   8.890  1.00  0.73           C  
ATOM    747  C   ALA A  95     -57.648  50.270   7.384  1.00  0.73           C  
ATOM    748  O   ALA A  95     -58.403  49.577   6.706  1.00  0.73           O  
ATOM    749  CB  ALA A  95     -59.269  50.942   9.187  1.00  0.73           C  
ATOM    750  N   LEU A  96     -56.574  50.861   6.835  1.00  0.69           N  
ATOM    751  CA  LEU A  96     -55.937  50.417   5.619  1.00  0.69           C  
ATOM    752  C   LEU A  96     -54.685  49.629   6.001  1.00  0.69           C  
ATOM    753  O   LEU A  96     -54.534  48.457   5.670  1.00  0.69           O  
ATOM    754  CB  LEU A  96     -55.617  51.658   4.745  1.00  0.69           C  
ATOM    755  CG  LEU A  96     -55.149  51.377   3.304  1.00  0.69           C  
ATOM    756  CD1 LEU A  96     -55.290  52.632   2.439  1.00  0.69           C  
ATOM    757  CD2 LEU A  96     -53.694  50.920   3.232  1.00  0.69           C  
ATOM    758  N   SER A  97     -53.758  50.266   6.738  1.00  0.74           N  
ATOM    759  CA  SER A  97     -52.409  49.790   7.032  1.00  0.74           C  
ATOM    760  C   SER A  97     -52.270  48.418   7.682  1.00  0.74           C  
ATOM    761  O   SER A  97     -51.744  47.467   7.104  1.00  0.74           O  
ATOM    762  CB  SER A  97     -51.757  50.822   7.985  1.00  0.74           C  
ATOM    763  OG  SER A  97     -50.338  50.831   7.887  1.00  0.74           O  
ATOM    764  N   PHE A  98     -52.809  48.255   8.906  1.00  0.68           N  
ATOM    765  CA  PHE A  98     -52.568  47.070   9.721  1.00  0.68           C  
ATOM    766  C   PHE A  98     -53.787  46.169   9.663  1.00  0.68           C  
ATOM    767  O   PHE A  98     -53.787  45.025  10.098  1.00  0.68           O  
ATOM    768  CB  PHE A  98     -52.323  47.472  11.205  1.00  0.68           C  
ATOM    769  CG  PHE A  98     -50.903  47.914  11.498  1.00  0.68           C  
ATOM    770  CD1 PHE A  98     -50.154  48.775  10.676  1.00  0.68           C  
ATOM    771  CD2 PHE A  98     -50.299  47.466  12.680  1.00  0.68           C  
ATOM    772  CE1 PHE A  98     -48.864  49.185  11.033  1.00  0.68           C  
ATOM    773  CE2 PHE A  98     -48.983  47.798  13.012  1.00  0.68           C  
ATOM    774  CZ  PHE A  98     -48.277  48.684  12.198  1.00  0.68           C  
ATOM    775  N   ARG A  99     -54.882  46.676   9.080  1.00  0.65           N  
ATOM    776  CA  ARG A  99     -56.065  45.898   8.808  1.00  0.65           C  
ATOM    777  C   ARG A  99     -55.996  45.183   7.464  1.00  0.65           C  
ATOM    778  O   ARG A  99     -56.547  44.093   7.326  1.00  0.65           O  
ATOM    779  CB  ARG A  99     -57.262  46.869   8.856  1.00  0.65           C  
ATOM    780  CG  ARG A  99     -58.653  46.313   8.488  1.00  0.65           C  
ATOM    781  CD  ARG A  99     -59.163  45.182   9.381  1.00  0.65           C  
ATOM    782  NE  ARG A  99     -60.569  44.933   8.927  1.00  0.65           N  
ATOM    783  CZ  ARG A  99     -61.417  44.055   9.475  1.00  0.65           C  
ATOM    784  NH1 ARG A  99     -62.667  43.984   9.020  1.00  0.65           N  
ATOM    785  NH2 ARG A  99     -61.043  43.247  10.459  1.00  0.65           N  
ATOM    786  N   SER A 100     -55.314  45.771   6.450  1.00  0.72           N  
ATOM    787  CA  SER A 100     -55.470  45.314   5.069  1.00  0.72           C  
ATOM    788  C   SER A 100     -54.196  45.358   4.231  1.00  0.72           C  
ATOM    789  O   SER A 100     -54.231  45.039   3.042  1.00  0.72           O  
ATOM    790  CB  SER A 100     -56.495  46.192   4.287  1.00  0.72           C  
ATOM    791  OG  SER A 100     -57.758  46.240   4.951  1.00  0.72           O  
ATOM    792  N   ARG A 101     -53.017  45.720   4.789  1.00  0.71           N  
ATOM    793  CA  ARG A 101     -51.771  45.642   4.030  1.00  0.71           C  
ATOM    794  C   ARG A 101     -50.718  44.806   4.728  1.00  0.71           C  
ATOM    795  O   ARG A 101     -50.138  43.935   4.082  1.00  0.71           O  
ATOM    796  CB  ARG A 101     -51.171  47.031   3.720  1.00  0.71           C  
ATOM    797  CG  ARG A 101     -52.071  47.948   2.866  1.00  0.71           C  
ATOM    798  CD  ARG A 101     -51.950  47.878   1.333  1.00  0.71           C  
ATOM    799  NE  ARG A 101     -52.635  46.665   0.773  1.00  0.71           N  
ATOM    800  CZ  ARG A 101     -52.508  46.372  -0.533  1.00  0.71           C  
ATOM    801  NH1 ARG A 101     -52.962  45.220  -1.026  1.00  0.71           N  
ATOM    802  NH2 ARG A 101     -51.945  47.194  -1.411  1.00  0.71           N  
ATOM    803  N   LEU A 102     -50.472  44.967   6.051  1.00  0.73           N  
ATOM    804  CA  LEU A 102     -49.495  44.133   6.753  1.00  0.73           C  
ATOM    805  C   LEU A 102     -49.832  42.654   6.744  1.00  0.73           C  
ATOM    806  O   LEU A 102     -49.021  41.819   6.342  1.00  0.73           O  
ATOM    807  CB  LEU A 102     -49.348  44.513   8.240  1.00  0.73           C  
ATOM    808  CG  LEU A 102     -48.685  45.862   8.535  1.00  0.73           C  
ATOM    809  CD1 LEU A 102     -48.362  45.891  10.029  1.00  0.73           C  
ATOM    810  CD2 LEU A 102     -47.397  46.107   7.746  1.00  0.73           C  
ATOM    811  N   VAL A 103     -51.088  42.318   7.090  1.00  0.73           N  
ATOM    812  CA  VAL A 103     -51.639  40.980   7.043  1.00  0.73           C  
ATOM    813  C   VAL A 103     -51.516  40.342   5.672  1.00  0.73           C  
ATOM    814  O   VAL A 103     -51.083  39.198   5.535  1.00  0.73           O  
ATOM    815  CB  VAL A 103     -53.096  41.008   7.517  1.00  0.73           C  
ATOM    816  CG1 VAL A 103     -53.976  42.027   6.764  1.00  0.73           C  
ATOM    817  CG2 VAL A 103     -53.735  39.609   7.472  1.00  0.73           C  
ATOM    818  N   ALA A 104     -51.827  41.106   4.610  1.00  0.74           N  
ATOM    819  CA  ALA A 104     -51.670  40.695   3.239  1.00  0.74           C  
ATOM    820  C   ALA A 104     -50.210  40.502   2.838  1.00  0.74           C  
ATOM    821  O   ALA A 104     -49.854  39.498   2.228  1.00  0.74           O  
ATOM    822  CB  ALA A 104     -52.361  41.733   2.332  1.00  0.74           C  
ATOM    823  N   HIS A 105     -49.299  41.435   3.194  1.00  0.71           N  
ATOM    824  CA  HIS A 105     -47.883  41.301   2.879  1.00  0.71           C  
ATOM    825  C   HIS A 105     -47.204  40.139   3.585  1.00  0.71           C  
ATOM    826  O   HIS A 105     -46.500  39.358   2.954  1.00  0.71           O  
ATOM    827  CB  HIS A 105     -47.071  42.588   3.160  1.00  0.71           C  
ATOM    828  CG  HIS A 105     -45.767  42.631   2.410  1.00  0.71           C  
ATOM    829  ND1 HIS A 105     -44.811  43.548   2.785  1.00  0.71           N  
ATOM    830  CD2 HIS A 105     -45.335  41.920   1.331  1.00  0.71           C  
ATOM    831  CE1 HIS A 105     -43.817  43.380   1.936  1.00  0.71           C  
ATOM    832  NE2 HIS A 105     -44.081  42.407   1.035  1.00  0.71           N  
ATOM    833  N   ALA A 106     -47.452  39.961   4.898  1.00  0.75           N  
ATOM    834  CA  ALA A 106     -46.917  38.870   5.691  1.00  0.75           C  
ATOM    835  C   ALA A 106     -47.387  37.498   5.217  1.00  0.75           C  
ATOM    836  O   ALA A 106     -46.612  36.549   5.132  1.00  0.75           O  
ATOM    837  CB  ALA A 106     -47.286  39.091   7.171  1.00  0.75           C  
ATOM    838  N   TYR A 107     -48.678  37.377   4.834  1.00  0.67           N  
ATOM    839  CA  TYR A 107     -49.226  36.195   4.186  1.00  0.67           C  
ATOM    840  C   TYR A 107     -48.511  35.879   2.877  1.00  0.67           C  
ATOM    841  O   TYR A 107     -48.082  34.761   2.623  1.00  0.67           O  
ATOM    842  CB  TYR A 107     -50.742  36.480   3.942  1.00  0.67           C  
ATOM    843  CG  TYR A 107     -51.578  35.328   3.439  1.00  0.67           C  
ATOM    844  CD1 TYR A 107     -52.559  34.764   4.271  1.00  0.67           C  
ATOM    845  CD2 TYR A 107     -51.488  34.877   2.110  1.00  0.67           C  
ATOM    846  CE1 TYR A 107     -53.409  33.754   3.806  1.00  0.67           C  
ATOM    847  CE2 TYR A 107     -52.346  33.875   1.634  1.00  0.67           C  
ATOM    848  CZ  TYR A 107     -53.305  33.313   2.486  1.00  0.67           C  
ATOM    849  OH  TYR A 107     -54.181  32.314   2.022  1.00  0.67           O  
ATOM    850  N   ARG A 108     -48.327  36.889   2.015  1.00  0.65           N  
ATOM    851  CA  ARG A 108     -47.673  36.724   0.734  1.00  0.65           C  
ATOM    852  C   ARG A 108     -46.188  36.401   0.784  1.00  0.65           C  
ATOM    853  O   ARG A 108     -45.714  35.591  -0.009  1.00  0.65           O  
ATOM    854  CB  ARG A 108     -47.961  37.964  -0.133  1.00  0.65           C  
ATOM    855  CG  ARG A 108     -49.455  38.053  -0.525  1.00  0.65           C  
ATOM    856  CD  ARG A 108     -49.978  36.957  -1.459  1.00  0.65           C  
ATOM    857  NE  ARG A 108     -49.084  36.962  -2.653  1.00  0.65           N  
ATOM    858  CZ  ARG A 108     -49.337  36.310  -3.792  1.00  0.65           C  
ATOM    859  NH1 ARG A 108     -48.554  36.553  -4.837  1.00  0.65           N  
ATOM    860  NH2 ARG A 108     -50.338  35.448  -3.903  1.00  0.65           N  
ATOM    861  N   LEU A 109     -45.417  37.010   1.706  1.00  0.71           N  
ATOM    862  CA  LEU A 109     -44.018  36.671   1.913  1.00  0.71           C  
ATOM    863  C   LEU A 109     -43.806  35.257   2.442  1.00  0.71           C  
ATOM    864  O   LEU A 109     -43.014  34.486   1.901  1.00  0.71           O  
ATOM    865  CB  LEU A 109     -43.367  37.671   2.894  1.00  0.71           C  
ATOM    866  CG  LEU A 109     -43.194  39.093   2.328  1.00  0.71           C  
ATOM    867  CD1 LEU A 109     -42.896  40.067   3.471  1.00  0.71           C  
ATOM    868  CD2 LEU A 109     -42.072  39.150   1.286  1.00  0.71           C  
ATOM    869  N   TYR A 110     -44.570  34.840   3.475  1.00  0.66           N  
ATOM    870  CA  TYR A 110     -44.389  33.527   4.074  1.00  0.66           C  
ATOM    871  C   TYR A 110     -44.866  32.389   3.184  1.00  0.66           C  
ATOM    872  O   TYR A 110     -44.349  31.283   3.259  1.00  0.66           O  
ATOM    873  CB  TYR A 110     -45.108  33.418   5.445  1.00  0.66           C  
ATOM    874  CG  TYR A 110     -44.568  34.342   6.514  1.00  0.66           C  
ATOM    875  CD1 TYR A 110     -43.274  34.906   6.503  1.00  0.66           C  
ATOM    876  CD2 TYR A 110     -45.413  34.627   7.601  1.00  0.66           C  
ATOM    877  CE1 TYR A 110     -42.858  35.754   7.540  1.00  0.66           C  
ATOM    878  CE2 TYR A 110     -45.002  35.480   8.633  1.00  0.66           C  
ATOM    879  CZ  TYR A 110     -43.725  36.049   8.595  1.00  0.66           C  
ATOM    880  OH  TYR A 110     -43.328  36.922   9.623  1.00  0.66           O  
ATOM    881  N   PHE A 111     -45.822  32.640   2.268  1.00  0.64           N  
ATOM    882  CA  PHE A 111     -46.368  31.629   1.369  1.00  0.64           C  
ATOM    883  C   PHE A 111     -45.540  31.555   0.083  1.00  0.64           C  
ATOM    884  O   PHE A 111     -46.010  31.152  -0.982  1.00  0.64           O  
ATOM    885  CB  PHE A 111     -47.851  31.944   0.996  1.00  0.64           C  
ATOM    886  CG  PHE A 111     -48.868  31.580   2.062  1.00  0.64           C  
ATOM    887  CD1 PHE A 111     -48.679  31.807   3.440  1.00  0.64           C  
ATOM    888  CD2 PHE A 111     -50.094  31.027   1.647  1.00  0.64           C  
ATOM    889  CE1 PHE A 111     -49.682  31.505   4.368  1.00  0.64           C  
ATOM    890  CE2 PHE A 111     -51.088  30.692   2.574  1.00  0.64           C  
ATOM    891  CZ  PHE A 111     -50.886  30.942   3.935  1.00  0.64           C  
ATOM    892  N   SER A 112     -44.262  31.967   0.145  1.00  0.67           N  
ATOM    893  CA  SER A 112     -43.350  31.954  -0.979  1.00  0.67           C  
ATOM    894  C   SER A 112     -42.402  30.763  -0.946  1.00  0.67           C  
ATOM    895  O   SER A 112     -42.298  29.999   0.012  1.00  0.67           O  
ATOM    896  CB  SER A 112     -42.564  33.281  -1.136  1.00  0.67           C  
ATOM    897  OG  SER A 112     -41.556  33.457  -0.145  1.00  0.67           O  
ATOM    898  N   GLN A 113     -41.668  30.523  -2.050  1.00  0.58           N  
ATOM    899  CA  GLN A 113     -40.589  29.557  -2.027  1.00  0.58           C  
ATOM    900  C   GLN A 113     -39.326  30.199  -1.483  1.00  0.58           C  
ATOM    901  O   GLN A 113     -39.067  31.375  -1.710  1.00  0.58           O  
ATOM    902  CB  GLN A 113     -40.329  28.969  -3.434  1.00  0.58           C  
ATOM    903  CG  GLN A 113     -39.209  27.895  -3.507  1.00  0.58           C  
ATOM    904  CD  GLN A 113     -39.158  27.272  -4.896  1.00  0.58           C  
ATOM    905  OE1 GLN A 113     -40.107  27.410  -5.654  1.00  0.58           O  
ATOM    906  NE2 GLN A 113     -38.067  26.566  -5.252  1.00  0.58           N  
ATOM    907  N   GLN A 114     -38.470  29.412  -0.800  1.00  0.57           N  
ATOM    908  CA  GLN A 114     -37.203  29.839  -0.228  1.00  0.57           C  
ATOM    909  C   GLN A 114     -36.247  30.483  -1.241  1.00  0.57           C  
ATOM    910  O   GLN A 114     -35.457  31.359  -0.919  1.00  0.57           O  
ATOM    911  CB  GLN A 114     -36.529  28.619   0.445  1.00  0.57           C  
ATOM    912  CG  GLN A 114     -37.416  27.882   1.488  1.00  0.57           C  
ATOM    913  CD  GLN A 114     -37.750  28.735   2.718  1.00  0.57           C  
ATOM    914  OE1 GLN A 114     -37.108  29.734   3.032  1.00  0.57           O  
ATOM    915  NE2 GLN A 114     -38.788  28.300   3.470  1.00  0.57           N  
ATOM    916  N   THR A 115     -36.351  30.101  -2.528  1.00  0.55           N  
ATOM    917  CA  THR A 115     -35.701  30.733  -3.679  1.00  0.55           C  
ATOM    918  C   THR A 115     -36.066  32.206  -3.883  1.00  0.55           C  
ATOM    919  O   THR A 115     -35.315  32.962  -4.488  1.00  0.55           O  
ATOM    920  CB  THR A 115     -36.028  29.991  -4.976  1.00  0.55           C  
ATOM    921  OG1 THR A 115     -35.922  28.588  -4.783  1.00  0.55           O  
ATOM    922  CG2 THR A 115     -35.048  30.321  -6.109  1.00  0.55           C  
ATOM    923  N   TYR A 116     -37.230  32.680  -3.379  1.00  0.51           N  
ATOM    924  CA  TYR A 116     -37.620  34.083  -3.469  1.00  0.51           C  
ATOM    925  C   TYR A 116     -37.185  34.871  -2.239  1.00  0.51           C  
ATOM    926  O   TYR A 116     -37.426  36.076  -2.176  1.00  0.51           O  
ATOM    927  CB  TYR A 116     -39.171  34.277  -3.461  1.00  0.51           C  
ATOM    928  CG  TYR A 116     -39.967  33.826  -4.652  1.00  0.51           C  
ATOM    929  CD1 TYR A 116     -39.448  33.201  -5.801  1.00  0.51           C  
ATOM    930  CD2 TYR A 116     -41.348  34.084  -4.590  1.00  0.51           C  
ATOM    931  CE1 TYR A 116     -40.310  32.813  -6.839  1.00  0.51           C  
ATOM    932  CE2 TYR A 116     -42.210  33.677  -5.612  1.00  0.51           C  
ATOM    933  CZ  TYR A 116     -41.688  33.033  -6.733  1.00  0.51           C  
ATOM    934  OH  TYR A 116     -42.533  32.594  -7.764  1.00  0.51           O  
ATOM    935  N   TYR A 117     -36.563  34.228  -1.228  1.00  0.56           N  
ATOM    936  CA  TYR A 117     -36.102  34.905  -0.028  1.00  0.56           C  
ATOM    937  C   TYR A 117     -34.905  35.803  -0.343  1.00  0.56           C  
ATOM    938  O   TYR A 117     -33.810  35.352  -0.671  1.00  0.56           O  
ATOM    939  CB  TYR A 117     -35.829  33.879   1.113  1.00  0.56           C  
ATOM    940  CG  TYR A 117     -35.219  34.475   2.359  1.00  0.56           C  
ATOM    941  CD1 TYR A 117     -35.713  35.652   2.951  1.00  0.56           C  
ATOM    942  CD2 TYR A 117     -34.085  33.860   2.914  1.00  0.56           C  
ATOM    943  CE1 TYR A 117     -35.033  36.243   4.027  1.00  0.56           C  
ATOM    944  CE2 TYR A 117     -33.415  34.439   4.000  1.00  0.56           C  
ATOM    945  CZ  TYR A 117     -33.875  35.647   4.534  1.00  0.56           C  
ATOM    946  OH  TYR A 117     -33.152  36.266   5.571  1.00  0.56           O  
ATOM    947  N   ARG A 118     -35.130  37.129  -0.281  1.00  0.53           N  
ATOM    948  CA  ARG A 118     -34.141  38.123  -0.627  1.00  0.53           C  
ATOM    949  C   ARG A 118     -33.449  38.645   0.624  1.00  0.53           C  
ATOM    950  O   ARG A 118     -33.125  37.914   1.555  1.00  0.53           O  
ATOM    951  CB  ARG A 118     -34.796  39.246  -1.479  1.00  0.53           C  
ATOM    952  CG  ARG A 118     -35.275  38.717  -2.848  1.00  0.53           C  
ATOM    953  CD  ARG A 118     -36.031  39.745  -3.689  1.00  0.53           C  
ATOM    954  NE  ARG A 118     -36.331  39.086  -4.997  1.00  0.53           N  
ATOM    955  CZ  ARG A 118     -37.485  38.515  -5.357  1.00  0.53           C  
ATOM    956  NH1 ARG A 118     -37.629  38.067  -6.599  1.00  0.53           N  
ATOM    957  NH2 ARG A 118     -38.480  38.337  -4.496  1.00  0.53           N  
ATOM    958  N   VAL A 119     -33.163  39.954   0.683  1.00  0.53           N  
ATOM    959  CA  VAL A 119     -32.534  40.555   1.838  1.00  0.53           C  
ATOM    960  C   VAL A 119     -33.615  40.953   2.822  1.00  0.53           C  
ATOM    961  O   VAL A 119     -34.444  41.805   2.512  1.00  0.53           O  
ATOM    962  CB  VAL A 119     -31.719  41.782   1.438  1.00  0.53           C  
ATOM    963  CG1 VAL A 119     -31.117  42.476   2.676  1.00  0.53           C  
ATOM    964  CG2 VAL A 119     -30.593  41.343   0.482  1.00  0.53           C  
ATOM    965  N   SER A 120     -33.605  40.395   4.057  1.00  0.61           N  
ATOM    966  CA  SER A 120     -34.649  40.591   5.068  1.00  0.61           C  
ATOM    967  C   SER A 120     -34.952  42.043   5.385  1.00  0.61           C  
ATOM    968  O   SER A 120     -36.100  42.422   5.602  1.00  0.61           O  
ATOM    969  CB  SER A 120     -34.345  39.872   6.412  1.00  0.61           C  
ATOM    970  OG  SER A 120     -33.181  40.390   7.067  1.00  0.61           O  
ATOM    971  N   ASN A 121     -33.917  42.905   5.350  1.00  0.54           N  
ATOM    972  CA  ASN A 121     -34.027  44.347   5.441  1.00  0.54           C  
ATOM    973  C   ASN A 121     -34.934  44.980   4.387  1.00  0.54           C  
ATOM    974  O   ASN A 121     -35.632  45.939   4.690  1.00  0.54           O  
ATOM    975  CB  ASN A 121     -32.641  45.036   5.334  1.00  0.54           C  
ATOM    976  CG  ASN A 121     -31.774  44.640   6.522  1.00  0.54           C  
ATOM    977  OD1 ASN A 121     -32.105  44.946   7.664  1.00  0.54           O  
ATOM    978  ND2 ASN A 121     -30.626  43.974   6.262  1.00  0.54           N  
ATOM    979  N   MET A 122     -34.972  44.493   3.125  1.00  0.53           N  
ATOM    980  CA  MET A 122     -35.887  45.032   2.126  1.00  0.53           C  
ATOM    981  C   MET A 122     -37.332  44.711   2.457  1.00  0.53           C  
ATOM    982  O   MET A 122     -38.158  45.604   2.614  1.00  0.53           O  
ATOM    983  CB  MET A 122     -35.574  44.477   0.713  1.00  0.53           C  
ATOM    984  CG  MET A 122     -34.226  44.961   0.147  1.00  0.53           C  
ATOM    985  SD  MET A 122     -33.807  44.256  -1.478  1.00  0.53           S  
ATOM    986  CE  MET A 122     -35.083  45.119  -2.445  1.00  0.53           C  
ATOM    987  N   ASP A 123     -37.648  43.428   2.689  1.00  0.60           N  
ATOM    988  CA  ASP A 123     -38.970  42.960   3.053  1.00  0.60           C  
ATOM    989  C   ASP A 123     -39.434  43.520   4.399  1.00  0.60           C  
ATOM    990  O   ASP A 123     -40.600  43.837   4.627  1.00  0.60           O  
ATOM    991  CB  ASP A 123     -38.951  41.418   3.039  1.00  0.60           C  
ATOM    992  CG  ASP A 123     -38.521  40.993   1.645  1.00  0.60           C  
ATOM    993  OD1 ASP A 123     -39.340  41.156   0.710  1.00  0.60           O  
ATOM    994  OD2 ASP A 123     -37.342  40.584   1.498  1.00  0.60           O  
ATOM    995  N   GLY A 124     -38.503  43.676   5.360  1.00  0.64           N  
ATOM    996  CA  GLY A 124     -38.718  44.362   6.627  1.00  0.64           C  
ATOM    997  C   GLY A 124     -38.931  45.849   6.503  1.00  0.64           C  
ATOM    998  O   GLY A 124     -39.741  46.409   7.230  1.00  0.64           O  
ATOM    999  N   ARG A 125     -38.255  46.545   5.568  1.00  0.58           N  
ATOM   1000  CA  ARG A 125     -38.546  47.939   5.255  1.00  0.58           C  
ATOM   1001  C   ARG A 125     -39.946  48.114   4.702  1.00  0.58           C  
ATOM   1002  O   ARG A 125     -40.684  48.988   5.153  1.00  0.58           O  
ATOM   1003  CB  ARG A 125     -37.525  48.540   4.249  1.00  0.58           C  
ATOM   1004  CG  ARG A 125     -36.249  49.085   4.922  1.00  0.58           C  
ATOM   1005  CD  ARG A 125     -35.154  49.520   3.936  1.00  0.58           C  
ATOM   1006  NE  ARG A 125     -35.596  50.786   3.269  1.00  0.58           N  
ATOM   1007  CZ  ARG A 125     -35.048  51.339   2.184  1.00  0.58           C  
ATOM   1008  NH1 ARG A 125     -35.650  52.387   1.642  1.00  0.58           N  
ATOM   1009  NH2 ARG A 125     -33.913  50.897   1.661  1.00  0.58           N  
ATOM   1010  N   LEU A 126     -40.370  47.248   3.759  1.00  0.63           N  
ATOM   1011  CA  LEU A 126     -41.683  47.337   3.151  1.00  0.63           C  
ATOM   1012  C   LEU A 126     -42.836  47.198   4.153  1.00  0.63           C  
ATOM   1013  O   LEU A 126     -43.766  48.004   4.184  1.00  0.63           O  
ATOM   1014  CB  LEU A 126     -41.827  46.296   2.012  1.00  0.63           C  
ATOM   1015  CG  LEU A 126     -40.821  46.453   0.849  1.00  0.63           C  
ATOM   1016  CD1 LEU A 126     -40.992  45.317  -0.171  1.00  0.63           C  
ATOM   1017  CD2 LEU A 126     -40.909  47.815   0.151  1.00  0.63           C  
ATOM   1018  N   ARG A 127     -42.742  46.214   5.063  1.00  0.65           N  
ATOM   1019  CA  ARG A 127     -43.663  46.034   6.175  1.00  0.65           C  
ATOM   1020  C   ARG A 127     -43.623  47.168   7.210  1.00  0.65           C  
ATOM   1021  O   ARG A 127     -44.619  47.536   7.831  1.00  0.65           O  
ATOM   1022  CB  ARG A 127     -43.368  44.671   6.853  1.00  0.65           C  
ATOM   1023  CG  ARG A 127     -43.679  43.483   5.916  1.00  0.65           C  
ATOM   1024  CD  ARG A 127     -43.294  42.111   6.433  1.00  0.65           C  
ATOM   1025  NE  ARG A 127     -41.793  42.073   6.403  1.00  0.65           N  
ATOM   1026  CZ  ARG A 127     -41.184  40.940   6.784  1.00  0.65           C  
ATOM   1027  NH1 ARG A 127     -39.899  40.716   6.434  1.00  0.65           N  
ATOM   1028  NH2 ARG A 127     -41.834  39.910   7.307  1.00  0.65           N  
ATOM   1029  N   ASN A 128     -42.442  47.763   7.455  1.00  0.70           N  
ATOM   1030  CA  ASN A 128     -42.294  48.900   8.353  1.00  0.70           C  
ATOM   1031  C   ASN A 128     -42.526  50.251   7.619  1.00  0.70           C  
ATOM   1032  O   ASN A 128     -43.446  50.264   6.798  1.00  0.70           O  
ATOM   1033  CB  ASN A 128     -41.013  48.699   9.196  1.00  0.70           C  
ATOM   1034  CG  ASN A 128     -41.221  47.482  10.089  1.00  0.70           C  
ATOM   1035  OD1 ASN A 128     -42.121  47.498  10.931  1.00  0.70           O  
ATOM   1036  ND2 ASN A 128     -40.378  46.443   9.929  1.00  0.70           N  
ATOM   1037  N   PRO A 129     -41.910  51.441   7.790  1.00  0.67           N  
ATOM   1038  CA  PRO A 129     -42.566  52.652   7.302  1.00  0.67           C  
ATOM   1039  C   PRO A 129     -42.115  53.046   5.919  1.00  0.67           C  
ATOM   1040  O   PRO A 129     -42.540  54.097   5.456  1.00  0.67           O  
ATOM   1041  CB  PRO A 129     -42.138  53.728   8.313  1.00  0.67           C  
ATOM   1042  CG  PRO A 129     -40.737  53.295   8.724  1.00  0.67           C  
ATOM   1043  CD  PRO A 129     -40.900  51.782   8.799  1.00  0.67           C  
ATOM   1044  N   ASP A 130     -41.290  52.242   5.226  1.00  0.68           N  
ATOM   1045  CA  ASP A 130     -40.829  52.551   3.884  1.00  0.68           C  
ATOM   1046  C   ASP A 130     -41.990  52.559   2.892  1.00  0.68           C  
ATOM   1047  O   ASP A 130     -42.192  53.467   2.087  1.00  0.68           O  
ATOM   1048  CB  ASP A 130     -39.825  51.436   3.504  1.00  0.68           C  
ATOM   1049  CG  ASP A 130     -38.636  51.924   2.719  1.00  0.68           C  
ATOM   1050  OD1 ASP A 130     -37.719  52.510   3.351  1.00  0.68           O  
ATOM   1051  OD2 ASP A 130     -38.521  51.621   1.509  1.00  0.68           O  
ATOM   1052  N   GLN A 131     -42.831  51.516   2.998  1.00  0.68           N  
ATOM   1053  CA  GLN A 131     -43.898  51.245   2.068  1.00  0.68           C  
ATOM   1054  C   GLN A 131     -45.235  51.327   2.774  1.00  0.68           C  
ATOM   1055  O   GLN A 131     -46.063  52.170   2.434  1.00  0.68           O  
ATOM   1056  CB  GLN A 131     -43.613  49.875   1.403  1.00  0.68           C  
ATOM   1057  CG  GLN A 131     -44.594  49.313   0.354  1.00  0.68           C  
ATOM   1058  CD  GLN A 131     -45.944  48.957   0.971  1.00  0.68           C  
ATOM   1059  OE1 GLN A 131     -46.035  48.089   1.839  1.00  0.68           O  
ATOM   1060  NE2 GLN A 131     -47.001  49.654   0.506  1.00  0.68           N  
ATOM   1061  N   SER A 132     -45.497  50.455   3.772  1.00  0.72           N  
ATOM   1062  CA  SER A 132     -46.818  50.310   4.381  1.00  0.72           C  
ATOM   1063  C   SER A 132     -47.332  51.541   5.101  1.00  0.72           C  
ATOM   1064  O   SER A 132     -48.526  51.798   5.068  1.00  0.72           O  
ATOM   1065  CB  SER A 132     -46.911  49.083   5.318  1.00  0.72           C  
ATOM   1066  OG  SER A 132     -47.065  47.881   4.561  1.00  0.72           O  
ATOM   1067  N   LEU A 133     -46.434  52.357   5.709  1.00  0.68           N  
ATOM   1068  CA  LEU A 133     -46.789  53.634   6.336  1.00  0.68           C  
ATOM   1069  C   LEU A 133     -46.683  54.811   5.348  1.00  0.68           C  
ATOM   1070  O   LEU A 133     -46.679  55.987   5.703  1.00  0.68           O  
ATOM   1071  CB  LEU A 133     -45.894  53.903   7.576  1.00  0.68           C  
ATOM   1072  CG  LEU A 133     -46.389  54.974   8.579  1.00  0.68           C  
ATOM   1073  CD1 LEU A 133     -47.727  54.623   9.240  1.00  0.68           C  
ATOM   1074  CD2 LEU A 133     -45.321  55.260   9.643  1.00  0.68           C  
ATOM   1075  N   THR A 134     -46.586  54.509   4.042  1.00  0.69           N  
ATOM   1076  CA  THR A 134     -46.647  55.515   2.987  1.00  0.69           C  
ATOM   1077  C   THR A 134     -47.922  55.306   2.190  1.00  0.69           C  
ATOM   1078  O   THR A 134     -48.594  56.252   1.793  1.00  0.69           O  
ATOM   1079  CB  THR A 134     -45.461  55.418   2.028  1.00  0.69           C  
ATOM   1080  OG1 THR A 134     -44.241  55.651   2.717  1.00  0.69           O  
ATOM   1081  CG2 THR A 134     -45.538  56.486   0.927  1.00  0.69           C  
ATOM   1082  N   GLU A 135     -48.321  54.042   1.940  1.00  0.68           N  
ATOM   1083  CA  GLU A 135     -49.555  53.710   1.240  1.00  0.68           C  
ATOM   1084  C   GLU A 135     -50.830  54.040   2.012  1.00  0.68           C  
ATOM   1085  O   GLU A 135     -51.827  54.488   1.448  1.00  0.68           O  
ATOM   1086  CB  GLU A 135     -49.551  52.216   0.850  1.00  0.68           C  
ATOM   1087  CG  GLU A 135     -50.723  51.797  -0.076  1.00  0.68           C  
ATOM   1088  CD  GLU A 135     -50.625  50.346  -0.520  1.00  0.68           C  
ATOM   1089  OE1 GLU A 135     -49.632  49.670  -0.166  1.00  0.68           O  
ATOM   1090  OE2 GLU A 135     -51.571  49.862  -1.188  1.00  0.68           O  
ATOM   1091  N   ASP A 136     -50.837  53.823   3.342  1.00  0.72           N  
ATOM   1092  CA  ASP A 136     -51.968  54.133   4.189  1.00  0.72           C  
ATOM   1093  C   ASP A 136     -52.297  55.612   4.306  1.00  0.72           C  
ATOM   1094  O   ASP A 136     -53.448  56.018   4.144  1.00  0.72           O  
ATOM   1095  CB  ASP A 136     -51.780  53.481   5.588  1.00  0.72           C  
ATOM   1096  CG  ASP A 136     -50.509  53.887   6.327  1.00  0.72           C  
ATOM   1097  OD1 ASP A 136     -49.686  54.632   5.748  1.00  0.72           O  
ATOM   1098  OD2 ASP A 136     -50.346  53.445   7.494  1.00  0.72           O  
ATOM   1099  N   VAL A 137     -51.277  56.444   4.569  1.00  0.72           N  
ATOM   1100  CA  VAL A 137     -51.372  57.884   4.663  1.00  0.72           C  
ATOM   1101  C   VAL A 137     -51.688  58.551   3.337  1.00  0.72           C  
ATOM   1102  O   VAL A 137     -52.442  59.526   3.292  1.00  0.72           O  
ATOM   1103  CB  VAL A 137     -50.200  58.541   5.394  1.00  0.72           C  
ATOM   1104  CG1 VAL A 137     -50.005  57.866   6.766  1.00  0.72           C  
ATOM   1105  CG2 VAL A 137     -48.888  58.457   4.600  1.00  0.72           C  
ATOM   1106  N   VAL A 138     -51.150  58.024   2.215  1.00  0.71           N  
ATOM   1107  CA  VAL A 138     -51.369  58.561   0.882  1.00  0.71           C  
ATOM   1108  C   VAL A 138     -52.376  57.753   0.081  1.00  0.71           C  
ATOM   1109  O   VAL A 138     -52.059  56.983  -0.824  1.00  0.71           O  
ATOM   1110  CB  VAL A 138     -50.099  58.701   0.070  1.00  0.71           C  
ATOM   1111  CG1 VAL A 138     -50.377  59.543  -1.195  1.00  0.71           C  
ATOM   1112  CG2 VAL A 138     -48.974  59.357   0.890  1.00  0.71           C  
ATOM   1113  N   ALA A 139     -53.664  57.975   0.366  1.00  0.65           N  
ATOM   1114  CA  ALA A 139     -54.739  57.438  -0.423  1.00  0.65           C  
ATOM   1115  C   ALA A 139     -55.924  58.352  -0.157  1.00  0.65           C  
ATOM   1116  O   ALA A 139     -55.856  59.199   0.727  1.00  0.65           O  
ATOM   1117  CB  ALA A 139     -54.996  55.961  -0.062  1.00  0.65           C  
ATOM   1118  N   PHE A 140     -57.027  58.272  -0.934  1.00  0.61           N  
ATOM   1119  CA  PHE A 140     -58.067  59.304  -0.932  1.00  0.61           C  
ATOM   1120  C   PHE A 140     -58.767  59.559   0.417  1.00  0.61           C  
ATOM   1121  O   PHE A 140     -58.976  60.697   0.826  1.00  0.61           O  
ATOM   1122  CB  PHE A 140     -59.087  58.991  -2.045  1.00  0.61           C  
ATOM   1123  CG  PHE A 140     -60.142  60.047  -2.244  1.00  0.61           C  
ATOM   1124  CD1 PHE A 140     -59.851  61.239  -2.926  1.00  0.61           C  
ATOM   1125  CD2 PHE A 140     -61.444  59.839  -1.757  1.00  0.61           C  
ATOM   1126  CE1 PHE A 140     -60.847  62.204  -3.125  1.00  0.61           C  
ATOM   1127  CE2 PHE A 140     -62.441  60.802  -1.953  1.00  0.61           C  
ATOM   1128  CZ  PHE A 140     -62.142  61.983  -2.641  1.00  0.61           C  
ATOM   1129  N   ALA A 141     -59.109  58.504   1.177  1.00  0.69           N  
ATOM   1130  CA  ALA A 141     -59.668  58.657   2.509  1.00  0.69           C  
ATOM   1131  C   ALA A 141     -58.583  58.471   3.569  1.00  0.69           C  
ATOM   1132  O   ALA A 141     -58.606  57.543   4.383  1.00  0.69           O  
ATOM   1133  CB  ALA A 141     -60.862  57.704   2.708  1.00  0.69           C  
ATOM   1134  N   ALA A 142     -57.587  59.375   3.545  1.00  0.73           N  
ATOM   1135  CA  ALA A 142     -56.426  59.359   4.401  1.00  0.73           C  
ATOM   1136  C   ALA A 142     -55.856  60.769   4.514  1.00  0.73           C  
ATOM   1137  O   ALA A 142     -56.344  61.699   3.874  1.00  0.73           O  
ATOM   1138  CB  ALA A 142     -55.361  58.414   3.834  1.00  0.73           C  
ATOM   1139  N   SER A 143     -54.828  60.988   5.366  1.00  0.74           N  
ATOM   1140  CA  SER A 143     -54.342  62.326   5.711  1.00  0.74           C  
ATOM   1141  C   SER A 143     -53.797  63.139   4.561  1.00  0.74           C  
ATOM   1142  O   SER A 143     -54.095  64.320   4.433  1.00  0.74           O  
ATOM   1143  CB  SER A 143     -53.268  62.349   6.835  1.00  0.74           C  
ATOM   1144  OG  SER A 143     -52.087  61.624   6.488  1.00  0.74           O  
ATOM   1145  N   VAL A 144     -53.004  62.536   3.670  1.00  0.73           N  
ATOM   1146  CA  VAL A 144     -52.420  63.224   2.538  1.00  0.73           C  
ATOM   1147  C   VAL A 144     -53.450  63.677   1.509  1.00  0.73           C  
ATOM   1148  O   VAL A 144     -53.382  64.778   0.965  1.00  0.73           O  
ATOM   1149  CB  VAL A 144     -51.303  62.359   1.997  1.00  0.73           C  
ATOM   1150  CG1 VAL A 144     -50.871  62.757   0.587  1.00  0.73           C  
ATOM   1151  CG2 VAL A 144     -50.132  62.460   2.996  1.00  0.73           C  
ATOM   1152  N   ALA A 145     -54.489  62.874   1.232  1.00  0.74           N  
ATOM   1153  CA  ALA A 145     -55.565  63.333   0.377  1.00  0.74           C  
ATOM   1154  C   ALA A 145     -56.576  64.250   1.057  1.00  0.74           C  
ATOM   1155  O   ALA A 145     -57.204  65.082   0.400  1.00  0.74           O  
ATOM   1156  CB  ALA A 145     -56.285  62.124  -0.183  1.00  0.74           C  
ATOM   1157  N   HIS A 146     -56.706  64.184   2.403  1.00  0.74           N  
ATOM   1158  CA  HIS A 146     -57.366  65.207   3.208  1.00  0.74           C  
ATOM   1159  C   HIS A 146     -56.660  66.531   3.058  1.00  0.74           C  
ATOM   1160  O   HIS A 146     -57.300  67.558   2.840  1.00  0.74           O  
ATOM   1161  CB  HIS A 146     -57.381  64.823   4.705  1.00  0.74           C  
ATOM   1162  CG  HIS A 146     -57.788  65.892   5.682  1.00  0.74           C  
ATOM   1163  ND1 HIS A 146     -58.976  66.580   5.536  1.00  0.74           N  
ATOM   1164  CD2 HIS A 146     -57.173  66.265   6.834  1.00  0.74           C  
ATOM   1165  CE1 HIS A 146     -59.069  67.340   6.603  1.00  0.74           C  
ATOM   1166  NE2 HIS A 146     -58.001  67.196   7.421  1.00  0.74           N  
ATOM   1167  N   LEU A 147     -55.302  66.522   3.079  1.00  0.73           N  
ATOM   1168  CA  LEU A 147     -54.519  67.674   2.674  1.00  0.73           C  
ATOM   1169  C   LEU A 147     -54.924  68.158   1.296  1.00  0.73           C  
ATOM   1170  O   LEU A 147     -55.567  69.189   1.245  1.00  0.73           O  
ATOM   1171  CB  LEU A 147     -52.982  67.483   2.782  1.00  0.73           C  
ATOM   1172  CG  LEU A 147     -52.473  67.271   4.223  1.00  0.73           C  
ATOM   1173  CD1 LEU A 147     -51.019  66.781   4.218  1.00  0.73           C  
ATOM   1174  CD2 LEU A 147     -52.581  68.535   5.087  1.00  0.73           C  
ATOM   1175  N   TYR A 148     -54.733  67.404   0.181  1.00  0.70           N  
ATOM   1176  CA  TYR A 148     -55.013  67.884  -1.181  1.00  0.70           C  
ATOM   1177  C   TYR A 148     -56.427  68.361  -1.422  1.00  0.70           C  
ATOM   1178  O   TYR A 148     -56.663  69.344  -2.123  1.00  0.70           O  
ATOM   1179  CB  TYR A 148     -54.731  66.792  -2.237  1.00  0.70           C  
ATOM   1180  CG  TYR A 148     -54.475  67.321  -3.633  1.00  0.70           C  
ATOM   1181  CD1 TYR A 148     -53.442  68.246  -3.861  1.00  0.70           C  
ATOM   1182  CD2 TYR A 148     -55.169  66.804  -4.742  1.00  0.70           C  
ATOM   1183  CE1 TYR A 148     -53.067  68.595  -5.166  1.00  0.70           C  
ATOM   1184  CE2 TYR A 148     -54.837  67.203  -6.047  1.00  0.70           C  
ATOM   1185  CZ  TYR A 148     -53.771  68.084  -6.258  1.00  0.70           C  
ATOM   1186  OH  TYR A 148     -53.391  68.442  -7.568  1.00  0.70           O  
ATOM   1187  N   SER A 149     -57.409  67.695  -0.800  1.00  0.78           N  
ATOM   1188  CA  SER A 149     -58.805  68.093  -0.800  1.00  0.78           C  
ATOM   1189  C   SER A 149     -59.012  69.477  -0.238  1.00  0.78           C  
ATOM   1190  O   SER A 149     -59.844  70.236  -0.725  1.00  0.78           O  
ATOM   1191  CB  SER A 149     -59.664  67.148   0.060  1.00  0.78           C  
ATOM   1192  OG  SER A 149     -59.753  65.872  -0.562  1.00  0.78           O  
ATOM   1193  N   ASN A 150     -58.226  69.844   0.781  1.00  0.74           N  
ATOM   1194  CA  ASN A 150     -58.257  71.142   1.418  1.00  0.74           C  
ATOM   1195  C   ASN A 150     -57.224  72.099   0.854  1.00  0.74           C  
ATOM   1196  O   ASN A 150     -57.012  73.166   1.417  1.00  0.74           O  
ATOM   1197  CB  ASN A 150     -57.979  71.014   2.924  1.00  0.74           C  
ATOM   1198  CG  ASN A 150     -59.116  70.240   3.561  1.00  0.74           C  
ATOM   1199  OD1 ASN A 150     -60.237  70.126   3.053  1.00  0.74           O  
ATOM   1200  ND2 ASN A 150     -58.808  69.655   4.738  1.00  0.74           N  
ATOM   1201  N   LEU A 151     -56.585  71.784  -0.289  1.00  0.67           N  
ATOM   1202  CA  LEU A 151     -55.703  72.729  -0.965  1.00  0.67           C  
ATOM   1203  C   LEU A 151     -56.215  72.971  -2.361  1.00  0.67           C  
ATOM   1204  O   LEU A 151     -56.130  74.068  -2.887  1.00  0.67           O  
ATOM   1205  CB  LEU A 151     -54.252  72.211  -1.137  1.00  0.67           C  
ATOM   1206  CG  LEU A 151     -53.747  71.343   0.014  1.00  0.67           C  
ATOM   1207  CD1 LEU A 151     -52.480  70.570  -0.339  1.00  0.67           C  
ATOM   1208  CD2 LEU A 151     -53.633  72.064   1.360  1.00  0.67           C  
ATOM   1209  N   THR A 152     -56.783  71.933  -3.010  1.00  0.71           N  
ATOM   1210  CA  THR A 152     -57.412  72.033  -4.326  1.00  0.71           C  
ATOM   1211  C   THR A 152     -58.684  72.839  -4.256  1.00  0.71           C  
ATOM   1212  O   THR A 152     -58.896  73.738  -5.065  1.00  0.71           O  
ATOM   1213  CB  THR A 152     -57.740  70.686  -4.966  1.00  0.71           C  
ATOM   1214  OG1 THR A 152     -56.560  69.908  -5.093  1.00  0.71           O  
ATOM   1215  CG2 THR A 152     -58.287  70.856  -6.395  1.00  0.71           C  
ATOM   1216  N   LYS A 153     -59.557  72.579  -3.247  1.00  0.71           N  
ATOM   1217  CA  LYS A 153     -60.743  73.400  -3.039  1.00  0.71           C  
ATOM   1218  C   LYS A 153     -60.368  74.839  -2.653  1.00  0.71           C  
ATOM   1219  O   LYS A 153     -60.808  75.741  -3.354  1.00  0.71           O  
ATOM   1220  CB  LYS A 153     -61.740  72.767  -2.023  1.00  0.71           C  
ATOM   1221  CG  LYS A 153     -62.338  71.398  -2.392  1.00  0.71           C  
ATOM   1222  CD  LYS A 153     -62.963  70.744  -1.138  1.00  0.71           C  
ATOM   1223  CE  LYS A 153     -63.110  69.219  -1.219  1.00  0.71           C  
ATOM   1224  NZ  LYS A 153     -63.339  68.656   0.136  1.00  0.71           N  
ATOM   1225  N   PRO A 154     -59.505  75.153  -1.683  1.00  0.75           N  
ATOM   1226  CA  PRO A 154     -58.964  76.491  -1.545  1.00  0.75           C  
ATOM   1227  C   PRO A 154     -58.177  77.060  -2.705  1.00  0.75           C  
ATOM   1228  O   PRO A 154     -58.280  78.258  -2.873  1.00  0.75           O  
ATOM   1229  CB  PRO A 154     -58.171  76.443  -0.238  1.00  0.75           C  
ATOM   1230  CG  PRO A 154     -59.010  75.515   0.618  1.00  0.75           C  
ATOM   1231  CD  PRO A 154     -59.441  74.460  -0.399  1.00  0.75           C  
ATOM   1232  N   LEU A 155     -57.380  76.347  -3.530  1.00  0.68           N  
ATOM   1233  CA  LEU A 155     -56.749  76.981  -4.691  1.00  0.68           C  
ATOM   1234  C   LEU A 155     -57.782  77.452  -5.684  1.00  0.68           C  
ATOM   1235  O   LEU A 155     -57.719  78.574  -6.183  1.00  0.68           O  
ATOM   1236  CB  LEU A 155     -55.719  76.094  -5.445  1.00  0.68           C  
ATOM   1237  CG  LEU A 155     -55.088  76.748  -6.709  1.00  0.68           C  
ATOM   1238  CD1 LEU A 155     -54.438  78.118  -6.455  1.00  0.68           C  
ATOM   1239  CD2 LEU A 155     -54.029  75.832  -7.329  1.00  0.68           C  
ATOM   1240  N   LEU A 156     -58.802  76.612  -5.942  1.00  0.70           N  
ATOM   1241  CA  LEU A 156     -59.949  76.999  -6.727  1.00  0.70           C  
ATOM   1242  C   LEU A 156     -60.688  78.182  -6.118  1.00  0.70           C  
ATOM   1243  O   LEU A 156     -60.761  79.238  -6.738  1.00  0.70           O  
ATOM   1244  CB  LEU A 156     -60.885  75.773  -6.845  1.00  0.70           C  
ATOM   1245  CG  LEU A 156     -62.185  75.979  -7.648  1.00  0.70           C  
ATOM   1246  CD1 LEU A 156     -61.913  76.360  -9.110  1.00  0.70           C  
ATOM   1247  CD2 LEU A 156     -63.045  74.710  -7.567  1.00  0.70           C  
ATOM   1248  N   ASP A 157     -61.144  78.068  -4.854  1.00  0.74           N  
ATOM   1249  CA  ASP A 157     -61.908  79.078  -4.153  1.00  0.74           C  
ATOM   1250  C   ASP A 157     -61.112  80.387  -3.936  1.00  0.74           C  
ATOM   1251  O   ASP A 157     -61.629  81.474  -4.161  1.00  0.74           O  
ATOM   1252  CB  ASP A 157     -62.482  78.486  -2.821  1.00  0.74           C  
ATOM   1253  CG  ASP A 157     -63.491  77.336  -2.988  1.00  0.74           C  
ATOM   1254  OD1 ASP A 157     -63.928  77.056  -4.130  1.00  0.74           O  
ATOM   1255  OD2 ASP A 157     -63.867  76.719  -1.948  1.00  0.74           O  
ATOM   1256  N   VAL A 158     -59.817  80.340  -3.547  1.00  0.76           N  
ATOM   1257  CA  VAL A 158     -58.922  81.495  -3.407  1.00  0.76           C  
ATOM   1258  C   VAL A 158     -58.575  82.180  -4.716  1.00  0.76           C  
ATOM   1259  O   VAL A 158     -58.547  83.407  -4.797  1.00  0.76           O  
ATOM   1260  CB  VAL A 158     -57.625  81.168  -2.658  1.00  0.76           C  
ATOM   1261  CG1 VAL A 158     -56.606  82.321  -2.669  1.00  0.76           C  
ATOM   1262  CG2 VAL A 158     -57.979  80.872  -1.193  1.00  0.76           C  
ATOM   1263  N   ALA A 159     -58.296  81.439  -5.810  1.00  0.75           N  
ATOM   1264  CA  ALA A 159     -58.109  82.049  -7.118  1.00  0.75           C  
ATOM   1265  C   ALA A 159     -59.377  82.741  -7.599  1.00  0.75           C  
ATOM   1266  O   ALA A 159     -59.351  83.862  -8.099  1.00  0.75           O  
ATOM   1267  CB  ALA A 159     -57.656  80.998  -8.147  1.00  0.75           C  
ATOM   1268  N   VAL A 160     -60.530  82.096  -7.362  1.00  0.69           N  
ATOM   1269  CA  VAL A 160     -61.865  82.622  -7.566  1.00  0.69           C  
ATOM   1270  C   VAL A 160     -62.129  83.892  -6.751  1.00  0.69           C  
ATOM   1271  O   VAL A 160     -62.575  84.889  -7.304  1.00  0.69           O  
ATOM   1272  CB  VAL A 160     -62.832  81.464  -7.306  1.00  0.69           C  
ATOM   1273  CG1 VAL A 160     -64.280  81.835  -6.971  1.00  0.69           C  
ATOM   1274  CG2 VAL A 160     -62.820  80.547  -8.548  1.00  0.69           C  
ATOM   1275  N   THR A 161     -61.761  83.966  -5.453  1.00  0.70           N  
ATOM   1276  CA  THR A 161     -61.957  85.175  -4.639  1.00  0.70           C  
ATOM   1277  C   THR A 161     -60.870  86.224  -4.842  1.00  0.70           C  
ATOM   1278  O   THR A 161     -60.932  87.326  -4.296  1.00  0.70           O  
ATOM   1279  CB  THR A 161     -62.043  84.918  -3.131  1.00  0.70           C  
ATOM   1280  OG1 THR A 161     -60.888  84.252  -2.636  1.00  0.70           O  
ATOM   1281  CG2 THR A 161     -63.251  84.030  -2.810  1.00  0.70           C  
ATOM   1282  N   SER A 162     -59.842  85.926  -5.658  1.00  0.75           N  
ATOM   1283  CA  SER A 162     -58.818  86.886  -6.064  1.00  0.75           C  
ATOM   1284  C   SER A 162     -59.132  87.459  -7.435  1.00  0.75           C  
ATOM   1285  O   SER A 162     -58.382  88.265  -7.987  1.00  0.75           O  
ATOM   1286  CB  SER A 162     -57.407  86.253  -6.161  1.00  0.75           C  
ATOM   1287  OG  SER A 162     -57.008  85.692  -4.911  1.00  0.75           O  
ATOM   1288  N   TYR A 163     -60.284  87.072  -8.006  1.00  0.58           N  
ATOM   1289  CA  TYR A 163     -60.801  87.564  -9.258  1.00  0.58           C  
ATOM   1290  C   TYR A 163     -62.181  88.139  -8.988  1.00  0.58           C  
ATOM   1291  O   TYR A 163     -62.856  87.806  -8.022  1.00  0.58           O  
ATOM   1292  CB  TYR A 163     -60.955  86.427 -10.313  1.00  0.58           C  
ATOM   1293  CG  TYR A 163     -59.654  85.841 -10.816  1.00  0.58           C  
ATOM   1294  CD1 TYR A 163     -58.506  86.619 -11.058  1.00  0.58           C  
ATOM   1295  CD2 TYR A 163     -59.611  84.469 -11.130  1.00  0.58           C  
ATOM   1296  CE1 TYR A 163     -57.346  86.032 -11.588  1.00  0.58           C  
ATOM   1297  CE2 TYR A 163     -58.450  83.882 -11.653  1.00  0.58           C  
ATOM   1298  CZ  TYR A 163     -57.317  84.669 -11.883  1.00  0.58           C  
ATOM   1299  OH  TYR A 163     -56.145  84.105 -12.426  1.00  0.58           O  
ATOM   1300  N   THR A 164     -62.645  89.058  -9.852  1.00  0.48           N  
ATOM   1301  CA  THR A 164     -63.995  89.616  -9.788  1.00  0.48           C  
ATOM   1302  C   THR A 164     -65.096  88.619 -10.093  1.00  0.48           C  
ATOM   1303  O   THR A 164     -66.172  88.675  -9.500  1.00  0.48           O  
ATOM   1304  CB  THR A 164     -64.147  90.799 -10.726  1.00  0.48           C  
ATOM   1305  OG1 THR A 164     -63.238  91.819 -10.359  1.00  0.48           O  
ATOM   1306  CG2 THR A 164     -65.539  91.433 -10.684  1.00  0.48           C  
ATOM   1307  N   LEU A 165     -64.844  87.681 -11.038  1.00  0.37           N  
ATOM   1308  CA  LEU A 165     -65.812  86.699 -11.512  1.00  0.37           C  
ATOM   1309  C   LEU A 165     -67.082  87.310 -12.097  1.00  0.37           C  
ATOM   1310  O   LEU A 165     -67.053  88.191 -12.953  1.00  0.37           O  
ATOM   1311  CB  LEU A 165     -66.213  85.691 -10.402  1.00  0.37           C  
ATOM   1312  CG  LEU A 165     -65.068  85.056  -9.616  1.00  0.37           C  
ATOM   1313  CD1 LEU A 165     -65.661  84.612  -8.276  1.00  0.37           C  
ATOM   1314  CD2 LEU A 165     -64.422  83.894 -10.380  1.00  0.37           C  
ATOM   1315  N   LEU A 166     -68.236  86.817 -11.624  1.00  0.23           N  
ATOM   1316  CA  LEU A 166     -69.545  87.310 -11.915  1.00  0.23           C  
ATOM   1317  C   LEU A 166     -70.324  87.162 -10.630  1.00  0.23           C  
ATOM   1318  O   LEU A 166     -70.019  86.320  -9.786  1.00  0.23           O  
ATOM   1319  CB  LEU A 166     -70.216  86.534 -13.081  1.00  0.23           C  
ATOM   1320  CG  LEU A 166     -70.395  85.006 -12.892  1.00  0.23           C  
ATOM   1321  CD1 LEU A 166     -71.694  84.621 -12.162  1.00  0.23           C  
ATOM   1322  CD2 LEU A 166     -70.377  84.304 -14.256  1.00  0.23           C  
ATOM   1323  N   ARG A 167     -71.343  88.005 -10.440  1.00  0.28           N  
ATOM   1324  CA  ARG A 167     -72.237  87.940  -9.315  1.00  0.28           C  
ATOM   1325  C   ARG A 167     -73.409  88.790  -9.764  1.00  0.28           C  
ATOM   1326  O   ARG A 167     -73.268  89.573 -10.702  1.00  0.28           O  
ATOM   1327  CB  ARG A 167     -71.529  88.466  -8.036  1.00  0.28           C  
ATOM   1328  CG  ARG A 167     -72.383  88.663  -6.768  1.00  0.28           C  
ATOM   1329  CD  ARG A 167     -72.910  87.384  -6.128  1.00  0.28           C  
ATOM   1330  NE  ARG A 167     -73.840  87.839  -5.046  1.00  0.28           N  
ATOM   1331  CZ  ARG A 167     -74.370  87.031  -4.120  1.00  0.28           C  
ATOM   1332  NH1 ARG A 167     -75.210  87.543  -3.226  1.00  0.28           N  
ATOM   1333  NH2 ARG A 167     -74.082  85.733  -4.081  1.00  0.28           N  
ATOM   1334  N   ALA A 168     -74.608  88.638  -9.163  1.00  0.33           N  
ATOM   1335  CA  ALA A 168     -75.789  89.374  -9.572  1.00  0.33           C  
ATOM   1336  C   ALA A 168     -75.638  90.896  -9.467  1.00  0.33           C  
ATOM   1337  O   ALA A 168     -75.157  91.421  -8.466  1.00  0.33           O  
ATOM   1338  CB  ALA A 168     -76.999  88.886  -8.756  1.00  0.33           C  
ATOM   1339  N   ALA A 169     -76.051  91.622 -10.530  1.00  0.37           N  
ATOM   1340  CA  ALA A 169     -75.578  92.949 -10.899  1.00  0.37           C  
ATOM   1341  C   ALA A 169     -75.381  94.002  -9.804  1.00  0.37           C  
ATOM   1342  O   ALA A 169     -74.272  94.475  -9.579  1.00  0.37           O  
ATOM   1343  CB  ALA A 169     -76.544  93.504 -11.965  1.00  0.37           C  
ATOM   1344  N   ARG A 170     -76.449  94.367  -9.066  1.00  0.37           N  
ATOM   1345  CA  ARG A 170     -76.342  95.297  -7.951  1.00  0.37           C  
ATOM   1346  C   ARG A 170     -76.363  94.571  -6.609  1.00  0.37           C  
ATOM   1347  O   ARG A 170     -76.256  95.188  -5.553  1.00  0.37           O  
ATOM   1348  CB  ARG A 170     -77.517  96.310  -7.942  1.00  0.37           C  
ATOM   1349  CG  ARG A 170     -77.556  97.294  -9.131  1.00  0.37           C  
ATOM   1350  CD  ARG A 170     -78.713  98.292  -8.984  1.00  0.37           C  
ATOM   1351  NE  ARG A 170     -78.687  99.239 -10.148  1.00  0.37           N  
ATOM   1352  CZ  ARG A 170     -79.627 100.171 -10.365  1.00  0.37           C  
ATOM   1353  NH1 ARG A 170     -79.511 101.001 -11.400  1.00  0.37           N  
ATOM   1354  NH2 ARG A 170     -80.684 100.295  -9.568  1.00  0.37           N  
ATOM   1355  N   SER A 171     -76.472  93.226  -6.596  1.00  0.43           N  
ATOM   1356  CA  SER A 171     -76.711  92.438  -5.384  1.00  0.43           C  
ATOM   1357  C   SER A 171     -75.385  91.989  -4.806  1.00  0.43           C  
ATOM   1358  O   SER A 171     -75.047  90.802  -4.710  1.00  0.43           O  
ATOM   1359  CB  SER A 171     -77.642  91.226  -5.630  1.00  0.43           C  
ATOM   1360  OG  SER A 171     -78.058  90.612  -4.406  1.00  0.43           O  
ATOM   1361  N   ARG A 172     -74.574  93.014  -4.467  1.00  0.46           N  
ATOM   1362  CA  ARG A 172     -73.184  92.912  -4.076  1.00  0.46           C  
ATOM   1363  C   ARG A 172     -72.347  92.239  -5.148  1.00  0.46           C  
ATOM   1364  O   ARG A 172     -71.632  91.274  -4.896  1.00  0.46           O  
ATOM   1365  CB  ARG A 172     -73.001  92.306  -2.662  1.00  0.46           C  
ATOM   1366  CG  ARG A 172     -73.681  93.173  -1.579  1.00  0.46           C  
ATOM   1367  CD  ARG A 172     -73.515  92.690  -0.129  1.00  0.46           C  
ATOM   1368  NE  ARG A 172     -72.048  92.553   0.177  1.00  0.46           N  
ATOM   1369  CZ  ARG A 172     -71.184  93.572   0.292  1.00  0.46           C  
ATOM   1370  NH1 ARG A 172     -69.882  93.312   0.375  1.00  0.46           N  
ATOM   1371  NH2 ARG A 172     -71.575  94.840   0.326  1.00  0.46           N  
ATOM   1372  N   GLY A 173     -72.474  92.753  -6.392  1.00  0.45           N  
ATOM   1373  CA  GLY A 173     -71.797  92.258  -7.580  1.00  0.45           C  
ATOM   1374  C   GLY A 173     -70.405  92.795  -7.749  1.00  0.45           C  
ATOM   1375  O   GLY A 173     -69.674  93.023  -6.791  1.00  0.45           O  
ATOM   1376  N   ALA A 174     -69.993  93.066  -9.000  1.00  0.46           N  
ATOM   1377  CA  ALA A 174     -68.659  93.536  -9.338  1.00  0.46           C  
ATOM   1378  C   ALA A 174     -68.386  95.006  -8.986  1.00  0.46           C  
ATOM   1379  O   ALA A 174     -67.538  95.664  -9.582  1.00  0.46           O  
ATOM   1380  CB  ALA A 174     -68.442  93.313 -10.846  1.00  0.46           C  
ATOM   1381  N   GLY A 175     -69.095  95.522  -7.962  1.00  0.52           N  
ATOM   1382  CA  GLY A 175     -68.853  96.797  -7.313  1.00  0.52           C  
ATOM   1383  C   GLY A 175     -68.025  96.532  -6.091  1.00  0.52           C  
ATOM   1384  O   GLY A 175     -66.820  96.383  -6.185  1.00  0.52           O  
ATOM   1385  N   THR A 176     -68.644  96.412  -4.898  1.00  0.57           N  
ATOM   1386  CA  THR A 176     -67.895  96.237  -3.650  1.00  0.57           C  
ATOM   1387  C   THR A 176     -67.827  94.790  -3.170  1.00  0.57           C  
ATOM   1388  O   THR A 176     -67.847  94.483  -1.972  1.00  0.57           O  
ATOM   1389  CB  THR A 176     -68.311  97.160  -2.504  1.00  0.57           C  
ATOM   1390  OG1 THR A 176     -69.644  96.949  -2.043  1.00  0.57           O  
ATOM   1391  CG2 THR A 176     -68.246  98.614  -2.988  1.00  0.57           C  
ATOM   1392  N   ALA A 177     -67.750  93.809  -4.096  1.00  0.60           N  
ATOM   1393  CA  ALA A 177     -67.469  92.430  -3.728  1.00  0.60           C  
ATOM   1394  C   ALA A 177     -65.997  92.069  -3.862  1.00  0.60           C  
ATOM   1395  O   ALA A 177     -65.333  91.825  -2.857  1.00  0.60           O  
ATOM   1396  CB  ALA A 177     -68.325  91.425  -4.503  1.00  0.60           C  
ATOM   1397  N   TRP A 178     -65.461  92.061  -5.095  1.00  0.54           N  
ATOM   1398  CA  TRP A 178     -64.052  91.821  -5.364  1.00  0.54           C  
ATOM   1399  C   TRP A 178     -63.605  92.697  -6.533  1.00  0.54           C  
ATOM   1400  O   TRP A 178     -63.636  92.229  -7.675  1.00  0.54           O  
ATOM   1401  CB  TRP A 178     -63.781  90.330  -5.722  1.00  0.54           C  
ATOM   1402  CG  TRP A 178     -64.027  89.357  -4.587  1.00  0.54           C  
ATOM   1403  CD1 TRP A 178     -63.423  89.305  -3.362  1.00  0.54           C  
ATOM   1404  CD2 TRP A 178     -64.987  88.282  -4.606  1.00  0.54           C  
ATOM   1405  NE1 TRP A 178     -63.961  88.288  -2.594  1.00  0.54           N  
ATOM   1406  CE2 TRP A 178     -64.926  87.654  -3.351  1.00  0.54           C  
ATOM   1407  CE3 TRP A 178     -65.860  87.838  -5.600  1.00  0.54           C  
ATOM   1408  CZ2 TRP A 178     -65.742  86.567  -3.053  1.00  0.54           C  
ATOM   1409  CZ3 TRP A 178     -66.674  86.733  -5.303  1.00  0.54           C  
ATOM   1410  CH2 TRP A 178     -66.612  86.103  -4.053  1.00  0.54           C  
ATOM   1411  N   PRO A 179     -63.200  93.950  -6.343  1.00  0.55           N  
ATOM   1412  CA  PRO A 179     -62.894  94.818  -7.470  1.00  0.55           C  
ATOM   1413  C   PRO A 179     -61.408  95.158  -7.486  1.00  0.55           C  
ATOM   1414  O   PRO A 179     -60.732  95.100  -6.463  1.00  0.55           O  
ATOM   1415  CB  PRO A 179     -63.708  96.072  -7.153  1.00  0.55           C  
ATOM   1416  CG  PRO A 179     -63.581  96.198  -5.634  1.00  0.55           C  
ATOM   1417  CD  PRO A 179     -63.528  94.743  -5.149  1.00  0.55           C  
ATOM   1418  N   SER A 180     -60.810  95.512  -8.634  1.00  0.52           N  
ATOM   1419  CA  SER A 180     -61.282  95.331  -9.997  1.00  0.52           C  
ATOM   1420  C   SER A 180     -60.689  94.052 -10.546  1.00  0.52           C  
ATOM   1421  O   SER A 180     -59.798  93.447  -9.952  1.00  0.52           O  
ATOM   1422  CB  SER A 180     -60.916  96.521 -10.920  1.00  0.52           C  
ATOM   1423  OG  SER A 180     -59.502  96.713 -10.993  1.00  0.52           O  
ATOM   1424  N   ALA A 181     -61.132  93.600 -11.736  1.00  0.54           N  
ATOM   1425  CA  ALA A 181     -60.644  92.371 -12.338  1.00  0.54           C  
ATOM   1426  C   ALA A 181     -59.223  92.466 -12.901  1.00  0.54           C  
ATOM   1427  O   ALA A 181     -58.775  91.617 -13.660  1.00  0.54           O  
ATOM   1428  CB  ALA A 181     -61.614  91.955 -13.463  1.00  0.54           C  
ATOM   1429  N   ILE A 182     -58.476  93.511 -12.513  1.00  0.57           N  
ATOM   1430  CA  ILE A 182     -57.145  93.828 -12.976  1.00  0.57           C  
ATOM   1431  C   ILE A 182     -56.106  93.258 -12.025  1.00  0.57           C  
ATOM   1432  O   ILE A 182     -55.083  92.725 -12.447  1.00  0.57           O  
ATOM   1433  CB  ILE A 182     -57.022  95.350 -13.089  1.00  0.57           C  
ATOM   1434  CG1 ILE A 182     -58.093  95.883 -14.081  1.00  0.57           C  
ATOM   1435  CG2 ILE A 182     -55.594  95.763 -13.512  1.00  0.57           C  
ATOM   1436  CD1 ILE A 182     -58.148  97.412 -14.189  1.00  0.57           C  
ATOM   1437  N   ALA A 183     -56.351  93.312 -10.698  1.00  0.68           N  
ATOM   1438  CA  ALA A 183     -55.375  92.937  -9.689  1.00  0.68           C  
ATOM   1439  C   ALA A 183     -54.918  91.484  -9.743  1.00  0.68           C  
ATOM   1440  O   ALA A 183     -53.725  91.185  -9.718  1.00  0.68           O  
ATOM   1441  CB  ALA A 183     -55.977  93.214  -8.302  1.00  0.68           C  
ATOM   1442  N   GLY A 184     -55.869  90.537  -9.882  1.00  0.71           N  
ATOM   1443  CA  GLY A 184     -55.545  89.123 -10.035  1.00  0.71           C  
ATOM   1444  C   GLY A 184     -54.854  88.798 -11.335  1.00  0.71           C  
ATOM   1445  O   GLY A 184     -53.997  87.923 -11.386  1.00  0.71           O  
ATOM   1446  N   LEU A 185     -55.176  89.526 -12.425  1.00  0.64           N  
ATOM   1447  CA  LEU A 185     -54.483  89.398 -13.698  1.00  0.64           C  
ATOM   1448  C   LEU A 185     -53.028  89.832 -13.616  1.00  0.64           C  
ATOM   1449  O   LEU A 185     -52.143  89.150 -14.123  1.00  0.64           O  
ATOM   1450  CB  LEU A 185     -55.179  90.193 -14.830  1.00  0.64           C  
ATOM   1451  CG  LEU A 185     -56.589  89.695 -15.206  1.00  0.64           C  
ATOM   1452  CD1 LEU A 185     -57.188  90.603 -16.291  1.00  0.64           C  
ATOM   1453  CD2 LEU A 185     -56.601  88.236 -15.685  1.00  0.64           C  
ATOM   1454  N   VAL A 186     -52.733  90.951 -12.919  1.00  0.71           N  
ATOM   1455  CA  VAL A 186     -51.371  91.422 -12.682  1.00  0.71           C  
ATOM   1456  C   VAL A 186     -50.536  90.394 -11.928  1.00  0.71           C  
ATOM   1457  O   VAL A 186     -49.413  90.085 -12.324  1.00  0.71           O  
ATOM   1458  CB  VAL A 186     -51.376  92.764 -11.944  1.00  0.71           C  
ATOM   1459  CG1 VAL A 186     -49.967  93.183 -11.469  1.00  0.71           C  
ATOM   1460  CG2 VAL A 186     -51.929  93.849 -12.889  1.00  0.71           C  
ATOM   1461  N   VAL A 187     -51.093  89.777 -10.864  1.00  0.73           N  
ATOM   1462  CA  VAL A 187     -50.450  88.679 -10.147  1.00  0.73           C  
ATOM   1463  C   VAL A 187     -50.236  87.440 -11.013  1.00  0.73           C  
ATOM   1464  O   VAL A 187     -49.168  86.831 -11.000  1.00  0.73           O  
ATOM   1465  CB  VAL A 187     -51.227  88.307  -8.886  1.00  0.73           C  
ATOM   1466  CG1 VAL A 187     -50.580  87.100  -8.174  1.00  0.73           C  
ATOM   1467  CG2 VAL A 187     -51.244  89.520  -7.935  1.00  0.73           C  
ATOM   1468  N   PHE A 188     -51.240  87.044 -11.822  1.00  0.66           N  
ATOM   1469  CA  PHE A 188     -51.160  85.906 -12.724  1.00  0.66           C  
ATOM   1470  C   PHE A 188     -50.047  86.046 -13.766  1.00  0.66           C  
ATOM   1471  O   PHE A 188     -49.280  85.110 -14.010  1.00  0.66           O  
ATOM   1472  CB  PHE A 188     -52.546  85.730 -13.410  1.00  0.66           C  
ATOM   1473  CG  PHE A 188     -52.636  84.487 -14.252  1.00  0.66           C  
ATOM   1474  CD1 PHE A 188     -52.769  83.226 -13.650  1.00  0.66           C  
ATOM   1475  CD2 PHE A 188     -52.594  84.576 -15.653  1.00  0.66           C  
ATOM   1476  CE1 PHE A 188     -52.854  82.069 -14.436  1.00  0.66           C  
ATOM   1477  CE2 PHE A 188     -52.680  83.422 -16.442  1.00  0.66           C  
ATOM   1478  CZ  PHE A 188     -52.809  82.168 -15.832  1.00  0.66           C  
ATOM   1479  N   LEU A 189     -49.920  87.242 -14.376  1.00  0.69           N  
ATOM   1480  CA  LEU A 189     -48.851  87.558 -15.303  1.00  0.69           C  
ATOM   1481  C   LEU A 189     -47.461  87.578 -14.669  1.00  0.69           C  
ATOM   1482  O   LEU A 189     -46.525  86.977 -15.195  1.00  0.69           O  
ATOM   1483  CB  LEU A 189     -49.105  88.939 -15.963  1.00  0.69           C  
ATOM   1484  CG  LEU A 189     -50.361  89.014 -16.860  1.00  0.69           C  
ATOM   1485  CD1 LEU A 189     -50.638  90.473 -17.257  1.00  0.69           C  
ATOM   1486  CD2 LEU A 189     -50.246  88.133 -18.112  1.00  0.69           C  
ATOM   1487  N   THR A 190     -47.279  88.252 -13.510  1.00  0.74           N  
ATOM   1488  CA  THR A 190     -45.962  88.355 -12.876  1.00  0.74           C  
ATOM   1489  C   THR A 190     -45.468  87.050 -12.291  1.00  0.74           C  
ATOM   1490  O   THR A 190     -44.328  86.643 -12.520  1.00  0.74           O  
ATOM   1491  CB  THR A 190     -45.864  89.427 -11.786  1.00  0.74           C  
ATOM   1492  OG1 THR A 190     -46.835  89.250 -10.764  1.00  0.74           O  
ATOM   1493  CG2 THR A 190     -46.104  90.813 -12.397  1.00  0.74           C  
ATOM   1494  N   ALA A 191     -46.327  86.332 -11.539  1.00  0.75           N  
ATOM   1495  CA  ALA A 191     -45.942  85.153 -10.797  1.00  0.75           C  
ATOM   1496  C   ALA A 191     -45.450  84.007 -11.665  1.00  0.75           C  
ATOM   1497  O   ALA A 191     -44.425  83.398 -11.379  1.00  0.75           O  
ATOM   1498  CB  ALA A 191     -47.120  84.678  -9.923  1.00  0.75           C  
ATOM   1499  N   ASN A 192     -46.141  83.704 -12.781  1.00  0.70           N  
ATOM   1500  CA  ASN A 192     -45.780  82.603 -13.660  1.00  0.70           C  
ATOM   1501  C   ASN A 192     -44.429  82.732 -14.349  1.00  0.70           C  
ATOM   1502  O   ASN A 192     -43.710  81.745 -14.470  1.00  0.70           O  
ATOM   1503  CB  ASN A 192     -46.890  82.338 -14.701  1.00  0.70           C  
ATOM   1504  CG  ASN A 192     -48.011  81.587 -13.998  1.00  0.70           C  
ATOM   1505  OD1 ASN A 192     -47.808  80.440 -13.580  1.00  0.70           O  
ATOM   1506  ND2 ASN A 192     -49.194  82.214 -13.845  1.00  0.70           N  
ATOM   1507  N   VAL A 193     -44.032  83.939 -14.802  1.00  0.70           N  
ATOM   1508  CA  VAL A 193     -42.710  84.170 -15.379  1.00  0.70           C  
ATOM   1509  C   VAL A 193     -41.598  83.971 -14.356  1.00  0.70           C  
ATOM   1510  O   VAL A 193     -40.612  83.269 -14.578  1.00  0.70           O  
ATOM   1511  CB  VAL A 193     -42.629  85.575 -15.972  1.00  0.70           C  
ATOM   1512  CG1 VAL A 193     -41.219  85.871 -16.523  1.00  0.70           C  
ATOM   1513  CG2 VAL A 193     -43.669  85.698 -17.103  1.00  0.70           C  
ATOM   1514  N   LEU A 194     -41.772  84.535 -13.150  1.00  0.66           N  
ATOM   1515  CA  LEU A 194     -40.849  84.405 -12.040  1.00  0.66           C  
ATOM   1516  C   LEU A 194     -40.740  82.965 -11.541  1.00  0.66           C  
ATOM   1517  O   LEU A 194     -39.662  82.454 -11.242  1.00  0.66           O  
ATOM   1518  CB  LEU A 194     -41.287  85.403 -10.946  1.00  0.66           C  
ATOM   1519  CG  LEU A 194     -41.168  86.872 -11.421  1.00  0.66           C  
ATOM   1520  CD1 LEU A 194     -41.986  87.832 -10.548  1.00  0.66           C  
ATOM   1521  CD2 LEU A 194     -39.706  87.336 -11.480  1.00  0.66           C  
ATOM   1522  N   ARG A 195     -41.867  82.233 -11.552  1.00  0.60           N  
ATOM   1523  CA  ARG A 195     -41.952  80.835 -11.179  1.00  0.60           C  
ATOM   1524  C   ARG A 195     -41.593  79.909 -12.359  1.00  0.60           C  
ATOM   1525  O   ARG A 195     -41.714  78.689 -12.277  1.00  0.60           O  
ATOM   1526  CB  ARG A 195     -43.403  80.568 -10.686  1.00  0.60           C  
ATOM   1527  CG  ARG A 195     -43.664  79.236  -9.944  1.00  0.60           C  
ATOM   1528  CD  ARG A 195     -45.145  78.804  -9.866  1.00  0.60           C  
ATOM   1529  NE  ARG A 195     -45.786  78.873 -11.234  1.00  0.60           N  
ATOM   1530  CZ  ARG A 195     -45.510  78.066 -12.266  1.00  0.60           C  
ATOM   1531  NH1 ARG A 195     -46.143  78.255 -13.421  1.00  0.60           N  
ATOM   1532  NH2 ARG A 195     -44.608  77.097 -12.177  1.00  0.60           N  
ATOM   1533  N   ALA A 196     -41.075  80.455 -13.481  1.00  0.67           N  
ATOM   1534  CA  ALA A 196     -40.459  79.680 -14.543  1.00  0.67           C  
ATOM   1535  C   ALA A 196     -38.944  79.875 -14.588  1.00  0.67           C  
ATOM   1536  O   ALA A 196     -38.210  79.031 -15.101  1.00  0.67           O  
ATOM   1537  CB  ALA A 196     -41.061  80.116 -15.892  1.00  0.67           C  
ATOM   1538  N   PHE A 197     -38.421  80.981 -14.015  1.00  0.56           N  
ATOM   1539  CA  PHE A 197     -36.994  81.160 -13.781  1.00  0.56           C  
ATOM   1540  C   PHE A 197     -36.509  80.471 -12.516  1.00  0.56           C  
ATOM   1541  O   PHE A 197     -35.477  79.802 -12.522  1.00  0.56           O  
ATOM   1542  CB  PHE A 197     -36.597  82.657 -13.723  1.00  0.56           C  
ATOM   1543  CG  PHE A 197     -36.657  83.251 -15.102  1.00  0.56           C  
ATOM   1544  CD1 PHE A 197     -37.611  84.226 -15.429  1.00  0.56           C  
ATOM   1545  CD2 PHE A 197     -35.734  82.845 -16.082  1.00  0.56           C  
ATOM   1546  CE1 PHE A 197     -37.652  84.778 -16.716  1.00  0.56           C  
ATOM   1547  CE2 PHE A 197     -35.775  83.391 -17.371  1.00  0.56           C  
ATOM   1548  CZ  PHE A 197     -36.737  84.357 -17.689  1.00  0.56           C  
ATOM   1549  N   SER A 198     -37.251  80.582 -11.396  1.00  0.67           N  
ATOM   1550  CA  SER A 198     -36.866  79.963 -10.128  1.00  0.67           C  
ATOM   1551  C   SER A 198     -36.710  78.442 -10.127  1.00  0.67           C  
ATOM   1552  O   SER A 198     -35.741  77.986  -9.517  1.00  0.67           O  
ATOM   1553  CB  SER A 198     -37.782  80.384  -8.953  1.00  0.67           C  
ATOM   1554  OG  SER A 198     -37.670  81.789  -8.739  1.00  0.67           O  
ATOM   1555  N   PRO A 199     -37.530  77.588 -10.758  1.00  0.66           N  
ATOM   1556  CA  PRO A 199     -37.215  76.177 -10.973  1.00  0.66           C  
ATOM   1557  C   PRO A 199     -35.895  75.917 -11.654  1.00  0.66           C  
ATOM   1558  O   PRO A 199     -35.165  75.064 -11.174  1.00  0.66           O  
ATOM   1559  CB  PRO A 199     -38.403  75.626 -11.769  1.00  0.66           C  
ATOM   1560  CG  PRO A 199     -39.559  76.499 -11.288  1.00  0.66           C  
ATOM   1561  CD  PRO A 199     -38.905  77.876 -11.157  1.00  0.66           C  
ATOM   1562  N   LYS A 200     -35.542  76.660 -12.722  1.00  0.63           N  
ATOM   1563  CA  LYS A 200     -34.292  76.485 -13.449  1.00  0.63           C  
ATOM   1564  C   LYS A 200     -33.064  76.741 -12.590  1.00  0.63           C  
ATOM   1565  O   LYS A 200     -32.083  76.002 -12.616  1.00  0.63           O  
ATOM   1566  CB  LYS A 200     -34.238  77.416 -14.682  1.00  0.63           C  
ATOM   1567  CG  LYS A 200     -35.324  77.092 -15.714  1.00  0.63           C  
ATOM   1568  CD  LYS A 200     -35.313  78.081 -16.888  1.00  0.63           C  
ATOM   1569  CE  LYS A 200     -36.380  77.751 -17.930  1.00  0.63           C  
ATOM   1570  NZ  LYS A 200     -36.361  78.771 -19.000  1.00  0.63           N  
ATOM   1571  N   PHE A 201     -33.103  77.791 -11.746  1.00  0.63           N  
ATOM   1572  CA  PHE A 201     -32.091  77.998 -10.724  1.00  0.63           C  
ATOM   1573  C   PHE A 201     -32.061  76.866  -9.702  1.00  0.63           C  
ATOM   1574  O   PHE A 201     -30.996  76.373  -9.336  1.00  0.63           O  
ATOM   1575  CB  PHE A 201     -32.283  79.358 -10.002  1.00  0.63           C  
ATOM   1576  CG  PHE A 201     -32.116  80.541 -10.930  1.00  0.63           C  
ATOM   1577  CD1 PHE A 201     -31.099  80.596 -11.904  1.00  0.63           C  
ATOM   1578  CD2 PHE A 201     -32.963  81.654 -10.785  1.00  0.63           C  
ATOM   1579  CE1 PHE A 201     -30.946  81.724 -12.721  1.00  0.63           C  
ATOM   1580  CE2 PHE A 201     -32.809  82.787 -11.595  1.00  0.63           C  
ATOM   1581  CZ  PHE A 201     -31.801  82.820 -12.566  1.00  0.63           C  
ATOM   1582  N   GLY A 202     -33.238  76.370  -9.264  1.00  0.79           N  
ATOM   1583  CA  GLY A 202     -33.344  75.211  -8.382  1.00  0.79           C  
ATOM   1584  C   GLY A 202     -32.821  73.909  -8.951  1.00  0.79           C  
ATOM   1585  O   GLY A 202     -32.234  73.115  -8.226  1.00  0.79           O  
ATOM   1586  N   GLU A 203     -32.980  73.669 -10.266  1.00  0.71           N  
ATOM   1587  CA  GLU A 203     -32.409  72.557 -11.012  1.00  0.71           C  
ATOM   1588  C   GLU A 203     -30.884  72.606 -11.047  1.00  0.71           C  
ATOM   1589  O   GLU A 203     -30.202  71.615 -10.790  1.00  0.71           O  
ATOM   1590  CB  GLU A 203     -32.972  72.556 -12.458  1.00  0.71           C  
ATOM   1591  CG  GLU A 203     -34.482  72.195 -12.542  1.00  0.71           C  
ATOM   1592  CD  GLU A 203     -35.167  72.640 -13.840  1.00  0.71           C  
ATOM   1593  OE1 GLU A 203     -34.493  73.222 -14.729  1.00  0.71           O  
ATOM   1594  OE2 GLU A 203     -36.402  72.415 -13.932  1.00  0.71           O  
ATOM   1595  N   LEU A 204     -30.301  73.795 -11.298  1.00  0.76           N  
ATOM   1596  CA  LEU A 204     -28.867  74.042 -11.217  1.00  0.76           C  
ATOM   1597  C   LEU A 204     -28.299  73.883  -9.805  1.00  0.76           C  
ATOM   1598  O   LEU A 204     -27.213  73.341  -9.597  1.00  0.76           O  
ATOM   1599  CB  LEU A 204     -28.540  75.458 -11.752  1.00  0.76           C  
ATOM   1600  CG  LEU A 204     -28.832  75.645 -13.257  1.00  0.76           C  
ATOM   1601  CD1 LEU A 204     -28.787  77.134 -13.634  1.00  0.76           C  
ATOM   1602  CD2 LEU A 204     -27.870  74.836 -14.140  1.00  0.76           C  
ATOM   1603  N   VAL A 205     -29.039  74.342  -8.773  1.00  0.82           N  
ATOM   1604  CA  VAL A 205     -28.735  74.072  -7.371  1.00  0.82           C  
ATOM   1605  C   VAL A 205     -28.814  72.583  -7.051  1.00  0.82           C  
ATOM   1606  O   VAL A 205     -27.934  72.041  -6.388  1.00  0.82           O  
ATOM   1607  CB  VAL A 205     -29.636  74.887  -6.439  1.00  0.82           C  
ATOM   1608  CG1 VAL A 205     -29.498  74.484  -4.956  1.00  0.82           C  
ATOM   1609  CG2 VAL A 205     -29.261  76.374  -6.571  1.00  0.82           C  
ATOM   1610  N   ALA A 206     -29.840  71.862  -7.546  1.00  0.87           N  
ATOM   1611  CA  ALA A 206     -29.997  70.427  -7.391  1.00  0.87           C  
ATOM   1612  C   ALA A 206     -28.881  69.596  -8.021  1.00  0.87           C  
ATOM   1613  O   ALA A 206     -28.405  68.628  -7.425  1.00  0.87           O  
ATOM   1614  CB  ALA A 206     -31.359  69.979  -7.954  1.00  0.87           C  
ATOM   1615  N   GLU A 207     -28.400  69.972  -9.226  1.00  0.81           N  
ATOM   1616  CA  GLU A 207     -27.238  69.353  -9.847  1.00  0.81           C  
ATOM   1617  C   GLU A 207     -25.986  69.486  -8.991  1.00  0.81           C  
ATOM   1618  O   GLU A 207     -25.307  68.505  -8.684  1.00  0.81           O  
ATOM   1619  CB  GLU A 207     -26.932  70.031 -11.207  1.00  0.81           C  
ATOM   1620  CG  GLU A 207     -25.752  69.385 -11.983  1.00  0.81           C  
ATOM   1621  CD  GLU A 207     -24.984  70.346 -12.889  1.00  0.81           C  
ATOM   1622  OE1 GLU A 207     -25.249  71.569 -12.899  1.00  0.81           O  
ATOM   1623  OE2 GLU A 207     -24.013  69.832 -13.515  1.00  0.81           O  
ATOM   1624  N   GLU A 208     -25.693  70.710  -8.512  1.00  0.81           N  
ATOM   1625  CA  GLU A 208     -24.566  70.974  -7.638  1.00  0.81           C  
ATOM   1626  C   GLU A 208     -24.707  70.285  -6.283  1.00  0.81           C  
ATOM   1627  O   GLU A 208     -23.759  69.756  -5.703  1.00  0.81           O  
ATOM   1628  CB  GLU A 208     -24.334  72.494  -7.482  1.00  0.81           C  
ATOM   1629  CG  GLU A 208     -22.911  72.829  -6.972  1.00  0.81           C  
ATOM   1630  CD  GLU A 208     -21.870  72.518  -8.039  1.00  0.81           C  
ATOM   1631  OE1 GLU A 208     -21.731  73.376  -8.951  1.00  0.81           O  
ATOM   1632  OE2 GLU A 208     -21.263  71.424  -8.003  1.00  0.81           O  
ATOM   1633  N   ALA A 209     -25.952  70.214  -5.763  1.00  0.89           N  
ATOM   1634  CA  ALA A 209     -26.308  69.495  -4.563  1.00  0.89           C  
ATOM   1635  C   ALA A 209     -25.993  68.012  -4.623  1.00  0.89           C  
ATOM   1636  O   ALA A 209     -25.551  67.440  -3.620  1.00  0.89           O  
ATOM   1637  CB  ALA A 209     -27.801  69.666  -4.217  1.00  0.89           C  
ATOM   1638  N   ARG A 210     -26.215  67.389  -5.797  1.00  0.79           N  
ATOM   1639  CA  ARG A 210     -25.750  66.062  -6.133  1.00  0.79           C  
ATOM   1640  C   ARG A 210     -24.237  65.943  -6.283  1.00  0.79           C  
ATOM   1641  O   ARG A 210     -23.647  65.023  -5.727  1.00  0.79           O  
ATOM   1642  CB  ARG A 210     -26.437  65.546  -7.421  1.00  0.79           C  
ATOM   1643  CG  ARG A 210     -26.064  64.086  -7.740  1.00  0.79           C  
ATOM   1644  CD  ARG A 210     -26.795  63.482  -8.937  1.00  0.79           C  
ATOM   1645  NE  ARG A 210     -26.249  62.099  -9.032  1.00  0.79           N  
ATOM   1646  CZ  ARG A 210     -26.626  61.119  -9.856  1.00  0.79           C  
ATOM   1647  NH1 ARG A 210     -26.012  59.950  -9.700  1.00  0.79           N  
ATOM   1648  NH2 ARG A 210     -27.558  61.275 -10.784  1.00  0.79           N  
ATOM   1649  N   ARG A 211     -23.548  66.877  -6.984  1.00  0.77           N  
ATOM   1650  CA  ARG A 211     -22.104  66.813  -7.230  1.00  0.77           C  
ATOM   1651  C   ARG A 211     -21.282  66.741  -5.948  1.00  0.77           C  
ATOM   1652  O   ARG A 211     -20.374  65.921  -5.800  1.00  0.77           O  
ATOM   1653  CB  ARG A 211     -21.618  68.037  -8.055  1.00  0.77           C  
ATOM   1654  CG  ARG A 211     -22.041  68.020  -9.539  1.00  0.77           C  
ATOM   1655  CD  ARG A 211     -21.652  69.304 -10.292  1.00  0.77           C  
ATOM   1656  NE  ARG A 211     -22.022  69.129 -11.738  1.00  0.77           N  
ATOM   1657  CZ  ARG A 211     -21.309  68.490 -12.672  1.00  0.77           C  
ATOM   1658  NH1 ARG A 211     -21.816  68.449 -13.900  1.00  0.77           N  
ATOM   1659  NH2 ARG A 211     -20.141  67.923 -12.409  1.00  0.77           N  
ATOM   1660  N   LYS A 212     -21.646  67.554  -4.941  1.00  0.78           N  
ATOM   1661  CA  LYS A 212     -21.069  67.456  -3.615  1.00  0.78           C  
ATOM   1662  C   LYS A 212     -21.460  66.193  -2.841  1.00  0.78           C  
ATOM   1663  O   LYS A 212     -20.758  65.743  -1.937  1.00  0.78           O  
ATOM   1664  CB  LYS A 212     -21.468  68.681  -2.763  1.00  0.78           C  
ATOM   1665  CG  LYS A 212     -22.976  68.844  -2.502  1.00  0.78           C  
ATOM   1666  CD  LYS A 212     -23.307  69.892  -1.427  1.00  0.78           C  
ATOM   1667  CE  LYS A 212     -24.797  70.137  -1.168  1.00  0.78           C  
ATOM   1668  NZ  LYS A 212     -25.523  68.851  -1.079  1.00  0.78           N  
ATOM   1669  N   GLY A 213     -22.617  65.580  -3.159  1.00  0.88           N  
ATOM   1670  CA  GLY A 213     -23.122  64.401  -2.469  1.00  0.88           C  
ATOM   1671  C   GLY A 213     -22.383  63.155  -2.854  1.00  0.88           C  
ATOM   1672  O   GLY A 213     -22.008  62.368  -1.988  1.00  0.88           O  
ATOM   1673  N   GLU A 214     -22.109  62.997  -4.163  1.00  0.74           N  
ATOM   1674  CA  GLU A 214     -21.319  61.916  -4.729  1.00  0.74           C  
ATOM   1675  C   GLU A 214     -19.892  61.922  -4.199  1.00  0.74           C  
ATOM   1676  O   GLU A 214     -19.341  60.909  -3.775  1.00  0.74           O  
ATOM   1677  CB  GLU A 214     -21.255  62.057  -6.273  1.00  0.74           C  
ATOM   1678  CG  GLU A 214     -22.629  62.059  -6.994  1.00  0.74           C  
ATOM   1679  CD  GLU A 214     -23.345  60.712  -7.046  1.00  0.74           C  
ATOM   1680  OE1 GLU A 214     -22.847  59.706  -6.497  1.00  0.74           O  
ATOM   1681  OE2 GLU A 214     -24.436  60.696  -7.685  1.00  0.74           O  
ATOM   1682  N   LEU A 215     -19.266  63.116  -4.142  1.00  0.69           N  
ATOM   1683  CA  LEU A 215     -17.932  63.306  -3.601  1.00  0.69           C  
ATOM   1684  C   LEU A 215     -17.820  62.939  -2.122  1.00  0.69           C  
ATOM   1685  O   LEU A 215     -16.876  62.277  -1.692  1.00  0.69           O  
ATOM   1686  CB  LEU A 215     -17.502  64.771  -3.846  1.00  0.69           C  
ATOM   1687  CG  LEU A 215     -16.068  65.134  -3.408  1.00  0.69           C  
ATOM   1688  CD1 LEU A 215     -15.002  64.217  -4.017  1.00  0.69           C  
ATOM   1689  CD2 LEU A 215     -15.753  66.577  -3.803  1.00  0.69           C  
ATOM   1690  N   ARG A 216     -18.826  63.313  -1.305  1.00  0.67           N  
ATOM   1691  CA  ARG A 216     -18.914  62.890   0.082  1.00  0.67           C  
ATOM   1692  C   ARG A 216     -19.061  61.392   0.262  1.00  0.67           C  
ATOM   1693  O   ARG A 216     -18.441  60.795   1.138  1.00  0.67           O  
ATOM   1694  CB  ARG A 216     -20.125  63.544   0.776  1.00  0.67           C  
ATOM   1695  CG  ARG A 216     -20.081  63.420   2.313  1.00  0.67           C  
ATOM   1696  CD  ARG A 216     -21.170  64.213   3.037  1.00  0.67           C  
ATOM   1697  NE  ARG A 216     -22.501  63.688   2.579  1.00  0.67           N  
ATOM   1698  CZ  ARG A 216     -23.140  62.640   3.120  1.00  0.67           C  
ATOM   1699  NH1 ARG A 216     -24.330  62.287   2.636  1.00  0.67           N  
ATOM   1700  NH2 ARG A 216     -22.621  61.938   4.121  1.00  0.67           N  
ATOM   1701  N   TYR A 217     -19.896  60.754  -0.582  1.00  0.68           N  
ATOM   1702  CA  TYR A 217     -20.098  59.320  -0.608  1.00  0.68           C  
ATOM   1703  C   TYR A 217     -18.815  58.565  -0.943  1.00  0.68           C  
ATOM   1704  O   TYR A 217     -18.497  57.555  -0.320  1.00  0.68           O  
ATOM   1705  CB  TYR A 217     -21.247  58.992  -1.601  1.00  0.68           C  
ATOM   1706  CG  TYR A 217     -21.563  57.523  -1.630  1.00  0.68           C  
ATOM   1707  CD1 TYR A 217     -22.182  56.900  -0.535  1.00  0.68           C  
ATOM   1708  CD2 TYR A 217     -21.190  56.749  -2.738  1.00  0.68           C  
ATOM   1709  CE1 TYR A 217     -22.410  55.516  -0.542  1.00  0.68           C  
ATOM   1710  CE2 TYR A 217     -21.421  55.367  -2.751  1.00  0.68           C  
ATOM   1711  CZ  TYR A 217     -22.024  54.752  -1.648  1.00  0.68           C  
ATOM   1712  OH  TYR A 217     -22.248  53.362  -1.665  1.00  0.68           O  
ATOM   1713  N   MET A 218     -18.012  59.059  -1.905  1.00  0.67           N  
ATOM   1714  CA  MET A 218     -16.698  58.501  -2.174  1.00  0.67           C  
ATOM   1715  C   MET A 218     -15.743  58.596  -0.989  1.00  0.67           C  
ATOM   1716  O   MET A 218     -15.120  57.605  -0.616  1.00  0.67           O  
ATOM   1717  CB  MET A 218     -16.044  59.186  -3.398  1.00  0.67           C  
ATOM   1718  CG  MET A 218     -16.754  58.884  -4.734  1.00  0.67           C  
ATOM   1719  SD  MET A 218     -16.833  57.121  -5.186  1.00  0.67           S  
ATOM   1720  CE  MET A 218     -15.070  56.878  -5.546  1.00  0.67           C  
ATOM   1721  N   HIS A 219     -15.651  59.768  -0.323  1.00  0.64           N  
ATOM   1722  CA  HIS A 219     -14.828  59.938   0.870  1.00  0.64           C  
ATOM   1723  C   HIS A 219     -15.260  59.049   2.030  1.00  0.64           C  
ATOM   1724  O   HIS A 219     -14.448  58.330   2.613  1.00  0.64           O  
ATOM   1725  CB  HIS A 219     -14.841  61.420   1.326  1.00  0.64           C  
ATOM   1726  CG  HIS A 219     -14.126  61.710   2.619  1.00  0.64           C  
ATOM   1727  ND1 HIS A 219     -14.863  61.796   3.787  1.00  0.64           N  
ATOM   1728  CD2 HIS A 219     -12.817  61.983   2.866  1.00  0.64           C  
ATOM   1729  CE1 HIS A 219     -13.988  62.123   4.717  1.00  0.64           C  
ATOM   1730  NE2 HIS A 219     -12.738  62.250   4.217  1.00  0.64           N  
ATOM   1731  N   SER A 220     -16.571  59.006   2.350  1.00  0.74           N  
ATOM   1732  CA  SER A 220     -17.091  58.154   3.410  1.00  0.74           C  
ATOM   1733  C   SER A 220     -16.928  56.677   3.115  1.00  0.74           C  
ATOM   1734  O   SER A 220     -16.612  55.887   4.002  1.00  0.74           O  
ATOM   1735  CB  SER A 220     -18.551  58.476   3.840  1.00  0.74           C  
ATOM   1736  OG  SER A 220     -19.523  58.142   2.847  1.00  0.74           O  
ATOM   1737  N   ARG A 221     -17.097  56.256   1.846  1.00  0.68           N  
ATOM   1738  CA  ARG A 221     -16.807  54.905   1.416  1.00  0.68           C  
ATOM   1739  C   ARG A 221     -15.332  54.506   1.503  1.00  0.68           C  
ATOM   1740  O   ARG A 221     -15.023  53.404   1.959  1.00  0.68           O  
ATOM   1741  CB  ARG A 221     -17.362  54.645  -0.007  1.00  0.68           C  
ATOM   1742  CG  ARG A 221     -17.320  53.168  -0.459  1.00  0.68           C  
ATOM   1743  CD  ARG A 221     -18.055  52.184   0.464  1.00  0.68           C  
ATOM   1744  NE  ARG A 221     -19.516  52.497   0.383  1.00  0.68           N  
ATOM   1745  CZ  ARG A 221     -20.457  51.920   1.141  1.00  0.68           C  
ATOM   1746  NH1 ARG A 221     -21.737  52.148   0.861  1.00  0.68           N  
ATOM   1747  NH2 ARG A 221     -20.152  51.116   2.156  1.00  0.68           N  
ATOM   1748  N   VAL A 222     -14.381  55.387   1.107  1.00  0.72           N  
ATOM   1749  CA  VAL A 222     -12.938  55.185   1.275  1.00  0.72           C  
ATOM   1750  C   VAL A 222     -12.584  55.005   2.739  1.00  0.72           C  
ATOM   1751  O   VAL A 222     -11.876  54.069   3.119  1.00  0.72           O  
ATOM   1752  CB  VAL A 222     -12.128  56.352   0.696  1.00  0.72           C  
ATOM   1753  CG1 VAL A 222     -10.655  56.366   1.169  1.00  0.72           C  
ATOM   1754  CG2 VAL A 222     -12.150  56.265  -0.841  1.00  0.72           C  
ATOM   1755  N   VAL A 223     -13.145  55.865   3.605  1.00  0.75           N  
ATOM   1756  CA  VAL A 223     -13.012  55.764   5.042  1.00  0.75           C  
ATOM   1757  C   VAL A 223     -13.597  54.484   5.618  1.00  0.75           C  
ATOM   1758  O   VAL A 223     -12.934  53.793   6.386  1.00  0.75           O  
ATOM   1759  CB  VAL A 223     -13.660  56.970   5.697  1.00  0.75           C  
ATOM   1760  CG1 VAL A 223     -13.790  56.751   7.208  1.00  0.75           C  
ATOM   1761  CG2 VAL A 223     -12.807  58.226   5.422  1.00  0.75           C  
ATOM   1762  N   ALA A 224     -14.831  54.093   5.230  1.00  0.74           N  
ATOM   1763  CA  ALA A 224     -15.484  52.904   5.748  1.00  0.74           C  
ATOM   1764  C   ALA A 224     -14.712  51.629   5.455  1.00  0.74           C  
ATOM   1765  O   ALA A 224     -14.440  50.846   6.360  1.00  0.74           O  
ATOM   1766  CB  ALA A 224     -16.914  52.797   5.182  1.00  0.74           C  
ATOM   1767  N   ASN A 225     -14.218  51.464   4.203  1.00  0.71           N  
ATOM   1768  CA  ASN A 225     -13.349  50.344   3.863  1.00  0.71           C  
ATOM   1769  C   ASN A 225     -12.077  50.339   4.706  1.00  0.71           C  
ATOM   1770  O   ASN A 225     -11.651  49.310   5.213  1.00  0.71           O  
ATOM   1771  CB  ASN A 225     -12.848  50.400   2.392  1.00  0.71           C  
ATOM   1772  CG  ASN A 225     -13.953  50.255   1.356  1.00  0.71           C  
ATOM   1773  OD1 ASN A 225     -14.734  49.301   1.308  1.00  0.71           O  
ATOM   1774  ND2 ASN A 225     -13.966  51.205   0.389  1.00  0.71           N  
ATOM   1775  N   SER A 226     -11.449  51.516   4.884  1.00  0.74           N  
ATOM   1776  CA  SER A 226     -10.228  51.678   5.667  1.00  0.74           C  
ATOM   1777  C   SER A 226     -10.391  51.331   7.132  1.00  0.74           C  
ATOM   1778  O   SER A 226      -9.532  50.682   7.721  1.00  0.74           O  
ATOM   1779  CB  SER A 226      -9.685  53.122   5.612  1.00  0.74           C  
ATOM   1780  OG  SER A 226      -9.452  53.516   4.258  1.00  0.74           O  
ATOM   1781  N   GLU A 227     -11.517  51.744   7.748  1.00  0.70           N  
ATOM   1782  CA  GLU A 227     -11.881  51.422   9.117  1.00  0.70           C  
ATOM   1783  C   GLU A 227     -12.116  49.934   9.335  1.00  0.70           C  
ATOM   1784  O   GLU A 227     -11.584  49.307  10.248  1.00  0.70           O  
ATOM   1785  CB  GLU A 227     -13.190  52.165   9.476  1.00  0.70           C  
ATOM   1786  CG  GLU A 227     -13.349  52.458  10.983  1.00  0.70           C  
ATOM   1787  CD  GLU A 227     -12.989  53.909  11.248  1.00  0.70           C  
ATOM   1788  OE1 GLU A 227     -13.921  54.754  11.145  1.00  0.70           O  
ATOM   1789  OE2 GLU A 227     -11.807  54.249  11.479  1.00  0.70           O  
ATOM   1790  N   GLU A 228     -12.890  49.311   8.425  1.00  0.69           N  
ATOM   1791  CA  GLU A 228     -13.231  47.902   8.439  1.00  0.69           C  
ATOM   1792  C   GLU A 228     -12.027  46.993   8.259  1.00  0.69           C  
ATOM   1793  O   GLU A 228     -11.924  45.910   8.834  1.00  0.69           O  
ATOM   1794  CB  GLU A 228     -14.326  47.645   7.374  1.00  0.69           C  
ATOM   1795  CG  GLU A 228     -15.672  48.264   7.827  1.00  0.69           C  
ATOM   1796  CD  GLU A 228     -16.750  48.439   6.758  1.00  0.69           C  
ATOM   1797  OE1 GLU A 228     -16.507  48.195   5.548  1.00  0.69           O  
ATOM   1798  OE2 GLU A 228     -17.860  48.861   7.190  1.00  0.69           O  
ATOM   1799  N   ILE A 229     -11.060  47.452   7.451  1.00  0.73           N  
ATOM   1800  CA  ILE A 229      -9.869  46.733   7.046  1.00  0.73           C  
ATOM   1801  C   ILE A 229      -8.649  47.320   7.790  1.00  0.73           C  
ATOM   1802  O   ILE A 229      -7.493  47.219   7.383  1.00  0.73           O  
ATOM   1803  CB  ILE A 229      -9.852  46.712   5.504  1.00  0.73           C  
ATOM   1804  CG1 ILE A 229     -11.082  45.902   5.011  1.00  0.73           C  
ATOM   1805  CG2 ILE A 229      -8.566  46.146   4.888  1.00  0.73           C  
ATOM   1806  CD1 ILE A 229     -11.283  45.904   3.493  1.00  0.73           C  
ATOM   1807  N   ALA A 230      -8.863  47.910   8.992  1.00  0.71           N  
ATOM   1808  CA  ALA A 230      -7.840  48.561   9.808  1.00  0.71           C  
ATOM   1809  C   ALA A 230      -6.630  47.702  10.180  1.00  0.71           C  
ATOM   1810  O   ALA A 230      -5.503  48.188  10.259  1.00  0.71           O  
ATOM   1811  CB  ALA A 230      -8.462  49.118  11.101  1.00  0.71           C  
ATOM   1812  N   PHE A 231      -6.815  46.381  10.383  1.00  0.62           N  
ATOM   1813  CA  PHE A 231      -5.738  45.417  10.580  1.00  0.62           C  
ATOM   1814  C   PHE A 231      -4.732  45.391   9.431  1.00  0.62           C  
ATOM   1815  O   PHE A 231      -3.518  45.387   9.623  1.00  0.62           O  
ATOM   1816  CB  PHE A 231      -6.329  43.988  10.684  1.00  0.62           C  
ATOM   1817  CG  PHE A 231      -7.047  43.802  11.987  1.00  0.62           C  
ATOM   1818  CD1 PHE A 231      -8.441  43.943  12.095  1.00  0.62           C  
ATOM   1819  CD2 PHE A 231      -6.309  43.446  13.124  1.00  0.62           C  
ATOM   1820  CE1 PHE A 231      -9.082  43.721  13.321  1.00  0.62           C  
ATOM   1821  CE2 PHE A 231      -6.948  43.185  14.341  1.00  0.62           C  
ATOM   1822  CZ  PHE A 231      -8.337  43.331  14.441  1.00  0.62           C  
ATOM   1823  N   TYR A 232      -5.236  45.419   8.186  1.00  0.61           N  
ATOM   1824  CA  TYR A 232      -4.457  45.518   6.969  1.00  0.61           C  
ATOM   1825  C   TYR A 232      -3.750  46.874   6.871  1.00  0.61           C  
ATOM   1826  O   TYR A 232      -2.565  46.963   6.571  1.00  0.61           O  
ATOM   1827  CB  TYR A 232      -5.444  45.278   5.807  1.00  0.61           C  
ATOM   1828  CG  TYR A 232      -4.819  45.099   4.464  1.00  0.61           C  
ATOM   1829  CD1 TYR A 232      -3.962  44.019   4.211  1.00  0.61           C  
ATOM   1830  CD2 TYR A 232      -5.092  46.021   3.439  1.00  0.61           C  
ATOM   1831  CE1 TYR A 232      -3.313  43.915   2.974  1.00  0.61           C  
ATOM   1832  CE2 TYR A 232      -4.456  45.908   2.198  1.00  0.61           C  
ATOM   1833  CZ  TYR A 232      -3.548  44.873   1.983  1.00  0.61           C  
ATOM   1834  OH  TYR A 232      -2.689  44.940   0.877  1.00  0.61           O  
ATOM   1835  N   GLY A 233      -4.436  47.979   7.232  1.00  0.65           N  
ATOM   1836  CA  GLY A 233      -3.790  49.290   7.318  1.00  0.65           C  
ATOM   1837  C   GLY A 233      -2.688  49.395   8.358  1.00  0.65           C  
ATOM   1838  O   GLY A 233      -1.711  50.111   8.172  1.00  0.65           O  
ATOM   1839  N   GLY A 234      -2.784  48.646   9.476  1.00  0.62           N  
ATOM   1840  CA  GLY A 234      -1.721  48.544  10.481  1.00  0.62           C  
ATOM   1841  C   GLY A 234      -0.556  47.684  10.050  1.00  0.62           C  
ATOM   1842  O   GLY A 234       0.600  47.982  10.332  1.00  0.62           O  
ATOM   1843  N   HIS A 235      -0.839  46.606   9.297  1.00  0.59           N  
ATOM   1844  CA  HIS A 235       0.119  45.720   8.638  1.00  0.59           C  
ATOM   1845  C   HIS A 235       1.014  46.472   7.666  1.00  0.59           C  
ATOM   1846  O   HIS A 235       2.209  46.209   7.510  1.00  0.59           O  
ATOM   1847  CB  HIS A 235      -0.708  44.663   7.858  1.00  0.59           C  
ATOM   1848  CG  HIS A 235      -0.029  43.623   7.036  1.00  0.59           C  
ATOM   1849  ND1 HIS A 235       1.136  43.043   7.472  1.00  0.59           N  
ATOM   1850  CD2 HIS A 235      -0.538  42.923   5.987  1.00  0.59           C  
ATOM   1851  CE1 HIS A 235       1.308  41.994   6.703  1.00  0.59           C  
ATOM   1852  NE2 HIS A 235       0.327  41.872   5.778  1.00  0.59           N  
ATOM   1853  N   GLU A 236       0.418  47.448   6.975  1.00  0.57           N  
ATOM   1854  CA  GLU A 236       1.060  48.212   5.938  1.00  0.57           C  
ATOM   1855  C   GLU A 236       1.507  49.589   6.369  1.00  0.57           C  
ATOM   1856  O   GLU A 236       2.084  50.335   5.587  1.00  0.57           O  
ATOM   1857  CB  GLU A 236       0.094  48.234   4.749  1.00  0.57           C  
ATOM   1858  CG  GLU A 236       0.141  46.831   4.127  1.00  0.57           C  
ATOM   1859  CD  GLU A 236      -0.730  46.547   2.925  1.00  0.57           C  
ATOM   1860  OE1 GLU A 236      -1.773  47.187   2.714  1.00  0.57           O  
ATOM   1861  OE2 GLU A 236      -0.361  45.547   2.240  1.00  0.57           O  
ATOM   1862  N   VAL A 237       1.321  49.936   7.662  1.00  0.57           N  
ATOM   1863  CA  VAL A 237       1.776  51.189   8.271  1.00  0.57           C  
ATOM   1864  C   VAL A 237       1.114  52.388   7.590  1.00  0.57           C  
ATOM   1865  O   VAL A 237       1.625  53.500   7.469  1.00  0.57           O  
ATOM   1866  CB  VAL A 237       3.304  51.286   8.392  1.00  0.57           C  
ATOM   1867  CG1 VAL A 237       3.730  52.359   9.417  1.00  0.57           C  
ATOM   1868  CG2 VAL A 237       3.850  49.923   8.860  1.00  0.57           C  
ATOM   1869  N   GLU A 238      -0.138  52.172   7.154  1.00  0.59           N  
ATOM   1870  CA  GLU A 238      -0.842  53.068   6.277  1.00  0.59           C  
ATOM   1871  C   GLU A 238      -1.700  54.033   7.038  1.00  0.59           C  
ATOM   1872  O   GLU A 238      -2.377  54.865   6.448  1.00  0.59           O  
ATOM   1873  CB  GLU A 238      -1.763  52.305   5.296  1.00  0.59           C  
ATOM   1874  CG  GLU A 238      -1.043  51.897   3.996  1.00  0.59           C  
ATOM   1875  CD  GLU A 238      -1.952  51.923   2.781  1.00  0.59           C  
ATOM   1876  OE1 GLU A 238      -3.181  52.171   2.873  1.00  0.59           O  
ATOM   1877  OE2 GLU A 238      -1.392  51.856   1.658  1.00  0.59           O  
ATOM   1878  N   LEU A 239      -1.687  53.996   8.375  1.00  0.62           N  
ATOM   1879  CA  LEU A 239      -2.562  54.806   9.196  1.00  0.62           C  
ATOM   1880  C   LEU A 239      -2.346  56.305   8.981  1.00  0.62           C  
ATOM   1881  O   LEU A 239      -3.290  57.050   8.736  1.00  0.62           O  
ATOM   1882  CB  LEU A 239      -2.413  54.362  10.668  1.00  0.62           C  
ATOM   1883  CG  LEU A 239      -2.678  52.846  10.878  1.00  0.62           C  
ATOM   1884  CD1 LEU A 239      -2.314  52.426  12.306  1.00  0.62           C  
ATOM   1885  CD2 LEU A 239      -4.129  52.443  10.572  1.00  0.62           C  
ATOM   1886  N   ALA A 240      -1.079  56.761   8.930  1.00  0.63           N  
ATOM   1887  CA  ALA A 240      -0.704  58.071   8.428  1.00  0.63           C  
ATOM   1888  C   ALA A 240      -0.931  58.280   6.924  1.00  0.63           C  
ATOM   1889  O   ALA A 240      -1.346  59.347   6.472  1.00  0.63           O  
ATOM   1890  CB  ALA A 240       0.778  58.325   8.763  1.00  0.63           C  
ATOM   1891  N   LEU A 241      -0.642  57.267   6.086  1.00  0.59           N  
ATOM   1892  CA  LEU A 241      -0.758  57.357   4.639  1.00  0.59           C  
ATOM   1893  C   LEU A 241      -2.191  57.517   4.113  1.00  0.59           C  
ATOM   1894  O   LEU A 241      -2.458  58.378   3.272  1.00  0.59           O  
ATOM   1895  CB  LEU A 241      -0.049  56.150   3.981  1.00  0.59           C  
ATOM   1896  CG  LEU A 241       1.461  56.057   4.308  1.00  0.59           C  
ATOM   1897  CD1 LEU A 241       2.027  54.681   3.941  1.00  0.59           C  
ATOM   1898  CD2 LEU A 241       2.276  57.144   3.594  1.00  0.59           C  
ATOM   1899  N   LEU A 242      -3.148  56.727   4.645  1.00  0.63           N  
ATOM   1900  CA  LEU A 242      -4.589  56.825   4.450  1.00  0.63           C  
ATOM   1901  C   LEU A 242      -5.174  58.105   5.005  1.00  0.63           C  
ATOM   1902  O   LEU A 242      -6.048  58.725   4.401  1.00  0.63           O  
ATOM   1903  CB  LEU A 242      -5.314  55.652   5.162  1.00  0.63           C  
ATOM   1904  CG  LEU A 242      -5.160  54.296   4.454  1.00  0.63           C  
ATOM   1905  CD1 LEU A 242      -5.434  53.134   5.422  1.00  0.63           C  
ATOM   1906  CD2 LEU A 242      -6.088  54.188   3.237  1.00  0.63           C  
ATOM   1907  N   GLN A 243      -4.711  58.529   6.197  1.00  0.64           N  
ATOM   1908  CA  GLN A 243      -5.136  59.772   6.802  1.00  0.64           C  
ATOM   1909  C   GLN A 243      -4.714  60.991   5.997  1.00  0.64           C  
ATOM   1910  O   GLN A 243      -5.553  61.853   5.735  1.00  0.64           O  
ATOM   1911  CB  GLN A 243      -4.592  59.841   8.249  1.00  0.64           C  
ATOM   1912  CG  GLN A 243      -5.263  60.849   9.210  1.00  0.64           C  
ATOM   1913  CD  GLN A 243      -4.874  62.304   8.973  1.00  0.64           C  
ATOM   1914  OE1 GLN A 243      -3.734  62.716   9.170  1.00  0.64           O  
ATOM   1915  NE2 GLN A 243      -5.857  63.131   8.558  1.00  0.64           N  
ATOM   1916  N   ARG A 244      -3.430  61.062   5.553  1.00  0.55           N  
ATOM   1917  CA  ARG A 244      -2.913  62.302   4.996  1.00  0.55           C  
ATOM   1918  C   ARG A 244      -1.748  62.277   4.003  1.00  0.55           C  
ATOM   1919  O   ARG A 244      -1.144  63.324   3.769  1.00  0.55           O  
ATOM   1920  CB  ARG A 244      -2.561  63.297   6.133  1.00  0.55           C  
ATOM   1921  CG  ARG A 244      -1.322  62.994   7.013  1.00  0.55           C  
ATOM   1922  CD  ARG A 244      -0.021  63.722   6.641  1.00  0.55           C  
ATOM   1923  NE  ARG A 244      -0.311  65.197   6.669  1.00  0.55           N  
ATOM   1924  CZ  ARG A 244      -0.153  66.049   5.648  1.00  0.55           C  
ATOM   1925  NH1 ARG A 244      -0.383  67.341   5.870  1.00  0.55           N  
ATOM   1926  NH2 ARG A 244       0.133  65.647   4.419  1.00  0.55           N  
ATOM   1927  N   SER A 245      -1.382  61.153   3.343  1.00  0.53           N  
ATOM   1928  CA  SER A 245      -0.281  61.222   2.359  1.00  0.53           C  
ATOM   1929  C   SER A 245      -0.578  60.734   0.950  1.00  0.53           C  
ATOM   1930  O   SER A 245       0.101  61.143   0.013  1.00  0.53           O  
ATOM   1931  CB  SER A 245       0.935  60.389   2.806  1.00  0.53           C  
ATOM   1932  OG  SER A 245       1.363  60.746   4.121  1.00  0.53           O  
ATOM   1933  N   TYR A 246      -1.578  59.858   0.748  1.00  0.49           N  
ATOM   1934  CA  TYR A 246      -1.920  59.317  -0.563  1.00  0.49           C  
ATOM   1935  C   TYR A 246      -2.797  60.261  -1.412  1.00  0.49           C  
ATOM   1936  O   TYR A 246      -3.369  61.211  -0.915  1.00  0.49           O  
ATOM   1937  CB  TYR A 246      -2.540  57.912  -0.321  1.00  0.49           C  
ATOM   1938  CG  TYR A 246      -2.936  57.225  -1.589  1.00  0.49           C  
ATOM   1939  CD1 TYR A 246      -2.019  57.051  -2.642  1.00  0.49           C  
ATOM   1940  CD2 TYR A 246      -4.280  56.875  -1.776  1.00  0.49           C  
ATOM   1941  CE1 TYR A 246      -2.470  56.622  -3.899  1.00  0.49           C  
ATOM   1942  CE2 TYR A 246      -4.715  56.400  -3.013  1.00  0.49           C  
ATOM   1943  CZ  TYR A 246      -3.823  56.325  -4.081  1.00  0.49           C  
ATOM   1944  OH  TYR A 246      -4.326  56.043  -5.354  1.00  0.49           O  
ATOM   1945  N   GLN A 247      -2.938  60.086  -2.745  1.00  0.44           N  
ATOM   1946  CA  GLN A 247      -3.791  60.980  -3.525  1.00  0.44           C  
ATOM   1947  C   GLN A 247      -5.282  60.926  -3.222  1.00  0.44           C  
ATOM   1948  O   GLN A 247      -5.912  61.972  -3.134  1.00  0.44           O  
ATOM   1949  CB  GLN A 247      -3.515  60.927  -5.044  1.00  0.44           C  
ATOM   1950  CG  GLN A 247      -2.054  61.329  -5.352  1.00  0.44           C  
ATOM   1951  CD  GLN A 247      -1.856  61.715  -6.816  1.00  0.44           C  
ATOM   1952  OE1 GLN A 247      -1.994  60.908  -7.732  1.00  0.44           O  
ATOM   1953  NE2 GLN A 247      -1.492  62.996  -7.063  1.00  0.44           N  
ATOM   1954  N   ASP A 248      -5.856  59.728  -2.995  1.00  0.50           N  
ATOM   1955  CA  ASP A 248      -7.277  59.554  -2.732  1.00  0.50           C  
ATOM   1956  C   ASP A 248      -7.560  59.391  -1.225  1.00  0.50           C  
ATOM   1957  O   ASP A 248      -8.508  58.729  -0.809  1.00  0.50           O  
ATOM   1958  CB  ASP A 248      -7.815  58.314  -3.500  1.00  0.50           C  
ATOM   1959  CG  ASP A 248      -7.239  58.200  -4.906  1.00  0.50           C  
ATOM   1960  OD1 ASP A 248      -7.291  59.185  -5.677  1.00  0.50           O  
ATOM   1961  OD2 ASP A 248      -6.693  57.104  -5.210  1.00  0.50           O  
ATOM   1962  N   LEU A 249      -6.674  59.938  -0.364  1.00  0.54           N  
ATOM   1963  CA  LEU A 249      -6.737  59.939   1.096  1.00  0.54           C  
ATOM   1964  C   LEU A 249      -7.995  60.513   1.776  1.00  0.54           C  
ATOM   1965  O   LEU A 249      -8.915  61.027   1.148  1.00  0.54           O  
ATOM   1966  CB  LEU A 249      -5.441  60.597   1.647  1.00  0.54           C  
ATOM   1967  CG  LEU A 249      -5.225  62.081   1.263  1.00  0.54           C  
ATOM   1968  CD1 LEU A 249      -6.048  63.021   2.098  1.00  0.54           C  
ATOM   1969  CD2 LEU A 249      -3.794  62.543   1.511  1.00  0.54           C  
ATOM   1970  N   ALA A 250      -8.066  60.463   3.131  1.00  0.63           N  
ATOM   1971  CA  ALA A 250      -9.123  61.151   3.859  1.00  0.63           C  
ATOM   1972  C   ALA A 250      -8.981  62.683   3.937  1.00  0.63           C  
ATOM   1973  O   ALA A 250      -9.854  63.401   3.454  1.00  0.63           O  
ATOM   1974  CB  ALA A 250      -9.236  60.566   5.283  1.00  0.63           C  
ATOM   1975  N   SER A 251      -7.864  63.242   4.480  1.00  0.57           N  
ATOM   1976  CA  SER A 251      -7.715  64.697   4.586  1.00  0.57           C  
ATOM   1977  C   SER A 251      -6.293  65.261   4.634  1.00  0.57           C  
ATOM   1978  O   SER A 251      -5.291  64.563   4.631  1.00  0.57           O  
ATOM   1979  CB  SER A 251      -8.427  65.237   5.838  1.00  0.57           C  
ATOM   1980  OG  SER A 251      -8.825  66.608   5.691  1.00  0.57           O  
ATOM   1981  N   GLN A 252      -6.207  66.605   4.665  1.00  0.48           N  
ATOM   1982  CA  GLN A 252      -5.036  67.456   4.867  1.00  0.48           C  
ATOM   1983  C   GLN A 252      -4.370  67.986   3.608  1.00  0.48           C  
ATOM   1984  O   GLN A 252      -3.628  68.962   3.684  1.00  0.48           O  
ATOM   1985  CB  GLN A 252      -3.915  66.938   5.808  1.00  0.48           C  
ATOM   1986  CG  GLN A 252      -4.381  66.542   7.228  1.00  0.48           C  
ATOM   1987  CD  GLN A 252      -3.324  66.832   8.298  1.00  0.48           C  
ATOM   1988  OE1 GLN A 252      -2.116  66.886   8.054  1.00  0.48           O  
ATOM   1989  NE2 GLN A 252      -3.800  67.060   9.544  1.00  0.48           N  
ATOM   1990  N   ILE A 253      -4.667  67.462   2.410  1.00  0.41           N  
ATOM   1991  CA  ILE A 253      -4.104  67.968   1.160  1.00  0.41           C  
ATOM   1992  C   ILE A 253      -5.264  68.309   0.237  1.00  0.41           C  
ATOM   1993  O   ILE A 253      -6.403  67.951   0.517  1.00  0.41           O  
ATOM   1994  CB  ILE A 253      -3.098  66.986   0.561  1.00  0.41           C  
ATOM   1995  CG1 ILE A 253      -2.192  67.602  -0.532  1.00  0.41           C  
ATOM   1996  CG2 ILE A 253      -3.823  65.725   0.067  1.00  0.41           C  
ATOM   1997  CD1 ILE A 253      -0.962  66.736  -0.833  1.00  0.41           C  
ATOM   1998  N   ASN A 254      -5.048  69.085  -0.843  1.00  0.48           N  
ATOM   1999  CA  ASN A 254      -6.121  69.513  -1.726  1.00  0.48           C  
ATOM   2000  C   ASN A 254      -6.104  68.679  -3.004  1.00  0.48           C  
ATOM   2001  O   ASN A 254      -5.516  69.076  -4.005  1.00  0.48           O  
ATOM   2002  CB  ASN A 254      -5.969  71.032  -2.025  1.00  0.48           C  
ATOM   2003  CG  ASN A 254      -7.284  71.619  -2.527  1.00  0.48           C  
ATOM   2004  OD1 ASN A 254      -8.356  71.229  -2.069  1.00  0.48           O  
ATOM   2005  ND2 ASN A 254      -7.212  72.610  -3.442  1.00  0.48           N  
ATOM   2006  N   LEU A 255      -6.728  67.485  -2.977  1.00  0.40           N  
ATOM   2007  CA  LEU A 255      -6.696  66.526  -4.068  1.00  0.40           C  
ATOM   2008  C   LEU A 255      -8.075  65.915  -4.260  1.00  0.40           C  
ATOM   2009  O   LEU A 255      -8.976  66.076  -3.440  1.00  0.40           O  
ATOM   2010  CB  LEU A 255      -5.657  65.397  -3.828  1.00  0.40           C  
ATOM   2011  CG  LEU A 255      -4.187  65.872  -3.823  1.00  0.40           C  
ATOM   2012  CD1 LEU A 255      -3.260  64.727  -3.403  1.00  0.40           C  
ATOM   2013  CD2 LEU A 255      -3.734  66.416  -5.187  1.00  0.40           C  
ATOM   2014  N   ILE A 256      -8.297  65.242  -5.406  1.00  0.40           N  
ATOM   2015  CA  ILE A 256      -9.576  64.656  -5.777  1.00  0.40           C  
ATOM   2016  C   ILE A 256      -9.980  63.488  -4.875  1.00  0.40           C  
ATOM   2017  O   ILE A 256      -9.137  62.700  -4.473  1.00  0.40           O  
ATOM   2018  CB  ILE A 256      -9.625  64.339  -7.276  1.00  0.40           C  
ATOM   2019  CG1 ILE A 256      -9.236  65.604  -8.090  1.00  0.40           C  
ATOM   2020  CG2 ILE A 256     -11.028  63.837  -7.695  1.00  0.40           C  
ATOM   2021  CD1 ILE A 256      -9.157  65.372  -9.603  1.00  0.40           C  
ATOM   2022  N   LEU A 257     -11.287  63.413  -4.504  1.00  0.52           N  
ATOM   2023  CA  LEU A 257     -11.937  62.389  -3.676  1.00  0.52           C  
ATOM   2024  C   LEU A 257     -11.959  62.744  -2.193  1.00  0.52           C  
ATOM   2025  O   LEU A 257     -12.605  62.084  -1.383  1.00  0.52           O  
ATOM   2026  CB  LEU A 257     -11.470  60.923  -3.908  1.00  0.52           C  
ATOM   2027  CG  LEU A 257     -11.684  60.418  -5.352  1.00  0.52           C  
ATOM   2028  CD1 LEU A 257     -10.874  59.144  -5.609  1.00  0.52           C  
ATOM   2029  CD2 LEU A 257     -13.162  60.168  -5.679  1.00  0.52           C  
ATOM   2030  N   LEU A 258     -11.303  63.853  -1.813  1.00  0.55           N  
ATOM   2031  CA  LEU A 258     -11.083  64.225  -0.428  1.00  0.55           C  
ATOM   2032  C   LEU A 258     -12.155  65.112   0.174  1.00  0.55           C  
ATOM   2033  O   LEU A 258     -12.875  65.843  -0.507  1.00  0.55           O  
ATOM   2034  CB  LEU A 258      -9.764  65.021  -0.302  1.00  0.55           C  
ATOM   2035  CG  LEU A 258      -8.501  64.153  -0.235  1.00  0.55           C  
ATOM   2036  CD1 LEU A 258      -8.304  63.162  -1.380  1.00  0.55           C  
ATOM   2037  CD2 LEU A 258      -7.278  65.063  -0.173  1.00  0.55           C  
ATOM   2038  N   GLU A 259     -12.209  65.141   1.523  1.00  0.65           N  
ATOM   2039  CA  GLU A 259     -13.014  66.083   2.282  1.00  0.65           C  
ATOM   2040  C   GLU A 259     -12.614  67.546   2.070  1.00  0.65           C  
ATOM   2041  O   GLU A 259     -13.452  68.443   2.008  1.00  0.65           O  
ATOM   2042  CB  GLU A 259     -13.024  65.719   3.782  1.00  0.65           C  
ATOM   2043  CG  GLU A 259     -11.693  65.955   4.509  1.00  0.65           C  
ATOM   2044  CD  GLU A 259     -11.687  65.418   5.931  1.00  0.65           C  
ATOM   2045  OE1 GLU A 259     -11.911  64.198   6.137  1.00  0.65           O  
ATOM   2046  OE2 GLU A 259     -11.314  66.225   6.826  1.00  0.65           O  
ATOM   2047  N   ARG A 260     -11.308  67.838   1.889  1.00  0.60           N  
ATOM   2048  CA  ARG A 260     -10.847  69.154   1.478  1.00  0.60           C  
ATOM   2049  C   ARG A 260     -11.329  69.575   0.091  1.00  0.60           C  
ATOM   2050  O   ARG A 260     -11.689  70.730  -0.109  1.00  0.60           O  
ATOM   2051  CB  ARG A 260      -9.312  69.303   1.597  1.00  0.60           C  
ATOM   2052  CG  ARG A 260      -8.844  69.434   3.064  1.00  0.60           C  
ATOM   2053  CD  ARG A 260      -7.369  69.821   3.233  1.00  0.60           C  
ATOM   2054  NE  ARG A 260      -7.204  71.204   2.686  1.00  0.60           N  
ATOM   2055  CZ  ARG A 260      -6.047  71.872   2.592  1.00  0.60           C  
ATOM   2056  NH1 ARG A 260      -6.058  73.107   2.092  1.00  0.60           N  
ATOM   2057  NH2 ARG A 260      -4.880  71.364   2.975  1.00  0.60           N  
ATOM   2058  N   LEU A 261     -11.402  68.663  -0.905  1.00  0.61           N  
ATOM   2059  CA  LEU A 261     -12.062  68.989  -2.165  1.00  0.61           C  
ATOM   2060  C   LEU A 261     -13.568  69.174  -2.004  1.00  0.61           C  
ATOM   2061  O   LEU A 261     -14.179  70.033  -2.637  1.00  0.61           O  
ATOM   2062  CB  LEU A 261     -11.783  67.970  -3.294  1.00  0.61           C  
ATOM   2063  CG  LEU A 261     -12.347  68.407  -4.670  1.00  0.61           C  
ATOM   2064  CD1 LEU A 261     -11.663  69.676  -5.201  1.00  0.61           C  
ATOM   2065  CD2 LEU A 261     -12.204  67.307  -5.720  1.00  0.61           C  
ATOM   2066  N   TRP A 262     -14.215  68.399  -1.108  1.00  0.68           N  
ATOM   2067  CA  TRP A 262     -15.615  68.590  -0.758  1.00  0.68           C  
ATOM   2068  C   TRP A 262     -15.893  69.980  -0.219  1.00  0.68           C  
ATOM   2069  O   TRP A 262     -16.879  70.596  -0.601  1.00  0.68           O  
ATOM   2070  CB  TRP A 262     -16.086  67.528   0.262  1.00  0.68           C  
ATOM   2071  CG  TRP A 262     -17.568  67.535   0.606  1.00  0.68           C  
ATOM   2072  CD1 TRP A 262     -18.556  66.819   0.007  1.00  0.68           C  
ATOM   2073  CD2 TRP A 262     -18.190  68.256   1.692  1.00  0.68           C  
ATOM   2074  NE1 TRP A 262     -19.750  67.001   0.671  1.00  0.68           N  
ATOM   2075  CE2 TRP A 262     -19.538  67.839   1.740  1.00  0.68           C  
ATOM   2076  CE3 TRP A 262     -17.695  69.176   2.612  1.00  0.68           C  
ATOM   2077  CZ2 TRP A 262     -20.397  68.301   2.730  1.00  0.68           C  
ATOM   2078  CZ3 TRP A 262     -18.551  69.615   3.632  1.00  0.68           C  
ATOM   2079  CH2 TRP A 262     -19.884  69.183   3.695  1.00  0.68           C  
ATOM   2080  N   TYR A 263     -14.993  70.539   0.616  1.00  0.71           N  
ATOM   2081  CA  TYR A 263     -15.059  71.921   1.065  1.00  0.71           C  
ATOM   2082  C   TYR A 263     -15.118  72.907  -0.118  1.00  0.71           C  
ATOM   2083  O   TYR A 263     -15.993  73.767  -0.166  1.00  0.71           O  
ATOM   2084  CB  TYR A 263     -13.845  72.180   2.016  1.00  0.71           C  
ATOM   2085  CG  TYR A 263     -13.750  73.604   2.488  1.00  0.71           C  
ATOM   2086  CD1 TYR A 263     -14.369  74.022   3.676  1.00  0.71           C  
ATOM   2087  CD2 TYR A 263     -13.090  74.554   1.691  1.00  0.71           C  
ATOM   2088  CE1 TYR A 263     -14.403  75.386   4.009  1.00  0.71           C  
ATOM   2089  CE2 TYR A 263     -13.118  75.910   2.028  1.00  0.71           C  
ATOM   2090  CZ  TYR A 263     -13.799  76.328   3.171  1.00  0.71           C  
ATOM   2091  OH  TYR A 263     -13.922  77.703   3.430  1.00  0.71           O  
ATOM   2092  N   VAL A 264     -14.246  72.743  -1.136  1.00  0.78           N  
ATOM   2093  CA  VAL A 264     -14.239  73.550  -2.356  1.00  0.78           C  
ATOM   2094  C   VAL A 264     -15.512  73.396  -3.194  1.00  0.78           C  
ATOM   2095  O   VAL A 264     -16.108  74.371  -3.652  1.00  0.78           O  
ATOM   2096  CB  VAL A 264     -13.015  73.216  -3.212  1.00  0.78           C  
ATOM   2097  CG1 VAL A 264     -12.971  74.082  -4.489  1.00  0.78           C  
ATOM   2098  CG2 VAL A 264     -11.733  73.451  -2.387  1.00  0.78           C  
ATOM   2099  N   MET A 265     -16.009  72.158  -3.389  1.00  0.78           N  
ATOM   2100  CA  MET A 265     -17.276  71.905  -4.068  1.00  0.78           C  
ATOM   2101  C   MET A 265     -18.472  72.482  -3.323  1.00  0.78           C  
ATOM   2102  O   MET A 265     -19.399  73.047  -3.903  1.00  0.78           O  
ATOM   2103  CB  MET A 265     -17.503  70.390  -4.291  1.00  0.78           C  
ATOM   2104  CG  MET A 265     -16.520  69.748  -5.294  1.00  0.78           C  
ATOM   2105  SD  MET A 265     -16.450  70.511  -6.947  1.00  0.78           S  
ATOM   2106  CE  MET A 265     -18.195  70.285  -7.403  1.00  0.78           C  
ATOM   2107  N   LEU A 266     -18.471  72.386  -1.982  1.00  0.81           N  
ATOM   2108  CA  LEU A 266     -19.451  73.035  -1.141  1.00  0.81           C  
ATOM   2109  C   LEU A 266     -19.419  74.537  -1.249  1.00  0.81           C  
ATOM   2110  O   LEU A 266     -20.470  75.139  -1.396  1.00  0.81           O  
ATOM   2111  CB  LEU A 266     -19.306  72.633   0.341  1.00  0.81           C  
ATOM   2112  CG  LEU A 266     -20.261  71.530   0.811  1.00  0.81           C  
ATOM   2113  CD1 LEU A 266     -21.709  72.032   0.926  1.00  0.81           C  
ATOM   2114  CD2 LEU A 266     -20.162  70.315  -0.092  1.00  0.81           C  
ATOM   2115  N   GLU A 267     -18.238  75.176  -1.254  1.00  0.79           N  
ATOM   2116  CA  GLU A 267     -18.067  76.614  -1.405  1.00  0.79           C  
ATOM   2117  C   GLU A 267     -18.754  77.132  -2.676  1.00  0.79           C  
ATOM   2118  O   GLU A 267     -19.548  78.072  -2.654  1.00  0.79           O  
ATOM   2119  CB  GLU A 267     -16.539  76.862  -1.410  1.00  0.79           C  
ATOM   2120  CG  GLU A 267     -16.050  78.324  -1.351  1.00  0.79           C  
ATOM   2121  CD  GLU A 267     -14.520  78.349  -1.337  1.00  0.79           C  
ATOM   2122  OE1 GLU A 267     -13.928  77.976  -0.289  1.00  0.79           O  
ATOM   2123  OE2 GLU A 267     -13.928  78.704  -2.391  1.00  0.79           O  
ATOM   2124  N   GLN A 268     -18.574  76.411  -3.803  1.00  0.80           N  
ATOM   2125  CA  GLN A 268     -19.306  76.621  -5.043  1.00  0.80           C  
ATOM   2126  C   GLN A 268     -20.821  76.394  -4.954  1.00  0.80           C  
ATOM   2127  O   GLN A 268     -21.612  77.191  -5.464  1.00  0.80           O  
ATOM   2128  CB  GLN A 268     -18.705  75.731  -6.156  1.00  0.80           C  
ATOM   2129  CG  GLN A 268     -17.227  76.085  -6.441  1.00  0.80           C  
ATOM   2130  CD  GLN A 268     -16.634  75.221  -7.551  1.00  0.80           C  
ATOM   2131  OE1 GLN A 268     -17.208  74.252  -8.039  1.00  0.80           O  
ATOM   2132  NE2 GLN A 268     -15.413  75.601  -7.995  1.00  0.80           N  
ATOM   2133  N   PHE A 269     -21.277  75.322  -4.265  1.00  0.81           N  
ATOM   2134  CA  PHE A 269     -22.684  75.073  -3.966  1.00  0.81           C  
ATOM   2135  C   PHE A 269     -23.320  76.192  -3.148  1.00  0.81           C  
ATOM   2136  O   PHE A 269     -24.427  76.638  -3.448  1.00  0.81           O  
ATOM   2137  CB  PHE A 269     -22.849  73.706  -3.218  1.00  0.81           C  
ATOM   2138  CG  PHE A 269     -24.267  73.435  -2.763  1.00  0.81           C  
ATOM   2139  CD1 PHE A 269     -25.258  73.097  -3.691  1.00  0.81           C  
ATOM   2140  CD2 PHE A 269     -24.635  73.622  -1.418  1.00  0.81           C  
ATOM   2141  CE1 PHE A 269     -26.596  72.979  -3.297  1.00  0.81           C  
ATOM   2142  CE2 PHE A 269     -25.974  73.509  -1.018  1.00  0.81           C  
ATOM   2143  CZ  PHE A 269     -26.958  73.192  -1.963  1.00  0.81           C  
ATOM   2144  N   LEU A 270     -22.631  76.686  -2.103  1.00  0.82           N  
ATOM   2145  CA  LEU A 270     -23.141  77.723  -1.233  1.00  0.82           C  
ATOM   2146  C   LEU A 270     -23.411  79.014  -1.956  1.00  0.82           C  
ATOM   2147  O   LEU A 270     -24.468  79.609  -1.784  1.00  0.82           O  
ATOM   2148  CB  LEU A 270     -22.177  78.035  -0.076  1.00  0.82           C  
ATOM   2149  CG  LEU A 270     -21.919  76.866   0.883  1.00  0.82           C  
ATOM   2150  CD1 LEU A 270     -21.044  77.388   2.017  1.00  0.82           C  
ATOM   2151  CD2 LEU A 270     -23.193  76.170   1.383  1.00  0.82           C  
ATOM   2152  N   MET A 271     -22.497  79.446  -2.842  1.00  0.81           N  
ATOM   2153  CA  MET A 271     -22.695  80.628  -3.658  1.00  0.81           C  
ATOM   2154  C   MET A 271     -23.927  80.514  -4.555  1.00  0.81           C  
ATOM   2155  O   MET A 271     -24.768  81.409  -4.592  1.00  0.81           O  
ATOM   2156  CB  MET A 271     -21.432  80.879  -4.513  1.00  0.81           C  
ATOM   2157  CG  MET A 271     -20.172  81.173  -3.671  1.00  0.81           C  
ATOM   2158  SD  MET A 271     -18.615  81.024  -4.601  1.00  0.81           S  
ATOM   2159  CE  MET A 271     -18.727  82.618  -5.455  1.00  0.81           C  
ATOM   2160  N   LYS A 272     -24.121  79.361  -5.232  1.00  0.78           N  
ATOM   2161  CA  LYS A 272     -25.318  79.098  -6.017  1.00  0.78           C  
ATOM   2162  C   LYS A 272     -26.612  79.058  -5.199  1.00  0.78           C  
ATOM   2163  O   LYS A 272     -27.622  79.654  -5.577  1.00  0.78           O  
ATOM   2164  CB  LYS A 272     -25.194  77.751  -6.773  1.00  0.78           C  
ATOM   2165  CG  LYS A 272     -24.107  77.730  -7.861  1.00  0.78           C  
ATOM   2166  CD  LYS A 272     -24.071  76.373  -8.591  1.00  0.78           C  
ATOM   2167  CE  LYS A 272     -23.083  76.318  -9.765  1.00  0.78           C  
ATOM   2168  NZ  LYS A 272     -23.103  74.983 -10.399  1.00  0.78           N  
ATOM   2169  N   TYR A 273     -26.608  78.370  -4.037  1.00  0.77           N  
ATOM   2170  CA  TYR A 273     -27.729  78.298  -3.112  1.00  0.77           C  
ATOM   2171  C   TYR A 273     -28.112  79.668  -2.567  1.00  0.77           C  
ATOM   2172  O   TYR A 273     -29.275  80.061  -2.563  1.00  0.77           O  
ATOM   2173  CB  TYR A 273     -27.343  77.342  -1.940  1.00  0.77           C  
ATOM   2174  CG  TYR A 273     -28.418  77.225  -0.885  1.00  0.77           C  
ATOM   2175  CD1 TYR A 273     -29.588  76.490  -1.130  1.00  0.77           C  
ATOM   2176  CD2 TYR A 273     -28.283  77.907   0.338  1.00  0.77           C  
ATOM   2177  CE1 TYR A 273     -30.612  76.446  -0.171  1.00  0.77           C  
ATOM   2178  CE2 TYR A 273     -29.306  77.866   1.296  1.00  0.77           C  
ATOM   2179  CZ  TYR A 273     -30.472  77.136   1.037  1.00  0.77           C  
ATOM   2180  OH  TYR A 273     -31.513  77.101   1.984  1.00  0.77           O  
ATOM   2181  N   VAL A 274     -27.120  80.447  -2.122  1.00  0.81           N  
ATOM   2182  CA  VAL A 274     -27.317  81.769  -1.577  1.00  0.81           C  
ATOM   2183  C   VAL A 274     -27.787  82.792  -2.598  1.00  0.81           C  
ATOM   2184  O   VAL A 274     -28.701  83.572  -2.332  1.00  0.81           O  
ATOM   2185  CB  VAL A 274     -26.063  82.209  -0.862  1.00  0.81           C  
ATOM   2186  CG1 VAL A 274     -26.183  83.675  -0.452  1.00  0.81           C  
ATOM   2187  CG2 VAL A 274     -25.915  81.331   0.397  1.00  0.81           C  
ATOM   2188  N   TRP A 275     -27.224  82.804  -3.823  1.00  0.73           N  
ATOM   2189  CA  TRP A 275     -27.720  83.650  -4.899  1.00  0.73           C  
ATOM   2190  C   TRP A 275     -29.153  83.309  -5.292  1.00  0.73           C  
ATOM   2191  O   TRP A 275     -29.979  84.188  -5.530  1.00  0.73           O  
ATOM   2192  CB  TRP A 275     -26.797  83.584  -6.139  1.00  0.73           C  
ATOM   2193  CG  TRP A 275     -25.394  84.138  -5.928  1.00  0.73           C  
ATOM   2194  CD1 TRP A 275     -24.948  85.100  -5.059  1.00  0.73           C  
ATOM   2195  CD2 TRP A 275     -24.245  83.708  -6.680  1.00  0.73           C  
ATOM   2196  NE1 TRP A 275     -23.593  85.300  -5.223  1.00  0.73           N  
ATOM   2197  CE2 TRP A 275     -23.143  84.458  -6.215  1.00  0.73           C  
ATOM   2198  CE3 TRP A 275     -24.096  82.760  -7.691  1.00  0.73           C  
ATOM   2199  CZ2 TRP A 275     -21.879  84.278  -6.759  1.00  0.73           C  
ATOM   2200  CZ3 TRP A 275     -22.817  82.574  -8.235  1.00  0.73           C  
ATOM   2201  CH2 TRP A 275     -21.724  83.326  -7.780  1.00  0.73           C  
ATOM   2202  N   SER A 276     -29.501  82.007  -5.302  1.00  0.77           N  
ATOM   2203  CA  SER A 276     -30.873  81.545  -5.474  1.00  0.77           C  
ATOM   2204  C   SER A 276     -31.791  81.979  -4.345  1.00  0.77           C  
ATOM   2205  O   SER A 276     -32.881  82.482  -4.588  1.00  0.77           O  
ATOM   2206  CB  SER A 276     -30.977  80.006  -5.594  1.00  0.77           C  
ATOM   2207  OG  SER A 276     -30.208  79.534  -6.699  1.00  0.77           O  
ATOM   2208  N   ALA A 277     -31.356  81.868  -3.071  1.00  0.79           N  
ATOM   2209  CA  ALA A 277     -32.078  82.353  -1.904  1.00  0.79           C  
ATOM   2210  C   ALA A 277     -32.323  83.860  -1.933  1.00  0.79           C  
ATOM   2211  O   ALA A 277     -33.408  84.341  -1.609  1.00  0.79           O  
ATOM   2212  CB  ALA A 277     -31.309  81.973  -0.623  1.00  0.79           C  
ATOM   2213  N   SER A 278     -31.319  84.636  -2.391  1.00  0.75           N  
ATOM   2214  CA  SER A 278     -31.454  86.060  -2.679  1.00  0.75           C  
ATOM   2215  C   SER A 278     -32.504  86.346  -3.715  1.00  0.75           C  
ATOM   2216  O   SER A 278     -33.379  87.179  -3.513  1.00  0.75           O  
ATOM   2217  CB  SER A 278     -30.159  86.650  -3.281  1.00  0.75           C  
ATOM   2218  OG  SER A 278     -30.137  88.076  -3.177  1.00  0.75           O  
ATOM   2219  N   GLY A 279     -32.476  85.599  -4.840  1.00  0.77           N  
ATOM   2220  CA  GLY A 279     -33.441  85.758  -5.913  1.00  0.77           C  
ATOM   2221  C   GLY A 279     -34.832  85.395  -5.495  1.00  0.77           C  
ATOM   2222  O   GLY A 279     -35.779  86.072  -5.859  1.00  0.77           O  
ATOM   2223  N   LEU A 280     -35.008  84.361  -4.660  1.00  0.68           N  
ATOM   2224  CA  LEU A 280     -36.297  84.034  -4.082  1.00  0.68           C  
ATOM   2225  C   LEU A 280     -36.835  85.114  -3.148  1.00  0.68           C  
ATOM   2226  O   LEU A 280     -37.991  85.512  -3.262  1.00  0.68           O  
ATOM   2227  CB  LEU A 280     -36.229  82.674  -3.346  1.00  0.68           C  
ATOM   2228  CG  LEU A 280     -35.961  81.474  -4.282  1.00  0.68           C  
ATOM   2229  CD1 LEU A 280     -35.581  80.223  -3.477  1.00  0.68           C  
ATOM   2230  CD2 LEU A 280     -37.146  81.173  -5.209  1.00  0.68           C  
ATOM   2231  N   LEU A 281     -36.005  85.665  -2.236  1.00  0.68           N  
ATOM   2232  CA  LEU A 281     -36.394  86.765  -1.362  1.00  0.68           C  
ATOM   2233  C   LEU A 281     -36.678  88.067  -2.115  1.00  0.68           C  
ATOM   2234  O   LEU A 281     -37.688  88.738  -1.896  1.00  0.68           O  
ATOM   2235  CB  LEU A 281     -35.284  86.987  -0.299  1.00  0.68           C  
ATOM   2236  CG  LEU A 281     -35.594  88.019   0.811  1.00  0.68           C  
ATOM   2237  CD1 LEU A 281     -36.834  87.640   1.636  1.00  0.68           C  
ATOM   2238  CD2 LEU A 281     -34.379  88.180   1.740  1.00  0.68           C  
ATOM   2239  N   MET A 282     -35.800  88.421  -3.074  1.00  0.65           N  
ATOM   2240  CA  MET A 282     -35.871  89.625  -3.880  1.00  0.65           C  
ATOM   2241  C   MET A 282     -36.926  89.550  -4.974  1.00  0.65           C  
ATOM   2242  O   MET A 282     -37.349  90.564  -5.511  1.00  0.65           O  
ATOM   2243  CB  MET A 282     -34.489  89.886  -4.529  1.00  0.65           C  
ATOM   2244  CG  MET A 282     -34.285  91.292  -5.130  1.00  0.65           C  
ATOM   2245  SD  MET A 282     -32.831  91.415  -6.215  1.00  0.65           S  
ATOM   2246  CE  MET A 282     -33.571  90.473  -7.585  1.00  0.65           C  
ATOM   2247  N   VAL A 283     -37.410  88.353  -5.339  1.00  0.70           N  
ATOM   2248  CA  VAL A 283     -38.611  88.206  -6.147  1.00  0.70           C  
ATOM   2249  C   VAL A 283     -39.865  88.240  -5.291  1.00  0.70           C  
ATOM   2250  O   VAL A 283     -40.831  88.935  -5.606  1.00  0.70           O  
ATOM   2251  CB  VAL A 283     -38.535  86.926  -6.970  1.00  0.70           C  
ATOM   2252  CG1 VAL A 283     -39.900  86.484  -7.518  1.00  0.70           C  
ATOM   2253  CG2 VAL A 283     -37.569  87.195  -8.141  1.00  0.70           C  
ATOM   2254  N   ALA A 284     -39.888  87.495  -4.164  1.00  0.71           N  
ATOM   2255  CA  ALA A 284     -41.074  87.330  -3.347  1.00  0.71           C  
ATOM   2256  C   ALA A 284     -41.614  88.612  -2.747  1.00  0.71           C  
ATOM   2257  O   ALA A 284     -42.818  88.865  -2.790  1.00  0.71           O  
ATOM   2258  CB  ALA A 284     -40.794  86.335  -2.204  1.00  0.71           C  
ATOM   2259  N   VAL A 285     -40.739  89.472  -2.185  1.00  0.66           N  
ATOM   2260  CA  VAL A 285     -41.206  90.732  -1.638  1.00  0.66           C  
ATOM   2261  C   VAL A 285     -41.719  91.703  -2.714  1.00  0.66           C  
ATOM   2262  O   VAL A 285     -42.851  92.141  -2.544  1.00  0.66           O  
ATOM   2263  CB  VAL A 285     -40.238  91.351  -0.634  1.00  0.66           C  
ATOM   2264  CG1 VAL A 285     -40.942  92.508   0.094  1.00  0.66           C  
ATOM   2265  CG2 VAL A 285     -39.819  90.291   0.405  1.00  0.66           C  
ATOM   2266  N   PRO A 286     -41.070  92.017  -3.842  1.00  0.70           N  
ATOM   2267  CA  PRO A 286     -41.659  92.703  -4.999  1.00  0.70           C  
ATOM   2268  C   PRO A 286     -43.020  92.276  -5.504  1.00  0.70           C  
ATOM   2269  O   PRO A 286     -43.793  93.135  -5.920  1.00  0.70           O  
ATOM   2270  CB  PRO A 286     -40.551  92.631  -6.042  1.00  0.70           C  
ATOM   2271  CG  PRO A 286     -39.335  92.922  -5.170  1.00  0.70           C  
ATOM   2272  CD  PRO A 286     -39.612  92.062  -3.932  1.00  0.70           C  
ATOM   2273  N   ILE A 287     -43.362  90.973  -5.498  1.00  0.65           N  
ATOM   2274  CA  ILE A 287     -44.705  90.505  -5.842  1.00  0.65           C  
ATOM   2275  C   ILE A 287     -45.760  91.020  -4.858  1.00  0.65           C  
ATOM   2276  O   ILE A 287     -46.868  91.414  -5.234  1.00  0.65           O  
ATOM   2277  CB  ILE A 287     -44.754  88.983  -5.980  1.00  0.65           C  
ATOM   2278  CG1 ILE A 287     -43.833  88.526  -7.138  1.00  0.65           C  
ATOM   2279  CG2 ILE A 287     -46.203  88.505  -6.242  1.00  0.65           C  
ATOM   2280  CD1 ILE A 287     -43.573  87.015  -7.139  1.00  0.65           C  
ATOM   2281  N   ILE A 288     -45.428  91.062  -3.554  1.00  0.62           N  
ATOM   2282  CA  ILE A 288     -46.221  91.746  -2.542  1.00  0.62           C  
ATOM   2283  C   ILE A 288     -46.175  93.267  -2.712  1.00  0.62           C  
ATOM   2284  O   ILE A 288     -47.199  93.945  -2.673  1.00  0.62           O  
ATOM   2285  CB  ILE A 288     -45.733  91.375  -1.134  1.00  0.62           C  
ATOM   2286  CG1 ILE A 288     -45.797  89.844  -0.906  1.00  0.62           C  
ATOM   2287  CG2 ILE A 288     -46.546  92.131  -0.055  1.00  0.62           C  
ATOM   2288  CD1 ILE A 288     -45.006  89.381   0.325  1.00  0.62           C  
ATOM   2289  N   THR A 289     -44.971  93.838  -2.908  1.00  0.66           N  
ATOM   2290  CA  THR A 289     -44.703  95.267  -2.818  1.00  0.66           C  
ATOM   2291  C   THR A 289     -44.781  95.989  -4.151  1.00  0.66           C  
ATOM   2292  O   THR A 289     -45.856  96.400  -4.580  1.00  0.66           O  
ATOM   2293  CB  THR A 289     -43.378  95.588  -2.096  1.00  0.66           C  
ATOM   2294  OG1 THR A 289     -42.219  95.030  -2.697  1.00  0.66           O  
ATOM   2295  CG2 THR A 289     -43.439  95.004  -0.678  1.00  0.66           C  
ATOM   2296  N   ALA A 290     -43.630  96.183  -4.816  1.00  0.68           N  
ATOM   2297  CA  ALA A 290     -43.451  97.000  -5.990  1.00  0.68           C  
ATOM   2298  C   ALA A 290     -42.716  96.191  -7.052  1.00  0.68           C  
ATOM   2299  O   ALA A 290     -41.627  95.683  -6.810  1.00  0.68           O  
ATOM   2300  CB  ALA A 290     -42.597  98.220  -5.607  1.00  0.68           C  
ATOM   2301  N   THR A 291     -43.252  95.974  -8.265  1.00  0.68           N  
ATOM   2302  CA  THR A 291     -44.427  96.560  -8.907  1.00  0.68           C  
ATOM   2303  C   THR A 291     -45.669  95.710  -8.707  1.00  0.68           C  
ATOM   2304  O   THR A 291     -46.618  95.745  -9.490  1.00  0.68           O  
ATOM   2305  CB  THR A 291     -44.203  96.741 -10.403  1.00  0.68           C  
ATOM   2306  OG1 THR A 291     -43.719  95.545 -11.010  1.00  0.68           O  
ATOM   2307  CG2 THR A 291     -43.119  97.808 -10.614  1.00  0.68           C  
ATOM   2308  N   GLY A 292     -45.668  94.892  -7.639  1.00  0.74           N  
ATOM   2309  CA  GLY A 292     -46.717  93.960  -7.266  1.00  0.74           C  
ATOM   2310  C   GLY A 292     -48.041  94.510  -6.804  1.00  0.74           C  
ATOM   2311  O   GLY A 292     -48.514  95.582  -7.189  1.00  0.74           O  
ATOM   2312  N   TYR A 293     -48.738  93.714  -5.966  1.00  0.65           N  
ATOM   2313  CA  TYR A 293     -50.097  94.027  -5.562  1.00  0.65           C  
ATOM   2314  C   TYR A 293     -50.214  95.326  -4.775  1.00  0.65           C  
ATOM   2315  O   TYR A 293     -51.036  96.178  -5.088  1.00  0.65           O  
ATOM   2316  CB  TYR A 293     -50.749  92.856  -4.759  1.00  0.65           C  
ATOM   2317  CG  TYR A 293     -52.191  93.182  -4.424  1.00  0.65           C  
ATOM   2318  CD1 TYR A 293     -53.096  93.471  -5.460  1.00  0.65           C  
ATOM   2319  CD2 TYR A 293     -52.593  93.390  -3.091  1.00  0.65           C  
ATOM   2320  CE1 TYR A 293     -54.356  94.005  -5.170  1.00  0.65           C  
ATOM   2321  CE2 TYR A 293     -53.872  93.892  -2.801  1.00  0.65           C  
ATOM   2322  CZ  TYR A 293     -54.743  94.204  -3.848  1.00  0.65           C  
ATOM   2323  OH  TYR A 293     -56.019  94.731  -3.601  1.00  0.65           O  
ATOM   2324  N   SER A 294     -49.377  95.548  -3.754  1.00  0.68           N  
ATOM   2325  CA  SER A 294     -49.617  96.663  -2.855  1.00  0.68           C  
ATOM   2326  C   SER A 294     -49.187  98.005  -3.422  1.00  0.68           C  
ATOM   2327  O   SER A 294     -49.627  99.057  -2.957  1.00  0.68           O  
ATOM   2328  CB  SER A 294     -48.967  96.423  -1.479  1.00  0.68           C  
ATOM   2329  OG  SER A 294     -49.466  95.212  -0.907  1.00  0.68           O  
ATOM   2330  N   GLU A 295     -48.351  98.033  -4.482  1.00  0.65           N  
ATOM   2331  CA  GLU A 295     -48.201  99.219  -5.307  1.00  0.65           C  
ATOM   2332  C   GLU A 295     -49.424  99.540  -6.154  1.00  0.65           C  
ATOM   2333  O   GLU A 295     -49.950 100.655  -6.130  1.00  0.65           O  
ATOM   2334  CB  GLU A 295     -46.964  99.103  -6.235  1.00  0.65           C  
ATOM   2335  CG  GLU A 295     -46.853 100.327  -7.178  1.00  0.65           C  
ATOM   2336  CD  GLU A 295     -45.522 100.563  -7.880  1.00  0.65           C  
ATOM   2337  OE1 GLU A 295     -44.578  99.756  -7.717  1.00  0.65           O  
ATOM   2338  OE2 GLU A 295     -45.457 101.607  -8.585  1.00  0.65           O  
ATOM   2339  N   SER A 296     -49.929  98.542  -6.902  1.00  0.69           N  
ATOM   2340  CA  SER A 296     -51.058  98.691  -7.813  1.00  0.69           C  
ATOM   2341  C   SER A 296     -52.374  98.963  -7.107  1.00  0.69           C  
ATOM   2342  O   SER A 296     -53.168  99.799  -7.539  1.00  0.69           O  
ATOM   2343  CB  SER A 296     -51.173  97.509  -8.815  1.00  0.69           C  
ATOM   2344  OG  SER A 296     -51.175  96.231  -8.175  1.00  0.69           O  
ATOM   2345  N   ASP A 297     -52.611  98.312  -5.956  1.00  0.68           N  
ATOM   2346  CA  ASP A 297     -53.718  98.593  -5.067  1.00  0.68           C  
ATOM   2347  C   ASP A 297     -53.711 100.018  -4.513  1.00  0.68           C  
ATOM   2348  O   ASP A 297     -54.726 100.705  -4.508  1.00  0.68           O  
ATOM   2349  CB  ASP A 297     -53.654  97.594  -3.898  1.00  0.68           C  
ATOM   2350  CG  ASP A 297     -54.865  97.768  -3.009  1.00  0.68           C  
ATOM   2351  OD1 ASP A 297     -55.972  97.324  -3.414  1.00  0.68           O  
ATOM   2352  OD2 ASP A 297     -54.691  98.377  -1.927  1.00  0.68           O  
ATOM   2353  N   ALA A 298     -52.548 100.529  -4.068  1.00  0.67           N  
ATOM   2354  CA  ALA A 298     -52.442 101.848  -3.480  1.00  0.67           C  
ATOM   2355  C   ALA A 298     -52.859 102.978  -4.418  1.00  0.67           C  
ATOM   2356  O   ALA A 298     -53.412 103.994  -3.999  1.00  0.67           O  
ATOM   2357  CB  ALA A 298     -51.000 102.059  -2.992  1.00  0.67           C  
ATOM   2358  N   GLU A 299     -52.608 102.806  -5.729  1.00  0.60           N  
ATOM   2359  CA  GLU A 299     -53.221 103.622  -6.757  1.00  0.60           C  
ATOM   2360  C   GLU A 299     -54.719 103.416  -6.919  1.00  0.60           C  
ATOM   2361  O   GLU A 299     -55.473 104.381  -6.963  1.00  0.60           O  
ATOM   2362  CB  GLU A 299     -52.525 103.351  -8.097  1.00  0.60           C  
ATOM   2363  CG  GLU A 299     -53.054 104.220  -9.265  1.00  0.60           C  
ATOM   2364  CD  GLU A 299     -51.983 104.396 -10.318  1.00  0.60           C  
ATOM   2365  OE1 GLU A 299     -51.143 103.475 -10.472  1.00  0.60           O  
ATOM   2366  OE2 GLU A 299     -51.853 105.514 -10.876  1.00  0.60           O  
ATOM   2367  N   ALA A 300     -55.194 102.155  -6.954  1.00  0.61           N  
ATOM   2368  CA  ALA A 300     -56.590 101.787  -7.104  1.00  0.61           C  
ATOM   2369  C   ALA A 300     -57.513 102.309  -6.002  1.00  0.61           C  
ATOM   2370  O   ALA A 300     -58.624 102.764  -6.268  1.00  0.61           O  
ATOM   2371  CB  ALA A 300     -56.691 100.250  -7.187  1.00  0.61           C  
ATOM   2372  N   VAL A 301     -57.060 102.289  -4.735  1.00  0.58           N  
ATOM   2373  CA  VAL A 301     -57.758 102.868  -3.593  1.00  0.58           C  
ATOM   2374  C   VAL A 301     -57.965 104.374  -3.740  1.00  0.58           C  
ATOM   2375  O   VAL A 301     -58.978 104.953  -3.344  1.00  0.58           O  
ATOM   2376  CB  VAL A 301     -57.030 102.534  -2.286  1.00  0.58           C  
ATOM   2377  CG1 VAL A 301     -57.686 103.216  -1.066  1.00  0.58           C  
ATOM   2378  CG2 VAL A 301     -57.058 101.008  -2.076  1.00  0.58           C  
ATOM   2379  N   LYS A 302     -56.974 105.063  -4.323  1.00  0.45           N  
ATOM   2380  CA  LYS A 302     -57.014 106.483  -4.567  1.00  0.45           C  
ATOM   2381  C   LYS A 302     -57.910 106.893  -5.746  1.00  0.45           C  
ATOM   2382  O   LYS A 302     -58.066 106.200  -6.748  1.00  0.45           O  
ATOM   2383  CB  LYS A 302     -55.563 106.971  -4.787  1.00  0.45           C  
ATOM   2384  CG  LYS A 302     -55.352 108.488  -4.709  1.00  0.45           C  
ATOM   2385  CD  LYS A 302     -53.959 108.867  -5.223  1.00  0.45           C  
ATOM   2386  CE  LYS A 302     -53.835 110.351  -5.556  1.00  0.45           C  
ATOM   2387  NZ  LYS A 302     -52.483 110.606  -6.087  1.00  0.45           N  
ATOM   2388  N   LYS A 303     -58.528 108.090  -5.665  1.00  0.33           N  
ATOM   2389  CA  LYS A 303     -59.114 108.756  -6.816  1.00  0.33           C  
ATOM   2390  C   LYS A 303     -58.082 109.122  -7.884  1.00  0.33           C  
ATOM   2391  O   LYS A 303     -56.925 109.397  -7.564  1.00  0.33           O  
ATOM   2392  CB  LYS A 303     -59.872 110.036  -6.399  1.00  0.33           C  
ATOM   2393  CG  LYS A 303     -61.058 109.760  -5.465  1.00  0.33           C  
ATOM   2394  CD  LYS A 303     -61.807 111.053  -5.111  1.00  0.33           C  
ATOM   2395  CE  LYS A 303     -62.991 110.825  -4.170  1.00  0.33           C  
ATOM   2396  NZ  LYS A 303     -63.642 112.118  -3.860  1.00  0.33           N  
ATOM   2397  N   ALA A 304     -58.513 109.110  -9.163  1.00  0.31           N  
ATOM   2398  CA  ALA A 304     -57.728 109.406 -10.356  1.00  0.31           C  
ATOM   2399  C   ALA A 304     -56.995 108.190 -10.910  1.00  0.31           C  
ATOM   2400  O   ALA A 304     -56.190 108.282 -11.828  1.00  0.31           O  
ATOM   2401  CB  ALA A 304     -56.782 110.625 -10.232  1.00  0.31           C  
ATOM   2402  N   ALA A 305     -57.325 106.967 -10.449  1.00  0.40           N  
ATOM   2403  CA  ALA A 305     -56.669 105.759 -10.923  1.00  0.40           C  
ATOM   2404  C   ALA A 305     -57.062 105.362 -12.346  1.00  0.40           C  
ATOM   2405  O   ALA A 305     -56.415 104.543 -12.995  1.00  0.40           O  
ATOM   2406  CB  ALA A 305     -57.016 104.611  -9.960  1.00  0.40           C  
ATOM   2407  N   LEU A 306     -58.155 105.951 -12.865  1.00  0.30           N  
ATOM   2408  CA  LEU A 306     -58.634 105.745 -14.216  1.00  0.30           C  
ATOM   2409  C   LEU A 306     -58.678 107.064 -14.978  1.00  0.30           C  
ATOM   2410  O   LEU A 306     -59.420 107.209 -15.955  1.00  0.30           O  
ATOM   2411  CB  LEU A 306     -60.031 105.069 -14.199  1.00  0.30           C  
ATOM   2412  CG  LEU A 306     -60.052 103.677 -13.527  1.00  0.30           C  
ATOM   2413  CD1 LEU A 306     -61.487 103.141 -13.435  1.00  0.30           C  
ATOM   2414  CD2 LEU A 306     -59.156 102.654 -14.244  1.00  0.30           C  
ATOM   2415  N   GLU A 307     -57.883 108.076 -14.556  1.00  0.30           N  
ATOM   2416  CA  GLU A 307     -57.835 109.377 -15.203  1.00  0.30           C  
ATOM   2417  C   GLU A 307     -57.404 109.321 -16.680  1.00  0.30           C  
ATOM   2418  O   GLU A 307     -56.576 108.514 -17.092  1.00  0.30           O  
ATOM   2419  CB  GLU A 307     -56.962 110.395 -14.416  1.00  0.30           C  
ATOM   2420  CG  GLU A 307     -55.425 110.174 -14.455  1.00  0.30           C  
ATOM   2421  CD  GLU A 307     -54.676 111.408 -13.963  1.00  0.30           C  
ATOM   2422  OE1 GLU A 307     -54.705 112.423 -14.714  1.00  0.30           O  
ATOM   2423  OE2 GLU A 307     -54.092 111.403 -12.856  1.00  0.30           O  
ATOM   2424  N   LYS A 308     -57.960 110.127 -17.607  1.00  0.30           N  
ATOM   2425  CA  LYS A 308     -59.010 111.123 -17.482  1.00  0.30           C  
ATOM   2426  C   LYS A 308     -60.362 110.565 -17.891  1.00  0.30           C  
ATOM   2427  O   LYS A 308     -61.284 111.315 -18.195  1.00  0.30           O  
ATOM   2428  CB  LYS A 308     -58.707 112.350 -18.391  1.00  0.30           C  
ATOM   2429  CG  LYS A 308     -57.458 113.153 -17.992  1.00  0.30           C  
ATOM   2430  CD  LYS A 308     -57.614 113.785 -16.599  1.00  0.30           C  
ATOM   2431  CE  LYS A 308     -56.384 114.550 -16.112  1.00  0.30           C  
ATOM   2432  NZ  LYS A 308     -56.295 114.439 -14.641  1.00  0.30           N  
ATOM   2433  N   LYS A 309     -60.528 109.226 -17.936  1.00  0.30           N  
ATOM   2434  CA  LYS A 309     -61.824 108.635 -18.222  1.00  0.30           C  
ATOM   2435  C   LYS A 309     -62.814 108.824 -17.090  1.00  0.30           C  
ATOM   2436  O   LYS A 309     -63.940 109.252 -17.320  1.00  0.30           O  
ATOM   2437  CB  LYS A 309     -61.704 107.123 -18.521  1.00  0.30           C  
ATOM   2438  CG  LYS A 309     -60.913 106.824 -19.801  1.00  0.30           C  
ATOM   2439  CD  LYS A 309     -60.845 105.315 -20.080  1.00  0.30           C  
ATOM   2440  CE  LYS A 309     -60.125 104.985 -21.389  1.00  0.30           C  
ATOM   2441  NZ  LYS A 309     -60.070 103.519 -21.585  1.00  0.30           N  
ATOM   2442  N   GLU A 310     -62.391 108.548 -15.841  1.00  0.30           N  
ATOM   2443  CA  GLU A 310     -63.215 108.836 -14.691  1.00  0.30           C  
ATOM   2444  C   GLU A 310     -62.345 108.905 -13.455  1.00  0.30           C  
ATOM   2445  O   GLU A 310     -61.280 108.296 -13.385  1.00  0.30           O  
ATOM   2446  CB  GLU A 310     -64.364 107.812 -14.519  1.00  0.30           C  
ATOM   2447  CG  GLU A 310     -65.508 108.306 -13.599  1.00  0.30           C  
ATOM   2448  CD  GLU A 310     -66.877 107.739 -13.981  1.00  0.30           C  
ATOM   2449  OE1 GLU A 310     -66.939 106.766 -14.772  1.00  0.30           O  
ATOM   2450  OE2 GLU A 310     -67.874 108.335 -13.496  1.00  0.30           O  
ATOM   2451  N   GLU A 311     -62.777 109.673 -12.439  1.00  0.27           N  
ATOM   2452  CA  GLU A 311     -61.971 109.975 -11.272  1.00  0.27           C  
ATOM   2453  C   GLU A 311     -62.375 109.127 -10.065  1.00  0.27           C  
ATOM   2454  O   GLU A 311     -61.906 109.341  -8.946  1.00  0.27           O  
ATOM   2455  CB  GLU A 311     -62.095 111.484 -10.934  1.00  0.27           C  
ATOM   2456  CG  GLU A 311     -61.652 112.443 -12.082  1.00  0.27           C  
ATOM   2457  CD  GLU A 311     -60.162 112.378 -12.435  1.00  0.27           C  
ATOM   2458  OE1 GLU A 311     -59.362 112.061 -11.523  1.00  0.27           O  
ATOM   2459  OE2 GLU A 311     -59.804 112.684 -13.607  1.00  0.27           O  
ATOM   2460  N   GLU A 312     -63.268 108.129 -10.257  1.00  0.30           N  
ATOM   2461  CA  GLU A 312     -63.711 107.194  -9.230  1.00  0.30           C  
ATOM   2462  C   GLU A 312     -62.595 106.311  -8.653  1.00  0.30           C  
ATOM   2463  O   GLU A 312     -61.591 106.016  -9.302  1.00  0.30           O  
ATOM   2464  CB  GLU A 312     -64.923 106.340  -9.699  1.00  0.30           C  
ATOM   2465  CG  GLU A 312     -65.673 105.624  -8.540  1.00  0.30           C  
ATOM   2466  CD  GLU A 312     -66.955 104.900  -8.956  1.00  0.30           C  
ATOM   2467  OE1 GLU A 312     -66.877 103.986  -9.811  1.00  0.30           O  
ATOM   2468  OE2 GLU A 312     -68.010 105.232  -8.353  1.00  0.30           O  
ATOM   2469  N   LEU A 313     -62.734 105.903  -7.371  1.00  0.34           N  
ATOM   2470  CA  LEU A 313     -61.928 104.869  -6.743  1.00  0.34           C  
ATOM   2471  C   LEU A 313     -62.141 103.498  -7.379  1.00  0.34           C  
ATOM   2472  O   LEU A 313     -63.206 103.189  -7.900  1.00  0.34           O  
ATOM   2473  CB  LEU A 313     -62.174 104.824  -5.209  1.00  0.34           C  
ATOM   2474  CG  LEU A 313     -63.614 104.486  -4.746  1.00  0.34           C  
ATOM   2475  CD1 LEU A 313     -63.857 102.977  -4.577  1.00  0.34           C  
ATOM   2476  CD2 LEU A 313     -63.924 105.178  -3.410  1.00  0.34           C  
ATOM   2477  N   VAL A 314     -61.119 102.629  -7.377  1.00  0.47           N  
ATOM   2478  CA  VAL A 314     -61.213 101.314  -7.995  1.00  0.47           C  
ATOM   2479  C   VAL A 314     -61.286 100.221  -6.927  1.00  0.47           C  
ATOM   2480  O   VAL A 314     -61.692  99.092  -7.199  1.00  0.47           O  
ATOM   2481  CB  VAL A 314     -60.019 101.129  -8.934  1.00  0.47           C  
ATOM   2482  CG1 VAL A 314     -60.010  99.751  -9.618  1.00  0.47           C  
ATOM   2483  CG2 VAL A 314     -60.062 102.224 -10.018  1.00  0.47           C  
ATOM   2484  N   SER A 315     -60.960 100.547  -5.661  1.00  0.57           N  
ATOM   2485  CA  SER A 315     -61.065  99.619  -4.544  1.00  0.57           C  
ATOM   2486  C   SER A 315     -61.110 100.382  -3.234  1.00  0.57           C  
ATOM   2487  O   SER A 315     -60.804 101.570  -3.161  1.00  0.57           O  
ATOM   2488  CB  SER A 315     -59.899  98.577  -4.462  1.00  0.57           C  
ATOM   2489  OG  SER A 315     -58.607  99.197  -4.435  1.00  0.57           O  
ATOM   2490  N   GLU A 316     -61.517  99.720  -2.139  1.00  0.57           N  
ATOM   2491  CA  GLU A 316     -61.318 100.220  -0.792  1.00  0.57           C  
ATOM   2492  C   GLU A 316     -60.060  99.617  -0.148  1.00  0.57           C  
ATOM   2493  O   GLU A 316     -59.579  98.553  -0.531  1.00  0.57           O  
ATOM   2494  CB  GLU A 316     -62.499  99.827   0.125  1.00  0.57           C  
ATOM   2495  CG  GLU A 316     -63.903 100.354  -0.262  1.00  0.57           C  
ATOM   2496  CD  GLU A 316     -64.962  99.905   0.751  1.00  0.57           C  
ATOM   2497  OE1 GLU A 316     -64.579  99.245   1.756  1.00  0.57           O  
ATOM   2498  OE2 GLU A 316     -66.159 100.226   0.552  1.00  0.57           O  
ATOM   2499  N   ARG A 317     -59.542 100.235   0.952  1.00  0.60           N  
ATOM   2500  CA  ARG A 317     -58.491  99.667   1.815  1.00  0.60           C  
ATOM   2501  C   ARG A 317     -58.883  98.302   2.386  1.00  0.60           C  
ATOM   2502  O   ARG A 317     -58.092  97.398   2.641  1.00  0.60           O  
ATOM   2503  CB  ARG A 317     -58.247 100.542   3.081  1.00  0.60           C  
ATOM   2504  CG  ARG A 317     -57.751 101.983   2.861  1.00  0.60           C  
ATOM   2505  CD  ARG A 317     -57.523 102.687   4.210  1.00  0.60           C  
ATOM   2506  NE  ARG A 317     -57.033 104.076   3.948  1.00  0.60           N  
ATOM   2507  CZ  ARG A 317     -56.391 104.829   4.853  1.00  0.60           C  
ATOM   2508  NH1 ARG A 317     -55.958 106.036   4.514  1.00  0.60           N  
ATOM   2509  NH2 ARG A 317     -56.153 104.422   6.094  1.00  0.60           N  
ATOM   2510  N   THR A 318     -60.186  98.170   2.624  1.00  0.63           N  
ATOM   2511  CA  THR A 318     -60.925  96.982   2.987  1.00  0.63           C  
ATOM   2512  C   THR A 318     -60.776  95.852   1.993  1.00  0.63           C  
ATOM   2513  O   THR A 318     -60.425  94.726   2.342  1.00  0.63           O  
ATOM   2514  CB  THR A 318     -62.356  97.476   3.021  1.00  0.63           C  
ATOM   2515  OG1 THR A 318     -62.573  98.125   4.252  1.00  0.63           O  
ATOM   2516  CG2 THR A 318     -63.486  96.473   2.820  1.00  0.63           C  
ATOM   2517  N   GLU A 319     -60.986  96.122   0.697  1.00  0.67           N  
ATOM   2518  CA  GLU A 319     -60.881  95.144  -0.365  1.00  0.67           C  
ATOM   2519  C   GLU A 319     -59.466  94.708  -0.612  1.00  0.67           C  
ATOM   2520  O   GLU A 319     -59.204  93.524  -0.823  1.00  0.67           O  
ATOM   2521  CB  GLU A 319     -61.571  95.699  -1.607  1.00  0.67           C  
ATOM   2522  CG  GLU A 319     -63.089  95.711  -1.335  1.00  0.67           C  
ATOM   2523  CD  GLU A 319     -63.866  96.655  -2.224  1.00  0.67           C  
ATOM   2524  OE1 GLU A 319     -63.272  97.628  -2.746  1.00  0.67           O  
ATOM   2525  OE2 GLU A 319     -65.089  96.381  -2.337  1.00  0.67           O  
ATOM   2526  N   ALA A 320     -58.519  95.647  -0.453  1.00  0.73           N  
ATOM   2527  CA  ALA A 320     -57.104  95.379  -0.434  1.00  0.73           C  
ATOM   2528  C   ALA A 320     -56.682  94.350   0.599  1.00  0.73           C  
ATOM   2529  O   ALA A 320     -55.910  93.440   0.317  1.00  0.73           O  
ATOM   2530  CB  ALA A 320     -56.370  96.690  -0.153  1.00  0.73           C  
ATOM   2531  N   PHE A 321     -57.245  94.418   1.824  1.00  0.68           N  
ATOM   2532  CA  PHE A 321     -57.054  93.395   2.836  1.00  0.68           C  
ATOM   2533  C   PHE A 321     -57.576  92.022   2.407  1.00  0.68           C  
ATOM   2534  O   PHE A 321     -56.896  91.019   2.594  1.00  0.68           O  
ATOM   2535  CB  PHE A 321     -57.698  93.844   4.176  1.00  0.68           C  
ATOM   2536  CG  PHE A 321     -57.373  92.897   5.307  1.00  0.68           C  
ATOM   2537  CD1 PHE A 321     -56.094  92.887   5.888  1.00  0.68           C  
ATOM   2538  CD2 PHE A 321     -58.339  91.988   5.773  1.00  0.68           C  
ATOM   2539  CE1 PHE A 321     -55.788  91.994   6.925  1.00  0.68           C  
ATOM   2540  CE2 PHE A 321     -58.038  91.094   6.808  1.00  0.68           C  
ATOM   2541  CZ  PHE A 321     -56.763  91.099   7.388  1.00  0.68           C  
ATOM   2542  N   THR A 322     -58.769  91.922   1.778  1.00  0.73           N  
ATOM   2543  CA  THR A 322     -59.244  90.640   1.228  1.00  0.73           C  
ATOM   2544  C   THR A 322     -58.341  90.093   0.155  1.00  0.73           C  
ATOM   2545  O   THR A 322     -57.942  88.934   0.220  1.00  0.73           O  
ATOM   2546  CB  THR A 322     -60.656  90.719   0.646  1.00  0.73           C  
ATOM   2547  OG1 THR A 322     -61.607  90.484   1.664  1.00  0.73           O  
ATOM   2548  CG2 THR A 322     -61.023  89.662  -0.409  1.00  0.73           C  
ATOM   2549  N   ILE A 323     -57.950  90.915  -0.837  1.00  0.73           N  
ATOM   2550  CA  ILE A 323     -57.094  90.466  -1.921  1.00  0.73           C  
ATOM   2551  C   ILE A 323     -55.706  90.098  -1.417  1.00  0.73           C  
ATOM   2552  O   ILE A 323     -55.205  89.019  -1.713  1.00  0.73           O  
ATOM   2553  CB  ILE A 323     -57.069  91.474  -3.064  1.00  0.73           C  
ATOM   2554  CG1 ILE A 323     -58.490  91.641  -3.666  1.00  0.73           C  
ATOM   2555  CG2 ILE A 323     -56.070  91.022  -4.155  1.00  0.73           C  
ATOM   2556  CD1 ILE A 323     -58.636  92.889  -4.546  1.00  0.73           C  
ATOM   2557  N   ALA A 324     -55.083  90.920  -0.549  1.00  0.78           N  
ATOM   2558  CA  ALA A 324     -53.808  90.607   0.067  1.00  0.78           C  
ATOM   2559  C   ALA A 324     -53.831  89.352   0.935  1.00  0.78           C  
ATOM   2560  O   ALA A 324     -52.932  88.522   0.863  1.00  0.78           O  
ATOM   2561  CB  ALA A 324     -53.324  91.806   0.904  1.00  0.78           C  
ATOM   2562  N   ARG A 325     -54.876  89.146   1.762  1.00  0.70           N  
ATOM   2563  CA  ARG A 325     -55.050  87.917   2.517  1.00  0.70           C  
ATOM   2564  C   ARG A 325     -55.306  86.687   1.654  1.00  0.70           C  
ATOM   2565  O   ARG A 325     -54.746  85.624   1.921  1.00  0.70           O  
ATOM   2566  CB  ARG A 325     -56.142  88.058   3.600  1.00  0.70           C  
ATOM   2567  CG  ARG A 325     -55.787  89.050   4.726  1.00  0.70           C  
ATOM   2568  CD  ARG A 325     -54.702  88.582   5.701  1.00  0.70           C  
ATOM   2569  NE  ARG A 325     -55.339  87.612   6.650  1.00  0.70           N  
ATOM   2570  CZ  ARG A 325     -54.682  86.722   7.402  1.00  0.70           C  
ATOM   2571  NH1 ARG A 325     -55.326  86.071   8.368  1.00  0.70           N  
ATOM   2572  NH2 ARG A 325     -53.395  86.459   7.199  1.00  0.70           N  
ATOM   2573  N   ASN A 326     -56.110  86.795   0.571  1.00  0.76           N  
ATOM   2574  CA  ASN A 326     -56.258  85.733  -0.417  1.00  0.76           C  
ATOM   2575  C   ASN A 326     -54.932  85.391  -1.089  1.00  0.76           C  
ATOM   2576  O   ASN A 326     -54.565  84.225  -1.184  1.00  0.76           O  
ATOM   2577  CB  ASN A 326     -57.256  86.123  -1.539  1.00  0.76           C  
ATOM   2578  CG  ASN A 326     -58.698  86.065  -1.061  1.00  0.76           C  
ATOM   2579  OD1 ASN A 326     -59.103  85.240  -0.241  1.00  0.76           O  
ATOM   2580  ND2 ASN A 326     -59.548  86.938  -1.643  1.00  0.76           N  
ATOM   2581  N   LEU A 327     -54.146  86.401  -1.511  1.00  0.72           N  
ATOM   2582  CA  LEU A 327     -52.817  86.218  -2.071  1.00  0.72           C  
ATOM   2583  C   LEU A 327     -51.816  85.610  -1.094  1.00  0.72           C  
ATOM   2584  O   LEU A 327     -51.038  84.728  -1.456  1.00  0.72           O  
ATOM   2585  CB  LEU A 327     -52.259  87.549  -2.627  1.00  0.72           C  
ATOM   2586  CG  LEU A 327     -53.026  88.099  -3.850  1.00  0.72           C  
ATOM   2587  CD1 LEU A 327     -52.529  89.510  -4.194  1.00  0.72           C  
ATOM   2588  CD2 LEU A 327     -52.931  87.176  -5.072  1.00  0.72           C  
ATOM   2589  N   LEU A 328     -51.835  86.026   0.191  1.00  0.68           N  
ATOM   2590  CA  LEU A 328     -51.056  85.385   1.239  1.00  0.68           C  
ATOM   2591  C   LEU A 328     -51.432  83.932   1.451  1.00  0.68           C  
ATOM   2592  O   LEU A 328     -50.555  83.083   1.559  1.00  0.68           O  
ATOM   2593  CB  LEU A 328     -51.176  86.114   2.602  1.00  0.68           C  
ATOM   2594  CG  LEU A 328     -50.381  87.431   2.703  1.00  0.68           C  
ATOM   2595  CD1 LEU A 328     -50.678  88.124   4.042  1.00  0.68           C  
ATOM   2596  CD2 LEU A 328     -48.867  87.212   2.549  1.00  0.68           C  
ATOM   2597  N   THR A 329     -52.737  83.585   1.467  1.00  0.67           N  
ATOM   2598  CA  THR A 329     -53.170  82.188   1.492  1.00  0.67           C  
ATOM   2599  C   THR A 329     -52.703  81.445   0.249  1.00  0.67           C  
ATOM   2600  O   THR A 329     -52.133  80.363   0.361  1.00  0.67           O  
ATOM   2601  CB  THR A 329     -54.681  82.023   1.682  1.00  0.67           C  
ATOM   2602  OG1 THR A 329     -55.046  82.352   3.013  1.00  0.67           O  
ATOM   2603  CG2 THR A 329     -55.164  80.579   1.514  1.00  0.67           C  
ATOM   2604  N   ALA A 330     -52.847  82.052  -0.955  1.00  0.70           N  
ATOM   2605  CA  ALA A 330     -52.502  81.504  -2.262  1.00  0.70           C  
ATOM   2606  C   ALA A 330     -51.060  81.038  -2.420  1.00  0.70           C  
ATOM   2607  O   ALA A 330     -50.783  80.004  -3.023  1.00  0.70           O  
ATOM   2608  CB  ALA A 330     -52.801  82.528  -3.376  1.00  0.70           C  
ATOM   2609  N   ALA A 331     -50.102  81.780  -1.847  1.00  0.65           N  
ATOM   2610  CA  ALA A 331     -48.701  81.435  -1.929  1.00  0.65           C  
ATOM   2611  C   ALA A 331     -48.215  80.608  -0.740  1.00  0.65           C  
ATOM   2612  O   ALA A 331     -47.028  80.295  -0.637  1.00  0.65           O  
ATOM   2613  CB  ALA A 331     -47.915  82.757  -1.969  1.00  0.65           C  
ATOM   2614  N   ALA A 332     -49.117  80.233   0.188  1.00  0.59           N  
ATOM   2615  CA  ALA A 332     -48.760  79.612   1.442  1.00  0.59           C  
ATOM   2616  C   ALA A 332     -49.111  78.139   1.531  1.00  0.59           C  
ATOM   2617  O   ALA A 332     -49.361  77.418   0.564  1.00  0.59           O  
ATOM   2618  CB  ALA A 332     -49.427  80.380   2.602  1.00  0.59           C  
ATOM   2619  N   ASP A 333     -49.104  77.650   2.777  1.00  0.56           N  
ATOM   2620  CA  ASP A 333     -48.981  76.264   3.126  1.00  0.56           C  
ATOM   2621  C   ASP A 333     -50.375  75.654   3.306  1.00  0.56           C  
ATOM   2622  O   ASP A 333     -50.544  74.553   3.819  1.00  0.56           O  
ATOM   2623  CB  ASP A 333     -48.098  76.150   4.402  1.00  0.56           C  
ATOM   2624  CG  ASP A 333     -46.709  76.802   4.309  1.00  0.56           C  
ATOM   2625  OD1 ASP A 333     -46.371  77.506   3.319  1.00  0.56           O  
ATOM   2626  OD2 ASP A 333     -45.948  76.614   5.285  1.00  0.56           O  
ATOM   2627  N   ALA A 334     -51.411  76.367   2.806  1.00  0.63           N  
ATOM   2628  CA  ALA A 334     -52.739  75.839   2.557  1.00  0.63           C  
ATOM   2629  C   ALA A 334     -53.034  75.776   1.053  1.00  0.63           C  
ATOM   2630  O   ALA A 334     -54.101  75.318   0.659  1.00  0.63           O  
ATOM   2631  CB  ALA A 334     -53.824  76.694   3.256  1.00  0.63           C  
ATOM   2632  N   ILE A 335     -52.103  76.221   0.166  1.00  0.59           N  
ATOM   2633  CA  ILE A 335     -52.342  76.287  -1.280  1.00  0.59           C  
ATOM   2634  C   ILE A 335     -51.140  75.740  -2.067  1.00  0.59           C  
ATOM   2635  O   ILE A 335     -50.911  74.534  -2.086  1.00  0.59           O  
ATOM   2636  CB  ILE A 335     -52.728  77.696  -1.737  1.00  0.59           C  
ATOM   2637  CG1 ILE A 335     -53.888  78.283  -0.905  1.00  0.59           C  
ATOM   2638  CG2 ILE A 335     -53.125  77.726  -3.228  1.00  0.59           C  
ATOM   2639  CD1 ILE A 335     -55.271  77.742  -1.218  1.00  0.59           C  
ATOM   2640  N   GLU A 336     -50.330  76.569  -2.774  1.00  0.60           N  
ATOM   2641  CA  GLU A 336     -49.426  76.069  -3.807  1.00  0.60           C  
ATOM   2642  C   GLU A 336     -48.308  75.151  -3.326  1.00  0.60           C  
ATOM   2643  O   GLU A 336     -48.061  74.072  -3.869  1.00  0.60           O  
ATOM   2644  CB  GLU A 336     -48.792  77.228  -4.606  1.00  0.60           C  
ATOM   2645  CG  GLU A 336     -48.033  76.724  -5.859  1.00  0.60           C  
ATOM   2646  CD  GLU A 336     -47.283  77.816  -6.612  1.00  0.60           C  
ATOM   2647  OE1 GLU A 336     -47.225  78.976  -6.137  1.00  0.60           O  
ATOM   2648  OE2 GLU A 336     -46.728  77.465  -7.687  1.00  0.60           O  
ATOM   2649  N   ARG A 337     -47.624  75.539  -2.235  1.00  0.57           N  
ATOM   2650  CA  ARG A 337     -46.498  74.814  -1.676  1.00  0.57           C  
ATOM   2651  C   ARG A 337     -46.866  73.433  -1.185  1.00  0.57           C  
ATOM   2652  O   ARG A 337     -46.182  72.436  -1.400  1.00  0.57           O  
ATOM   2653  CB  ARG A 337     -45.996  75.579  -0.445  1.00  0.57           C  
ATOM   2654  CG  ARG A 337     -45.430  76.972  -0.746  1.00  0.57           C  
ATOM   2655  CD  ARG A 337     -45.273  77.694   0.582  1.00  0.57           C  
ATOM   2656  NE  ARG A 337     -44.622  79.008   0.366  1.00  0.57           N  
ATOM   2657  CZ  ARG A 337     -44.250  79.749   1.415  1.00  0.57           C  
ATOM   2658  NH1 ARG A 337     -43.655  80.919   1.186  1.00  0.57           N  
ATOM   2659  NH2 ARG A 337     -44.463  79.353   2.668  1.00  0.57           N  
ATOM   2660  N   ILE A 338     -48.008  73.356  -0.502  1.00  0.63           N  
ATOM   2661  CA  ILE A 338     -48.529  72.133   0.047  1.00  0.63           C  
ATOM   2662  C   ILE A 338     -49.182  71.271  -1.043  1.00  0.63           C  
ATOM   2663  O   ILE A 338     -49.153  70.047  -0.972  1.00  0.63           O  
ATOM   2664  CB  ILE A 338     -49.394  72.475   1.244  1.00  0.63           C  
ATOM   2665  CG1 ILE A 338     -49.923  71.251   2.033  1.00  0.63           C  
ATOM   2666  CG2 ILE A 338     -50.480  73.465   0.805  1.00  0.63           C  
ATOM   2667  CD1 ILE A 338     -48.954  70.749   3.112  1.00  0.63           C  
ATOM   2668  N   MET A 339     -49.713  71.853  -2.151  1.00  0.68           N  
ATOM   2669  CA  MET A 339     -50.065  71.092  -3.350  1.00  0.68           C  
ATOM   2670  C   MET A 339     -48.856  70.454  -4.016  1.00  0.68           C  
ATOM   2671  O   MET A 339     -48.918  69.326  -4.498  1.00  0.68           O  
ATOM   2672  CB  MET A 339     -50.817  71.937  -4.406  1.00  0.68           C  
ATOM   2673  CG  MET A 339     -52.284  72.187  -4.026  1.00  0.68           C  
ATOM   2674  SD  MET A 339     -53.230  73.149  -5.236  1.00  0.68           S  
ATOM   2675  CE  MET A 339     -53.487  71.869  -6.500  1.00  0.68           C  
ATOM   2676  N   SER A 340     -47.710  71.161  -4.045  1.00  0.77           N  
ATOM   2677  CA  SER A 340     -46.427  70.596  -4.456  1.00  0.77           C  
ATOM   2678  C   SER A 340     -45.966  69.459  -3.544  1.00  0.77           C  
ATOM   2679  O   SER A 340     -45.594  68.384  -4.004  1.00  0.77           O  
ATOM   2680  CB  SER A 340     -45.328  71.687  -4.529  1.00  0.77           C  
ATOM   2681  OG  SER A 340     -44.249  71.262  -5.359  1.00  0.77           O  
ATOM   2682  N   SER A 341     -46.096  69.645  -2.209  1.00  0.79           N  
ATOM   2683  CA  SER A 341     -45.853  68.616  -1.191  1.00  0.79           C  
ATOM   2684  C   SER A 341     -46.732  67.388  -1.366  1.00  0.79           C  
ATOM   2685  O   SER A 341     -46.256  66.258  -1.311  1.00  0.79           O  
ATOM   2686  CB  SER A 341     -46.060  69.185   0.243  1.00  0.79           C  
ATOM   2687  OG  SER A 341     -45.738  68.247   1.271  1.00  0.79           O  
ATOM   2688  N   TYR A 342     -48.040  67.565  -1.674  1.00  0.73           N  
ATOM   2689  CA  TYR A 342     -48.931  66.468  -2.022  1.00  0.73           C  
ATOM   2690  C   TYR A 342     -48.435  65.667  -3.216  1.00  0.73           C  
ATOM   2691  O   TYR A 342     -48.493  64.441  -3.208  1.00  0.73           O  
ATOM   2692  CB  TYR A 342     -50.370  66.970  -2.333  1.00  0.73           C  
ATOM   2693  CG  TYR A 342     -51.280  65.844  -2.781  1.00  0.73           C  
ATOM   2694  CD1 TYR A 342     -51.792  64.928  -1.855  1.00  0.73           C  
ATOM   2695  CD2 TYR A 342     -51.570  65.659  -4.145  1.00  0.73           C  
ATOM   2696  CE1 TYR A 342     -52.653  63.899  -2.270  1.00  0.73           C  
ATOM   2697  CE2 TYR A 342     -52.437  64.638  -4.562  1.00  0.73           C  
ATOM   2698  CZ  TYR A 342     -52.990  63.767  -3.617  1.00  0.73           C  
ATOM   2699  OH  TYR A 342     -53.879  62.746  -4.005  1.00  0.73           O  
ATOM   2700  N   LYS A 343     -47.946  66.330  -4.277  1.00  0.77           N  
ATOM   2701  CA  LYS A 343     -47.403  65.645  -5.433  1.00  0.77           C  
ATOM   2702  C   LYS A 343     -46.183  64.812  -5.085  1.00  0.77           C  
ATOM   2703  O   LYS A 343     -46.134  63.640  -5.438  1.00  0.77           O  
ATOM   2704  CB  LYS A 343     -47.122  66.636  -6.581  1.00  0.77           C  
ATOM   2705  CG  LYS A 343     -48.429  67.234  -7.127  1.00  0.77           C  
ATOM   2706  CD  LYS A 343     -48.195  68.376  -8.123  1.00  0.77           C  
ATOM   2707  CE  LYS A 343     -49.507  69.007  -8.593  1.00  0.77           C  
ATOM   2708  NZ  LYS A 343     -49.218  70.106  -9.537  1.00  0.77           N  
ATOM   2709  N   GLU A 344     -45.245  65.348  -4.277  1.00  0.76           N  
ATOM   2710  CA  GLU A 344     -44.101  64.598  -3.779  1.00  0.76           C  
ATOM   2711  C   GLU A 344     -44.489  63.348  -2.989  1.00  0.76           C  
ATOM   2712  O   GLU A 344     -44.060  62.236  -3.297  1.00  0.76           O  
ATOM   2713  CB  GLU A 344     -43.247  65.522  -2.876  1.00  0.76           C  
ATOM   2714  CG  GLU A 344     -41.977  64.866  -2.277  1.00  0.76           C  
ATOM   2715  CD  GLU A 344     -41.181  65.815  -1.379  1.00  0.76           C  
ATOM   2716  OE1 GLU A 344     -41.582  66.997  -1.227  1.00  0.76           O  
ATOM   2717  OE2 GLU A 344     -40.154  65.338  -0.828  1.00  0.76           O  
ATOM   2718  N   VAL A 345     -45.398  63.459  -1.995  1.00  0.78           N  
ATOM   2719  CA  VAL A 345     -45.874  62.289  -1.265  1.00  0.78           C  
ATOM   2720  C   VAL A 345     -46.726  61.340  -2.104  1.00  0.78           C  
ATOM   2721  O   VAL A 345     -46.691  60.129  -1.906  1.00  0.78           O  
ATOM   2722  CB  VAL A 345     -46.530  62.591   0.077  1.00  0.78           C  
ATOM   2723  CG1 VAL A 345     -45.492  63.239   1.012  1.00  0.78           C  
ATOM   2724  CG2 VAL A 345     -47.735  63.519  -0.081  1.00  0.78           C  
ATOM   2725  N   THR A 346     -47.487  61.844  -3.097  1.00  0.74           N  
ATOM   2726  CA  THR A 346     -48.205  61.029  -4.087  1.00  0.74           C  
ATOM   2727  C   THR A 346     -47.273  60.241  -4.977  1.00  0.74           C  
ATOM   2728  O   THR A 346     -47.494  59.062  -5.229  1.00  0.74           O  
ATOM   2729  CB  THR A 346     -49.152  61.821  -4.978  1.00  0.74           C  
ATOM   2730  OG1 THR A 346     -50.113  62.480  -4.174  1.00  0.74           O  
ATOM   2731  CG2 THR A 346     -49.966  60.916  -5.917  1.00  0.74           C  
ATOM   2732  N   GLU A 347     -46.173  60.846  -5.457  1.00  0.72           N  
ATOM   2733  CA  GLU A 347     -45.127  60.163  -6.198  1.00  0.72           C  
ATOM   2734  C   GLU A 347     -44.393  59.123  -5.359  1.00  0.72           C  
ATOM   2735  O   GLU A 347     -44.150  58.005  -5.815  1.00  0.72           O  
ATOM   2736  CB  GLU A 347     -44.167  61.189  -6.836  1.00  0.72           C  
ATOM   2737  CG  GLU A 347     -44.866  62.001  -7.960  1.00  0.72           C  
ATOM   2738  CD  GLU A 347     -44.017  63.134  -8.533  1.00  0.72           C  
ATOM   2739  OE1 GLU A 347     -42.772  63.098  -8.371  1.00  0.72           O  
ATOM   2740  OE2 GLU A 347     -44.630  64.038  -9.161  1.00  0.72           O  
ATOM   2741  N   LEU A 348     -44.100  59.423  -4.072  1.00  0.72           N  
ATOM   2742  CA  LEU A 348     -43.619  58.433  -3.115  1.00  0.72           C  
ATOM   2743  C   LEU A 348     -44.601  57.278  -2.915  1.00  0.72           C  
ATOM   2744  O   LEU A 348     -44.220  56.113  -2.941  1.00  0.72           O  
ATOM   2745  CB  LEU A 348     -43.317  59.068  -1.730  1.00  0.72           C  
ATOM   2746  CG  LEU A 348     -42.138  60.064  -1.709  1.00  0.72           C  
ATOM   2747  CD1 LEU A 348     -42.100  60.834  -0.380  1.00  0.72           C  
ATOM   2748  CD2 LEU A 348     -40.789  59.371  -1.943  1.00  0.72           C  
ATOM   2749  N   ALA A 349     -45.907  57.557  -2.768  1.00  0.73           N  
ATOM   2750  CA  ALA A 349     -46.949  56.551  -2.702  1.00  0.73           C  
ATOM   2751  C   ALA A 349     -47.143  55.727  -3.960  1.00  0.73           C  
ATOM   2752  O   ALA A 349     -47.325  54.515  -3.922  1.00  0.73           O  
ATOM   2753  CB  ALA A 349     -48.264  57.235  -2.360  1.00  0.73           C  
ATOM   2754  N   GLY A 350     -47.085  56.369  -5.141  1.00  0.73           N  
ATOM   2755  CA  GLY A 350     -47.133  55.695  -6.429  1.00  0.73           C  
ATOM   2756  C   GLY A 350     -45.951  54.798  -6.666  1.00  0.73           C  
ATOM   2757  O   GLY A 350     -46.059  53.792  -7.360  1.00  0.73           O  
ATOM   2758  N   TYR A 351     -44.788  55.127  -6.077  1.00  0.64           N  
ATOM   2759  CA  TYR A 351     -43.660  54.227  -5.964  1.00  0.64           C  
ATOM   2760  C   TYR A 351     -43.925  53.074  -4.986  1.00  0.64           C  
ATOM   2761  O   TYR A 351     -43.805  51.905  -5.348  1.00  0.64           O  
ATOM   2762  CB  TYR A 351     -42.427  55.077  -5.543  1.00  0.64           C  
ATOM   2763  CG  TYR A 351     -41.144  54.301  -5.475  1.00  0.64           C  
ATOM   2764  CD1 TYR A 351     -40.404  54.044  -6.639  1.00  0.64           C  
ATOM   2765  CD2 TYR A 351     -40.649  53.862  -4.235  1.00  0.64           C  
ATOM   2766  CE1 TYR A 351     -39.184  53.356  -6.565  1.00  0.64           C  
ATOM   2767  CE2 TYR A 351     -39.430  53.172  -4.160  1.00  0.64           C  
ATOM   2768  CZ  TYR A 351     -38.700  52.921  -5.327  1.00  0.64           C  
ATOM   2769  OH  TYR A 351     -37.471  52.240  -5.260  1.00  0.64           O  
ATOM   2770  N   THR A 352     -44.351  53.356  -3.737  1.00  0.71           N  
ATOM   2771  CA  THR A 352     -44.554  52.339  -2.702  1.00  0.71           C  
ATOM   2772  C   THR A 352     -45.676  51.362  -2.975  1.00  0.71           C  
ATOM   2773  O   THR A 352     -45.533  50.167  -2.721  1.00  0.71           O  
ATOM   2774  CB  THR A 352     -44.739  52.874  -1.289  1.00  0.71           C  
ATOM   2775  OG1 THR A 352     -45.852  53.742  -1.178  1.00  0.71           O  
ATOM   2776  CG2 THR A 352     -43.480  53.641  -0.867  1.00  0.71           C  
ATOM   2777  N   ALA A 353     -46.815  51.826  -3.522  1.00  0.70           N  
ATOM   2778  CA  ALA A 353     -47.934  50.989  -3.908  1.00  0.70           C  
ATOM   2779  C   ALA A 353     -47.532  49.961  -4.956  1.00  0.70           C  
ATOM   2780  O   ALA A 353     -47.831  48.780  -4.827  1.00  0.70           O  
ATOM   2781  CB  ALA A 353     -49.091  51.867  -4.425  1.00  0.70           C  
ATOM   2782  N   ARG A 354     -46.728  50.359  -5.971  1.00  0.61           N  
ATOM   2783  CA  ARG A 354     -46.162  49.423  -6.935  1.00  0.61           C  
ATOM   2784  C   ARG A 354     -45.316  48.346  -6.276  1.00  0.61           C  
ATOM   2785  O   ARG A 354     -45.404  47.173  -6.628  1.00  0.61           O  
ATOM   2786  CB  ARG A 354     -45.240  50.132  -7.961  1.00  0.61           C  
ATOM   2787  CG  ARG A 354     -45.961  51.055  -8.956  1.00  0.61           C  
ATOM   2788  CD  ARG A 354     -44.957  51.936  -9.709  1.00  0.61           C  
ATOM   2789  NE  ARG A 354     -45.740  52.888 -10.559  1.00  0.61           N  
ATOM   2790  CZ  ARG A 354     -45.179  53.801 -11.363  1.00  0.61           C  
ATOM   2791  NH1 ARG A 354     -45.953  54.668 -12.013  1.00  0.61           N  
ATOM   2792  NH2 ARG A 354     -43.863  53.873 -11.530  1.00  0.61           N  
ATOM   2793  N   VAL A 355     -44.482  48.718  -5.288  1.00  0.71           N  
ATOM   2794  CA  VAL A 355     -43.679  47.768  -4.543  1.00  0.71           C  
ATOM   2795  C   VAL A 355     -44.492  46.802  -3.673  1.00  0.71           C  
ATOM   2796  O   VAL A 355     -44.199  45.613  -3.673  1.00  0.71           O  
ATOM   2797  CB  VAL A 355     -42.540  48.429  -3.777  1.00  0.71           C  
ATOM   2798  CG1 VAL A 355     -41.616  47.341  -3.204  1.00  0.71           C  
ATOM   2799  CG2 VAL A 355     -41.699  49.309  -4.725  1.00  0.71           C  
ATOM   2800  N   HIS A 356     -45.563  47.201  -2.940  1.00  0.68           N  
ATOM   2801  CA  HIS A 356     -46.403  46.188  -2.275  1.00  0.68           C  
ATOM   2802  C   HIS A 356     -47.121  45.285  -3.254  1.00  0.68           C  
ATOM   2803  O   HIS A 356     -47.131  44.059  -3.118  1.00  0.68           O  
ATOM   2804  CB  HIS A 356     -47.501  46.743  -1.346  1.00  0.68           C  
ATOM   2805  CG  HIS A 356     -48.170  45.710  -0.473  1.00  0.68           C  
ATOM   2806  ND1 HIS A 356     -49.212  46.124   0.321  1.00  0.68           N  
ATOM   2807  CD2 HIS A 356     -47.963  44.376  -0.298  1.00  0.68           C  
ATOM   2808  CE1 HIS A 356     -49.627  45.056   0.953  1.00  0.68           C  
ATOM   2809  NE2 HIS A 356     -48.910  43.962   0.615  1.00  0.68           N  
ATOM   2810  N   GLU A 357     -47.694  45.878  -4.314  1.00  0.62           N  
ATOM   2811  CA  GLU A 357     -48.419  45.159  -5.333  1.00  0.62           C  
ATOM   2812  C   GLU A 357     -47.554  44.123  -6.034  1.00  0.62           C  
ATOM   2813  O   GLU A 357     -47.960  42.984  -6.217  1.00  0.62           O  
ATOM   2814  CB  GLU A 357     -49.143  46.144  -6.267  1.00  0.62           C  
ATOM   2815  CG  GLU A 357     -50.255  46.926  -5.510  1.00  0.62           C  
ATOM   2816  CD  GLU A 357     -51.342  45.995  -4.992  1.00  0.62           C  
ATOM   2817  OE1 GLU A 357     -51.877  45.237  -5.836  1.00  0.62           O  
ATOM   2818  OE2 GLU A 357     -51.616  45.982  -3.760  1.00  0.62           O  
ATOM   2819  N   MET A 358     -46.275  44.439  -6.301  1.00  0.61           N  
ATOM   2820  CA  MET A 358     -45.264  43.515  -6.792  1.00  0.61           C  
ATOM   2821  C   MET A 358     -45.055  42.241  -5.958  1.00  0.61           C  
ATOM   2822  O   MET A 358     -44.654  41.191  -6.470  1.00  0.61           O  
ATOM   2823  CB  MET A 358     -43.924  44.286  -6.870  1.00  0.61           C  
ATOM   2824  CG  MET A 358     -42.768  43.534  -7.550  1.00  0.61           C  
ATOM   2825  SD  MET A 358     -43.146  42.976  -9.242  1.00  0.61           S  
ATOM   2826  CE  MET A 358     -43.113  44.620 -10.011  1.00  0.61           C  
ATOM   2827  N   PHE A 359     -45.307  42.300  -4.635  1.00  0.60           N  
ATOM   2828  CA  PHE A 359     -45.222  41.143  -3.760  1.00  0.60           C  
ATOM   2829  C   PHE A 359     -46.558  40.422  -3.613  1.00  0.60           C  
ATOM   2830  O   PHE A 359     -46.627  39.190  -3.543  1.00  0.60           O  
ATOM   2831  CB  PHE A 359     -44.661  41.503  -2.363  1.00  0.60           C  
ATOM   2832  CG  PHE A 359     -43.167  41.695  -2.450  1.00  0.60           C  
ATOM   2833  CD1 PHE A 359     -42.624  42.829  -3.069  1.00  0.60           C  
ATOM   2834  CD2 PHE A 359     -42.286  40.739  -1.919  1.00  0.60           C  
ATOM   2835  CE1 PHE A 359     -41.244  43.036  -3.134  1.00  0.60           C  
ATOM   2836  CE2 PHE A 359     -40.900  40.936  -1.978  1.00  0.60           C  
ATOM   2837  CZ  PHE A 359     -40.379  42.090  -2.576  1.00  0.60           C  
ATOM   2838  N   GLN A 360     -47.687  41.154  -3.577  1.00  0.60           N  
ATOM   2839  CA  GLN A 360     -48.976  40.519  -3.373  1.00  0.60           C  
ATOM   2840  C   GLN A 360     -49.663  40.059  -4.654  1.00  0.60           C  
ATOM   2841  O   GLN A 360     -50.578  39.242  -4.592  1.00  0.60           O  
ATOM   2842  CB  GLN A 360     -49.880  41.357  -2.430  1.00  0.60           C  
ATOM   2843  CG  GLN A 360     -50.356  42.720  -2.967  1.00  0.60           C  
ATOM   2844  CD  GLN A 360     -51.803  42.654  -3.455  1.00  0.60           C  
ATOM   2845  OE1 GLN A 360     -52.726  42.546  -2.643  1.00  0.60           O  
ATOM   2846  NE2 GLN A 360     -52.010  42.713  -4.787  1.00  0.60           N  
ATOM   2847  N   VAL A 361     -49.191  40.485  -5.846  1.00  0.52           N  
ATOM   2848  CA  VAL A 361     -49.776  40.138  -7.137  1.00  0.52           C  
ATOM   2849  C   VAL A 361     -49.847  38.643  -7.481  1.00  0.52           C  
ATOM   2850  O   VAL A 361     -48.918  37.847  -7.301  1.00  0.52           O  
ATOM   2851  CB  VAL A 361     -49.154  40.942  -8.287  1.00  0.52           C  
ATOM   2852  CG1 VAL A 361     -47.769  40.401  -8.700  1.00  0.52           C  
ATOM   2853  CG2 VAL A 361     -50.117  41.054  -9.483  1.00  0.52           C  
ATOM   2854  N   PHE A 362     -51.008  38.231  -8.007  1.00  0.37           N  
ATOM   2855  CA  PHE A 362     -51.335  36.904  -8.483  1.00  0.37           C  
ATOM   2856  C   PHE A 362     -52.026  37.133  -9.821  1.00  0.37           C  
ATOM   2857  O   PHE A 362     -51.633  38.054 -10.521  1.00  0.37           O  
ATOM   2858  CB  PHE A 362     -52.170  36.089  -7.440  1.00  0.37           C  
ATOM   2859  CG  PHE A 362     -53.444  36.779  -6.994  1.00  0.37           C  
ATOM   2860  CD1 PHE A 362     -54.697  36.344  -7.462  1.00  0.37           C  
ATOM   2861  CD2 PHE A 362     -53.406  37.869  -6.106  1.00  0.37           C  
ATOM   2862  CE1 PHE A 362     -55.868  37.032  -7.122  1.00  0.37           C  
ATOM   2863  CE2 PHE A 362     -54.572  38.563  -5.764  1.00  0.37           C  
ATOM   2864  CZ  PHE A 362     -55.804  38.151  -6.285  1.00  0.37           C  
ATOM   2865  N   GLU A 363     -53.058  36.349 -10.195  1.00  0.34           N  
ATOM   2866  CA  GLU A 363     -53.873  36.434 -11.409  1.00  0.34           C  
ATOM   2867  C   GLU A 363     -54.038  37.799 -12.098  1.00  0.34           C  
ATOM   2868  O   GLU A 363     -53.853  37.923 -13.304  1.00  0.34           O  
ATOM   2869  CB  GLU A 363     -55.263  35.819 -11.099  1.00  0.34           C  
ATOM   2870  CG  GLU A 363     -55.971  35.220 -12.339  1.00  0.34           C  
ATOM   2871  CD  GLU A 363     -55.301  33.938 -12.841  1.00  0.34           C  
ATOM   2872  OE1 GLU A 363     -54.354  33.445 -12.171  1.00  0.34           O  
ATOM   2873  OE2 GLU A 363     -55.757  33.433 -13.898  1.00  0.34           O  
ATOM   2874  N   ASP A 364     -54.331  38.868 -11.323  1.00  0.33           N  
ATOM   2875  CA  ASP A 364     -54.311  40.291 -11.638  1.00  0.33           C  
ATOM   2876  C   ASP A 364     -53.234  40.879 -12.575  1.00  0.33           C  
ATOM   2877  O   ASP A 364     -53.383  42.001 -13.068  1.00  0.33           O  
ATOM   2878  CB  ASP A 364     -54.174  41.018 -10.276  1.00  0.33           C  
ATOM   2879  CG  ASP A 364     -55.488  41.095  -9.543  1.00  0.33           C  
ATOM   2880  OD1 ASP A 364     -56.269  40.111  -9.479  1.00  0.33           O  
ATOM   2881  OD2 ASP A 364     -55.788  42.199  -9.018  1.00  0.33           O  
ATOM   2882  N   VAL A 365     -52.113  40.179 -12.843  1.00  0.39           N  
ATOM   2883  CA  VAL A 365     -51.067  40.639 -13.751  1.00  0.39           C  
ATOM   2884  C   VAL A 365     -51.529  40.890 -15.181  1.00  0.39           C  
ATOM   2885  O   VAL A 365     -52.453  40.283 -15.714  1.00  0.39           O  
ATOM   2886  CB  VAL A 365     -49.818  39.765 -13.825  1.00  0.39           C  
ATOM   2887  CG1 VAL A 365     -48.554  40.647 -13.920  1.00  0.39           C  
ATOM   2888  CG2 VAL A 365     -49.713  38.838 -12.617  1.00  0.39           C  
ATOM   2889  N   GLN A 366     -50.878  41.844 -15.859  1.00  0.38           N  
ATOM   2890  CA  GLN A 366     -51.303  42.302 -17.156  1.00  0.38           C  
ATOM   2891  C   GLN A 366     -50.361  41.781 -18.223  1.00  0.38           C  
ATOM   2892  O   GLN A 366     -49.282  42.336 -18.418  1.00  0.38           O  
ATOM   2893  CB  GLN A 366     -51.313  43.849 -17.140  1.00  0.38           C  
ATOM   2894  CG  GLN A 366     -52.219  44.438 -16.029  1.00  0.38           C  
ATOM   2895  CD  GLN A 366     -53.697  44.147 -16.300  1.00  0.38           C  
ATOM   2896  OE1 GLN A 366     -54.286  44.725 -17.219  1.00  0.38           O  
ATOM   2897  NE2 GLN A 366     -54.317  43.257 -15.498  1.00  0.38           N  
ATOM   2898  N   ARG A 367     -50.813  40.718 -18.935  1.00  0.35           N  
ATOM   2899  CA  ARG A 367     -50.094  39.895 -19.908  1.00  0.35           C  
ATOM   2900  C   ARG A 367     -49.481  38.672 -19.246  1.00  0.35           C  
ATOM   2901  O   ARG A 367     -48.507  38.772 -18.514  1.00  0.35           O  
ATOM   2902  CB  ARG A 367     -49.001  40.581 -20.780  1.00  0.35           C  
ATOM   2903  CG  ARG A 367     -49.512  41.750 -21.644  1.00  0.35           C  
ATOM   2904  CD  ARG A 367     -48.369  42.601 -22.207  1.00  0.35           C  
ATOM   2905  NE  ARG A 367     -48.995  43.662 -23.069  1.00  0.35           N  
ATOM   2906  CZ  ARG A 367     -48.323  44.678 -23.627  1.00  0.35           C  
ATOM   2907  NH1 ARG A 367     -48.957  45.526 -24.436  1.00  0.35           N  
ATOM   2908  NH2 ARG A 367     -47.029  44.871 -23.396  1.00  0.35           N  
ATOM   2909  N   CYS A 368     -50.034  37.464 -19.498  1.00  0.39           N  
ATOM   2910  CA  CYS A 368     -49.542  36.241 -18.868  1.00  0.39           C  
ATOM   2911  C   CYS A 368     -48.238  35.727 -19.474  1.00  0.39           C  
ATOM   2912  O   CYS A 368     -47.517  34.928 -18.882  1.00  0.39           O  
ATOM   2913  CB  CYS A 368     -50.605  35.112 -18.921  1.00  0.39           C  
ATOM   2914  SG  CYS A 368     -52.236  35.678 -18.326  1.00  0.39           S  
ATOM   2915  N   HIS A 369     -47.918  36.209 -20.687  1.00  0.36           N  
ATOM   2916  CA  HIS A 369     -46.654  36.029 -21.379  1.00  0.36           C  
ATOM   2917  C   HIS A 369     -45.476  36.698 -20.686  1.00  0.36           C  
ATOM   2918  O   HIS A 369     -45.622  37.712 -20.012  1.00  0.36           O  
ATOM   2919  CB  HIS A 369     -46.727  36.594 -22.813  1.00  0.36           C  
ATOM   2920  CG  HIS A 369     -47.901  36.069 -23.572  1.00  0.36           C  
ATOM   2921  ND1 HIS A 369     -47.915  34.743 -23.942  1.00  0.36           N  
ATOM   2922  CD2 HIS A 369     -49.046  36.683 -23.971  1.00  0.36           C  
ATOM   2923  CE1 HIS A 369     -49.061  34.569 -24.564  1.00  0.36           C  
ATOM   2924  NE2 HIS A 369     -49.788  35.712 -24.609  1.00  0.36           N  
ATOM   2925  N   PHE A 370     -44.256  36.166 -20.873  1.00  0.36           N  
ATOM   2926  CA  PHE A 370     -43.061  36.716 -20.265  1.00  0.36           C  
ATOM   2927  C   PHE A 370     -42.002  36.962 -21.331  1.00  0.36           C  
ATOM   2928  O   PHE A 370     -42.084  36.468 -22.453  1.00  0.36           O  
ATOM   2929  CB  PHE A 370     -42.533  35.818 -19.105  1.00  0.36           C  
ATOM   2930  CG  PHE A 370     -42.169  34.425 -19.555  1.00  0.36           C  
ATOM   2931  CD1 PHE A 370     -40.857  34.130 -19.963  1.00  0.36           C  
ATOM   2932  CD2 PHE A 370     -43.139  33.409 -19.599  1.00  0.36           C  
ATOM   2933  CE1 PHE A 370     -40.524  32.853 -20.432  1.00  0.36           C  
ATOM   2934  CE2 PHE A 370     -42.811  32.130 -20.067  1.00  0.36           C  
ATOM   2935  CZ  PHE A 370     -41.503  31.853 -20.485  1.00  0.36           C  
ATOM   2936  N   LYS A 371     -40.975  37.773 -21.009  1.00  0.48           N  
ATOM   2937  CA  LYS A 371     -39.878  38.042 -21.919  1.00  0.48           C  
ATOM   2938  C   LYS A 371     -38.731  37.068 -21.688  1.00  0.48           C  
ATOM   2939  O   LYS A 371     -38.417  36.708 -20.557  1.00  0.48           O  
ATOM   2940  CB  LYS A 371     -39.340  39.489 -21.768  1.00  0.48           C  
ATOM   2941  CG  LYS A 371     -40.354  40.580 -22.158  1.00  0.48           C  
ATOM   2942  CD  LYS A 371     -39.722  41.984 -22.117  1.00  0.48           C  
ATOM   2943  CE  LYS A 371     -40.682  43.104 -22.534  1.00  0.48           C  
ATOM   2944  NZ  LYS A 371     -39.989  44.414 -22.496  1.00  0.48           N  
ATOM   2945  N   ARG A 372     -38.073  36.608 -22.778  1.00  0.43           N  
ATOM   2946  CA  ARG A 372     -36.879  35.777 -22.687  1.00  0.43           C  
ATOM   2947  C   ARG A 372     -35.664  36.462 -22.038  1.00  0.43           C  
ATOM   2948  O   ARG A 372     -35.025  35.804 -21.212  1.00  0.43           O  
ATOM   2949  CB  ARG A 372     -36.493  35.164 -24.065  1.00  0.43           C  
ATOM   2950  CG  ARG A 372     -35.341  34.129 -24.002  1.00  0.43           C  
ATOM   2951  CD  ARG A 372     -34.527  33.955 -25.297  1.00  0.43           C  
ATOM   2952  NE  ARG A 372     -33.872  35.268 -25.660  1.00  0.43           N  
ATOM   2953  CZ  ARG A 372     -32.819  35.819 -25.034  1.00  0.43           C  
ATOM   2954  NH1 ARG A 372     -32.330  36.979 -25.473  1.00  0.43           N  
ATOM   2955  NH2 ARG A 372     -32.237  35.255 -23.984  1.00  0.43           N  
ATOM   2956  N   PRO A 373     -35.263  37.719 -22.297  1.00  0.50           N  
ATOM   2957  CA  PRO A 373     -34.421  38.475 -21.371  1.00  0.50           C  
ATOM   2958  C   PRO A 373     -35.034  38.579 -19.987  1.00  0.50           C  
ATOM   2959  O   PRO A 373     -36.147  39.087 -19.845  1.00  0.50           O  
ATOM   2960  CB  PRO A 373     -34.248  39.853 -22.031  1.00  0.50           C  
ATOM   2961  CG  PRO A 373     -34.499  39.584 -23.517  1.00  0.50           C  
ATOM   2962  CD  PRO A 373     -35.587  38.511 -23.484  1.00  0.50           C  
ATOM   2963  N   ARG A 374     -34.322  38.117 -18.952  1.00  0.47           N  
ATOM   2964  CA  ARG A 374     -34.877  37.970 -17.621  1.00  0.47           C  
ATOM   2965  C   ARG A 374     -33.938  38.600 -16.625  1.00  0.47           C  
ATOM   2966  O   ARG A 374     -33.726  38.119 -15.521  1.00  0.47           O  
ATOM   2967  CB  ARG A 374     -35.195  36.493 -17.274  1.00  0.47           C  
ATOM   2968  CG  ARG A 374     -34.012  35.501 -17.352  1.00  0.47           C  
ATOM   2969  CD  ARG A 374     -34.410  34.129 -16.799  1.00  0.47           C  
ATOM   2970  NE  ARG A 374     -33.217  33.224 -16.790  1.00  0.47           N  
ATOM   2971  CZ  ARG A 374     -33.249  31.974 -16.305  1.00  0.47           C  
ATOM   2972  NH1 ARG A 374     -32.112  31.299 -16.145  1.00  0.47           N  
ATOM   2973  NH2 ARG A 374     -34.391  31.379 -15.968  1.00  0.47           N  
ATOM   2974  N   GLU A 375     -33.349  39.727 -17.040  1.00  0.51           N  
ATOM   2975  CA  GLU A 375     -32.290  40.417 -16.340  1.00  0.51           C  
ATOM   2976  C   GLU A 375     -32.840  41.572 -15.501  1.00  0.51           C  
ATOM   2977  O   GLU A 375     -32.105  42.323 -14.866  1.00  0.51           O  
ATOM   2978  CB  GLU A 375     -31.326  40.926 -17.440  1.00  0.51           C  
ATOM   2979  CG  GLU A 375     -30.732  39.778 -18.306  1.00  0.51           C  
ATOM   2980  CD  GLU A 375     -30.673  40.097 -19.805  1.00  0.51           C  
ATOM   2981  OE1 GLU A 375     -30.225  41.217 -20.158  1.00  0.51           O  
ATOM   2982  OE2 GLU A 375     -31.107  39.216 -20.598  1.00  0.51           O  
ATOM   2983  N   LEU A 376     -34.182  41.728 -15.488  1.00  0.46           N  
ATOM   2984  CA  LEU A 376     -34.906  42.702 -14.685  1.00  0.46           C  
ATOM   2985  C   LEU A 376     -35.278  42.168 -13.306  1.00  0.46           C  
ATOM   2986  O   LEU A 376     -35.033  42.806 -12.285  1.00  0.46           O  
ATOM   2987  CB  LEU A 376     -36.195  43.100 -15.448  1.00  0.46           C  
ATOM   2988  CG  LEU A 376     -37.110  44.122 -14.738  1.00  0.46           C  
ATOM   2989  CD1 LEU A 376     -36.404  45.466 -14.505  1.00  0.46           C  
ATOM   2990  CD2 LEU A 376     -38.399  44.332 -15.545  1.00  0.46           C  
ATOM   2991  N   GLU A 377     -35.867  40.955 -13.257  1.00  0.54           N  
ATOM   2992  CA  GLU A 377     -36.045  40.184 -12.039  1.00  0.54           C  
ATOM   2993  C   GLU A 377     -34.749  39.451 -11.754  1.00  0.54           C  
ATOM   2994  O   GLU A 377     -33.858  39.363 -12.593  1.00  0.54           O  
ATOM   2995  CB  GLU A 377     -37.196  39.148 -12.169  1.00  0.54           C  
ATOM   2996  CG  GLU A 377     -38.610  39.758 -12.002  1.00  0.54           C  
ATOM   2997  CD  GLU A 377     -39.100  39.789 -10.559  1.00  0.54           C  
ATOM   2998  OE1 GLU A 377     -39.129  38.718  -9.895  1.00  0.54           O  
ATOM   2999  OE2 GLU A 377     -39.556  40.861 -10.085  1.00  0.54           O  
ATOM   3000  N   ASP A 378     -34.619  38.879 -10.552  1.00  0.56           N  
ATOM   3001  CA  ASP A 378     -33.452  38.147 -10.115  1.00  0.56           C  
ATOM   3002  C   ASP A 378     -33.624  36.645 -10.342  1.00  0.56           C  
ATOM   3003  O   ASP A 378     -32.830  35.818  -9.897  1.00  0.56           O  
ATOM   3004  CB  ASP A 378     -33.133  38.502  -8.632  1.00  0.56           C  
ATOM   3005  CG  ASP A 378     -34.326  38.514  -7.689  1.00  0.56           C  
ATOM   3006  OD1 ASP A 378     -35.474  38.180  -8.082  1.00  0.56           O  
ATOM   3007  OD2 ASP A 378     -34.132  38.912  -6.512  1.00  0.56           O  
ATOM   3008  N   ALA A 379     -34.664  36.263 -11.103  1.00  0.61           N  
ATOM   3009  CA  ALA A 379     -34.944  34.894 -11.452  1.00  0.61           C  
ATOM   3010  C   ALA A 379     -35.621  34.842 -12.818  1.00  0.61           C  
ATOM   3011  O   ALA A 379     -35.308  35.600 -13.732  1.00  0.61           O  
ATOM   3012  CB  ALA A 379     -35.813  34.241 -10.354  1.00  0.61           C  
ATOM   3013  N   GLN A 380     -36.568  33.909 -13.041  1.00  0.55           N  
ATOM   3014  CA  GLN A 380     -37.381  33.912 -14.248  1.00  0.55           C  
ATOM   3015  C   GLN A 380     -38.409  35.041 -14.269  1.00  0.55           C  
ATOM   3016  O   GLN A 380     -39.014  35.358 -13.252  1.00  0.55           O  
ATOM   3017  CB  GLN A 380     -38.037  32.532 -14.494  1.00  0.55           C  
ATOM   3018  CG  GLN A 380     -38.524  32.316 -15.949  1.00  0.55           C  
ATOM   3019  CD  GLN A 380     -38.852  30.842 -16.198  1.00  0.55           C  
ATOM   3020  OE1 GLN A 380     -37.986  29.992 -16.000  1.00  0.55           O  
ATOM   3021  NE2 GLN A 380     -40.081  30.534 -16.670  1.00  0.55           N  
ATOM   3022  N   ALA A 381     -38.628  35.671 -15.448  1.00  0.59           N  
ATOM   3023  CA  ALA A 381     -39.500  36.823 -15.619  1.00  0.59           C  
ATOM   3024  C   ALA A 381     -40.965  36.568 -15.261  1.00  0.59           C  
ATOM   3025  O   ALA A 381     -41.656  37.432 -14.730  1.00  0.59           O  
ATOM   3026  CB  ALA A 381     -39.372  37.337 -17.068  1.00  0.59           C  
ATOM   3027  N   GLY A 382     -41.460  35.345 -15.534  1.00  0.60           N  
ATOM   3028  CA  GLY A 382     -42.666  34.822 -14.910  1.00  0.60           C  
ATOM   3029  C   GLY A 382     -42.305  33.536 -14.223  1.00  0.60           C  
ATOM   3030  O   GLY A 382     -41.460  32.781 -14.703  1.00  0.60           O  
ATOM   3031  N   SER A 383     -42.959  33.218 -13.098  1.00  0.62           N  
ATOM   3032  CA  SER A 383     -42.664  32.106 -12.205  1.00  0.62           C  
ATOM   3033  C   SER A 383     -43.212  30.765 -12.674  1.00  0.62           C  
ATOM   3034  O   SER A 383     -43.715  29.957 -11.902  1.00  0.62           O  
ATOM   3035  CB  SER A 383     -43.247  32.405 -10.799  1.00  0.62           C  
ATOM   3036  OG  SER A 383     -44.626  32.780 -10.841  1.00  0.62           O  
ATOM   3037  N   GLY A 384     -43.158  30.496 -13.995  1.00  0.64           N  
ATOM   3038  CA  GLY A 384     -43.834  29.356 -14.625  1.00  0.64           C  
ATOM   3039  C   GLY A 384     -45.301  29.626 -14.856  1.00  0.64           C  
ATOM   3040  O   GLY A 384     -46.045  28.814 -15.393  1.00  0.64           O  
ATOM   3041  N   THR A 385     -45.719  30.826 -14.455  1.00  0.57           N  
ATOM   3042  CA  THR A 385     -47.030  31.417 -14.554  1.00  0.57           C  
ATOM   3043  C   THR A 385     -46.711  32.885 -14.416  1.00  0.57           C  
ATOM   3044  O   THR A 385     -45.542  33.254 -14.321  1.00  0.57           O  
ATOM   3045  CB  THR A 385     -48.043  30.945 -13.512  1.00  0.57           C  
ATOM   3046  OG1 THR A 385     -49.336  31.473 -13.787  1.00  0.57           O  
ATOM   3047  CG2 THR A 385     -47.649  31.354 -12.082  1.00  0.57           C  
ATOM   3048  N   ILE A 386     -47.694  33.786 -14.450  1.00  0.47           N  
ATOM   3049  CA  ILE A 386     -47.426  35.201 -14.303  1.00  0.47           C  
ATOM   3050  C   ILE A 386     -47.603  35.693 -12.863  1.00  0.47           C  
ATOM   3051  O   ILE A 386     -48.484  35.266 -12.118  1.00  0.47           O  
ATOM   3052  CB  ILE A 386     -48.234  35.987 -15.320  1.00  0.47           C  
ATOM   3053  CG1 ILE A 386     -47.702  37.421 -15.523  1.00  0.47           C  
ATOM   3054  CG2 ILE A 386     -49.741  35.960 -14.977  1.00  0.47           C  
ATOM   3055  CD1 ILE A 386     -46.341  37.498 -16.224  1.00  0.47           C  
ATOM   3056  N   GLY A 387     -46.735  36.629 -12.411  1.00  0.56           N  
ATOM   3057  CA  GLY A 387     -46.884  37.300 -11.123  1.00  0.56           C  
ATOM   3058  C   GLY A 387     -45.935  36.835 -10.065  1.00  0.56           C  
ATOM   3059  O   GLY A 387     -44.906  36.225 -10.328  1.00  0.56           O  
ATOM   3060  N   ARG A 388     -46.265  37.134  -8.794  1.00  0.56           N  
ATOM   3061  CA  ARG A 388     -45.418  36.781  -7.672  1.00  0.56           C  
ATOM   3062  C   ARG A 388     -45.908  35.504  -7.020  1.00  0.56           C  
ATOM   3063  O   ARG A 388     -45.439  35.078  -5.972  1.00  0.56           O  
ATOM   3064  CB  ARG A 388     -45.387  37.928  -6.630  1.00  0.56           C  
ATOM   3065  CG  ARG A 388     -44.301  37.798  -5.532  1.00  0.56           C  
ATOM   3066  CD  ARG A 388     -42.858  37.732  -6.037  1.00  0.56           C  
ATOM   3067  NE  ARG A 388     -42.632  38.987  -6.821  1.00  0.56           N  
ATOM   3068  CZ  ARG A 388     -41.577  39.191  -7.618  1.00  0.56           C  
ATOM   3069  NH1 ARG A 388     -41.365  40.395  -8.138  1.00  0.56           N  
ATOM   3070  NH2 ARG A 388     -40.749  38.206  -7.944  1.00  0.56           N  
ATOM   3071  N   SER A 389     -46.882  34.815  -7.643  1.00  0.58           N  
ATOM   3072  CA  SER A 389     -47.362  33.540  -7.137  1.00  0.58           C  
ATOM   3073  C   SER A 389     -46.245  32.509  -7.077  1.00  0.58           C  
ATOM   3074  O   SER A 389     -45.349  32.500  -7.923  1.00  0.58           O  
ATOM   3075  CB  SER A 389     -48.554  32.985  -7.948  1.00  0.58           C  
ATOM   3076  OG  SER A 389     -49.266  32.016  -7.179  1.00  0.58           O  
ATOM   3077  N   GLY A 390     -46.222  31.684  -6.010  1.00  0.62           N  
ATOM   3078  CA  GLY A 390     -45.138  30.749  -5.725  1.00  0.62           C  
ATOM   3079  C   GLY A 390     -44.801  29.782  -6.833  1.00  0.62           C  
ATOM   3080  O   GLY A 390     -45.677  29.192  -7.453  1.00  0.62           O  
ATOM   3081  N   VAL A 391     -43.492  29.546  -7.050  1.00  0.59           N  
ATOM   3082  CA  VAL A 391     -42.989  28.642  -8.080  1.00  0.59           C  
ATOM   3083  C   VAL A 391     -42.801  27.232  -7.501  1.00  0.59           C  
ATOM   3084  O   VAL A 391     -42.274  26.301  -8.108  1.00  0.59           O  
ATOM   3085  CB  VAL A 391     -41.754  29.262  -8.749  1.00  0.59           C  
ATOM   3086  CG1 VAL A 391     -40.529  29.367  -7.830  1.00  0.59           C  
ATOM   3087  CG2 VAL A 391     -41.395  28.528 -10.052  1.00  0.59           C  
ATOM   3088  N   ARG A 392     -43.347  27.035  -6.287  1.00  0.52           N  
ATOM   3089  CA  ARG A 392     -43.485  25.774  -5.605  1.00  0.52           C  
ATOM   3090  C   ARG A 392     -44.760  25.882  -4.799  1.00  0.52           C  
ATOM   3091  O   ARG A 392     -45.097  26.952  -4.293  1.00  0.52           O  
ATOM   3092  CB  ARG A 392     -42.295  25.542  -4.645  1.00  0.52           C  
ATOM   3093  CG  ARG A 392     -42.359  24.320  -3.714  1.00  0.52           C  
ATOM   3094  CD  ARG A 392     -41.237  24.299  -2.664  1.00  0.52           C  
ATOM   3095  NE  ARG A 392     -41.478  25.409  -1.663  1.00  0.52           N  
ATOM   3096  CZ  ARG A 392     -42.408  25.374  -0.691  1.00  0.52           C  
ATOM   3097  NH1 ARG A 392     -42.753  26.486  -0.038  1.00  0.52           N  
ATOM   3098  NH2 ARG A 392     -43.029  24.248  -0.371  1.00  0.52           N  
ATOM   3099  N   VAL A 393     -45.517  24.776  -4.681  1.00  0.47           N  
ATOM   3100  CA  VAL A 393     -46.724  24.695  -3.879  1.00  0.47           C  
ATOM   3101  C   VAL A 393     -46.523  24.936  -2.387  1.00  0.47           C  
ATOM   3102  O   VAL A 393     -45.523  24.539  -1.791  1.00  0.47           O  
ATOM   3103  CB  VAL A 393     -47.456  23.370  -4.083  1.00  0.47           C  
ATOM   3104  CG1 VAL A 393     -47.914  23.275  -5.550  1.00  0.47           C  
ATOM   3105  CG2 VAL A 393     -46.573  22.164  -3.698  1.00  0.47           C  
ATOM   3106  N   GLU A 394     -47.510  25.595  -1.751  1.00  0.48           N  
ATOM   3107  CA  GLU A 394     -47.591  25.717  -0.308  1.00  0.48           C  
ATOM   3108  C   GLU A 394     -48.414  24.547   0.239  1.00  0.48           C  
ATOM   3109  O   GLU A 394     -47.923  23.428   0.360  1.00  0.48           O  
ATOM   3110  CB  GLU A 394     -48.142  27.129   0.050  1.00  0.48           C  
ATOM   3111  CG  GLU A 394     -48.301  27.461   1.559  1.00  0.48           C  
ATOM   3112  CD  GLU A 394     -47.053  27.235   2.417  1.00  0.48           C  
ATOM   3113  OE1 GLU A 394     -45.929  27.076   1.867  1.00  0.48           O  
ATOM   3114  OE2 GLU A 394     -47.248  27.203   3.660  1.00  0.48           O  
ATOM   3115  N   GLY A 395     -49.719  24.743   0.521  1.00  0.39           N  
ATOM   3116  CA  GLY A 395     -50.601  23.669   0.985  1.00  0.39           C  
ATOM   3117  C   GLY A 395     -51.210  22.659   0.014  1.00  0.39           C  
ATOM   3118  O   GLY A 395     -51.730  21.681   0.549  1.00  0.39           O  
ATOM   3119  N   PRO A 396     -51.252  22.712  -1.325  1.00  0.28           N  
ATOM   3120  CA  PRO A 396     -52.072  21.746  -2.059  1.00  0.28           C  
ATOM   3121  C   PRO A 396     -51.266  20.544  -2.545  1.00  0.28           C  
ATOM   3122  O   PRO A 396     -50.541  20.642  -3.535  1.00  0.28           O  
ATOM   3123  CB  PRO A 396     -52.615  22.573  -3.244  1.00  0.28           C  
ATOM   3124  CG  PRO A 396     -51.531  23.619  -3.512  1.00  0.28           C  
ATOM   3125  CD  PRO A 396     -51.021  23.929  -2.108  1.00  0.28           C  
ATOM   3126  N   LEU A 397     -51.442  19.368  -1.908  1.00  0.31           N  
ATOM   3127  CA  LEU A 397     -50.931  18.105  -2.411  1.00  0.31           C  
ATOM   3128  C   LEU A 397     -51.712  16.959  -1.762  1.00  0.31           C  
ATOM   3129  O   LEU A 397     -52.355  17.127  -0.728  1.00  0.31           O  
ATOM   3130  CB  LEU A 397     -49.397  17.965  -2.177  1.00  0.31           C  
ATOM   3131  CG  LEU A 397     -48.698  16.713  -2.763  1.00  0.31           C  
ATOM   3132  CD1 LEU A 397     -48.937  16.544  -4.273  1.00  0.31           C  
ATOM   3133  CD2 LEU A 397     -47.188  16.779  -2.490  1.00  0.31           C  
ATOM   3134  N   LYS A 398     -51.723  15.755  -2.379  1.00  0.44           N  
ATOM   3135  CA  LYS A 398     -52.334  14.562  -1.813  1.00  0.44           C  
ATOM   3136  C   LYS A 398     -51.643  14.033  -0.558  1.00  0.44           C  
ATOM   3137  O   LYS A 398     -50.429  13.844  -0.515  1.00  0.44           O  
ATOM   3138  CB  LYS A 398     -52.387  13.397  -2.838  1.00  0.44           C  
ATOM   3139  CG  LYS A 398     -53.271  13.689  -4.060  1.00  0.44           C  
ATOM   3140  CD  LYS A 398     -53.393  12.481  -5.008  1.00  0.44           C  
ATOM   3141  CE  LYS A 398     -54.342  12.753  -6.184  1.00  0.44           C  
ATOM   3142  NZ  LYS A 398     -54.453  11.567  -7.066  1.00  0.44           N  
ATOM   3143  N   ILE A 399     -52.424  13.698   0.487  1.00  0.40           N  
ATOM   3144  CA  ILE A 399     -51.896  13.091   1.695  1.00  0.40           C  
ATOM   3145  C   ILE A 399     -52.010  11.580   1.587  1.00  0.40           C  
ATOM   3146  O   ILE A 399     -53.079  11.001   1.753  1.00  0.40           O  
ATOM   3147  CB  ILE A 399     -52.617  13.575   2.956  1.00  0.40           C  
ATOM   3148  CG1 ILE A 399     -52.495  15.114   3.090  1.00  0.40           C  
ATOM   3149  CG2 ILE A 399     -52.054  12.857   4.212  1.00  0.40           C  
ATOM   3150  CD1 ILE A 399     -53.431  15.708   4.150  1.00  0.40           C  
ATOM   3151  N   ARG A 400     -50.886  10.881   1.326  1.00  0.39           N  
ATOM   3152  CA  ARG A 400     -50.872   9.427   1.381  1.00  0.39           C  
ATOM   3153  C   ARG A 400     -50.329   8.923   2.704  1.00  0.39           C  
ATOM   3154  O   ARG A 400     -50.509   7.765   3.061  1.00  0.39           O  
ATOM   3155  CB  ARG A 400     -49.964   8.830   0.276  1.00  0.39           C  
ATOM   3156  CG  ARG A 400     -50.541   8.954  -1.147  1.00  0.39           C  
ATOM   3157  CD  ARG A 400     -49.643   8.269  -2.184  1.00  0.39           C  
ATOM   3158  NE  ARG A 400     -50.372   8.272  -3.496  1.00  0.39           N  
ATOM   3159  CZ  ARG A 400     -49.805   7.946  -4.666  1.00  0.39           C  
ATOM   3160  NH1 ARG A 400     -50.562   7.820  -5.755  1.00  0.39           N  
ATOM   3161  NH2 ARG A 400     -48.500   7.723  -4.776  1.00  0.39           N  
ATOM   3162  N   GLY A 401     -49.647   9.773   3.494  1.00  0.49           N  
ATOM   3163  CA  GLY A 401     -48.882   9.248   4.621  1.00  0.49           C  
ATOM   3164  C   GLY A 401     -49.657   8.952   5.877  1.00  0.49           C  
ATOM   3165  O   GLY A 401     -49.369   8.003   6.592  1.00  0.49           O  
ATOM   3166  N   GLN A 402     -50.707   9.728   6.188  1.00  0.36           N  
ATOM   3167  CA  GLN A 402     -51.501   9.500   7.390  1.00  0.36           C  
ATOM   3168  C   GLN A 402     -52.732   8.656   7.085  1.00  0.36           C  
ATOM   3169  O   GLN A 402     -53.712   8.649   7.821  1.00  0.36           O  
ATOM   3170  CB  GLN A 402     -51.875  10.834   8.079  1.00  0.36           C  
ATOM   3171  CG  GLN A 402     -50.652  11.612   8.631  1.00  0.36           C  
ATOM   3172  CD  GLN A 402     -49.951  10.854   9.766  1.00  0.36           C  
ATOM   3173  OE1 GLN A 402     -50.541  10.608  10.815  1.00  0.36           O  
ATOM   3174  NE2 GLN A 402     -48.664  10.481   9.577  1.00  0.36           N  
ATOM   3175  N   VAL A 403     -52.674   7.885   5.979  1.00  0.30           N  
ATOM   3176  CA  VAL A 403     -53.609   6.825   5.622  1.00  0.30           C  
ATOM   3177  C   VAL A 403     -53.563   5.673   6.616  1.00  0.30           C  
ATOM   3178  O   VAL A 403     -54.585   5.048   6.875  1.00  0.30           O  
ATOM   3179  CB  VAL A 403     -53.314   6.328   4.205  1.00  0.30           C  
ATOM   3180  CG1 VAL A 403     -54.081   5.040   3.836  1.00  0.30           C  
ATOM   3181  CG2 VAL A 403     -53.693   7.446   3.215  1.00  0.30           C  
ATOM   3182  N   VAL A 404     -52.357   5.411   7.179  1.00  0.22           N  
ATOM   3183  CA  VAL A 404     -51.975   4.327   8.084  1.00  0.22           C  
ATOM   3184  C   VAL A 404     -51.204   3.271   7.309  1.00  0.22           C  
ATOM   3185  O   VAL A 404     -49.999   3.128   7.502  1.00  0.22           O  
ATOM   3186  CB  VAL A 404     -53.057   3.749   9.012  1.00  0.22           C  
ATOM   3187  CG1 VAL A 404     -52.508   2.593   9.874  1.00  0.22           C  
ATOM   3188  CG2 VAL A 404     -53.580   4.868   9.941  1.00  0.22           C  
ATOM   3189  N   ASP A 405     -51.840   2.529   6.382  1.00  0.24           N  
ATOM   3190  CA  ASP A 405     -51.217   1.419   5.674  1.00  0.24           C  
ATOM   3191  C   ASP A 405     -50.011   1.748   4.784  1.00  0.24           C  
ATOM   3192  O   ASP A 405     -48.992   1.057   4.786  1.00  0.24           O  
ATOM   3193  CB  ASP A 405     -52.289   0.755   4.778  1.00  0.24           C  
ATOM   3194  CG  ASP A 405     -53.483   0.397   5.637  1.00  0.24           C  
ATOM   3195  OD1 ASP A 405     -53.398  -0.608   6.381  1.00  0.24           O  
ATOM   3196  OD2 ASP A 405     -54.467   1.176   5.580  1.00  0.24           O  
ATOM   3197  N   VAL A 406     -50.094   2.823   3.973  1.00  0.30           N  
ATOM   3198  CA  VAL A 406     -49.205   3.003   2.826  1.00  0.30           C  
ATOM   3199  C   VAL A 406     -48.007   3.914   3.081  1.00  0.30           C  
ATOM   3200  O   VAL A 406     -47.361   4.377   2.142  1.00  0.30           O  
ATOM   3201  CB  VAL A 406     -49.950   3.452   1.565  1.00  0.30           C  
ATOM   3202  CG1 VAL A 406     -51.033   2.414   1.207  1.00  0.30           C  
ATOM   3203  CG2 VAL A 406     -50.574   4.849   1.736  1.00  0.30           C  
ATOM   3204  N   GLU A 407     -47.655   4.172   4.356  1.00  0.41           N  
ATOM   3205  CA  GLU A 407     -46.478   4.944   4.725  1.00  0.41           C  
ATOM   3206  C   GLU A 407     -45.551   4.041   5.517  1.00  0.41           C  
ATOM   3207  O   GLU A 407     -45.997   3.257   6.349  1.00  0.41           O  
ATOM   3208  CB  GLU A 407     -46.861   6.179   5.570  1.00  0.41           C  
ATOM   3209  CG  GLU A 407     -46.011   7.459   5.333  1.00  0.41           C  
ATOM   3210  CD  GLU A 407     -44.536   7.369   5.707  1.00  0.41           C  
ATOM   3211  OE1 GLU A 407     -44.142   7.937   6.755  1.00  0.41           O  
ATOM   3212  OE2 GLU A 407     -43.776   6.755   4.909  1.00  0.41           O  
ATOM   3213  N   GLN A 408     -44.239   4.098   5.240  1.00  0.44           N  
ATOM   3214  CA  GLN A 408     -43.254   3.149   5.733  1.00  0.44           C  
ATOM   3215  C   GLN A 408     -41.860   3.786   5.760  1.00  0.44           C  
ATOM   3216  O   GLN A 408     -40.851   3.114   5.977  1.00  0.44           O  
ATOM   3217  CB  GLN A 408     -43.152   1.889   4.813  1.00  0.44           C  
ATOM   3218  CG  GLN A 408     -44.425   1.014   4.650  1.00  0.44           C  
ATOM   3219  CD  GLN A 408     -44.843   0.310   5.946  1.00  0.44           C  
ATOM   3220  OE1 GLN A 408     -44.017  -0.259   6.660  1.00  0.44           O  
ATOM   3221  NE2 GLN A 408     -46.163   0.294   6.241  1.00  0.44           N  
ATOM   3222  N   GLY A 409     -41.747   5.111   5.523  1.00  0.61           N  
ATOM   3223  CA  GLY A 409     -40.502   5.869   5.558  1.00  0.61           C  
ATOM   3224  C   GLY A 409     -39.594   5.740   4.358  1.00  0.61           C  
ATOM   3225  O   GLY A 409     -38.494   6.273   4.357  1.00  0.61           O  
ATOM   3226  N   ILE A 410     -39.989   5.013   3.299  1.00  0.58           N  
ATOM   3227  CA  ILE A 410     -39.075   4.644   2.221  1.00  0.58           C  
ATOM   3228  C   ILE A 410     -38.825   5.773   1.224  1.00  0.58           C  
ATOM   3229  O   ILE A 410     -39.730   6.219   0.519  1.00  0.58           O  
ATOM   3230  CB  ILE A 410     -39.555   3.407   1.457  1.00  0.58           C  
ATOM   3231  CG1 ILE A 410     -39.866   2.239   2.425  1.00  0.58           C  
ATOM   3232  CG2 ILE A 410     -38.484   2.993   0.416  1.00  0.58           C  
ATOM   3233  CD1 ILE A 410     -40.569   1.054   1.753  1.00  0.58           C  
ATOM   3234  N   ILE A 411     -37.558   6.227   1.100  1.00  0.66           N  
ATOM   3235  CA  ILE A 411     -37.171   7.324   0.222  1.00  0.66           C  
ATOM   3236  C   ILE A 411     -36.282   6.781  -0.873  1.00  0.66           C  
ATOM   3237  O   ILE A 411     -35.456   5.896  -0.680  1.00  0.66           O  
ATOM   3238  CB  ILE A 411     -36.503   8.479   0.969  1.00  0.66           C  
ATOM   3239  CG1 ILE A 411     -37.425   8.985   2.102  1.00  0.66           C  
ATOM   3240  CG2 ILE A 411     -36.118   9.641   0.019  1.00  0.66           C  
ATOM   3241  CD1 ILE A 411     -38.816   9.411   1.617  1.00  0.66           C  
ATOM   3242  N   CYS A 412     -36.476   7.252  -2.113  1.00  0.72           N  
ATOM   3243  CA  CYS A 412     -35.757   6.730  -3.254  1.00  0.72           C  
ATOM   3244  C   CYS A 412     -35.487   7.902  -4.165  1.00  0.72           C  
ATOM   3245  O   CYS A 412     -36.374   8.356  -4.886  1.00  0.72           O  
ATOM   3246  CB  CYS A 412     -36.627   5.620  -3.919  1.00  0.72           C  
ATOM   3247  SG  CYS A 412     -36.099   4.979  -5.549  1.00  0.72           S  
ATOM   3248  N   GLU A 413     -34.239   8.401  -4.133  1.00  0.66           N  
ATOM   3249  CA  GLU A 413     -33.800   9.563  -4.867  1.00  0.66           C  
ATOM   3250  C   GLU A 413     -33.199   9.071  -6.167  1.00  0.66           C  
ATOM   3251  O   GLU A 413     -32.196   8.358  -6.192  1.00  0.66           O  
ATOM   3252  CB  GLU A 413     -32.768  10.358  -4.027  1.00  0.66           C  
ATOM   3253  CG  GLU A 413     -32.047  11.497  -4.784  1.00  0.66           C  
ATOM   3254  CD  GLU A 413     -31.196  12.443  -3.930  1.00  0.66           C  
ATOM   3255  OE1 GLU A 413     -30.882  12.102  -2.765  1.00  0.66           O  
ATOM   3256  OE2 GLU A 413     -30.900  13.558  -4.440  1.00  0.66           O  
ATOM   3257  N   ASN A 414     -33.854   9.386  -7.300  1.00  0.56           N  
ATOM   3258  CA  ASN A 414     -33.531   8.775  -8.569  1.00  0.56           C  
ATOM   3259  C   ASN A 414     -32.923   9.809  -9.504  1.00  0.56           C  
ATOM   3260  O   ASN A 414     -33.629  10.615 -10.115  1.00  0.56           O  
ATOM   3261  CB  ASN A 414     -34.839   8.184  -9.159  1.00  0.56           C  
ATOM   3262  CG  ASN A 414     -34.548   7.189 -10.272  1.00  0.56           C  
ATOM   3263  OD1 ASN A 414     -33.430   6.714 -10.451  1.00  0.56           O  
ATOM   3264  ND2 ASN A 414     -35.598   6.831 -11.044  1.00  0.56           N  
ATOM   3265  N   ILE A 415     -31.573   9.793  -9.599  1.00  0.49           N  
ATOM   3266  CA  ILE A 415     -30.758  10.517 -10.568  1.00  0.49           C  
ATOM   3267  C   ILE A 415     -30.495  12.042 -10.281  1.00  0.49           C  
ATOM   3268  O   ILE A 415     -29.845  12.631 -11.141  1.00  0.49           O  
ATOM   3269  CB  ILE A 415     -31.204  10.110 -12.015  1.00  0.49           C  
ATOM   3270  CG1 ILE A 415     -31.056   8.574 -12.216  1.00  0.49           C  
ATOM   3271  CG2 ILE A 415     -30.463  10.818 -13.172  1.00  0.49           C  
ATOM   3272  CD1 ILE A 415     -31.740   8.043 -13.487  1.00  0.49           C  
ATOM   3273  N   PRO A 416     -30.806  12.842  -9.223  1.00  0.54           N  
ATOM   3274  CA  PRO A 416     -30.761  14.300  -9.293  1.00  0.54           C  
ATOM   3275  C   PRO A 416     -29.670  15.127  -9.917  1.00  0.54           C  
ATOM   3276  O   PRO A 416     -28.478  14.903  -9.719  1.00  0.54           O  
ATOM   3277  CB  PRO A 416     -31.134  14.797  -7.900  1.00  0.54           C  
ATOM   3278  CG  PRO A 416     -32.170  13.767  -7.494  1.00  0.54           C  
ATOM   3279  CD  PRO A 416     -31.490  12.489  -7.976  1.00  0.54           C  
ATOM   3280  N   ILE A 417     -30.145  16.157 -10.639  1.00  0.50           N  
ATOM   3281  CA  ILE A 417     -29.389  17.263 -11.158  1.00  0.50           C  
ATOM   3282  C   ILE A 417     -30.011  18.486 -10.506  1.00  0.50           C  
ATOM   3283  O   ILE A 417     -31.220  18.717 -10.600  1.00  0.50           O  
ATOM   3284  CB  ILE A 417     -29.472  17.362 -12.678  1.00  0.50           C  
ATOM   3285  CG1 ILE A 417     -28.960  16.055 -13.339  1.00  0.50           C  
ATOM   3286  CG2 ILE A 417     -28.674  18.598 -13.156  1.00  0.50           C  
ATOM   3287  CD1 ILE A 417     -29.245  15.990 -14.844  1.00  0.50           C  
ATOM   3288  N   VAL A 418     -29.211  19.285  -9.780  1.00  0.60           N  
ATOM   3289  CA  VAL A 418     -29.705  20.476  -9.105  1.00  0.60           C  
ATOM   3290  C   VAL A 418     -28.547  21.447  -8.911  1.00  0.60           C  
ATOM   3291  O   VAL A 418     -27.380  21.062  -8.829  1.00  0.60           O  
ATOM   3292  CB  VAL A 418     -30.470  20.159  -7.804  1.00  0.60           C  
ATOM   3293  CG1 VAL A 418     -29.674  19.199  -6.906  1.00  0.60           C  
ATOM   3294  CG2 VAL A 418     -30.919  21.412  -7.022  1.00  0.60           C  
ATOM   3295  N   THR A 419     -28.849  22.759  -8.879  1.00  0.55           N  
ATOM   3296  CA  THR A 419     -27.898  23.841  -8.689  1.00  0.55           C  
ATOM   3297  C   THR A 419     -28.667  24.961  -8.002  1.00  0.55           C  
ATOM   3298  O   THR A 419     -29.864  25.076  -8.267  1.00  0.55           O  
ATOM   3299  CB  THR A 419     -27.282  24.337 -10.004  1.00  0.55           C  
ATOM   3300  OG1 THR A 419     -26.457  25.483  -9.829  1.00  0.55           O  
ATOM   3301  CG2 THR A 419     -28.353  24.692 -11.046  1.00  0.55           C  
ATOM   3302  N   PRO A 420     -28.093  25.790  -7.126  1.00  0.52           N  
ATOM   3303  CA  PRO A 420     -28.830  26.889  -6.516  1.00  0.52           C  
ATOM   3304  C   PRO A 420     -28.485  28.188  -7.217  1.00  0.52           C  
ATOM   3305  O   PRO A 420     -29.215  29.157  -7.045  1.00  0.52           O  
ATOM   3306  CB  PRO A 420     -28.314  26.895  -5.066  1.00  0.52           C  
ATOM   3307  CG  PRO A 420     -26.861  26.431  -5.186  1.00  0.52           C  
ATOM   3308  CD  PRO A 420     -26.940  25.399  -6.311  1.00  0.52           C  
ATOM   3309  N   SER A 421     -27.369  28.264  -7.974  1.00  0.53           N  
ATOM   3310  CA  SER A 421     -26.954  29.505  -8.625  1.00  0.53           C  
ATOM   3311  C   SER A 421     -27.146  29.464 -10.122  1.00  0.53           C  
ATOM   3312  O   SER A 421     -27.090  30.485 -10.798  1.00  0.53           O  
ATOM   3313  CB  SER A 421     -25.453  29.835  -8.368  1.00  0.53           C  
ATOM   3314  OG  SER A 421     -24.555  28.815  -8.829  1.00  0.53           O  
ATOM   3315  N   GLY A 422     -27.381  28.266 -10.688  1.00  0.57           N  
ATOM   3316  CA  GLY A 422     -27.473  28.051 -12.127  1.00  0.57           C  
ATOM   3317  C   GLY A 422     -26.170  27.577 -12.708  1.00  0.57           C  
ATOM   3318  O   GLY A 422     -26.151  26.949 -13.760  1.00  0.57           O  
ATOM   3319  N   GLU A 423     -25.055  27.816 -11.996  1.00  0.49           N  
ATOM   3320  CA  GLU A 423     -23.720  27.497 -12.466  1.00  0.49           C  
ATOM   3321  C   GLU A 423     -23.089  26.406 -11.623  1.00  0.49           C  
ATOM   3322  O   GLU A 423     -22.551  25.420 -12.124  1.00  0.49           O  
ATOM   3323  CB  GLU A 423     -22.817  28.741 -12.308  1.00  0.49           C  
ATOM   3324  CG  GLU A 423     -23.264  29.976 -13.126  1.00  0.49           C  
ATOM   3325  CD  GLU A 423     -22.443  31.215 -12.768  1.00  0.49           C  
ATOM   3326  OE1 GLU A 423     -21.703  31.168 -11.750  1.00  0.49           O  
ATOM   3327  OE2 GLU A 423     -22.572  32.222 -13.508  1.00  0.49           O  
ATOM   3328  N   VAL A 424     -23.163  26.531 -10.282  1.00  0.47           N  
ATOM   3329  CA  VAL A 424     -22.440  25.645  -9.386  1.00  0.47           C  
ATOM   3330  C   VAL A 424     -23.308  24.460  -9.019  1.00  0.47           C  
ATOM   3331  O   VAL A 424     -24.063  24.474  -8.046  1.00  0.47           O  
ATOM   3332  CB  VAL A 424     -21.926  26.350  -8.134  1.00  0.47           C  
ATOM   3333  CG1 VAL A 424     -21.062  25.382  -7.295  1.00  0.47           C  
ATOM   3334  CG2 VAL A 424     -21.069  27.562  -8.556  1.00  0.47           C  
ATOM   3335  N   VAL A 425     -23.205  23.385  -9.820  1.00  0.54           N  
ATOM   3336  CA  VAL A 425     -23.925  22.133  -9.660  1.00  0.54           C  
ATOM   3337  C   VAL A 425     -23.691  21.489  -8.295  1.00  0.54           C  
ATOM   3338  O   VAL A 425     -22.571  21.448  -7.787  1.00  0.54           O  
ATOM   3339  CB  VAL A 425     -23.559  21.179 -10.797  1.00  0.54           C  
ATOM   3340  CG1 VAL A 425     -24.334  19.854 -10.702  1.00  0.54           C  
ATOM   3341  CG2 VAL A 425     -23.867  21.853 -12.151  1.00  0.54           C  
ATOM   3342  N   VAL A 426     -24.770  21.009  -7.633  1.00  0.60           N  
ATOM   3343  CA  VAL A 426     -24.658  20.408  -6.309  1.00  0.60           C  
ATOM   3344  C   VAL A 426     -25.056  18.952  -6.304  1.00  0.60           C  
ATOM   3345  O   VAL A 426     -24.781  18.234  -5.350  1.00  0.60           O  
ATOM   3346  CB  VAL A 426     -25.439  21.165  -5.232  1.00  0.60           C  
ATOM   3347  CG1 VAL A 426     -25.037  22.648  -5.293  1.00  0.60           C  
ATOM   3348  CG2 VAL A 426     -26.963  21.018  -5.375  1.00  0.60           C  
ATOM   3349  N   ALA A 427     -25.663  18.465  -7.399  1.00  0.67           N  
ATOM   3350  CA  ALA A 427     -25.895  17.057  -7.590  1.00  0.67           C  
ATOM   3351  C   ALA A 427     -25.824  16.788  -9.074  1.00  0.67           C  
ATOM   3352  O   ALA A 427     -26.298  17.594  -9.874  1.00  0.67           O  
ATOM   3353  CB  ALA A 427     -27.257  16.605  -7.037  1.00  0.67           C  
ATOM   3354  N   SER A 428     -25.200  15.669  -9.471  1.00  0.61           N  
ATOM   3355  CA  SER A 428     -25.100  15.256 -10.855  1.00  0.61           C  
ATOM   3356  C   SER A 428     -25.253  13.754 -10.914  1.00  0.61           C  
ATOM   3357  O   SER A 428     -24.358  13.012 -10.518  1.00  0.61           O  
ATOM   3358  CB  SER A 428     -23.734  15.640 -11.477  1.00  0.61           C  
ATOM   3359  OG  SER A 428     -23.730  15.440 -12.893  1.00  0.61           O  
ATOM   3360  N   LEU A 429     -26.420  13.268 -11.387  1.00  0.54           N  
ATOM   3361  CA  LEU A 429     -26.728  11.852 -11.546  1.00  0.54           C  
ATOM   3362  C   LEU A 429     -26.701  11.086 -10.228  1.00  0.54           C  
ATOM   3363  O   LEU A 429     -26.179   9.982 -10.084  1.00  0.54           O  
ATOM   3364  CB  LEU A 429     -25.925  11.179 -12.684  1.00  0.54           C  
ATOM   3365  CG  LEU A 429     -25.976  11.946 -14.029  1.00  0.54           C  
ATOM   3366  CD1 LEU A 429     -25.163  11.210 -15.102  1.00  0.54           C  
ATOM   3367  CD2 LEU A 429     -27.404  12.193 -14.545  1.00  0.54           C  
ATOM   3368  N   ASN A 430     -27.311  11.700  -9.206  1.00  0.61           N  
ATOM   3369  CA  ASN A 430     -27.223  11.297  -7.827  1.00  0.61           C  
ATOM   3370  C   ASN A 430     -28.260  10.215  -7.485  1.00  0.61           C  
ATOM   3371  O   ASN A 430     -29.425  10.494  -7.274  1.00  0.61           O  
ATOM   3372  CB  ASN A 430     -27.432  12.623  -7.042  1.00  0.61           C  
ATOM   3373  CG  ASN A 430     -27.082  12.521  -5.573  1.00  0.61           C  
ATOM   3374  OD1 ASN A 430     -27.893  12.044  -4.778  1.00  0.61           O  
ATOM   3375  ND2 ASN A 430     -25.864  12.955  -5.187  1.00  0.61           N  
ATOM   3376  N   ILE A 431     -27.907   8.918  -7.437  1.00  0.59           N  
ATOM   3377  CA  ILE A 431     -28.890   7.889  -7.093  1.00  0.59           C  
ATOM   3378  C   ILE A 431     -28.629   7.291  -5.715  1.00  0.59           C  
ATOM   3379  O   ILE A 431     -27.527   6.840  -5.416  1.00  0.59           O  
ATOM   3380  CB  ILE A 431     -29.022   6.828  -8.187  1.00  0.59           C  
ATOM   3381  CG1 ILE A 431     -30.167   5.837  -7.870  1.00  0.59           C  
ATOM   3382  CG2 ILE A 431     -27.677   6.117  -8.460  1.00  0.59           C  
ATOM   3383  CD1 ILE A 431     -30.651   5.063  -9.099  1.00  0.59           C  
ATOM   3384  N   ARG A 432     -29.648   7.302  -4.824  1.00  0.66           N  
ATOM   3385  CA  ARG A 432     -29.555   6.699  -3.502  1.00  0.66           C  
ATOM   3386  C   ARG A 432     -30.919   6.177  -3.072  1.00  0.66           C  
ATOM   3387  O   ARG A 432     -31.965   6.749  -3.388  1.00  0.66           O  
ATOM   3388  CB  ARG A 432     -29.020   7.681  -2.411  1.00  0.66           C  
ATOM   3389  CG  ARG A 432     -29.949   8.866  -2.081  1.00  0.66           C  
ATOM   3390  CD  ARG A 432     -29.422   9.980  -1.162  1.00  0.66           C  
ATOM   3391  NE  ARG A 432     -29.026   9.448   0.182  1.00  0.66           N  
ATOM   3392  CZ  ARG A 432     -28.778  10.245   1.227  1.00  0.66           C  
ATOM   3393  NH1 ARG A 432     -28.721   9.727   2.447  1.00  0.66           N  
ATOM   3394  NH2 ARG A 432     -28.630  11.556   1.097  1.00  0.66           N  
ATOM   3395  N   VAL A 433     -30.959   5.059  -2.323  1.00  0.71           N  
ATOM   3396  CA  VAL A 433     -32.205   4.521  -1.788  1.00  0.71           C  
ATOM   3397  C   VAL A 433     -32.106   4.475  -0.280  1.00  0.71           C  
ATOM   3398  O   VAL A 433     -31.120   3.994   0.264  1.00  0.71           O  
ATOM   3399  CB  VAL A 433     -32.514   3.119  -2.318  1.00  0.71           C  
ATOM   3400  CG1 VAL A 433     -33.829   2.564  -1.726  1.00  0.71           C  
ATOM   3401  CG2 VAL A 433     -32.608   3.169  -3.856  1.00  0.71           C  
ATOM   3402  N   GLU A 434     -33.129   4.977   0.442  1.00  0.69           N  
ATOM   3403  CA  GLU A 434     -33.214   4.876   1.884  1.00  0.69           C  
ATOM   3404  C   GLU A 434     -34.371   3.973   2.251  1.00  0.69           C  
ATOM   3405  O   GLU A 434     -35.544   4.346   2.207  1.00  0.69           O  
ATOM   3406  CB  GLU A 434     -33.402   6.262   2.544  1.00  0.69           C  
ATOM   3407  CG  GLU A 434     -32.289   7.263   2.157  1.00  0.69           C  
ATOM   3408  CD  GLU A 434     -32.405   8.605   2.861  1.00  0.69           C  
ATOM   3409  OE1 GLU A 434     -33.467   8.945   3.428  1.00  0.69           O  
ATOM   3410  OE2 GLU A 434     -31.367   9.318   2.850  1.00  0.69           O  
ATOM   3411  N   GLU A 435     -34.054   2.720   2.621  1.00  0.61           N  
ATOM   3412  CA  GLU A 435     -35.029   1.737   3.036  1.00  0.61           C  
ATOM   3413  C   GLU A 435     -35.601   2.019   4.417  1.00  0.61           C  
ATOM   3414  O   GLU A 435     -34.875   2.326   5.359  1.00  0.61           O  
ATOM   3415  CB  GLU A 435     -34.425   0.323   3.009  1.00  0.61           C  
ATOM   3416  CG  GLU A 435     -33.877  -0.095   1.626  1.00  0.61           C  
ATOM   3417  CD  GLU A 435     -33.451  -1.563   1.607  1.00  0.61           C  
ATOM   3418  OE1 GLU A 435     -33.622  -2.257   2.643  1.00  0.61           O  
ATOM   3419  OE2 GLU A 435     -32.963  -1.995   0.533  1.00  0.61           O  
ATOM   3420  N   GLY A 436     -36.940   1.921   4.567  1.00  0.61           N  
ATOM   3421  CA  GLY A 436     -37.671   2.203   5.804  1.00  0.61           C  
ATOM   3422  C   GLY A 436     -37.162   1.514   7.049  1.00  0.61           C  
ATOM   3423  O   GLY A 436     -36.881   0.321   7.037  1.00  0.61           O  
ATOM   3424  N   MET A 437     -37.041   2.277   8.158  1.00  0.55           N  
ATOM   3425  CA  MET A 437     -36.582   1.827   9.472  1.00  0.55           C  
ATOM   3426  C   MET A 437     -35.089   1.517   9.572  1.00  0.55           C  
ATOM   3427  O   MET A 437     -34.601   1.095  10.619  1.00  0.55           O  
ATOM   3428  CB  MET A 437     -37.417   0.651  10.054  1.00  0.55           C  
ATOM   3429  CG  MET A 437     -38.917   0.965  10.227  1.00  0.55           C  
ATOM   3430  SD  MET A 437     -39.285   2.324  11.385  1.00  0.55           S  
ATOM   3431  CE  MET A 437     -38.770   1.452  12.894  1.00  0.55           C  
ATOM   3432  N   HIS A 438     -34.308   1.775   8.507  1.00  0.59           N  
ATOM   3433  CA  HIS A 438     -32.872   1.573   8.510  1.00  0.59           C  
ATOM   3434  C   HIS A 438     -32.128   2.870   8.764  1.00  0.59           C  
ATOM   3435  O   HIS A 438     -32.667   3.972   8.665  1.00  0.59           O  
ATOM   3436  CB  HIS A 438     -32.384   0.993   7.169  1.00  0.59           C  
ATOM   3437  CG  HIS A 438     -32.868  -0.399   6.922  1.00  0.59           C  
ATOM   3438  ND1 HIS A 438     -32.111  -1.469   7.361  1.00  0.59           N  
ATOM   3439  CD2 HIS A 438     -33.930  -0.837   6.203  1.00  0.59           C  
ATOM   3440  CE1 HIS A 438     -32.727  -2.535   6.887  1.00  0.59           C  
ATOM   3441  NE2 HIS A 438     -33.831  -2.209   6.175  1.00  0.59           N  
ATOM   3442  N   LEU A 439     -30.836   2.759   9.116  1.00  0.66           N  
ATOM   3443  CA  LEU A 439     -29.955   3.891   9.308  1.00  0.66           C  
ATOM   3444  C   LEU A 439     -29.042   4.020   8.096  1.00  0.66           C  
ATOM   3445  O   LEU A 439     -28.249   3.123   7.806  1.00  0.66           O  
ATOM   3446  CB  LEU A 439     -29.068   3.701  10.569  1.00  0.66           C  
ATOM   3447  CG  LEU A 439     -29.725   4.016  11.932  1.00  0.66           C  
ATOM   3448  CD1 LEU A 439     -31.002   3.223  12.248  1.00  0.66           C  
ATOM   3449  CD2 LEU A 439     -28.723   3.843  13.085  1.00  0.66           C  
ATOM   3450  N   LEU A 440     -29.138   5.149   7.365  1.00  0.67           N  
ATOM   3451  CA  LEU A 440     -28.372   5.423   6.165  1.00  0.67           C  
ATOM   3452  C   LEU A 440     -27.537   6.676   6.291  1.00  0.67           C  
ATOM   3453  O   LEU A 440     -27.931   7.664   6.904  1.00  0.67           O  
ATOM   3454  CB  LEU A 440     -29.255   5.544   4.913  1.00  0.67           C  
ATOM   3455  CG  LEU A 440     -29.716   4.170   4.407  1.00  0.67           C  
ATOM   3456  CD1 LEU A 440     -31.110   3.785   4.918  1.00  0.67           C  
ATOM   3457  CD2 LEU A 440     -29.663   4.179   2.885  1.00  0.67           C  
ATOM   3458  N   ILE A 441     -26.305   6.657   5.746  1.00  0.64           N  
ATOM   3459  CA  ILE A 441     -25.333   7.698   6.041  1.00  0.64           C  
ATOM   3460  C   ILE A 441     -24.818   8.397   4.798  1.00  0.64           C  
ATOM   3461  O   ILE A 441     -24.384   7.780   3.835  1.00  0.64           O  
ATOM   3462  CB  ILE A 441     -24.159   7.165   6.851  1.00  0.64           C  
ATOM   3463  CG1 ILE A 441     -24.614   6.285   8.043  1.00  0.64           C  
ATOM   3464  CG2 ILE A 441     -23.269   8.326   7.341  1.00  0.64           C  
ATOM   3465  CD1 ILE A 441     -25.667   6.896   8.971  1.00  0.64           C  
ATOM   3466  N   THR A 442     -24.829   9.741   4.827  1.00  0.66           N  
ATOM   3467  CA  THR A 442     -24.314  10.632   3.799  1.00  0.66           C  
ATOM   3468  C   THR A 442     -22.868  10.965   4.095  1.00  0.66           C  
ATOM   3469  O   THR A 442     -22.556  11.654   5.072  1.00  0.66           O  
ATOM   3470  CB  THR A 442     -25.100  11.943   3.778  1.00  0.66           C  
ATOM   3471  OG1 THR A 442     -26.414  11.720   3.288  1.00  0.66           O  
ATOM   3472  CG2 THR A 442     -24.466  13.039   2.901  1.00  0.66           C  
ATOM   3473  N   GLY A 443     -21.928  10.487   3.254  1.00  0.57           N  
ATOM   3474  CA  GLY A 443     -20.504  10.751   3.426  1.00  0.57           C  
ATOM   3475  C   GLY A 443     -19.820  11.466   2.302  1.00  0.57           C  
ATOM   3476  O   GLY A 443     -19.588  10.861   1.262  1.00  0.57           O  
ATOM   3477  N   PRO A 444     -19.419  12.713   2.503  1.00  0.54           N  
ATOM   3478  CA  PRO A 444     -18.449  13.279   1.580  1.00  0.54           C  
ATOM   3479  C   PRO A 444     -17.533  14.274   2.268  1.00  0.54           C  
ATOM   3480  O   PRO A 444     -17.680  14.588   3.453  1.00  0.54           O  
ATOM   3481  CB  PRO A 444     -19.355  14.024   0.599  1.00  0.54           C  
ATOM   3482  CG  PRO A 444     -20.460  14.610   1.487  1.00  0.54           C  
ATOM   3483  CD  PRO A 444     -20.481  13.701   2.732  1.00  0.54           C  
ATOM   3484  N   ASN A 445     -16.556  14.790   1.504  1.00  0.44           N  
ATOM   3485  CA  ASN A 445     -15.716  15.927   1.842  1.00  0.44           C  
ATOM   3486  C   ASN A 445     -16.475  17.195   2.248  1.00  0.44           C  
ATOM   3487  O   ASN A 445     -17.637  17.413   1.899  1.00  0.44           O  
ATOM   3488  CB  ASN A 445     -14.790  16.300   0.652  1.00  0.44           C  
ATOM   3489  CG  ASN A 445     -13.896  15.119   0.299  1.00  0.44           C  
ATOM   3490  OD1 ASN A 445     -13.451  14.362   1.157  1.00  0.44           O  
ATOM   3491  ND2 ASN A 445     -13.608  14.947  -1.011  1.00  0.44           N  
ATOM   3492  N   GLY A 446     -15.801  18.112   2.985  1.00  0.43           N  
ATOM   3493  CA  GLY A 446     -16.280  19.481   3.193  1.00  0.43           C  
ATOM   3494  C   GLY A 446     -16.616  20.200   1.903  1.00  0.43           C  
ATOM   3495  O   GLY A 446     -15.904  20.077   0.912  1.00  0.43           O  
ATOM   3496  N   CYS A 447     -17.755  20.923   1.884  1.00  0.43           N  
ATOM   3497  CA  CYS A 447     -18.324  21.572   0.705  1.00  0.43           C  
ATOM   3498  C   CYS A 447     -18.869  20.605  -0.344  1.00  0.43           C  
ATOM   3499  O   CYS A 447     -19.340  21.022  -1.401  1.00  0.43           O  
ATOM   3500  CB  CYS A 447     -17.399  22.640   0.061  1.00  0.43           C  
ATOM   3501  SG  CYS A 447     -16.991  23.964   1.246  1.00  0.43           S  
ATOM   3502  N   GLY A 448     -18.923  19.293  -0.011  1.00  0.55           N  
ATOM   3503  CA  GLY A 448     -19.394  18.199  -0.857  1.00  0.55           C  
ATOM   3504  C   GLY A 448     -20.884  18.091  -0.958  1.00  0.55           C  
ATOM   3505  O   GLY A 448     -21.387  17.199  -1.620  1.00  0.55           O  
ATOM   3506  N   LYS A 449     -21.606  19.013  -0.289  1.00  0.59           N  
ATOM   3507  CA  LYS A 449     -23.019  19.304  -0.488  1.00  0.59           C  
ATOM   3508  C   LYS A 449     -23.958  18.472   0.373  1.00  0.59           C  
ATOM   3509  O   LYS A 449     -25.146  18.367   0.085  1.00  0.59           O  
ATOM   3510  CB  LYS A 449     -23.477  19.329  -1.978  1.00  0.59           C  
ATOM   3511  CG  LYS A 449     -22.591  20.162  -2.928  1.00  0.59           C  
ATOM   3512  CD  LYS A 449     -22.600  21.679  -2.679  1.00  0.59           C  
ATOM   3513  CE  LYS A 449     -21.667  22.409  -3.654  1.00  0.59           C  
ATOM   3514  NZ  LYS A 449     -21.853  23.873  -3.546  1.00  0.59           N  
ATOM   3515  N   SER A 450     -23.482  17.954   1.531  1.00  0.66           N  
ATOM   3516  CA  SER A 450     -24.246  17.076   2.424  1.00  0.66           C  
ATOM   3517  C   SER A 450     -25.587  17.637   2.878  1.00  0.66           C  
ATOM   3518  O   SER A 450     -26.595  16.937   2.934  1.00  0.66           O  
ATOM   3519  CB  SER A 450     -23.470  16.719   3.724  1.00  0.66           C  
ATOM   3520  OG  SER A 450     -22.097  16.424   3.472  1.00  0.66           O  
ATOM   3521  N   SER A 451     -25.621  18.951   3.163  1.00  0.70           N  
ATOM   3522  CA  SER A 451     -26.795  19.722   3.536  1.00  0.70           C  
ATOM   3523  C   SER A 451     -27.923  19.713   2.523  1.00  0.70           C  
ATOM   3524  O   SER A 451     -29.099  19.791   2.878  1.00  0.70           O  
ATOM   3525  CB  SER A 451     -26.443  21.224   3.720  1.00  0.70           C  
ATOM   3526  OG  SER A 451     -25.344  21.387   4.615  1.00  0.70           O  
ATOM   3527  N   LEU A 452     -27.586  19.666   1.217  1.00  0.67           N  
ATOM   3528  CA  LEU A 452     -28.513  19.832   0.110  1.00  0.67           C  
ATOM   3529  C   LEU A 452     -29.555  18.727   0.027  1.00  0.67           C  
ATOM   3530  O   LEU A 452     -30.701  18.986  -0.329  1.00  0.67           O  
ATOM   3531  CB  LEU A 452     -27.785  20.037  -1.247  1.00  0.67           C  
ATOM   3532  CG  LEU A 452     -27.275  21.478  -1.526  1.00  0.67           C  
ATOM   3533  CD1 LEU A 452     -28.437  22.447  -1.803  1.00  0.67           C  
ATOM   3534  CD2 LEU A 452     -26.346  22.055  -0.446  1.00  0.67           C  
ATOM   3535  N   PHE A 453     -29.221  17.479   0.417  1.00  0.67           N  
ATOM   3536  CA  PHE A 453     -30.184  16.384   0.492  1.00  0.67           C  
ATOM   3537  C   PHE A 453     -31.331  16.668   1.448  1.00  0.67           C  
ATOM   3538  O   PHE A 453     -32.500  16.464   1.143  1.00  0.67           O  
ATOM   3539  CB  PHE A 453     -29.510  15.071   0.969  1.00  0.67           C  
ATOM   3540  CG  PHE A 453     -28.389  14.716   0.043  1.00  0.67           C  
ATOM   3541  CD1 PHE A 453     -28.648  14.476  -1.314  1.00  0.67           C  
ATOM   3542  CD2 PHE A 453     -27.065  14.648   0.511  1.00  0.67           C  
ATOM   3543  CE1 PHE A 453     -27.598  14.231  -2.202  1.00  0.67           C  
ATOM   3544  CE2 PHE A 453     -26.012  14.392  -0.375  1.00  0.67           C  
ATOM   3545  CZ  PHE A 453     -26.280  14.199  -1.735  1.00  0.67           C  
ATOM   3546  N   ARG A 454     -31.023  17.227   2.632  1.00  0.67           N  
ATOM   3547  CA  ARG A 454     -32.022  17.655   3.591  1.00  0.67           C  
ATOM   3548  C   ARG A 454     -32.886  18.804   3.081  1.00  0.67           C  
ATOM   3549  O   ARG A 454     -34.092  18.852   3.309  1.00  0.67           O  
ATOM   3550  CB  ARG A 454     -31.347  18.089   4.906  1.00  0.67           C  
ATOM   3551  CG  ARG A 454     -30.424  17.022   5.529  1.00  0.67           C  
ATOM   3552  CD  ARG A 454     -29.849  17.390   6.906  1.00  0.67           C  
ATOM   3553  NE  ARG A 454     -28.847  18.494   6.727  1.00  0.67           N  
ATOM   3554  CZ  ARG A 454     -29.053  19.813   6.823  1.00  0.67           C  
ATOM   3555  NH1 ARG A 454     -27.985  20.601   6.791  1.00  0.67           N  
ATOM   3556  NH2 ARG A 454     -30.256  20.353   6.927  1.00  0.67           N  
ATOM   3557  N   ILE A 455     -32.262  19.755   2.356  1.00  0.66           N  
ATOM   3558  CA  ILE A 455     -32.921  20.866   1.683  1.00  0.66           C  
ATOM   3559  C   ILE A 455     -33.910  20.391   0.612  1.00  0.66           C  
ATOM   3560  O   ILE A 455     -35.045  20.866   0.546  1.00  0.66           O  
ATOM   3561  CB  ILE A 455     -31.851  21.823   1.132  1.00  0.66           C  
ATOM   3562  CG1 ILE A 455     -31.100  22.514   2.300  1.00  0.66           C  
ATOM   3563  CG2 ILE A 455     -32.441  22.858   0.154  1.00  0.66           C  
ATOM   3564  CD1 ILE A 455     -29.873  23.331   1.876  1.00  0.66           C  
ATOM   3565  N   LEU A 456     -33.533  19.400  -0.227  1.00  0.62           N  
ATOM   3566  CA  LEU A 456     -34.457  18.737  -1.141  1.00  0.62           C  
ATOM   3567  C   LEU A 456     -35.525  17.910  -0.437  1.00  0.62           C  
ATOM   3568  O   LEU A 456     -36.700  17.959  -0.793  1.00  0.62           O  
ATOM   3569  CB  LEU A 456     -33.731  17.809  -2.149  1.00  0.62           C  
ATOM   3570  CG  LEU A 456     -32.727  18.495  -3.099  1.00  0.62           C  
ATOM   3571  CD1 LEU A 456     -32.249  17.488  -4.158  1.00  0.62           C  
ATOM   3572  CD2 LEU A 456     -33.296  19.752  -3.776  1.00  0.62           C  
ATOM   3573  N   GLY A 457     -35.147  17.140   0.605  1.00  0.74           N  
ATOM   3574  CA  GLY A 457     -36.039  16.265   1.361  1.00  0.74           C  
ATOM   3575  C   GLY A 457     -37.152  16.948   2.108  1.00  0.74           C  
ATOM   3576  O   GLY A 457     -38.211  16.368   2.310  1.00  0.74           O  
ATOM   3577  N   GLY A 458     -36.952  18.215   2.518  1.00  0.71           N  
ATOM   3578  CA  GLY A 458     -38.012  19.057   3.068  1.00  0.71           C  
ATOM   3579  C   GLY A 458     -38.868  19.740   2.029  1.00  0.71           C  
ATOM   3580  O   GLY A 458     -39.794  20.475   2.370  1.00  0.71           O  
ATOM   3581  N   LEU A 459     -38.548  19.560   0.731  1.00  0.61           N  
ATOM   3582  CA  LEU A 459     -39.133  20.253  -0.407  1.00  0.61           C  
ATOM   3583  C   LEU A 459     -39.015  21.766  -0.288  1.00  0.61           C  
ATOM   3584  O   LEU A 459     -39.976  22.521  -0.412  1.00  0.61           O  
ATOM   3585  CB  LEU A 459     -40.572  19.760  -0.737  1.00  0.61           C  
ATOM   3586  CG  LEU A 459     -41.188  20.225  -2.084  1.00  0.61           C  
ATOM   3587  CD1 LEU A 459     -40.253  20.083  -3.296  1.00  0.61           C  
ATOM   3588  CD2 LEU A 459     -42.505  19.483  -2.357  1.00  0.61           C  
ATOM   3589  N   TRP A 460     -37.799  22.267   0.002  1.00  0.54           N  
ATOM   3590  CA  TRP A 460     -37.557  23.695   0.086  1.00  0.54           C  
ATOM   3591  C   TRP A 460     -37.334  24.299  -1.306  1.00  0.54           C  
ATOM   3592  O   TRP A 460     -37.950  25.324  -1.623  1.00  0.54           O  
ATOM   3593  CB  TRP A 460     -36.458  23.999   1.136  1.00  0.54           C  
ATOM   3594  CG  TRP A 460     -36.803  23.576   2.560  1.00  0.54           C  
ATOM   3595  CD1 TRP A 460     -38.006  23.210   3.108  1.00  0.54           C  
ATOM   3596  CD2 TRP A 460     -35.826  23.436   3.607  1.00  0.54           C  
ATOM   3597  NE1 TRP A 460     -37.839  22.845   4.425  1.00  0.54           N  
ATOM   3598  CE2 TRP A 460     -36.510  22.970   4.751  1.00  0.54           C  
ATOM   3599  CE3 TRP A 460     -34.454  23.664   3.635  1.00  0.54           C  
ATOM   3600  CZ2 TRP A 460     -35.829  22.718   5.932  1.00  0.54           C  
ATOM   3601  CZ3 TRP A 460     -33.771  23.440   4.840  1.00  0.54           C  
ATOM   3602  CH2 TRP A 460     -34.449  22.968   5.974  1.00  0.54           C  
ATOM   3603  N   PRO A 461     -36.557  23.671  -2.191  1.00  0.56           N  
ATOM   3604  CA  PRO A 461     -36.681  23.906  -3.615  1.00  0.56           C  
ATOM   3605  C   PRO A 461     -36.931  22.593  -4.338  1.00  0.56           C  
ATOM   3606  O   PRO A 461     -36.806  21.511  -3.766  1.00  0.56           O  
ATOM   3607  CB  PRO A 461     -35.295  24.457  -3.975  1.00  0.56           C  
ATOM   3608  CG  PRO A 461     -34.355  23.587  -3.134  1.00  0.56           C  
ATOM   3609  CD  PRO A 461     -35.172  23.311  -1.863  1.00  0.56           C  
ATOM   3610  N   THR A 462     -37.298  22.677  -5.625  1.00  0.51           N  
ATOM   3611  CA  THR A 462     -37.403  21.523  -6.506  1.00  0.51           C  
ATOM   3612  C   THR A 462     -36.099  21.379  -7.266  1.00  0.51           C  
ATOM   3613  O   THR A 462     -35.459  22.361  -7.632  1.00  0.51           O  
ATOM   3614  CB  THR A 462     -38.549  21.630  -7.511  1.00  0.51           C  
ATOM   3615  OG1 THR A 462     -39.756  21.946  -6.834  1.00  0.51           O  
ATOM   3616  CG2 THR A 462     -38.803  20.298  -8.235  1.00  0.51           C  
ATOM   3617  N   TYR A 463     -35.653  20.130  -7.496  1.00  0.41           N  
ATOM   3618  CA  TYR A 463     -34.639  19.733  -8.464  1.00  0.41           C  
ATOM   3619  C   TYR A 463     -34.775  20.311  -9.887  1.00  0.41           C  
ATOM   3620  O   TYR A 463     -35.820  20.825 -10.274  1.00  0.41           O  
ATOM   3621  CB  TYR A 463     -34.567  18.181  -8.498  1.00  0.41           C  
ATOM   3622  CG  TYR A 463     -35.940  17.571  -8.680  1.00  0.41           C  
ATOM   3623  CD1 TYR A 463     -36.610  17.650  -9.913  1.00  0.41           C  
ATOM   3624  CD2 TYR A 463     -36.579  16.925  -7.606  1.00  0.41           C  
ATOM   3625  CE1 TYR A 463     -37.878  17.085 -10.076  1.00  0.41           C  
ATOM   3626  CE2 TYR A 463     -37.861  16.379  -7.761  1.00  0.41           C  
ATOM   3627  CZ  TYR A 463     -38.492  16.435  -9.005  1.00  0.41           C  
ATOM   3628  OH  TYR A 463     -39.718  15.783  -9.208  1.00  0.41           O  
ATOM   3629  N   GLY A 464     -33.721  20.200 -10.734  1.00  0.45           N  
ATOM   3630  CA  GLY A 464     -33.784  20.684 -12.118  1.00  0.45           C  
ATOM   3631  C   GLY A 464     -34.579  19.808 -13.063  1.00  0.45           C  
ATOM   3632  O   GLY A 464     -35.275  20.293 -13.947  1.00  0.45           O  
ATOM   3633  N   GLY A 465     -34.501  18.477 -12.898  1.00  0.36           N  
ATOM   3634  CA  GLY A 465     -35.331  17.547 -13.662  1.00  0.36           C  
ATOM   3635  C   GLY A 465     -34.849  16.142 -13.457  1.00  0.36           C  
ATOM   3636  O   GLY A 465     -33.751  15.831 -13.890  1.00  0.36           O  
ATOM   3637  N   VAL A 466     -35.660  15.299 -12.761  1.00  0.38           N  
ATOM   3638  CA  VAL A 466     -35.333  14.012 -12.122  1.00  0.38           C  
ATOM   3639  C   VAL A 466     -36.492  13.736 -11.170  1.00  0.38           C  
ATOM   3640  O   VAL A 466     -37.505  14.427 -11.246  1.00  0.38           O  
ATOM   3641  CB  VAL A 466     -34.051  13.991 -11.281  1.00  0.38           C  
ATOM   3642  CG1 VAL A 466     -32.857  13.637 -12.188  1.00  0.38           C  
ATOM   3643  CG2 VAL A 466     -33.952  15.323 -10.507  1.00  0.38           C  
ATOM   3644  N   LEU A 467     -36.395  12.743 -10.248  1.00  0.48           N  
ATOM   3645  CA  LEU A 467     -37.318  12.631  -9.127  1.00  0.48           C  
ATOM   3646  C   LEU A 467     -36.575  12.314  -7.822  1.00  0.48           C  
ATOM   3647  O   LEU A 467     -36.029  11.227  -7.652  1.00  0.48           O  
ATOM   3648  CB  LEU A 467     -38.396  11.524  -9.330  1.00  0.48           C  
ATOM   3649  CG  LEU A 467     -39.369  11.736 -10.517  1.00  0.48           C  
ATOM   3650  CD1 LEU A 467     -38.857  11.124 -11.832  1.00  0.48           C  
ATOM   3651  CD2 LEU A 467     -40.760  11.164 -10.199  1.00  0.48           C  
ATOM   3652  N   TYR A 468     -36.575  13.235  -6.825  1.00  0.52           N  
ATOM   3653  CA  TYR A 468     -36.127  12.937  -5.458  1.00  0.52           C  
ATOM   3654  C   TYR A 468     -37.191  12.157  -4.673  1.00  0.52           C  
ATOM   3655  O   TYR A 468     -36.885  11.391  -3.766  1.00  0.52           O  
ATOM   3656  CB  TYR A 468     -35.758  14.266  -4.709  1.00  0.52           C  
ATOM   3657  CG  TYR A 468     -35.179  14.077  -3.314  1.00  0.52           C  
ATOM   3658  CD1 TYR A 468     -33.799  14.189  -3.088  1.00  0.52           C  
ATOM   3659  CD2 TYR A 468     -36.002  13.798  -2.206  1.00  0.52           C  
ATOM   3660  CE1 TYR A 468     -33.252  13.967  -1.814  1.00  0.52           C  
ATOM   3661  CE2 TYR A 468     -35.461  13.545  -0.939  1.00  0.52           C  
ATOM   3662  CZ  TYR A 468     -34.080  13.623  -0.743  1.00  0.52           C  
ATOM   3663  OH  TYR A 468     -33.524  13.337   0.521  1.00  0.52           O  
ATOM   3664  N   LYS A 469     -38.482  12.364  -5.021  1.00  0.58           N  
ATOM   3665  CA  LYS A 469     -39.645  12.061  -4.188  1.00  0.58           C  
ATOM   3666  C   LYS A 469     -39.714  12.814  -2.845  1.00  0.58           C  
ATOM   3667  O   LYS A 469     -39.792  12.151  -1.811  1.00  0.58           O  
ATOM   3668  CB  LYS A 469     -39.831  10.535  -3.961  1.00  0.58           C  
ATOM   3669  CG  LYS A 469     -39.826   9.715  -5.259  1.00  0.58           C  
ATOM   3670  CD  LYS A 469     -39.823   8.203  -4.987  1.00  0.58           C  
ATOM   3671  CE  LYS A 469     -39.695   7.384  -6.274  1.00  0.58           C  
ATOM   3672  NZ  LYS A 469     -39.558   5.944  -5.965  1.00  0.58           N  
ATOM   3673  N   PRO A 470     -39.670  14.157  -2.760  1.00  0.65           N  
ATOM   3674  CA  PRO A 470     -39.777  14.890  -1.496  1.00  0.65           C  
ATOM   3675  C   PRO A 470     -41.055  14.619  -0.695  1.00  0.65           C  
ATOM   3676  O   PRO A 470     -42.119  14.805  -1.290  1.00  0.65           O  
ATOM   3677  CB  PRO A 470     -39.676  16.365  -1.898  1.00  0.65           C  
ATOM   3678  CG  PRO A 470     -38.941  16.320  -3.233  1.00  0.65           C  
ATOM   3679  CD  PRO A 470     -39.568  15.093  -3.880  1.00  0.65           C  
ATOM   3680  N   PRO A 471     -41.059  14.216   0.572  1.00  0.67           N  
ATOM   3681  CA  PRO A 471     -42.304  13.844   1.244  1.00  0.67           C  
ATOM   3682  C   PRO A 471     -42.888  15.025   2.003  1.00  0.67           C  
ATOM   3683  O   PRO A 471     -42.247  16.074   2.036  1.00  0.67           O  
ATOM   3684  CB  PRO A 471     -41.859  12.751   2.239  1.00  0.67           C  
ATOM   3685  CG  PRO A 471     -40.492  12.316   1.733  1.00  0.67           C  
ATOM   3686  CD  PRO A 471     -39.906  13.617   1.238  1.00  0.67           C  
ATOM   3687  N   PRO A 472     -44.061  14.932   2.632  1.00  0.63           N  
ATOM   3688  CA  PRO A 472     -44.521  15.908   3.614  1.00  0.63           C  
ATOM   3689  C   PRO A 472     -43.524  16.284   4.704  1.00  0.63           C  
ATOM   3690  O   PRO A 472     -42.955  15.409   5.357  1.00  0.63           O  
ATOM   3691  CB  PRO A 472     -45.796  15.277   4.207  1.00  0.63           C  
ATOM   3692  CG  PRO A 472     -46.284  14.326   3.110  1.00  0.63           C  
ATOM   3693  CD  PRO A 472     -44.973  13.789   2.540  1.00  0.63           C  
ATOM   3694  N   GLN A 473     -43.376  17.592   4.995  1.00  0.61           N  
ATOM   3695  CA  GLN A 473     -42.557  18.139   6.067  1.00  0.61           C  
ATOM   3696  C   GLN A 473     -43.018  17.613   7.416  1.00  0.61           C  
ATOM   3697  O   GLN A 473     -42.236  17.293   8.309  1.00  0.61           O  
ATOM   3698  CB  GLN A 473     -42.599  19.692   6.087  1.00  0.61           C  
ATOM   3699  CG  GLN A 473     -42.093  20.378   4.792  1.00  0.61           C  
ATOM   3700  CD  GLN A 473     -43.101  20.322   3.639  1.00  0.61           C  
ATOM   3701  OE1 GLN A 473     -44.258  19.923   3.799  1.00  0.61           O  
ATOM   3702  NE2 GLN A 473     -42.645  20.698   2.426  1.00  0.61           N  
ATOM   3703  N   ARG A 474     -44.340  17.428   7.573  1.00  0.54           N  
ATOM   3704  CA  ARG A 474     -44.935  16.730   8.694  1.00  0.54           C  
ATOM   3705  C   ARG A 474     -44.565  15.245   8.857  1.00  0.54           C  
ATOM   3706  O   ARG A 474     -45.055  14.604   9.772  1.00  0.54           O  
ATOM   3707  CB  ARG A 474     -46.479  16.887   8.693  1.00  0.54           C  
ATOM   3708  CG  ARG A 474     -46.927  18.366   8.705  1.00  0.54           C  
ATOM   3709  CD  ARG A 474     -48.363  18.617   9.191  1.00  0.54           C  
ATOM   3710  NE  ARG A 474     -49.283  18.136   8.114  1.00  0.54           N  
ATOM   3711  CZ  ARG A 474     -50.597  17.959   8.304  1.00  0.54           C  
ATOM   3712  NH1 ARG A 474     -51.326  17.440   7.314  1.00  0.54           N  
ATOM   3713  NH2 ARG A 474     -51.208  18.297   9.432  1.00  0.54           N  
ATOM   3714  N   MET A 475     -43.678  14.640   8.035  1.00  0.59           N  
ATOM   3715  CA  MET A 475     -43.166  13.295   8.293  1.00  0.59           C  
ATOM   3716  C   MET A 475     -41.644  13.250   8.405  1.00  0.59           C  
ATOM   3717  O   MET A 475     -41.074  12.214   8.738  1.00  0.59           O  
ATOM   3718  CB  MET A 475     -43.633  12.340   7.174  1.00  0.59           C  
ATOM   3719  CG  MET A 475     -45.149  12.086   7.257  1.00  0.59           C  
ATOM   3720  SD  MET A 475     -45.923  11.656   5.677  1.00  0.59           S  
ATOM   3721  CE  MET A 475     -47.568  12.185   6.233  1.00  0.59           C  
ATOM   3722  N   PHE A 476     -40.954  14.396   8.196  1.00  0.69           N  
ATOM   3723  CA  PHE A 476     -39.500  14.472   8.140  1.00  0.69           C  
ATOM   3724  C   PHE A 476     -38.987  15.502   9.135  1.00  0.69           C  
ATOM   3725  O   PHE A 476     -39.616  16.521   9.395  1.00  0.69           O  
ATOM   3726  CB  PHE A 476     -39.014  14.835   6.702  1.00  0.69           C  
ATOM   3727  CG  PHE A 476     -38.989  13.575   5.879  1.00  0.69           C  
ATOM   3728  CD1 PHE A 476     -40.179  12.908   5.551  1.00  0.69           C  
ATOM   3729  CD2 PHE A 476     -37.768  12.970   5.549  1.00  0.69           C  
ATOM   3730  CE1 PHE A 476     -40.154  11.596   5.072  1.00  0.69           C  
ATOM   3731  CE2 PHE A 476     -37.732  11.695   4.971  1.00  0.69           C  
ATOM   3732  CZ  PHE A 476     -38.927  10.989   4.787  1.00  0.69           C  
ATOM   3733  N   TYR A 477     -37.828  15.273   9.774  1.00  0.68           N  
ATOM   3734  CA  TYR A 477     -37.242  16.246  10.685  1.00  0.68           C  
ATOM   3735  C   TYR A 477     -35.759  16.337  10.421  1.00  0.68           C  
ATOM   3736  O   TYR A 477     -35.144  15.419   9.908  1.00  0.68           O  
ATOM   3737  CB  TYR A 477     -37.559  15.900  12.171  1.00  0.68           C  
ATOM   3738  CG  TYR A 477     -36.604  16.396  13.224  1.00  0.68           C  
ATOM   3739  CD1 TYR A 477     -36.610  17.700  13.718  1.00  0.68           C  
ATOM   3740  CD2 TYR A 477     -35.637  15.520  13.700  1.00  0.68           C  
ATOM   3741  CE1 TYR A 477     -35.730  18.079  14.739  1.00  0.68           C  
ATOM   3742  CE2 TYR A 477     -34.808  15.854  14.776  1.00  0.68           C  
ATOM   3743  CZ  TYR A 477     -34.858  17.146  15.288  1.00  0.68           C  
ATOM   3744  OH  TYR A 477     -34.080  17.495  16.391  1.00  0.68           O  
ATOM   3745  N   ILE A 478     -35.169  17.484  10.794  1.00  0.71           N  
ATOM   3746  CA  ILE A 478     -33.772  17.806  10.633  1.00  0.71           C  
ATOM   3747  C   ILE A 478     -33.297  18.356  11.973  1.00  0.71           C  
ATOM   3748  O   ILE A 478     -33.813  19.390  12.409  1.00  0.71           O  
ATOM   3749  CB  ILE A 478     -33.566  18.893   9.570  1.00  0.71           C  
ATOM   3750  CG1 ILE A 478     -34.004  18.429   8.158  1.00  0.71           C  
ATOM   3751  CG2 ILE A 478     -32.098  19.373   9.562  1.00  0.71           C  
ATOM   3752  CD1 ILE A 478     -34.255  19.595   7.194  1.00  0.71           C  
ATOM   3753  N   PRO A 479     -32.313  17.751  12.619  1.00  0.73           N  
ATOM   3754  CA  PRO A 479     -31.465  18.415  13.581  1.00  0.73           C  
ATOM   3755  C   PRO A 479     -30.272  18.976  12.837  1.00  0.73           C  
ATOM   3756  O   PRO A 479     -29.575  18.279  12.105  1.00  0.73           O  
ATOM   3757  CB  PRO A 479     -31.053  17.326  14.576  1.00  0.73           C  
ATOM   3758  CG  PRO A 479     -31.226  16.011  13.833  1.00  0.73           C  
ATOM   3759  CD  PRO A 479     -32.134  16.310  12.639  1.00  0.73           C  
ATOM   3760  N   GLN A 480     -30.075  20.288  12.978  1.00  0.61           N  
ATOM   3761  CA  GLN A 480     -29.115  21.081  12.268  1.00  0.61           C  
ATOM   3762  C   GLN A 480     -27.805  21.190  13.032  1.00  0.61           C  
ATOM   3763  O   GLN A 480     -27.760  21.180  14.261  1.00  0.61           O  
ATOM   3764  CB  GLN A 480     -29.726  22.488  12.049  1.00  0.61           C  
ATOM   3765  CG  GLN A 480     -31.115  22.439  11.366  1.00  0.61           C  
ATOM   3766  CD  GLN A 480     -31.775  23.815  11.289  1.00  0.61           C  
ATOM   3767  OE1 GLN A 480     -31.993  24.504  12.284  1.00  0.61           O  
ATOM   3768  NE2 GLN A 480     -32.154  24.222  10.054  1.00  0.61           N  
ATOM   3769  N   ARG A 481     -26.683  21.314  12.297  1.00  0.56           N  
ATOM   3770  CA  ARG A 481     -25.366  21.537  12.867  1.00  0.56           C  
ATOM   3771  C   ARG A 481     -25.265  22.832  13.701  1.00  0.56           C  
ATOM   3772  O   ARG A 481     -24.756  22.758  14.823  1.00  0.56           O  
ATOM   3773  CB  ARG A 481     -24.327  21.459  11.713  1.00  0.56           C  
ATOM   3774  CG  ARG A 481     -22.880  21.839  12.079  1.00  0.56           C  
ATOM   3775  CD  ARG A 481     -21.950  22.013  10.868  1.00  0.56           C  
ATOM   3776  NE  ARG A 481     -22.339  23.277  10.142  1.00  0.56           N  
ATOM   3777  CZ  ARG A 481     -22.018  24.523  10.526  1.00  0.56           C  
ATOM   3778  NH1 ARG A 481     -22.400  25.557   9.778  1.00  0.56           N  
ATOM   3779  NH2 ARG A 481     -21.339  24.767  11.641  1.00  0.56           N  
ATOM   3780  N   PRO A 482     -25.750  24.003  13.273  1.00  0.59           N  
ATOM   3781  CA  PRO A 482     -26.151  25.069  14.177  1.00  0.59           C  
ATOM   3782  C   PRO A 482     -27.676  25.093  14.289  1.00  0.59           C  
ATOM   3783  O   PRO A 482     -28.376  25.169  13.281  1.00  0.59           O  
ATOM   3784  CB  PRO A 482     -25.607  26.316  13.464  1.00  0.59           C  
ATOM   3785  CG  PRO A 482     -25.772  26.010  11.966  1.00  0.59           C  
ATOM   3786  CD  PRO A 482     -25.697  24.478  11.886  1.00  0.59           C  
ATOM   3787  N   TYR A 483     -28.242  25.014  15.506  1.00  0.60           N  
ATOM   3788  CA  TYR A 483     -29.672  25.188  15.701  1.00  0.60           C  
ATOM   3789  C   TYR A 483     -30.141  26.629  15.486  1.00  0.60           C  
ATOM   3790  O   TYR A 483     -29.498  27.585  15.915  1.00  0.60           O  
ATOM   3791  CB  TYR A 483     -30.057  24.740  17.139  1.00  0.60           C  
ATOM   3792  CG  TYR A 483     -31.539  24.729  17.446  1.00  0.60           C  
ATOM   3793  CD1 TYR A 483     -32.466  24.223  16.522  1.00  0.60           C  
ATOM   3794  CD2 TYR A 483     -32.015  25.184  18.691  1.00  0.60           C  
ATOM   3795  CE1 TYR A 483     -33.821  24.127  16.851  1.00  0.60           C  
ATOM   3796  CE2 TYR A 483     -33.379  25.108  19.015  1.00  0.60           C  
ATOM   3797  CZ  TYR A 483     -34.279  24.580  18.087  1.00  0.60           C  
ATOM   3798  OH  TYR A 483     -35.652  24.505  18.376  1.00  0.60           O  
ATOM   3799  N   MET A 484     -31.328  26.809  14.876  1.00  0.65           N  
ATOM   3800  CA  MET A 484     -32.030  28.074  14.905  1.00  0.65           C  
ATOM   3801  C   MET A 484     -33.140  27.990  15.933  1.00  0.65           C  
ATOM   3802  O   MET A 484     -33.977  27.096  15.901  1.00  0.65           O  
ATOM   3803  CB  MET A 484     -32.640  28.426  13.531  1.00  0.65           C  
ATOM   3804  CG  MET A 484     -31.566  28.708  12.464  1.00  0.65           C  
ATOM   3805  SD  MET A 484     -32.248  29.183  10.847  1.00  0.65           S  
ATOM   3806  CE  MET A 484     -32.642  27.486  10.353  1.00  0.65           C  
ATOM   3807  N   SER A 485     -33.166  28.937  16.884  1.00  0.70           N  
ATOM   3808  CA  SER A 485     -34.183  29.013  17.919  1.00  0.70           C  
ATOM   3809  C   SER A 485     -34.868  30.344  17.732  1.00  0.70           C  
ATOM   3810  O   SER A 485     -34.229  31.311  17.326  1.00  0.70           O  
ATOM   3811  CB  SER A 485     -33.576  28.951  19.346  1.00  0.70           C  
ATOM   3812  OG  SER A 485     -34.592  28.854  20.343  1.00  0.70           O  
ATOM   3813  N   VAL A 486     -36.185  30.436  17.973  1.00  0.69           N  
ATOM   3814  CA  VAL A 486     -36.922  31.680  17.829  1.00  0.69           C  
ATOM   3815  C   VAL A 486     -36.973  32.432  19.149  1.00  0.69           C  
ATOM   3816  O   VAL A 486     -36.612  31.922  20.205  1.00  0.69           O  
ATOM   3817  CB  VAL A 486     -38.319  31.494  17.245  1.00  0.69           C  
ATOM   3818  CG1 VAL A 486     -38.183  30.930  15.818  1.00  0.69           C  
ATOM   3819  CG2 VAL A 486     -39.169  30.562  18.126  1.00  0.69           C  
ATOM   3820  N   GLY A 487     -37.395  33.717  19.119  1.00  0.68           N  
ATOM   3821  CA  GLY A 487     -37.480  34.545  20.323  1.00  0.68           C  
ATOM   3822  C   GLY A 487     -38.752  34.306  21.067  1.00  0.68           C  
ATOM   3823  O   GLY A 487     -39.736  35.012  20.867  1.00  0.68           O  
ATOM   3824  N   SER A 488     -38.754  33.286  21.928  1.00  0.65           N  
ATOM   3825  CA  SER A 488     -39.927  32.860  22.651  1.00  0.65           C  
ATOM   3826  C   SER A 488     -39.470  32.085  23.869  1.00  0.65           C  
ATOM   3827  O   SER A 488     -38.281  31.821  24.058  1.00  0.65           O  
ATOM   3828  CB  SER A 488     -40.921  32.030  21.780  1.00  0.65           C  
ATOM   3829  OG  SER A 488     -40.379  30.782  21.346  1.00  0.65           O  
ATOM   3830  N   LEU A 489     -40.407  31.736  24.771  1.00  0.62           N  
ATOM   3831  CA  LEU A 489     -40.141  30.932  25.951  1.00  0.62           C  
ATOM   3832  C   LEU A 489     -39.641  29.543  25.567  1.00  0.62           C  
ATOM   3833  O   LEU A 489     -39.992  29.021  24.517  1.00  0.62           O  
ATOM   3834  CB  LEU A 489     -41.408  30.773  26.832  1.00  0.62           C  
ATOM   3835  CG  LEU A 489     -41.840  31.999  27.675  1.00  0.62           C  
ATOM   3836  CD1 LEU A 489     -41.972  33.332  26.922  1.00  0.62           C  
ATOM   3837  CD2 LEU A 489     -43.170  31.688  28.378  1.00  0.62           C  
ATOM   3838  N   ARG A 490     -38.816  28.873  26.394  1.00  0.62           N  
ATOM   3839  CA  ARG A 490     -38.320  27.540  26.079  1.00  0.62           C  
ATOM   3840  C   ARG A 490     -39.412  26.501  25.847  1.00  0.62           C  
ATOM   3841  O   ARG A 490     -39.313  25.741  24.890  1.00  0.62           O  
ATOM   3842  CB  ARG A 490     -37.338  27.016  27.139  1.00  0.62           C  
ATOM   3843  CG  ARG A 490     -36.002  27.775  27.162  1.00  0.62           C  
ATOM   3844  CD  ARG A 490     -35.063  27.239  28.238  1.00  0.62           C  
ATOM   3845  NE  ARG A 490     -33.838  28.083  28.190  1.00  0.62           N  
ATOM   3846  CZ  ARG A 490     -32.892  28.078  29.130  1.00  0.62           C  
ATOM   3847  NH1 ARG A 490     -31.988  29.049  29.137  1.00  0.62           N  
ATOM   3848  NH2 ARG A 490     -32.855  27.167  30.092  1.00  0.62           N  
ATOM   3849  N   ASP A 491     -40.506  26.527  26.639  1.00  0.68           N  
ATOM   3850  CA  ASP A 491     -41.790  25.867  26.401  1.00  0.68           C  
ATOM   3851  C   ASP A 491     -42.251  25.999  24.937  1.00  0.68           C  
ATOM   3852  O   ASP A 491     -42.481  25.032  24.213  1.00  0.68           O  
ATOM   3853  CB  ASP A 491     -42.755  26.535  27.442  1.00  0.68           C  
ATOM   3854  CG  ASP A 491     -44.258  26.447  27.215  1.00  0.68           C  
ATOM   3855  OD1 ASP A 491     -44.940  25.642  27.898  1.00  0.68           O  
ATOM   3856  OD2 ASP A 491     -44.758  27.265  26.400  1.00  0.68           O  
ATOM   3857  N   GLN A 492     -42.238  27.235  24.418  1.00  0.65           N  
ATOM   3858  CA  GLN A 492     -42.665  27.611  23.088  1.00  0.65           C  
ATOM   3859  C   GLN A 492     -41.624  27.286  22.010  1.00  0.65           C  
ATOM   3860  O   GLN A 492     -41.904  27.391  20.820  1.00  0.65           O  
ATOM   3861  CB  GLN A 492     -42.995  29.126  23.089  1.00  0.65           C  
ATOM   3862  CG  GLN A 492     -44.109  29.500  24.100  1.00  0.65           C  
ATOM   3863  CD  GLN A 492     -44.178  30.997  24.407  1.00  0.65           C  
ATOM   3864  OE1 GLN A 492     -43.263  31.775  24.136  1.00  0.65           O  
ATOM   3865  NE2 GLN A 492     -45.286  31.416  25.059  1.00  0.65           N  
ATOM   3866  N   VAL A 493     -40.403  26.857  22.402  1.00  0.71           N  
ATOM   3867  CA  VAL A 493     -39.351  26.354  21.518  1.00  0.71           C  
ATOM   3868  C   VAL A 493     -39.313  24.821  21.557  1.00  0.71           C  
ATOM   3869  O   VAL A 493     -38.663  24.166  20.745  1.00  0.71           O  
ATOM   3870  CB  VAL A 493     -37.983  26.935  21.914  1.00  0.71           C  
ATOM   3871  CG1 VAL A 493     -36.817  26.404  21.051  1.00  0.71           C  
ATOM   3872  CG2 VAL A 493     -38.025  28.466  21.757  1.00  0.71           C  
ATOM   3873  N   ILE A 494     -40.073  24.176  22.466  1.00  0.68           N  
ATOM   3874  CA  ILE A 494     -40.234  22.721  22.492  1.00  0.68           C  
ATOM   3875  C   ILE A 494     -41.584  22.364  21.897  1.00  0.68           C  
ATOM   3876  O   ILE A 494     -41.846  21.233  21.505  1.00  0.68           O  
ATOM   3877  CB  ILE A 494     -40.129  22.201  23.922  1.00  0.68           C  
ATOM   3878  CG1 ILE A 494     -38.767  22.590  24.531  1.00  0.68           C  
ATOM   3879  CG2 ILE A 494     -40.319  20.668  24.015  1.00  0.68           C  
ATOM   3880  CD1 ILE A 494     -38.896  22.795  26.037  1.00  0.68           C  
ATOM   3881  N   TYR A 495     -42.477  23.358  21.752  1.00  0.61           N  
ATOM   3882  CA  TYR A 495     -43.713  23.197  21.018  1.00  0.61           C  
ATOM   3883  C   TYR A 495     -43.690  23.282  19.485  1.00  0.61           C  
ATOM   3884  O   TYR A 495     -44.633  22.678  18.986  1.00  0.61           O  
ATOM   3885  CB  TYR A 495     -44.785  24.200  21.541  1.00  0.61           C  
ATOM   3886  CG  TYR A 495     -45.255  23.941  22.957  1.00  0.61           C  
ATOM   3887  CD1 TYR A 495     -45.063  22.732  23.655  1.00  0.61           C  
ATOM   3888  CD2 TYR A 495     -45.880  25.001  23.634  1.00  0.61           C  
ATOM   3889  CE1 TYR A 495     -45.407  22.631  25.009  1.00  0.61           C  
ATOM   3890  CE2 TYR A 495     -46.259  24.885  24.975  1.00  0.61           C  
ATOM   3891  CZ  TYR A 495     -46.020  23.697  25.660  1.00  0.61           C  
ATOM   3892  OH  TYR A 495     -46.359  23.621  27.017  1.00  0.61           O  
ATOM   3893  N   PRO A 496     -42.823  23.880  18.634  1.00  0.64           N  
ATOM   3894  CA  PRO A 496     -43.190  24.334  17.277  1.00  0.64           C  
ATOM   3895  C   PRO A 496     -43.470  23.203  16.287  1.00  0.64           C  
ATOM   3896  O   PRO A 496     -44.036  23.400  15.213  1.00  0.64           O  
ATOM   3897  CB  PRO A 496     -42.012  25.215  16.833  1.00  0.64           C  
ATOM   3898  CG  PRO A 496     -40.839  24.748  17.685  1.00  0.64           C  
ATOM   3899  CD  PRO A 496     -41.500  24.359  19.001  1.00  0.64           C  
ATOM   3900  N   ASP A 497     -43.103  21.991  16.662  1.00  0.60           N  
ATOM   3901  CA  ASP A 497     -43.371  20.716  16.064  1.00  0.60           C  
ATOM   3902  C   ASP A 497     -44.604  20.407  15.220  1.00  0.60           C  
ATOM   3903  O   ASP A 497     -45.772  20.505  15.601  1.00  0.60           O  
ATOM   3904  CB  ASP A 497     -43.305  19.753  17.246  1.00  0.60           C  
ATOM   3905  CG  ASP A 497     -41.842  19.736  17.579  1.00  0.60           C  
ATOM   3906  OD1 ASP A 497     -41.459  20.309  18.617  1.00  0.60           O  
ATOM   3907  OD2 ASP A 497     -41.075  19.265  16.695  1.00  0.60           O  
ATOM   3908  N   SER A 498     -44.318  19.886  14.014  1.00  0.57           N  
ATOM   3909  CA  SER A 498     -45.293  19.725  12.957  1.00  0.57           C  
ATOM   3910  C   SER A 498     -45.979  18.375  12.819  1.00  0.57           C  
ATOM   3911  O   SER A 498     -46.699  18.157  11.854  1.00  0.57           O  
ATOM   3912  CB  SER A 498     -44.647  20.151  11.617  1.00  0.57           C  
ATOM   3913  OG  SER A 498     -43.525  19.360  11.200  1.00  0.57           O  
ATOM   3914  N   VAL A 499     -45.841  17.440  13.786  1.00  0.54           N  
ATOM   3915  CA  VAL A 499     -46.755  16.286  13.883  1.00  0.54           C  
ATOM   3916  C   VAL A 499     -47.722  16.468  15.018  1.00  0.54           C  
ATOM   3917  O   VAL A 499     -48.870  16.047  14.915  1.00  0.54           O  
ATOM   3918  CB  VAL A 499     -46.018  14.965  14.063  1.00  0.54           C  
ATOM   3919  CG1 VAL A 499     -46.756  13.853  14.846  1.00  0.54           C  
ATOM   3920  CG2 VAL A 499     -45.664  14.428  12.679  1.00  0.54           C  
ATOM   3921  N   GLU A 500     -47.336  17.180  16.104  1.00  0.54           N  
ATOM   3922  CA  GLU A 500     -48.318  17.643  17.068  1.00  0.54           C  
ATOM   3923  C   GLU A 500     -49.297  18.583  16.383  1.00  0.54           C  
ATOM   3924  O   GLU A 500     -50.512  18.445  16.516  1.00  0.54           O  
ATOM   3925  CB  GLU A 500     -47.619  18.399  18.223  1.00  0.54           C  
ATOM   3926  CG  GLU A 500     -48.578  19.031  19.265  1.00  0.54           C  
ATOM   3927  CD  GLU A 500     -49.073  18.091  20.356  1.00  0.54           C  
ATOM   3928  OE1 GLU A 500     -49.693  17.048  20.050  1.00  0.54           O  
ATOM   3929  OE2 GLU A 500     -48.868  18.489  21.533  1.00  0.54           O  
ATOM   3930  N   ASP A 501     -48.759  19.552  15.591  1.00  0.56           N  
ATOM   3931  CA  ASP A 501     -49.468  20.360  14.607  1.00  0.56           C  
ATOM   3932  C   ASP A 501     -50.281  21.448  15.298  1.00  0.56           C  
ATOM   3933  O   ASP A 501     -50.140  22.641  15.054  1.00  0.56           O  
ATOM   3934  CB  ASP A 501     -50.274  19.488  13.593  1.00  0.56           C  
ATOM   3935  CG  ASP A 501     -50.826  20.298  12.441  1.00  0.56           C  
ATOM   3936  OD1 ASP A 501     -51.666  21.198  12.709  1.00  0.56           O  
ATOM   3937  OD2 ASP A 501     -50.444  20.059  11.263  1.00  0.56           O  
ATOM   3938  N   MET A 502     -51.105  21.042  16.267  1.00  0.54           N  
ATOM   3939  CA  MET A 502     -52.045  21.831  17.012  1.00  0.54           C  
ATOM   3940  C   MET A 502     -51.399  22.404  18.255  1.00  0.54           C  
ATOM   3941  O   MET A 502     -52.023  23.141  19.018  1.00  0.54           O  
ATOM   3942  CB  MET A 502     -53.231  20.924  17.395  1.00  0.54           C  
ATOM   3943  CG  MET A 502     -54.055  20.477  16.170  1.00  0.54           C  
ATOM   3944  SD  MET A 502     -54.936  21.826  15.315  1.00  0.54           S  
ATOM   3945  CE  MET A 502     -56.122  22.130  16.657  1.00  0.54           C  
ATOM   3946  N   GLN A 503     -50.065  22.202  18.397  1.00  0.59           N  
ATOM   3947  CA  GLN A 503     -49.169  22.888  19.323  1.00  0.59           C  
ATOM   3948  C   GLN A 503     -49.365  24.384  19.274  1.00  0.59           C  
ATOM   3949  O   GLN A 503     -49.390  25.107  20.266  1.00  0.59           O  
ATOM   3950  CB  GLN A 503     -47.688  22.601  18.933  1.00  0.59           C  
ATOM   3951  CG  GLN A 503     -47.190  22.977  17.496  1.00  0.59           C  
ATOM   3952  CD  GLN A 503     -46.641  24.413  17.383  1.00  0.59           C  
ATOM   3953  OE1 GLN A 503     -46.583  25.168  18.354  1.00  0.59           O  
ATOM   3954  NE2 GLN A 503     -46.252  24.815  16.151  1.00  0.59           N  
ATOM   3955  N   ARG A 504     -49.622  24.823  18.039  1.00  0.56           N  
ATOM   3956  CA  ARG A 504     -49.615  26.152  17.540  1.00  0.56           C  
ATOM   3957  C   ARG A 504     -50.834  26.926  17.973  1.00  0.56           C  
ATOM   3958  O   ARG A 504     -50.889  28.147  17.892  1.00  0.56           O  
ATOM   3959  CB  ARG A 504     -49.446  25.954  16.018  1.00  0.56           C  
ATOM   3960  CG  ARG A 504     -50.665  25.658  15.124  1.00  0.56           C  
ATOM   3961  CD  ARG A 504     -50.181  25.451  13.674  1.00  0.56           C  
ATOM   3962  NE  ARG A 504     -51.055  24.451  12.983  1.00  0.56           N  
ATOM   3963  CZ  ARG A 504     -51.095  24.299  11.653  1.00  0.56           C  
ATOM   3964  NH1 ARG A 504     -51.701  23.237  11.131  1.00  0.56           N  
ATOM   3965  NH2 ARG A 504     -50.480  25.134  10.824  1.00  0.56           N  
ATOM   3966  N   LYS A 505     -51.830  26.193  18.497  1.00  0.61           N  
ATOM   3967  CA  LYS A 505     -53.046  26.724  19.058  1.00  0.61           C  
ATOM   3968  C   LYS A 505     -53.151  26.356  20.532  1.00  0.61           C  
ATOM   3969  O   LYS A 505     -54.203  26.511  21.142  1.00  0.61           O  
ATOM   3970  CB  LYS A 505     -54.246  26.136  18.283  1.00  0.61           C  
ATOM   3971  CG  LYS A 505     -54.254  26.571  16.809  1.00  0.61           C  
ATOM   3972  CD  LYS A 505     -55.316  25.827  15.990  1.00  0.61           C  
ATOM   3973  CE  LYS A 505     -55.285  26.194  14.504  1.00  0.61           C  
ATOM   3974  NZ  LYS A 505     -56.263  25.374  13.755  1.00  0.61           N  
ATOM   3975  N   GLY A 506     -52.053  25.866  21.155  1.00  0.65           N  
ATOM   3976  CA  GLY A 506     -52.039  25.557  22.583  1.00  0.65           C  
ATOM   3977  C   GLY A 506     -52.543  24.191  22.975  1.00  0.65           C  
ATOM   3978  O   GLY A 506     -52.957  23.997  24.109  1.00  0.65           O  
ATOM   3979  N   TYR A 507     -52.534  23.199  22.060  1.00  0.55           N  
ATOM   3980  CA  TYR A 507     -52.917  21.825  22.375  1.00  0.55           C  
ATOM   3981  C   TYR A 507     -51.996  21.128  23.380  1.00  0.55           C  
ATOM   3982  O   TYR A 507     -52.453  20.405  24.260  1.00  0.55           O  
ATOM   3983  CB  TYR A 507     -52.973  21.015  21.053  1.00  0.55           C  
ATOM   3984  CG  TYR A 507     -53.540  19.631  21.198  1.00  0.55           C  
ATOM   3985  CD1 TYR A 507     -54.926  19.429  21.298  1.00  0.55           C  
ATOM   3986  CD2 TYR A 507     -52.685  18.519  21.215  1.00  0.55           C  
ATOM   3987  CE1 TYR A 507     -55.446  18.130  21.415  1.00  0.55           C  
ATOM   3988  CE2 TYR A 507     -53.200  17.222  21.330  1.00  0.55           C  
ATOM   3989  CZ  TYR A 507     -54.582  17.030  21.432  1.00  0.55           C  
ATOM   3990  OH  TYR A 507     -55.099  15.727  21.559  1.00  0.55           O  
ATOM   3991  N   SER A 508     -50.667  21.320  23.246  1.00  0.68           N  
ATOM   3992  CA  SER A 508     -49.675  20.682  24.107  1.00  0.68           C  
ATOM   3993  C   SER A 508     -49.770  21.078  25.572  1.00  0.68           C  
ATOM   3994  O   SER A 508     -50.001  22.233  25.923  1.00  0.68           O  
ATOM   3995  CB  SER A 508     -48.217  20.922  23.639  1.00  0.68           C  
ATOM   3996  OG  SER A 508     -47.291  20.058  24.308  1.00  0.68           O  
ATOM   3997  N   GLU A 509     -49.568  20.100  26.467  1.00  0.67           N  
ATOM   3998  CA  GLU A 509     -49.603  20.287  27.896  1.00  0.67           C  
ATOM   3999  C   GLU A 509     -48.187  20.420  28.437  1.00  0.67           C  
ATOM   4000  O   GLU A 509     -47.222  19.932  27.852  1.00  0.67           O  
ATOM   4001  CB  GLU A 509     -50.281  19.068  28.567  1.00  0.67           C  
ATOM   4002  CG  GLU A 509     -51.717  18.790  28.054  1.00  0.67           C  
ATOM   4003  CD  GLU A 509     -52.269  17.483  28.620  1.00  0.67           C  
ATOM   4004  OE1 GLU A 509     -51.595  16.437  28.428  1.00  0.67           O  
ATOM   4005  OE2 GLU A 509     -53.365  17.523  29.236  1.00  0.67           O  
ATOM   4006  N   GLN A 510     -48.016  21.044  29.623  1.00  0.68           N  
ATOM   4007  CA  GLN A 510     -46.721  21.158  30.287  1.00  0.68           C  
ATOM   4008  C   GLN A 510     -46.107  19.800  30.614  1.00  0.68           C  
ATOM   4009  O   GLN A 510     -44.907  19.587  30.471  1.00  0.68           O  
ATOM   4010  CB  GLN A 510     -46.821  22.014  31.573  1.00  0.68           C  
ATOM   4011  CG  GLN A 510     -47.156  23.496  31.282  1.00  0.68           C  
ATOM   4012  CD  GLN A 510     -47.357  24.297  32.569  1.00  0.68           C  
ATOM   4013  OE1 GLN A 510     -48.496  24.552  32.968  1.00  0.68           O  
ATOM   4014  NE2 GLN A 510     -46.259  24.708  33.242  1.00  0.68           N  
ATOM   4015  N   ASP A 511     -46.931  18.810  31.001  1.00  0.75           N  
ATOM   4016  CA  ASP A 511     -46.506  17.435  31.181  1.00  0.75           C  
ATOM   4017  C   ASP A 511     -45.955  16.798  29.901  1.00  0.75           C  
ATOM   4018  O   ASP A 511     -44.944  16.099  29.938  1.00  0.75           O  
ATOM   4019  CB  ASP A 511     -47.656  16.587  31.776  1.00  0.75           C  
ATOM   4020  CG  ASP A 511     -47.942  16.981  33.220  1.00  0.75           C  
ATOM   4021  OD1 ASP A 511     -47.294  17.928  33.736  1.00  0.75           O  
ATOM   4022  OD2 ASP A 511     -48.813  16.314  33.827  1.00  0.75           O  
ATOM   4023  N   LEU A 512     -46.550  17.070  28.715  1.00  0.70           N  
ATOM   4024  CA  LEU A 512     -45.984  16.658  27.435  1.00  0.70           C  
ATOM   4025  C   LEU A 512     -44.610  17.266  27.184  1.00  0.70           C  
ATOM   4026  O   LEU A 512     -43.685  16.562  26.794  1.00  0.70           O  
ATOM   4027  CB  LEU A 512     -46.911  16.970  26.230  1.00  0.70           C  
ATOM   4028  CG  LEU A 512     -48.219  16.151  26.179  1.00  0.70           C  
ATOM   4029  CD1 LEU A 512     -49.098  16.624  25.011  1.00  0.70           C  
ATOM   4030  CD2 LEU A 512     -47.960  14.642  26.037  1.00  0.70           C  
ATOM   4031  N   GLU A 513     -44.404  18.564  27.482  1.00  0.70           N  
ATOM   4032  CA  GLU A 513     -43.076  19.166  27.441  1.00  0.70           C  
ATOM   4033  C   GLU A 513     -42.078  18.504  28.397  1.00  0.70           C  
ATOM   4034  O   GLU A 513     -40.994  18.061  28.012  1.00  0.70           O  
ATOM   4035  CB  GLU A 513     -43.193  20.671  27.782  1.00  0.70           C  
ATOM   4036  CG  GLU A 513     -41.909  21.474  27.477  1.00  0.70           C  
ATOM   4037  CD  GLU A 513     -41.288  22.170  28.684  1.00  0.70           C  
ATOM   4038  OE1 GLU A 513     -41.124  21.537  29.760  1.00  0.70           O  
ATOM   4039  OE2 GLU A 513     -40.902  23.357  28.506  1.00  0.70           O  
ATOM   4040  N   ALA A 514     -42.494  18.305  29.660  1.00  0.76           N  
ATOM   4041  CA  ALA A 514     -41.700  17.731  30.718  1.00  0.76           C  
ATOM   4042  C   ALA A 514     -41.214  16.301  30.481  1.00  0.76           C  
ATOM   4043  O   ALA A 514     -40.081  15.963  30.822  1.00  0.76           O  
ATOM   4044  CB  ALA A 514     -42.513  17.811  32.021  1.00  0.76           C  
ATOM   4045  N   ILE A 515     -42.045  15.421  29.872  1.00  0.71           N  
ATOM   4046  CA  ILE A 515     -41.657  14.058  29.501  1.00  0.71           C  
ATOM   4047  C   ILE A 515     -40.478  14.070  28.531  1.00  0.71           C  
ATOM   4048  O   ILE A 515     -39.482  13.364  28.689  1.00  0.71           O  
ATOM   4049  CB  ILE A 515     -42.841  13.315  28.852  1.00  0.71           C  
ATOM   4050  CG1 ILE A 515     -43.970  13.041  29.875  1.00  0.71           C  
ATOM   4051  CG2 ILE A 515     -42.399  11.982  28.197  1.00  0.71           C  
ATOM   4052  CD1 ILE A 515     -45.327  12.749  29.215  1.00  0.71           C  
ATOM   4053  N   LEU A 516     -40.560  14.930  27.507  1.00  0.72           N  
ATOM   4054  CA  LEU A 516     -39.587  15.079  26.446  1.00  0.72           C  
ATOM   4055  C   LEU A 516     -38.288  15.692  26.920  1.00  0.72           C  
ATOM   4056  O   LEU A 516     -37.199  15.294  26.501  1.00  0.72           O  
ATOM   4057  CB  LEU A 516     -40.209  15.935  25.338  1.00  0.72           C  
ATOM   4058  CG  LEU A 516     -41.156  15.163  24.401  1.00  0.72           C  
ATOM   4059  CD1 LEU A 516     -42.189  14.216  25.032  1.00  0.72           C  
ATOM   4060  CD2 LEU A 516     -41.882  16.187  23.553  1.00  0.72           C  
ATOM   4061  N   ASP A 517     -38.371  16.654  27.854  1.00  0.72           N  
ATOM   4062  CA  ASP A 517     -37.232  17.228  28.531  1.00  0.72           C  
ATOM   4063  C   ASP A 517     -36.365  16.196  29.237  1.00  0.72           C  
ATOM   4064  O   ASP A 517     -35.140  16.258  29.166  1.00  0.72           O  
ATOM   4065  CB  ASP A 517     -37.735  18.301  29.528  1.00  0.72           C  
ATOM   4066  CG  ASP A 517     -37.346  19.646  28.981  1.00  0.72           C  
ATOM   4067  OD1 ASP A 517     -38.057  20.172  28.103  1.00  0.72           O  
ATOM   4068  OD2 ASP A 517     -36.232  20.121  29.318  1.00  0.72           O  
ATOM   4069  N   VAL A 518     -36.988  15.199  29.895  1.00  0.71           N  
ATOM   4070  CA  VAL A 518     -36.296  14.071  30.504  1.00  0.71           C  
ATOM   4071  C   VAL A 518     -35.598  13.166  29.496  1.00  0.71           C  
ATOM   4072  O   VAL A 518     -34.446  12.789  29.695  1.00  0.71           O  
ATOM   4073  CB  VAL A 518     -37.244  13.267  31.391  1.00  0.71           C  
ATOM   4074  CG1 VAL A 518     -36.557  12.014  31.974  1.00  0.71           C  
ATOM   4075  CG2 VAL A 518     -37.717  14.173  32.545  1.00  0.71           C  
ATOM   4076  N   VAL A 519     -36.249  12.819  28.359  1.00  0.74           N  
ATOM   4077  CA  VAL A 519     -35.657  11.967  27.320  1.00  0.74           C  
ATOM   4078  C   VAL A 519     -34.413  12.587  26.707  1.00  0.74           C  
ATOM   4079  O   VAL A 519     -33.389  11.936  26.518  1.00  0.74           O  
ATOM   4080  CB  VAL A 519     -36.646  11.644  26.193  1.00  0.74           C  
ATOM   4081  CG1 VAL A 519     -35.996  10.754  25.109  1.00  0.74           C  
ATOM   4082  CG2 VAL A 519     -37.864  10.908  26.777  1.00  0.74           C  
ATOM   4083  N   HIS A 520     -34.466  13.899  26.422  1.00  0.75           N  
ATOM   4084  CA  HIS A 520     -33.375  14.585  25.754  1.00  0.75           C  
ATOM   4085  C   HIS A 520     -32.466  15.314  26.706  1.00  0.75           C  
ATOM   4086  O   HIS A 520     -31.594  16.066  26.285  1.00  0.75           O  
ATOM   4087  CB  HIS A 520     -33.936  15.570  24.725  1.00  0.75           C  
ATOM   4088  CG  HIS A 520     -34.667  14.785  23.701  1.00  0.75           C  
ATOM   4089  ND1 HIS A 520     -33.922  14.018  22.836  1.00  0.75           N  
ATOM   4090  CD2 HIS A 520     -35.984  14.484  23.590  1.00  0.75           C  
ATOM   4091  CE1 HIS A 520     -34.793  13.260  22.207  1.00  0.75           C  
ATOM   4092  NE2 HIS A 520     -36.057  13.503  22.628  1.00  0.75           N  
ATOM   4093  N   LEU A 521     -32.659  15.099  28.020  1.00  0.71           N  
ATOM   4094  CA  LEU A 521     -31.730  15.436  29.081  1.00  0.71           C  
ATOM   4095  C   LEU A 521     -31.526  16.931  29.332  1.00  0.71           C  
ATOM   4096  O   LEU A 521     -30.649  17.335  30.093  1.00  0.71           O  
ATOM   4097  CB  LEU A 521     -30.375  14.701  28.894  1.00  0.71           C  
ATOM   4098  CG  LEU A 521     -30.477  13.163  28.748  1.00  0.71           C  
ATOM   4099  CD1 LEU A 521     -29.141  12.561  28.284  1.00  0.71           C  
ATOM   4100  CD2 LEU A 521     -30.944  12.474  30.038  1.00  0.71           C  
ATOM   4101  N   HIS A 522     -32.388  17.804  28.762  1.00  0.67           N  
ATOM   4102  CA  HIS A 522     -32.336  19.239  29.013  1.00  0.67           C  
ATOM   4103  C   HIS A 522     -33.026  19.564  30.324  1.00  0.67           C  
ATOM   4104  O   HIS A 522     -32.803  20.611  30.905  1.00  0.67           O  
ATOM   4105  CB  HIS A 522     -32.973  20.075  27.859  1.00  0.67           C  
ATOM   4106  CG  HIS A 522     -32.575  21.538  27.692  1.00  0.67           C  
ATOM   4107  ND1 HIS A 522     -32.600  22.419  28.753  1.00  0.67           N  
ATOM   4108  CD2 HIS A 522     -32.294  22.230  26.553  1.00  0.67           C  
ATOM   4109  CE1 HIS A 522     -32.335  23.604  28.256  1.00  0.67           C  
ATOM   4110  NE2 HIS A 522     -32.138  23.549  26.922  1.00  0.67           N  
ATOM   4111  N   HIS A 523     -33.825  18.653  30.916  1.00  0.61           N  
ATOM   4112  CA  HIS A 523     -34.620  18.935  32.109  1.00  0.61           C  
ATOM   4113  C   HIS A 523     -33.839  19.482  33.300  1.00  0.61           C  
ATOM   4114  O   HIS A 523     -34.333  20.306  34.070  1.00  0.61           O  
ATOM   4115  CB  HIS A 523     -35.399  17.681  32.579  1.00  0.61           C  
ATOM   4116  CG  HIS A 523     -34.575  16.539  33.094  1.00  0.61           C  
ATOM   4117  ND1 HIS A 523     -33.634  15.946  32.280  1.00  0.61           N  
ATOM   4118  CD2 HIS A 523     -34.653  15.878  34.277  1.00  0.61           C  
ATOM   4119  CE1 HIS A 523     -33.158  14.935  32.974  1.00  0.61           C  
ATOM   4120  NE2 HIS A 523     -33.741  14.849  34.194  1.00  0.61           N  
ATOM   4121  N   ILE A 524     -32.580  19.035  33.443  1.00  0.53           N  
ATOM   4122  CA  ILE A 524     -31.581  19.532  34.375  1.00  0.53           C  
ATOM   4123  C   ILE A 524     -31.210  21.000  34.134  1.00  0.53           C  
ATOM   4124  O   ILE A 524     -31.120  21.792  35.069  1.00  0.53           O  
ATOM   4125  CB  ILE A 524     -30.335  18.643  34.288  1.00  0.53           C  
ATOM   4126  CG1 ILE A 524     -30.691  17.167  34.613  1.00  0.53           C  
ATOM   4127  CG2 ILE A 524     -29.218  19.165  35.223  1.00  0.53           C  
ATOM   4128  CD1 ILE A 524     -29.582  16.175  34.240  1.00  0.53           C  
ATOM   4129  N   LEU A 525     -31.014  21.414  32.865  1.00  0.55           N  
ATOM   4130  CA  LEU A 525     -30.565  22.749  32.503  1.00  0.55           C  
ATOM   4131  C   LEU A 525     -31.693  23.652  32.020  1.00  0.55           C  
ATOM   4132  O   LEU A 525     -31.503  24.847  31.815  1.00  0.55           O  
ATOM   4133  CB  LEU A 525     -29.518  22.675  31.362  1.00  0.55           C  
ATOM   4134  CG  LEU A 525     -28.182  22.002  31.737  1.00  0.55           C  
ATOM   4135  CD1 LEU A 525     -27.277  21.892  30.500  1.00  0.55           C  
ATOM   4136  CD2 LEU A 525     -27.447  22.759  32.855  1.00  0.55           C  
ATOM   4137  N   GLN A 526     -32.920  23.136  31.839  1.00  0.56           N  
ATOM   4138  CA  GLN A 526     -34.105  23.940  31.639  1.00  0.56           C  
ATOM   4139  C   GLN A 526     -34.501  24.670  32.900  1.00  0.56           C  
ATOM   4140  O   GLN A 526     -34.875  25.841  32.871  1.00  0.56           O  
ATOM   4141  CB  GLN A 526     -35.307  23.103  31.141  1.00  0.56           C  
ATOM   4142  CG  GLN A 526     -36.608  23.939  31.018  1.00  0.56           C  
ATOM   4143  CD  GLN A 526     -37.290  23.773  29.667  1.00  0.56           C  
ATOM   4144  OE1 GLN A 526     -36.777  24.299  28.671  1.00  0.56           O  
ATOM   4145  NE2 GLN A 526     -38.432  23.067  29.630  1.00  0.56           N  
ATOM   4146  N   ARG A 527     -34.413  23.979  34.051  1.00  0.47           N  
ATOM   4147  CA  ARG A 527     -34.933  24.425  35.329  1.00  0.47           C  
ATOM   4148  C   ARG A 527     -34.037  25.443  36.037  1.00  0.47           C  
ATOM   4149  O   ARG A 527     -33.646  25.302  37.193  1.00  0.47           O  
ATOM   4150  CB  ARG A 527     -35.317  23.186  36.179  1.00  0.47           C  
ATOM   4151  CG  ARG A 527     -36.489  22.418  35.516  1.00  0.47           C  
ATOM   4152  CD  ARG A 527     -36.882  21.095  36.178  1.00  0.47           C  
ATOM   4153  NE  ARG A 527     -38.075  20.593  35.407  1.00  0.47           N  
ATOM   4154  CZ  ARG A 527     -38.692  19.422  35.609  1.00  0.47           C  
ATOM   4155  NH1 ARG A 527     -39.745  19.098  34.860  1.00  0.47           N  
ATOM   4156  NH2 ARG A 527     -38.280  18.573  36.546  1.00  0.47           N  
ATOM   4157  N   GLU A 528     -33.762  26.537  35.302  1.00  0.48           N  
ATOM   4158  CA  GLU A 528     -33.123  27.776  35.682  1.00  0.48           C  
ATOM   4159  C   GLU A 528     -34.151  28.684  36.334  1.00  0.48           C  
ATOM   4160  O   GLU A 528     -35.307  28.316  36.508  1.00  0.48           O  
ATOM   4161  CB  GLU A 528     -32.573  28.502  34.422  1.00  0.48           C  
ATOM   4162  CG  GLU A 528     -31.488  27.707  33.656  1.00  0.48           C  
ATOM   4163  CD  GLU A 528     -31.143  28.302  32.299  1.00  0.48           C  
ATOM   4164  OE1 GLU A 528     -31.614  29.400  31.919  1.00  0.48           O  
ATOM   4165  OE2 GLU A 528     -30.467  27.592  31.506  1.00  0.48           O  
ATOM   4166  N   GLY A 529     -33.777  29.929  36.703  1.00  0.50           N  
ATOM   4167  CA  GLY A 529     -34.670  30.855  37.408  1.00  0.50           C  
ATOM   4168  C   GLY A 529     -35.936  31.267  36.684  1.00  0.50           C  
ATOM   4169  O   GLY A 529     -36.867  31.771  37.299  1.00  0.50           O  
ATOM   4170  N   GLY A 530     -35.996  31.076  35.351  1.00  0.53           N  
ATOM   4171  CA  GLY A 530     -37.218  31.232  34.567  1.00  0.53           C  
ATOM   4172  C   GLY A 530     -37.889  29.930  34.206  1.00  0.53           C  
ATOM   4173  O   GLY A 530     -38.951  29.942  33.594  1.00  0.53           O  
ATOM   4174  N   TRP A 531     -37.300  28.769  34.563  1.00  0.35           N  
ATOM   4175  CA  TRP A 531     -37.725  27.431  34.157  1.00  0.35           C  
ATOM   4176  C   TRP A 531     -38.063  27.268  32.670  1.00  0.35           C  
ATOM   4177  O   TRP A 531     -37.329  27.729  31.792  1.00  0.35           O  
ATOM   4178  CB  TRP A 531     -38.843  26.881  35.081  1.00  0.35           C  
ATOM   4179  CG  TRP A 531     -38.492  26.875  36.553  1.00  0.35           C  
ATOM   4180  CD1 TRP A 531     -37.865  25.897  37.271  1.00  0.35           C  
ATOM   4181  CD2 TRP A 531     -38.756  27.949  37.471  1.00  0.35           C  
ATOM   4182  NE1 TRP A 531     -37.685  26.300  38.575  1.00  0.35           N  
ATOM   4183  CE2 TRP A 531     -38.225  27.558  38.719  1.00  0.35           C  
ATOM   4184  CE3 TRP A 531     -39.384  29.180  37.307  1.00  0.35           C  
ATOM   4185  CZ2 TRP A 531     -38.305  28.399  39.820  1.00  0.35           C  
ATOM   4186  CZ3 TRP A 531     -39.457  30.032  38.418  1.00  0.35           C  
ATOM   4187  CH2 TRP A 531     -38.924  29.648  39.658  1.00  0.35           C  
ATOM   4188  N   GLU A 532     -39.200  26.621  32.332  1.00  0.59           N  
ATOM   4189  CA  GLU A 532     -39.695  26.496  30.973  1.00  0.59           C  
ATOM   4190  C   GLU A 532     -40.063  27.836  30.337  1.00  0.59           C  
ATOM   4191  O   GLU A 532     -40.107  27.992  29.117  1.00  0.59           O  
ATOM   4192  CB  GLU A 532     -40.932  25.567  30.951  1.00  0.59           C  
ATOM   4193  CG  GLU A 532     -42.117  26.011  31.852  1.00  0.59           C  
ATOM   4194  CD  GLU A 532     -42.179  25.236  33.164  1.00  0.59           C  
ATOM   4195  OE1 GLU A 532     -41.109  25.151  33.827  1.00  0.59           O  
ATOM   4196  OE2 GLU A 532     -43.284  24.752  33.524  1.00  0.59           O  
ATOM   4197  N   ALA A 533     -40.276  28.873  31.168  1.00  0.63           N  
ATOM   4198  CA  ALA A 533     -40.665  30.194  30.752  1.00  0.63           C  
ATOM   4199  C   ALA A 533     -39.478  31.143  30.596  1.00  0.63           C  
ATOM   4200  O   ALA A 533     -39.642  32.344  30.390  1.00  0.63           O  
ATOM   4201  CB  ALA A 533     -41.675  30.758  31.769  1.00  0.63           C  
ATOM   4202  N   MET A 534     -38.228  30.637  30.651  1.00  0.55           N  
ATOM   4203  CA  MET A 534     -37.068  31.395  30.215  1.00  0.55           C  
ATOM   4204  C   MET A 534     -37.113  31.691  28.715  1.00  0.55           C  
ATOM   4205  O   MET A 534     -37.503  30.830  27.933  1.00  0.55           O  
ATOM   4206  CB  MET A 534     -35.765  30.637  30.569  1.00  0.55           C  
ATOM   4207  CG  MET A 534     -34.498  31.507  30.517  1.00  0.55           C  
ATOM   4208  SD  MET A 534     -34.493  32.825  31.772  1.00  0.55           S  
ATOM   4209  CE  MET A 534     -33.628  31.826  33.012  1.00  0.55           C  
ATOM   4210  N   CYS A 535     -36.727  32.905  28.269  1.00  0.67           N  
ATOM   4211  CA  CYS A 535     -36.791  33.288  26.864  1.00  0.67           C  
ATOM   4212  C   CYS A 535     -35.407  33.218  26.236  1.00  0.67           C  
ATOM   4213  O   CYS A 535     -34.511  33.980  26.592  1.00  0.67           O  
ATOM   4214  CB  CYS A 535     -37.380  34.720  26.712  1.00  0.67           C  
ATOM   4215  SG  CYS A 535     -37.768  35.201  24.990  1.00  0.67           S  
ATOM   4216  N   ASP A 536     -35.195  32.286  25.286  1.00  0.64           N  
ATOM   4217  CA  ASP A 536     -33.930  32.129  24.588  1.00  0.64           C  
ATOM   4218  C   ASP A 536     -33.898  33.014  23.322  1.00  0.64           C  
ATOM   4219  O   ASP A 536     -34.867  33.683  22.968  1.00  0.64           O  
ATOM   4220  CB  ASP A 536     -33.632  30.629  24.246  1.00  0.64           C  
ATOM   4221  CG  ASP A 536     -33.115  29.781  25.411  1.00  0.64           C  
ATOM   4222  OD1 ASP A 536     -33.213  30.166  26.604  1.00  0.64           O  
ATOM   4223  OD2 ASP A 536     -32.588  28.673  25.113  1.00  0.64           O  
ATOM   4224  N   TRP A 537     -32.732  33.068  22.631  1.00  0.52           N  
ATOM   4225  CA  TRP A 537     -32.501  33.685  21.319  1.00  0.52           C  
ATOM   4226  C   TRP A 537     -32.242  35.183  21.355  1.00  0.52           C  
ATOM   4227  O   TRP A 537     -31.339  35.669  20.675  1.00  0.52           O  
ATOM   4228  CB  TRP A 537     -33.582  33.328  20.246  1.00  0.52           C  
ATOM   4229  CG  TRP A 537     -33.487  33.982  18.865  1.00  0.52           C  
ATOM   4230  CD1 TRP A 537     -34.363  34.865  18.294  1.00  0.52           C  
ATOM   4231  CD2 TRP A 537     -32.476  33.723  17.881  1.00  0.52           C  
ATOM   4232  NE1 TRP A 537     -33.975  35.169  17.006  1.00  0.52           N  
ATOM   4233  CE2 TRP A 537     -32.812  34.487  16.735  1.00  0.52           C  
ATOM   4234  CE3 TRP A 537     -31.358  32.895  17.886  1.00  0.52           C  
ATOM   4235  CZ2 TRP A 537     -32.023  34.447  15.599  1.00  0.52           C  
ATOM   4236  CZ3 TRP A 537     -30.579  32.832  16.722  1.00  0.52           C  
ATOM   4237  CH2 TRP A 537     -30.904  33.603  15.595  1.00  0.52           C  
ATOM   4238  N   LYS A 538     -33.016  35.954  22.135  1.00  0.57           N  
ATOM   4239  CA  LYS A 538     -32.752  37.370  22.331  1.00  0.57           C  
ATOM   4240  C   LYS A 538     -32.274  37.590  23.748  1.00  0.57           C  
ATOM   4241  O   LYS A 538     -31.102  37.874  23.979  1.00  0.57           O  
ATOM   4242  CB  LYS A 538     -33.978  38.268  22.008  1.00  0.57           C  
ATOM   4243  CG  LYS A 538     -34.494  38.167  20.558  1.00  0.57           C  
ATOM   4244  CD  LYS A 538     -33.411  38.334  19.472  1.00  0.57           C  
ATOM   4245  CE  LYS A 538     -34.009  38.430  18.067  1.00  0.57           C  
ATOM   4246  NZ  LYS A 538     -33.069  37.971  17.017  1.00  0.57           N  
ATOM   4247  N   ASP A 539     -33.184  37.463  24.725  1.00  0.58           N  
ATOM   4248  CA  ASP A 539     -32.974  37.723  26.130  1.00  0.58           C  
ATOM   4249  C   ASP A 539     -31.913  36.835  26.785  1.00  0.58           C  
ATOM   4250  O   ASP A 539     -31.056  37.309  27.530  1.00  0.58           O  
ATOM   4251  CB  ASP A 539     -34.332  37.555  26.866  1.00  0.58           C  
ATOM   4252  CG  ASP A 539     -35.457  38.264  26.123  1.00  0.58           C  
ATOM   4253  OD1 ASP A 539     -35.928  39.312  26.620  1.00  0.58           O  
ATOM   4254  OD2 ASP A 539     -35.853  37.747  25.040  1.00  0.58           O  
ATOM   4255  N   VAL A 540     -31.931  35.515  26.500  1.00  0.64           N  
ATOM   4256  CA  VAL A 540     -30.951  34.576  27.025  1.00  0.64           C  
ATOM   4257  C   VAL A 540     -30.205  33.876  25.902  1.00  0.64           C  
ATOM   4258  O   VAL A 540     -30.771  33.277  24.985  1.00  0.64           O  
ATOM   4259  CB  VAL A 540     -31.572  33.549  27.970  1.00  0.64           C  
ATOM   4260  CG1 VAL A 540     -30.524  32.560  28.522  1.00  0.64           C  
ATOM   4261  CG2 VAL A 540     -32.225  34.310  29.138  1.00  0.64           C  
ATOM   4262  N   LEU A 541     -28.858  33.922  25.961  1.00  0.57           N  
ATOM   4263  CA  LEU A 541     -28.006  33.132  25.099  1.00  0.57           C  
ATOM   4264  C   LEU A 541     -27.846  31.727  25.654  1.00  0.57           C  
ATOM   4265  O   LEU A 541     -27.723  31.497  26.855  1.00  0.57           O  
ATOM   4266  CB  LEU A 541     -26.610  33.769  24.905  1.00  0.57           C  
ATOM   4267  CG  LEU A 541     -26.628  35.131  24.180  1.00  0.57           C  
ATOM   4268  CD1 LEU A 541     -25.212  35.722  24.136  1.00  0.57           C  
ATOM   4269  CD2 LEU A 541     -27.195  35.027  22.754  1.00  0.57           C  
ATOM   4270  N   SER A 542     -27.861  30.729  24.761  1.00  0.67           N  
ATOM   4271  CA  SER A 542     -27.930  29.333  25.139  1.00  0.67           C  
ATOM   4272  C   SER A 542     -26.830  28.624  24.392  1.00  0.67           C  
ATOM   4273  O   SER A 542     -26.696  28.801  23.185  1.00  0.67           O  
ATOM   4274  CB  SER A 542     -29.323  28.763  24.777  1.00  0.67           C  
ATOM   4275  OG  SER A 542     -29.645  27.564  25.478  1.00  0.67           O  
ATOM   4276  N   GLY A 543     -25.953  27.872  25.102  1.00  0.72           N  
ATOM   4277  CA  GLY A 543     -24.813  27.168  24.509  1.00  0.72           C  
ATOM   4278  C   GLY A 543     -25.167  26.183  23.425  1.00  0.72           C  
ATOM   4279  O   GLY A 543     -26.280  25.675  23.366  1.00  0.72           O  
ATOM   4280  N   GLY A 544     -24.201  25.843  22.545  1.00  0.69           N  
ATOM   4281  CA  GLY A 544     -24.481  25.056  21.343  1.00  0.69           C  
ATOM   4282  C   GLY A 544     -25.035  23.671  21.566  1.00  0.69           C  
ATOM   4283  O   GLY A 544     -25.795  23.163  20.752  1.00  0.69           O  
ATOM   4284  N   GLU A 545     -24.690  23.008  22.681  1.00  0.68           N  
ATOM   4285  CA  GLU A 545     -25.357  21.779  23.067  1.00  0.68           C  
ATOM   4286  C   GLU A 545     -26.744  21.977  23.650  1.00  0.68           C  
ATOM   4287  O   GLU A 545     -27.668  21.285  23.239  1.00  0.68           O  
ATOM   4288  CB  GLU A 545     -24.484  20.945  23.998  1.00  0.68           C  
ATOM   4289  CG  GLU A 545     -25.103  19.572  24.354  1.00  0.68           C  
ATOM   4290  CD  GLU A 545     -25.799  19.535  25.714  1.00  0.68           C  
ATOM   4291  OE1 GLU A 545     -25.994  20.608  26.339  1.00  0.68           O  
ATOM   4292  OE2 GLU A 545     -26.136  18.396  26.119  1.00  0.68           O  
ATOM   4293  N   LYS A 546     -26.958  22.980  24.532  1.00  0.69           N  
ATOM   4294  CA  LYS A 546     -28.265  23.325  25.079  1.00  0.69           C  
ATOM   4295  C   LYS A 546     -29.268  23.654  23.983  1.00  0.69           C  
ATOM   4296  O   LYS A 546     -30.437  23.274  24.028  1.00  0.69           O  
ATOM   4297  CB  LYS A 546     -28.195  24.543  26.034  1.00  0.69           C  
ATOM   4298  CG  LYS A 546     -27.448  24.267  27.346  1.00  0.69           C  
ATOM   4299  CD  LYS A 546     -27.416  25.489  28.288  1.00  0.69           C  
ATOM   4300  CE  LYS A 546     -28.791  25.910  28.837  1.00  0.69           C  
ATOM   4301  NZ  LYS A 546     -28.635  27.031  29.782  1.00  0.69           N  
ATOM   4302  N   GLN A 547     -28.799  24.345  22.931  1.00  0.67           N  
ATOM   4303  CA  GLN A 547     -29.517  24.503  21.688  1.00  0.67           C  
ATOM   4304  C   GLN A 547     -29.821  23.185  20.970  1.00  0.67           C  
ATOM   4305  O   GLN A 547     -30.962  22.916  20.603  1.00  0.67           O  
ATOM   4306  CB  GLN A 547     -28.662  25.368  20.739  1.00  0.67           C  
ATOM   4307  CG  GLN A 547     -28.519  26.843  21.164  1.00  0.67           C  
ATOM   4308  CD  GLN A 547     -27.635  27.579  20.156  1.00  0.67           C  
ATOM   4309  OE1 GLN A 547     -26.867  26.981  19.403  1.00  0.67           O  
ATOM   4310  NE2 GLN A 547     -27.747  28.926  20.124  1.00  0.67           N  
ATOM   4311  N   ARG A 548     -28.825  22.296  20.782  1.00  0.66           N  
ATOM   4312  CA  ARG A 548     -29.025  21.003  20.149  1.00  0.66           C  
ATOM   4313  C   ARG A 548     -29.880  19.999  20.920  1.00  0.66           C  
ATOM   4314  O   ARG A 548     -30.664  19.271  20.320  1.00  0.66           O  
ATOM   4315  CB  ARG A 548     -27.704  20.321  19.736  1.00  0.66           C  
ATOM   4316  CG  ARG A 548     -26.956  20.995  18.564  1.00  0.66           C  
ATOM   4317  CD  ARG A 548     -25.876  20.106  17.928  1.00  0.66           C  
ATOM   4318  NE  ARG A 548     -25.054  19.511  19.041  1.00  0.66           N  
ATOM   4319  CZ  ARG A 548     -23.963  20.068  19.582  1.00  0.66           C  
ATOM   4320  NH1 ARG A 548     -23.380  19.476  20.623  1.00  0.66           N  
ATOM   4321  NH2 ARG A 548     -23.448  21.196  19.108  1.00  0.66           N  
ATOM   4322  N   ILE A 549     -29.796  19.908  22.261  1.00  0.74           N  
ATOM   4323  CA  ILE A 549     -30.738  19.103  23.033  1.00  0.74           C  
ATOM   4324  C   ILE A 549     -32.098  19.788  23.120  1.00  0.74           C  
ATOM   4325  O   ILE A 549     -33.134  19.143  23.226  1.00  0.74           O  
ATOM   4326  CB  ILE A 549     -30.237  18.679  24.410  1.00  0.74           C  
ATOM   4327  CG1 ILE A 549     -29.992  19.867  25.361  1.00  0.74           C  
ATOM   4328  CG2 ILE A 549     -28.975  17.813  24.223  1.00  0.74           C  
ATOM   4329  CD1 ILE A 549     -29.468  19.461  26.741  1.00  0.74           C  
ATOM   4330  N   GLY A 550     -32.139  21.136  22.972  1.00  0.80           N  
ATOM   4331  CA  GLY A 550     -33.335  21.930  22.701  1.00  0.80           C  
ATOM   4332  C   GLY A 550     -34.079  21.469  21.485  1.00  0.80           C  
ATOM   4333  O   GLY A 550     -35.271  21.186  21.525  1.00  0.80           O  
ATOM   4334  N   MET A 551     -33.333  21.354  20.385  1.00  0.72           N  
ATOM   4335  CA  MET A 551     -33.731  20.792  19.118  1.00  0.72           C  
ATOM   4336  C   MET A 551     -34.112  19.313  19.224  1.00  0.72           C  
ATOM   4337  O   MET A 551     -35.122  18.865  18.700  1.00  0.72           O  
ATOM   4338  CB  MET A 551     -32.522  21.012  18.187  1.00  0.72           C  
ATOM   4339  CG  MET A 551     -32.683  20.719  16.694  1.00  0.72           C  
ATOM   4340  SD  MET A 551     -31.185  21.209  15.795  1.00  0.72           S  
ATOM   4341  CE  MET A 551     -30.062  19.974  16.503  1.00  0.72           C  
ATOM   4342  N   ALA A 552     -33.348  18.494  19.971  1.00  0.79           N  
ATOM   4343  CA  ALA A 552     -33.676  17.100  20.207  1.00  0.79           C  
ATOM   4344  C   ALA A 552     -34.999  16.879  20.950  1.00  0.79           C  
ATOM   4345  O   ALA A 552     -35.773  15.984  20.623  1.00  0.79           O  
ATOM   4346  CB  ALA A 552     -32.513  16.412  20.937  1.00  0.79           C  
ATOM   4347  N   ARG A 553     -35.331  17.749  21.930  1.00  0.69           N  
ATOM   4348  CA  ARG A 553     -36.646  17.788  22.562  1.00  0.69           C  
ATOM   4349  C   ARG A 553     -37.772  18.041  21.593  1.00  0.69           C  
ATOM   4350  O   ARG A 553     -38.812  17.391  21.652  1.00  0.69           O  
ATOM   4351  CB  ARG A 553     -36.757  18.916  23.598  1.00  0.69           C  
ATOM   4352  CG  ARG A 553     -35.959  18.641  24.868  1.00  0.69           C  
ATOM   4353  CD  ARG A 553     -36.154  19.731  25.903  1.00  0.69           C  
ATOM   4354  NE  ARG A 553     -35.492  20.967  25.417  1.00  0.69           N  
ATOM   4355  CZ  ARG A 553     -35.556  22.089  26.143  1.00  0.69           C  
ATOM   4356  NH1 ARG A 553     -35.374  23.269  25.552  1.00  0.69           N  
ATOM   4357  NH2 ARG A 553     -35.871  22.081  27.428  1.00  0.69           N  
ATOM   4358  N   MET A 554     -37.538  18.969  20.649  1.00  0.68           N  
ATOM   4359  CA  MET A 554     -38.419  19.265  19.542  1.00  0.68           C  
ATOM   4360  C   MET A 554     -38.724  17.987  18.728  1.00  0.68           C  
ATOM   4361  O   MET A 554     -39.873  17.623  18.532  1.00  0.68           O  
ATOM   4362  CB  MET A 554     -37.750  20.419  18.738  1.00  0.68           C  
ATOM   4363  CG  MET A 554     -38.680  21.326  17.925  1.00  0.68           C  
ATOM   4364  SD  MET A 554     -37.852  22.650  16.988  1.00  0.68           S  
ATOM   4365  CE  MET A 554     -36.580  21.742  16.066  1.00  0.68           C  
ATOM   4366  N   PHE A 555     -37.720  17.136  18.386  1.00  0.63           N  
ATOM   4367  CA  PHE A 555     -37.926  15.856  17.692  1.00  0.63           C  
ATOM   4368  C   PHE A 555     -38.968  14.918  18.295  1.00  0.63           C  
ATOM   4369  O   PHE A 555     -39.743  14.274  17.592  1.00  0.63           O  
ATOM   4370  CB  PHE A 555     -36.600  15.037  17.635  1.00  0.63           C  
ATOM   4371  CG  PHE A 555     -36.697  13.734  16.870  1.00  0.63           C  
ATOM   4372  CD1 PHE A 555     -37.303  13.670  15.609  1.00  0.63           C  
ATOM   4373  CD2 PHE A 555     -36.263  12.539  17.454  1.00  0.63           C  
ATOM   4374  CE1 PHE A 555     -37.521  12.447  14.968  1.00  0.63           C  
ATOM   4375  CE2 PHE A 555     -36.402  11.325  16.775  1.00  0.63           C  
ATOM   4376  CZ  PHE A 555     -37.065  11.268  15.548  1.00  0.63           C  
ATOM   4377  N   TYR A 556     -39.016  14.807  19.622  1.00  0.61           N  
ATOM   4378  CA  TYR A 556     -39.926  13.882  20.252  1.00  0.61           C  
ATOM   4379  C   TYR A 556     -41.320  14.509  20.391  1.00  0.61           C  
ATOM   4380  O   TYR A 556     -42.304  13.800  20.571  1.00  0.61           O  
ATOM   4381  CB  TYR A 556     -39.218  13.391  21.539  1.00  0.61           C  
ATOM   4382  CG  TYR A 556     -39.728  12.119  22.176  1.00  0.61           C  
ATOM   4383  CD1 TYR A 556     -38.847  11.037  22.364  1.00  0.61           C  
ATOM   4384  CD2 TYR A 556     -41.018  12.019  22.716  1.00  0.61           C  
ATOM   4385  CE1 TYR A 556     -39.241   9.903  23.088  1.00  0.61           C  
ATOM   4386  CE2 TYR A 556     -41.398  10.913  23.486  1.00  0.61           C  
ATOM   4387  CZ  TYR A 556     -40.505   9.858  23.675  1.00  0.61           C  
ATOM   4388  OH  TYR A 556     -40.866   8.768  24.486  1.00  0.61           O  
ATOM   4389  N   HIS A 557     -41.481  15.841  20.181  1.00  0.62           N  
ATOM   4390  CA  HIS A 557     -42.794  16.483  20.225  1.00  0.62           C  
ATOM   4391  C   HIS A 557     -43.457  16.488  18.862  1.00  0.62           C  
ATOM   4392  O   HIS A 557     -44.559  16.981  18.642  1.00  0.62           O  
ATOM   4393  CB  HIS A 557     -42.726  17.937  20.754  1.00  0.62           C  
ATOM   4394  CG  HIS A 557     -44.044  18.382  21.300  1.00  0.62           C  
ATOM   4395  ND1 HIS A 557     -44.612  17.633  22.314  1.00  0.62           N  
ATOM   4396  CD2 HIS A 557     -44.930  19.299  20.837  1.00  0.62           C  
ATOM   4397  CE1 HIS A 557     -45.834  18.098  22.440  1.00  0.62           C  
ATOM   4398  NE2 HIS A 557     -46.078  19.105  21.572  1.00  0.62           N  
ATOM   4399  N   ARG A 558     -42.796  15.856  17.890  1.00  0.55           N  
ATOM   4400  CA  ARG A 558     -43.335  15.643  16.579  1.00  0.55           C  
ATOM   4401  C   ARG A 558     -43.188  14.234  16.031  1.00  0.55           C  
ATOM   4402  O   ARG A 558     -43.024  14.179  14.813  1.00  0.55           O  
ATOM   4403  CB  ARG A 558     -42.542  16.540  15.615  1.00  0.55           C  
ATOM   4404  CG  ARG A 558     -41.026  16.262  15.631  1.00  0.55           C  
ATOM   4405  CD  ARG A 558     -40.203  16.904  14.532  1.00  0.55           C  
ATOM   4406  NE  ARG A 558     -40.718  18.265  14.309  1.00  0.55           N  
ATOM   4407  CZ  ARG A 558     -39.817  19.155  13.915  1.00  0.55           C  
ATOM   4408  NH1 ARG A 558     -39.180  19.824  14.863  1.00  0.55           N  
ATOM   4409  NH2 ARG A 558     -39.775  19.620  12.676  1.00  0.55           N  
ATOM   4410  N   PRO A 559     -43.199  13.119  16.774  1.00  0.54           N  
ATOM   4411  CA  PRO A 559     -42.734  11.789  16.331  1.00  0.54           C  
ATOM   4412  C   PRO A 559     -42.690  11.516  14.828  1.00  0.54           C  
ATOM   4413  O   PRO A 559     -43.698  11.121  14.247  1.00  0.54           O  
ATOM   4414  CB  PRO A 559     -43.642  10.814  17.101  1.00  0.54           C  
ATOM   4415  CG  PRO A 559     -43.967  11.562  18.395  1.00  0.54           C  
ATOM   4416  CD  PRO A 559     -44.122  12.998  17.907  1.00  0.54           C  
ATOM   4417  N   LYS A 560     -41.535  11.751  14.171  1.00  0.57           N  
ATOM   4418  CA  LYS A 560     -41.463  11.695  12.725  1.00  0.57           C  
ATOM   4419  C   LYS A 560     -40.975  10.332  12.324  1.00  0.57           C  
ATOM   4420  O   LYS A 560     -40.076   9.764  12.941  1.00  0.57           O  
ATOM   4421  CB  LYS A 560     -40.502  12.737  12.083  1.00  0.57           C  
ATOM   4422  CG  LYS A 560     -40.869  14.218  12.282  1.00  0.57           C  
ATOM   4423  CD  LYS A 560     -42.159  14.707  11.601  1.00  0.57           C  
ATOM   4424  CE  LYS A 560     -42.512  16.203  11.758  1.00  0.57           C  
ATOM   4425  NZ  LYS A 560     -41.695  17.138  10.957  1.00  0.57           N  
ATOM   4426  N   TYR A 561     -41.535   9.785  11.233  1.00  0.52           N  
ATOM   4427  CA  TYR A 561     -41.123   8.499  10.716  1.00  0.52           C  
ATOM   4428  C   TYR A 561     -39.759   8.572  10.045  1.00  0.52           C  
ATOM   4429  O   TYR A 561     -39.105   7.548   9.858  1.00  0.52           O  
ATOM   4430  CB  TYR A 561     -42.185   7.925   9.745  1.00  0.52           C  
ATOM   4431  CG  TYR A 561     -43.423   7.565  10.520  1.00  0.52           C  
ATOM   4432  CD1 TYR A 561     -44.590   8.344  10.436  1.00  0.52           C  
ATOM   4433  CD2 TYR A 561     -43.420   6.432  11.351  1.00  0.52           C  
ATOM   4434  CE1 TYR A 561     -45.729   8.001  11.180  1.00  0.52           C  
ATOM   4435  CE2 TYR A 561     -44.561   6.082  12.088  1.00  0.52           C  
ATOM   4436  CZ  TYR A 561     -45.714   6.870  12.001  1.00  0.52           C  
ATOM   4437  OH  TYR A 561     -46.868   6.520  12.729  1.00  0.52           O  
ATOM   4438  N   ALA A 562     -39.270   9.793   9.730  1.00  0.73           N  
ATOM   4439  CA  ALA A 562     -37.917  10.004   9.274  1.00  0.73           C  
ATOM   4440  C   ALA A 562     -37.166  11.153   9.954  1.00  0.73           C  
ATOM   4441  O   ALA A 562     -37.695  12.229  10.244  1.00  0.73           O  
ATOM   4442  CB  ALA A 562     -37.940  10.238   7.771  1.00  0.73           C  
ATOM   4443  N   LEU A 563     -35.867  10.917  10.218  1.00  0.74           N  
ATOM   4444  CA  LEU A 563     -34.956  11.783  10.941  1.00  0.74           C  
ATOM   4445  C   LEU A 563     -33.703  12.022  10.097  1.00  0.74           C  
ATOM   4446  O   LEU A 563     -32.935  11.111   9.789  1.00  0.74           O  
ATOM   4447  CB  LEU A 563     -34.652  11.080  12.293  1.00  0.74           C  
ATOM   4448  CG  LEU A 563     -33.419  11.504  13.122  1.00  0.74           C  
ATOM   4449  CD1 LEU A 563     -33.466  12.972  13.498  1.00  0.74           C  
ATOM   4450  CD2 LEU A 563     -33.351  10.751  14.459  1.00  0.74           C  
ATOM   4451  N   LEU A 564     -33.483  13.280   9.666  1.00  0.77           N  
ATOM   4452  CA  LEU A 564     -32.427  13.676   8.753  1.00  0.77           C  
ATOM   4453  C   LEU A 564     -31.307  14.445   9.460  1.00  0.77           C  
ATOM   4454  O   LEU A 564     -31.192  15.664   9.313  1.00  0.77           O  
ATOM   4455  CB  LEU A 564     -32.957  14.597   7.618  1.00  0.77           C  
ATOM   4456  CG  LEU A 564     -34.169  14.108   6.798  1.00  0.77           C  
ATOM   4457  CD1 LEU A 564     -34.522  15.173   5.745  1.00  0.77           C  
ATOM   4458  CD2 LEU A 564     -33.921  12.763   6.108  1.00  0.77           C  
ATOM   4459  N   ASP A 565     -30.469  13.779  10.278  1.00  0.75           N  
ATOM   4460  CA  ASP A 565     -29.391  14.414  11.020  1.00  0.75           C  
ATOM   4461  C   ASP A 565     -28.291  15.126  10.213  1.00  0.75           C  
ATOM   4462  O   ASP A 565     -27.803  14.641   9.191  1.00  0.75           O  
ATOM   4463  CB  ASP A 565     -28.678  13.400  11.944  1.00  0.75           C  
ATOM   4464  CG  ASP A 565     -29.499  12.701  13.011  1.00  0.75           C  
ATOM   4465  OD1 ASP A 565     -29.943  13.343  13.983  1.00  0.75           O  
ATOM   4466  OD2 ASP A 565     -29.464  11.440  12.997  1.00  0.75           O  
ATOM   4467  N   GLU A 566     -27.828  16.286  10.732  1.00  0.67           N  
ATOM   4468  CA  GLU A 566     -26.598  16.938  10.315  1.00  0.67           C  
ATOM   4469  C   GLU A 566     -25.663  17.038  11.513  1.00  0.67           C  
ATOM   4470  O   GLU A 566     -25.940  17.738  12.489  1.00  0.67           O  
ATOM   4471  CB  GLU A 566     -26.856  18.368   9.775  1.00  0.67           C  
ATOM   4472  CG  GLU A 566     -25.618  19.083   9.153  1.00  0.67           C  
ATOM   4473  CD  GLU A 566     -25.267  18.663   7.726  1.00  0.67           C  
ATOM   4474  OE1 GLU A 566     -26.182  18.706   6.864  1.00  0.67           O  
ATOM   4475  OE2 GLU A 566     -24.087  18.330   7.453  1.00  0.67           O  
ATOM   4476  N   CYS A 567     -24.521  16.327  11.490  1.00  0.67           N  
ATOM   4477  CA  CYS A 567     -23.608  16.296  12.623  1.00  0.67           C  
ATOM   4478  C   CYS A 567     -22.555  17.396  12.597  1.00  0.67           C  
ATOM   4479  O   CYS A 567     -22.189  17.972  11.574  1.00  0.67           O  
ATOM   4480  CB  CYS A 567     -22.906  14.921  12.762  1.00  0.67           C  
ATOM   4481  SG  CYS A 567     -24.073  13.618  13.281  1.00  0.67           S  
ATOM   4482  N   THR A 568     -22.011  17.732  13.781  1.00  0.58           N  
ATOM   4483  CA  THR A 568     -20.989  18.755  13.923  1.00  0.58           C  
ATOM   4484  C   THR A 568     -19.600  18.229  13.611  1.00  0.58           C  
ATOM   4485  O   THR A 568     -19.058  17.403  14.339  1.00  0.58           O  
ATOM   4486  CB  THR A 568     -20.958  19.367  15.324  1.00  0.58           C  
ATOM   4487  OG1 THR A 568     -20.898  18.360  16.328  1.00  0.58           O  
ATOM   4488  CG2 THR A 568     -22.245  20.168  15.578  1.00  0.58           C  
ATOM   4489  N   SER A 569     -18.966  18.738  12.526  1.00  0.51           N  
ATOM   4490  CA  SER A 569     -17.560  18.486  12.201  1.00  0.51           C  
ATOM   4491  C   SER A 569     -16.608  18.965  13.278  1.00  0.51           C  
ATOM   4492  O   SER A 569     -15.659  18.282  13.647  1.00  0.51           O  
ATOM   4493  CB  SER A 569     -17.097  19.197  10.897  1.00  0.51           C  
ATOM   4494  OG  SER A 569     -17.964  18.916   9.796  1.00  0.51           O  
ATOM   4495  N   ALA A 570     -16.876  20.163  13.831  1.00  0.52           N  
ATOM   4496  CA  ALA A 570     -16.204  20.661  15.006  1.00  0.52           C  
ATOM   4497  C   ALA A 570     -16.991  20.211  16.229  1.00  0.52           C  
ATOM   4498  O   ALA A 570     -18.039  20.762  16.564  1.00  0.52           O  
ATOM   4499  CB  ALA A 570     -16.105  22.198  14.951  1.00  0.52           C  
ATOM   4500  N   VAL A 571     -16.518  19.133  16.876  1.00  0.57           N  
ATOM   4501  CA  VAL A 571     -17.119  18.519  18.046  1.00  0.57           C  
ATOM   4502  C   VAL A 571     -17.141  19.457  19.255  1.00  0.57           C  
ATOM   4503  O   VAL A 571     -16.204  20.208  19.511  1.00  0.57           O  
ATOM   4504  CB  VAL A 571     -16.419  17.193  18.353  1.00  0.57           C  
ATOM   4505  CG1 VAL A 571     -17.040  16.464  19.561  1.00  0.57           C  
ATOM   4506  CG2 VAL A 571     -16.490  16.278  17.111  1.00  0.57           C  
ATOM   4507  N   SER A 572     -18.246  19.452  20.032  1.00  0.67           N  
ATOM   4508  CA  SER A 572     -18.370  20.245  21.248  1.00  0.67           C  
ATOM   4509  C   SER A 572     -17.825  19.515  22.463  1.00  0.67           C  
ATOM   4510  O   SER A 572     -17.627  18.312  22.429  1.00  0.67           O  
ATOM   4511  CB  SER A 572     -19.835  20.683  21.542  1.00  0.67           C  
ATOM   4512  OG  SER A 572     -20.743  19.581  21.670  1.00  0.67           O  
ATOM   4513  N   ILE A 573     -17.587  20.270  23.560  1.00  0.67           N  
ATOM   4514  CA  ILE A 573     -17.149  19.858  24.896  1.00  0.67           C  
ATOM   4515  C   ILE A 573     -17.617  18.468  25.374  1.00  0.67           C  
ATOM   4516  O   ILE A 573     -18.730  18.025  25.092  1.00  0.67           O  
ATOM   4517  CB  ILE A 573     -17.507  20.960  25.910  1.00  0.67           C  
ATOM   4518  CG1 ILE A 573     -17.054  22.378  25.456  1.00  0.67           C  
ATOM   4519  CG2 ILE A 573     -16.930  20.645  27.311  1.00  0.67           C  
ATOM   4520  CD1 ILE A 573     -17.742  23.503  26.245  1.00  0.67           C  
ATOM   4521  N   ASP A 574     -16.758  17.727  26.109  1.00  0.75           N  
ATOM   4522  CA  ASP A 574     -16.941  16.352  26.533  1.00  0.75           C  
ATOM   4523  C   ASP A 574     -18.224  16.027  27.294  1.00  0.75           C  
ATOM   4524  O   ASP A 574     -18.828  14.973  27.088  1.00  0.75           O  
ATOM   4525  CB  ASP A 574     -15.796  15.953  27.504  1.00  0.75           C  
ATOM   4526  CG  ASP A 574     -14.406  16.002  26.886  1.00  0.75           C  
ATOM   4527  OD1 ASP A 574     -14.170  16.814  25.960  1.00  0.75           O  
ATOM   4528  OD2 ASP A 574     -13.565  15.217  27.396  1.00  0.75           O  
ATOM   4529  N   VAL A 575     -18.656  16.898  28.231  1.00  0.73           N  
ATOM   4530  CA  VAL A 575     -19.854  16.682  29.035  1.00  0.73           C  
ATOM   4531  C   VAL A 575     -21.097  16.740  28.158  1.00  0.73           C  
ATOM   4532  O   VAL A 575     -21.897  15.805  28.105  1.00  0.73           O  
ATOM   4533  CB  VAL A 575     -19.932  17.710  30.165  1.00  0.73           C  
ATOM   4534  CG1 VAL A 575     -21.213  17.527  31.004  1.00  0.73           C  
ATOM   4535  CG2 VAL A 575     -18.681  17.593  31.061  1.00  0.73           C  
ATOM   4536  N   GLU A 576     -21.181  17.808  27.352  1.00  0.69           N  
ATOM   4537  CA  GLU A 576     -22.159  18.084  26.332  1.00  0.69           C  
ATOM   4538  C   GLU A 576     -22.229  17.019  25.248  1.00  0.69           C  
ATOM   4539  O   GLU A 576     -23.296  16.587  24.819  1.00  0.69           O  
ATOM   4540  CB  GLU A 576     -21.747  19.423  25.665  1.00  0.69           C  
ATOM   4541  CG  GLU A 576     -22.003  20.679  26.539  1.00  0.69           C  
ATOM   4542  CD  GLU A 576     -20.834  21.095  27.428  1.00  0.69           C  
ATOM   4543  OE1 GLU A 576     -20.083  20.205  27.904  1.00  0.69           O  
ATOM   4544  OE2 GLU A 576     -20.654  22.330  27.584  1.00  0.69           O  
ATOM   4545  N   GLY A 577     -21.070  16.535  24.760  1.00  0.80           N  
ATOM   4546  CA  GLY A 577     -21.019  15.511  23.723  1.00  0.80           C  
ATOM   4547  C   GLY A 577     -21.608  14.184  24.131  1.00  0.80           C  
ATOM   4548  O   GLY A 577     -22.256  13.516  23.333  1.00  0.80           O  
ATOM   4549  N   LYS A 578     -21.436  13.784  25.404  1.00  0.74           N  
ATOM   4550  CA  LYS A 578     -22.058  12.592  25.957  1.00  0.74           C  
ATOM   4551  C   LYS A 578     -23.567  12.718  26.135  1.00  0.74           C  
ATOM   4552  O   LYS A 578     -24.322  11.806  25.799  1.00  0.74           O  
ATOM   4553  CB  LYS A 578     -21.396  12.225  27.307  1.00  0.74           C  
ATOM   4554  CG  LYS A 578     -19.920  11.828  27.139  1.00  0.74           C  
ATOM   4555  CD  LYS A 578     -19.183  11.668  28.478  1.00  0.74           C  
ATOM   4556  CE  LYS A 578     -17.676  11.484  28.274  1.00  0.74           C  
ATOM   4557  NZ  LYS A 578     -16.981  11.400  29.577  1.00  0.74           N  
ATOM   4558  N   ILE A 579     -24.043  13.868  26.655  1.00  0.73           N  
ATOM   4559  CA  ILE A 579     -25.461  14.152  26.843  1.00  0.73           C  
ATOM   4560  C   ILE A 579     -26.207  14.252  25.517  1.00  0.73           C  
ATOM   4561  O   ILE A 579     -27.247  13.620  25.320  1.00  0.73           O  
ATOM   4562  CB  ILE A 579     -25.636  15.410  27.693  1.00  0.73           C  
ATOM   4563  CG1 ILE A 579     -25.052  15.172  29.110  1.00  0.73           C  
ATOM   4564  CG2 ILE A 579     -27.123  15.813  27.777  1.00  0.73           C  
ATOM   4565  CD1 ILE A 579     -25.036  16.432  29.984  1.00  0.73           C  
ATOM   4566  N   PHE A 580     -25.643  14.981  24.529  1.00  0.74           N  
ATOM   4567  CA  PHE A 580     -26.192  15.066  23.188  1.00  0.74           C  
ATOM   4568  C   PHE A 580     -26.231  13.719  22.474  1.00  0.74           C  
ATOM   4569  O   PHE A 580     -27.217  13.400  21.817  1.00  0.74           O  
ATOM   4570  CB  PHE A 580     -25.431  16.132  22.342  1.00  0.74           C  
ATOM   4571  CG  PHE A 580     -26.051  16.330  20.976  1.00  0.74           C  
ATOM   4572  CD1 PHE A 580     -27.402  16.697  20.855  1.00  0.74           C  
ATOM   4573  CD2 PHE A 580     -25.320  16.053  19.807  1.00  0.74           C  
ATOM   4574  CE1 PHE A 580     -28.026  16.736  19.603  1.00  0.74           C  
ATOM   4575  CE2 PHE A 580     -25.931  16.129  18.547  1.00  0.74           C  
ATOM   4576  CZ  PHE A 580     -27.288  16.463  18.446  1.00  0.74           C  
ATOM   4577  N   GLN A 581     -25.179  12.879  22.602  1.00  0.75           N  
ATOM   4578  CA  GLN A 581     -25.169  11.543  22.023  1.00  0.75           C  
ATOM   4579  C   GLN A 581     -26.302  10.661  22.532  1.00  0.75           C  
ATOM   4580  O   GLN A 581     -27.071  10.120  21.744  1.00  0.75           O  
ATOM   4581  CB  GLN A 581     -23.811  10.859  22.332  1.00  0.75           C  
ATOM   4582  CG  GLN A 581     -23.661   9.404  21.825  1.00  0.75           C  
ATOM   4583  CD  GLN A 581     -23.763   9.319  20.304  1.00  0.75           C  
ATOM   4584  OE1 GLN A 581     -23.210  10.148  19.573  1.00  0.75           O  
ATOM   4585  NE2 GLN A 581     -24.474   8.287  19.804  1.00  0.75           N  
ATOM   4586  N   ALA A 582     -26.491  10.585  23.866  1.00  0.85           N  
ATOM   4587  CA  ALA A 582     -27.534   9.789  24.484  1.00  0.85           C  
ATOM   4588  C   ALA A 582     -28.951  10.230  24.121  1.00  0.85           C  
ATOM   4589  O   ALA A 582     -29.831   9.410  23.859  1.00  0.85           O  
ATOM   4590  CB  ALA A 582     -27.341   9.821  26.012  1.00  0.85           C  
ATOM   4591  N   ALA A 583     -29.193  11.555  24.062  1.00  0.83           N  
ATOM   4592  CA  ALA A 583     -30.428  12.124  23.560  1.00  0.83           C  
ATOM   4593  C   ALA A 583     -30.688  11.791  22.090  1.00  0.83           C  
ATOM   4594  O   ALA A 583     -31.788  11.420  21.687  1.00  0.83           O  
ATOM   4595  CB  ALA A 583     -30.349  13.655  23.731  1.00  0.83           C  
ATOM   4596  N   LYS A 584     -29.642  11.888  21.249  1.00  0.77           N  
ATOM   4597  CA  LYS A 584     -29.686  11.580  19.835  1.00  0.77           C  
ATOM   4598  C   LYS A 584     -29.947  10.107  19.502  1.00  0.77           C  
ATOM   4599  O   LYS A 584     -30.646   9.800  18.536  1.00  0.77           O  
ATOM   4600  CB  LYS A 584     -28.388  12.082  19.162  1.00  0.77           C  
ATOM   4601  CG  LYS A 584     -28.455  12.046  17.635  1.00  0.77           C  
ATOM   4602  CD  LYS A 584     -27.122  12.412  16.965  1.00  0.77           C  
ATOM   4603  CE  LYS A 584     -27.180  12.322  15.439  1.00  0.77           C  
ATOM   4604  NZ  LYS A 584     -27.852  11.069  15.038  1.00  0.77           N  
ATOM   4605  N   ASP A 585     -29.392   9.156  20.282  1.00  0.81           N  
ATOM   4606  CA  ASP A 585     -29.689   7.734  20.181  1.00  0.81           C  
ATOM   4607  C   ASP A 585     -31.163   7.399  20.478  1.00  0.81           C  
ATOM   4608  O   ASP A 585     -31.757   6.486  19.900  1.00  0.81           O  
ATOM   4609  CB  ASP A 585     -28.758   6.919  21.125  1.00  0.81           C  
ATOM   4610  CG  ASP A 585     -27.319   6.931  20.636  1.00  0.81           C  
ATOM   4611  OD1 ASP A 585     -27.109   6.688  19.421  1.00  0.81           O  
ATOM   4612  OD2 ASP A 585     -26.396   7.154  21.462  1.00  0.81           O  
ATOM   4613  N   ALA A 586     -31.800   8.135  21.412  1.00  0.81           N  
ATOM   4614  CA  ALA A 586     -33.154   7.898  21.875  1.00  0.81           C  
ATOM   4615  C   ALA A 586     -34.296   8.295  20.919  1.00  0.81           C  
ATOM   4616  O   ALA A 586     -35.084   9.196  21.181  1.00  0.81           O  
ATOM   4617  CB  ALA A 586     -33.340   8.599  23.238  1.00  0.81           C  
ATOM   4618  N   GLY A 587     -34.459   7.571  19.788  1.00  0.73           N  
ATOM   4619  CA  GLY A 587     -35.605   7.799  18.910  1.00  0.73           C  
ATOM   4620  C   GLY A 587     -35.522   7.091  17.583  1.00  0.73           C  
ATOM   4621  O   GLY A 587     -35.080   7.654  16.589  1.00  0.73           O  
ATOM   4622  N   ILE A 588     -35.967   5.819  17.520  1.00  0.60           N  
ATOM   4623  CA  ILE A 588     -35.967   5.022  16.295  1.00  0.60           C  
ATOM   4624  C   ILE A 588     -36.933   5.541  15.224  1.00  0.60           C  
ATOM   4625  O   ILE A 588     -38.110   5.789  15.477  1.00  0.60           O  
ATOM   4626  CB  ILE A 588     -36.225   3.535  16.570  1.00  0.60           C  
ATOM   4627  CG1 ILE A 588     -35.239   2.996  17.639  1.00  0.60           C  
ATOM   4628  CG2 ILE A 588     -36.106   2.721  15.257  1.00  0.60           C  
ATOM   4629  CD1 ILE A 588     -35.550   1.563  18.092  1.00  0.60           C  
ATOM   4630  N   ALA A 589     -36.433   5.692  13.983  1.00  0.67           N  
ATOM   4631  CA  ALA A 589     -37.153   6.196  12.841  1.00  0.67           C  
ATOM   4632  C   ALA A 589     -36.356   5.734  11.627  1.00  0.67           C  
ATOM   4633  O   ALA A 589     -35.338   5.059  11.777  1.00  0.67           O  
ATOM   4634  CB  ALA A 589     -37.267   7.736  12.901  1.00  0.67           C  
ATOM   4635  N   LEU A 590     -36.773   6.063  10.387  1.00  0.68           N  
ATOM   4636  CA  LEU A 590     -35.871   6.042   9.239  1.00  0.68           C  
ATOM   4637  C   LEU A 590     -34.803   7.121   9.400  1.00  0.68           C  
ATOM   4638  O   LEU A 590     -35.127   8.300   9.532  1.00  0.68           O  
ATOM   4639  CB  LEU A 590     -36.694   6.281   7.946  1.00  0.68           C  
ATOM   4640  CG  LEU A 590     -35.941   6.289   6.593  1.00  0.68           C  
ATOM   4641  CD1 LEU A 590     -35.334   7.650   6.211  1.00  0.68           C  
ATOM   4642  CD2 LEU A 590     -34.899   5.178   6.474  1.00  0.68           C  
ATOM   4643  N   LEU A 591     -33.502   6.764   9.443  1.00  0.73           N  
ATOM   4644  CA  LEU A 591     -32.482   7.742   9.791  1.00  0.73           C  
ATOM   4645  C   LEU A 591     -31.574   8.005   8.604  1.00  0.73           C  
ATOM   4646  O   LEU A 591     -30.986   7.083   8.044  1.00  0.73           O  
ATOM   4647  CB  LEU A 591     -31.579   7.339  10.995  1.00  0.73           C  
ATOM   4648  CG  LEU A 591     -32.257   6.849  12.298  1.00  0.73           C  
ATOM   4649  CD1 LEU A 591     -31.294   6.951  13.496  1.00  0.73           C  
ATOM   4650  CD2 LEU A 591     -33.492   7.660  12.658  1.00  0.73           C  
ATOM   4651  N   SER A 592     -31.411   9.282   8.211  1.00  0.78           N  
ATOM   4652  CA  SER A 592     -30.479   9.686   7.163  1.00  0.78           C  
ATOM   4653  C   SER A 592     -29.530  10.706   7.742  1.00  0.78           C  
ATOM   4654  O   SER A 592     -29.943  11.801   8.102  1.00  0.78           O  
ATOM   4655  CB  SER A 592     -31.186  10.327   5.947  1.00  0.78           C  
ATOM   4656  OG  SER A 592     -30.302  10.529   4.840  1.00  0.78           O  
ATOM   4657  N   ILE A 593     -28.233  10.384   7.895  1.00  0.71           N  
ATOM   4658  CA  ILE A 593     -27.333  11.256   8.646  1.00  0.71           C  
ATOM   4659  C   ILE A 593     -26.134  11.704   7.837  1.00  0.71           C  
ATOM   4660  O   ILE A 593     -25.468  10.903   7.188  1.00  0.71           O  
ATOM   4661  CB  ILE A 593     -26.796  10.614   9.923  1.00  0.71           C  
ATOM   4662  CG1 ILE A 593     -27.907  10.000  10.808  1.00  0.71           C  
ATOM   4663  CG2 ILE A 593     -25.994  11.690  10.700  1.00  0.71           C  
ATOM   4664  CD1 ILE A 593     -28.110   8.492  10.643  1.00  0.71           C  
ATOM   4665  N   THR A 594     -25.766  13.000   7.888  1.00  0.67           N  
ATOM   4666  CA  THR A 594     -24.432  13.443   7.487  1.00  0.67           C  
ATOM   4667  C   THR A 594     -23.452  13.190   8.639  1.00  0.67           C  
ATOM   4668  O   THR A 594     -23.563  13.759   9.720  1.00  0.67           O  
ATOM   4669  CB  THR A 594     -24.372  14.898   7.008  1.00  0.67           C  
ATOM   4670  OG1 THR A 594     -24.385  15.818   8.082  1.00  0.67           O  
ATOM   4671  CG2 THR A 594     -25.600  15.201   6.128  1.00  0.67           C  
ATOM   4672  N   HIS A 595     -22.464  12.278   8.484  1.00  0.59           N  
ATOM   4673  CA  HIS A 595     -21.663  11.887   9.646  1.00  0.59           C  
ATOM   4674  C   HIS A 595     -20.216  12.275   9.586  1.00  0.59           C  
ATOM   4675  O   HIS A 595     -19.491  12.064   8.616  1.00  0.59           O  
ATOM   4676  CB  HIS A 595     -21.684  10.383   9.998  1.00  0.59           C  
ATOM   4677  CG  HIS A 595     -22.767  10.045  10.953  1.00  0.59           C  
ATOM   4678  ND1 HIS A 595     -22.824  10.715  12.158  1.00  0.59           N  
ATOM   4679  CD2 HIS A 595     -23.799   9.183  10.838  1.00  0.59           C  
ATOM   4680  CE1 HIS A 595     -23.912  10.255  12.746  1.00  0.59           C  
ATOM   4681  NE2 HIS A 595     -24.538   9.321  11.989  1.00  0.59           N  
ATOM   4682  N   ARG A 596     -19.740  12.797  10.725  1.00  0.50           N  
ATOM   4683  CA  ARG A 596     -18.352  13.102  10.969  1.00  0.50           C  
ATOM   4684  C   ARG A 596     -17.765  12.235  12.087  1.00  0.50           C  
ATOM   4685  O   ARG A 596     -16.707  11.672  11.813  1.00  0.50           O  
ATOM   4686  CB  ARG A 596     -18.182  14.619  11.222  1.00  0.50           C  
ATOM   4687  CG  ARG A 596     -18.809  15.491  10.108  1.00  0.50           C  
ATOM   4688  CD  ARG A 596     -18.144  15.360   8.733  1.00  0.50           C  
ATOM   4689  NE  ARG A 596     -18.976  16.170   7.781  1.00  0.50           N  
ATOM   4690  CZ  ARG A 596     -19.728  15.675   6.784  1.00  0.50           C  
ATOM   4691  NH1 ARG A 596     -20.368  16.524   5.978  1.00  0.50           N  
ATOM   4692  NH2 ARG A 596     -19.863  14.369   6.580  1.00  0.50           N  
ATOM   4693  N   PRO A 597     -18.342  11.972  13.274  1.00  0.55           N  
ATOM   4694  CA  PRO A 597     -17.866  10.941  14.203  1.00  0.55           C  
ATOM   4695  C   PRO A 597     -17.659   9.559  13.619  1.00  0.55           C  
ATOM   4696  O   PRO A 597     -18.386   9.150  12.710  1.00  0.55           O  
ATOM   4697  CB  PRO A 597     -18.917  10.912  15.325  1.00  0.55           C  
ATOM   4698  CG  PRO A 597     -19.493  12.326  15.308  1.00  0.55           C  
ATOM   4699  CD  PRO A 597     -19.513  12.659  13.820  1.00  0.55           C  
ATOM   4700  N   SER A 598     -16.666   8.812  14.128  1.00  0.53           N  
ATOM   4701  CA  SER A 598     -16.492   7.400  13.844  1.00  0.53           C  
ATOM   4702  C   SER A 598     -17.590   6.540  14.445  1.00  0.53           C  
ATOM   4703  O   SER A 598     -18.143   5.670  13.780  1.00  0.53           O  
ATOM   4704  CB  SER A 598     -15.111   6.889  14.331  1.00  0.53           C  
ATOM   4705  OG  SER A 598     -14.887   7.254  15.694  1.00  0.53           O  
ATOM   4706  N   LEU A 599     -17.970   6.801  15.709  1.00  0.53           N  
ATOM   4707  CA  LEU A 599     -18.864   5.960  16.483  1.00  0.53           C  
ATOM   4708  C   LEU A 599     -20.230   5.712  15.871  1.00  0.53           C  
ATOM   4709  O   LEU A 599     -20.725   4.596  15.863  1.00  0.53           O  
ATOM   4710  CB  LEU A 599     -19.025   6.521  17.911  1.00  0.53           C  
ATOM   4711  CG  LEU A 599     -17.704   6.574  18.707  1.00  0.53           C  
ATOM   4712  CD1 LEU A 599     -17.948   7.246  20.061  1.00  0.53           C  
ATOM   4713  CD2 LEU A 599     -17.074   5.189  18.932  1.00  0.53           C  
ATOM   4714  N   TRP A 600     -20.876   6.724  15.277  1.00  0.53           N  
ATOM   4715  CA  TRP A 600     -22.127   6.483  14.592  1.00  0.53           C  
ATOM   4716  C   TRP A 600     -22.026   5.560  13.383  1.00  0.53           C  
ATOM   4717  O   TRP A 600     -22.853   4.676  13.190  1.00  0.53           O  
ATOM   4718  CB  TRP A 600     -22.705   7.817  14.114  1.00  0.53           C  
ATOM   4719  CG  TRP A 600     -23.441   8.585  15.189  1.00  0.53           C  
ATOM   4720  CD1 TRP A 600     -22.998   9.546  16.051  1.00  0.53           C  
ATOM   4721  CD2 TRP A 600     -24.818   8.340  15.518  1.00  0.53           C  
ATOM   4722  NE1 TRP A 600     -24.000   9.886  16.932  1.00  0.53           N  
ATOM   4723  CE2 TRP A 600     -25.119   9.144  16.635  1.00  0.53           C  
ATOM   4724  CE3 TRP A 600     -25.765   7.473  14.976  1.00  0.53           C  
ATOM   4725  CZ2 TRP A 600     -26.358   9.065  17.252  1.00  0.53           C  
ATOM   4726  CZ3 TRP A 600     -27.024   7.410  15.590  1.00  0.53           C  
ATOM   4727  CH2 TRP A 600     -27.315   8.193  16.717  1.00  0.53           C  
ATOM   4728  N   LYS A 601     -20.984   5.734  12.549  1.00  0.55           N  
ATOM   4729  CA  LYS A 601     -20.880   5.097  11.250  1.00  0.55           C  
ATOM   4730  C   LYS A 601     -20.571   3.601  11.324  1.00  0.55           C  
ATOM   4731  O   LYS A 601     -20.680   2.898  10.325  1.00  0.55           O  
ATOM   4732  CB  LYS A 601     -19.785   5.780  10.386  1.00  0.55           C  
ATOM   4733  CG  LYS A 601     -20.074   7.213   9.910  1.00  0.55           C  
ATOM   4734  CD  LYS A 601     -19.020   7.726   8.900  1.00  0.55           C  
ATOM   4735  CE  LYS A 601     -17.648   8.147   9.450  1.00  0.55           C  
ATOM   4736  NZ  LYS A 601     -17.730   9.476  10.083  1.00  0.55           N  
ATOM   4737  N   TYR A 602     -20.172   3.052  12.498  1.00  0.36           N  
ATOM   4738  CA  TYR A 602     -20.055   1.605  12.642  1.00  0.36           C  
ATOM   4739  C   TYR A 602     -21.390   0.881  12.753  1.00  0.36           C  
ATOM   4740  O   TYR A 602     -21.477  -0.286  12.387  1.00  0.36           O  
ATOM   4741  CB  TYR A 602     -19.068   1.143  13.772  1.00  0.36           C  
ATOM   4742  CG  TYR A 602     -19.549   1.241  15.202  1.00  0.36           C  
ATOM   4743  CD1 TYR A 602     -20.509   0.348  15.719  1.00  0.36           C  
ATOM   4744  CD2 TYR A 602     -18.990   2.194  16.069  1.00  0.36           C  
ATOM   4745  CE1 TYR A 602     -20.981   0.482  17.031  1.00  0.36           C  
ATOM   4746  CE2 TYR A 602     -19.461   2.329  17.385  1.00  0.36           C  
ATOM   4747  CZ  TYR A 602     -20.478   1.491  17.853  1.00  0.36           C  
ATOM   4748  OH  TYR A 602     -21.019   1.667  19.141  1.00  0.36           O  
ATOM   4749  N   HIS A 603     -22.434   1.567  13.265  1.00  0.46           N  
ATOM   4750  CA  HIS A 603     -23.666   0.974  13.773  1.00  0.46           C  
ATOM   4751  C   HIS A 603     -24.796   1.028  12.754  1.00  0.46           C  
ATOM   4752  O   HIS A 603     -25.938   0.645  12.997  1.00  0.46           O  
ATOM   4753  CB  HIS A 603     -24.074   1.795  15.022  1.00  0.46           C  
ATOM   4754  CG  HIS A 603     -25.380   1.446  15.662  1.00  0.46           C  
ATOM   4755  ND1 HIS A 603     -25.585   0.199  16.217  1.00  0.46           N  
ATOM   4756  CD2 HIS A 603     -26.477   2.226  15.833  1.00  0.46           C  
ATOM   4757  CE1 HIS A 603     -26.800   0.246  16.717  1.00  0.46           C  
ATOM   4758  NE2 HIS A 603     -27.388   1.450  16.514  1.00  0.46           N  
ATOM   4759  N   THR A 604     -24.506   1.513  11.544  1.00  0.58           N  
ATOM   4760  CA  THR A 604     -25.522   1.924  10.592  1.00  0.58           C  
ATOM   4761  C   THR A 604     -25.648   0.953   9.447  1.00  0.58           C  
ATOM   4762  O   THR A 604     -24.659   0.552   8.840  1.00  0.58           O  
ATOM   4763  CB  THR A 604     -25.203   3.296  10.039  1.00  0.58           C  
ATOM   4764  OG1 THR A 604     -23.852   3.378   9.607  1.00  0.58           O  
ATOM   4765  CG2 THR A 604     -25.341   4.294  11.196  1.00  0.58           C  
ATOM   4766  N   HIS A 605     -26.896   0.554   9.124  1.00  0.51           N  
ATOM   4767  CA  HIS A 605     -27.242  -0.536   8.225  1.00  0.51           C  
ATOM   4768  C   HIS A 605     -26.672  -0.444   6.829  1.00  0.51           C  
ATOM   4769  O   HIS A 605     -26.261  -1.446   6.251  1.00  0.51           O  
ATOM   4770  CB  HIS A 605     -28.776  -0.621   8.044  1.00  0.51           C  
ATOM   4771  CG  HIS A 605     -29.536  -0.824   9.314  1.00  0.51           C  
ATOM   4772  ND1 HIS A 605     -29.649   0.218  10.217  1.00  0.51           N  
ATOM   4773  CD2 HIS A 605     -30.220  -1.909   9.758  1.00  0.51           C  
ATOM   4774  CE1 HIS A 605     -30.402  -0.256  11.189  1.00  0.51           C  
ATOM   4775  NE2 HIS A 605     -30.777  -1.536  10.962  1.00  0.51           N  
ATOM   4776  N   LEU A 606     -26.640   0.763   6.253  1.00  0.54           N  
ATOM   4777  CA  LEU A 606     -26.065   0.980   4.953  1.00  0.54           C  
ATOM   4778  C   LEU A 606     -25.479   2.374   5.006  1.00  0.54           C  
ATOM   4779  O   LEU A 606     -25.917   3.225   5.775  1.00  0.54           O  
ATOM   4780  CB  LEU A 606     -27.124   0.769   3.834  1.00  0.54           C  
ATOM   4781  CG  LEU A 606     -26.607   0.922   2.389  1.00  0.54           C  
ATOM   4782  CD1 LEU A 606     -27.072  -0.220   1.475  1.00  0.54           C  
ATOM   4783  CD2 LEU A 606     -27.020   2.263   1.785  1.00  0.54           C  
ATOM   4784  N   LEU A 607     -24.421   2.641   4.237  1.00  0.56           N  
ATOM   4785  CA  LEU A 607     -23.773   3.926   4.200  1.00  0.56           C  
ATOM   4786  C   LEU A 607     -23.621   4.237   2.734  1.00  0.56           C  
ATOM   4787  O   LEU A 607     -23.908   3.389   1.890  1.00  0.56           O  
ATOM   4788  CB  LEU A 607     -22.414   3.955   4.940  1.00  0.56           C  
ATOM   4789  CG  LEU A 607     -22.514   3.697   6.460  1.00  0.56           C  
ATOM   4790  CD1 LEU A 607     -22.352   2.218   6.853  1.00  0.56           C  
ATOM   4791  CD2 LEU A 607     -21.505   4.541   7.252  1.00  0.56           C  
ATOM   4792  N   GLN A 608     -23.310   5.498   2.396  1.00  0.58           N  
ATOM   4793  CA  GLN A 608     -23.234   5.930   1.023  1.00  0.58           C  
ATOM   4794  C   GLN A 608     -22.132   6.993   0.943  1.00  0.58           C  
ATOM   4795  O   GLN A 608     -22.062   7.901   1.778  1.00  0.58           O  
ATOM   4796  CB  GLN A 608     -24.623   6.498   0.556  1.00  0.58           C  
ATOM   4797  CG  GLN A 608     -25.812   5.507   0.712  1.00  0.58           C  
ATOM   4798  CD  GLN A 608     -27.229   6.057   0.521  1.00  0.58           C  
ATOM   4799  OE1 GLN A 608     -27.604   7.145   0.963  1.00  0.58           O  
ATOM   4800  NE2 GLN A 608     -28.112   5.217  -0.064  1.00  0.58           N  
ATOM   4801  N   PHE A 609     -21.241   6.934  -0.074  1.00  0.49           N  
ATOM   4802  CA  PHE A 609     -20.168   7.910  -0.259  1.00  0.49           C  
ATOM   4803  C   PHE A 609     -20.429   8.784  -1.485  1.00  0.49           C  
ATOM   4804  O   PHE A 609     -20.504   8.306  -2.618  1.00  0.49           O  
ATOM   4805  CB  PHE A 609     -18.771   7.232  -0.383  1.00  0.49           C  
ATOM   4806  CG  PHE A 609     -17.649   8.248  -0.450  1.00  0.49           C  
ATOM   4807  CD1 PHE A 609     -17.114   8.810   0.720  1.00  0.49           C  
ATOM   4808  CD2 PHE A 609     -17.168   8.692  -1.695  1.00  0.49           C  
ATOM   4809  CE1 PHE A 609     -16.124   9.800   0.649  1.00  0.49           C  
ATOM   4810  CE2 PHE A 609     -16.187   9.688  -1.772  1.00  0.49           C  
ATOM   4811  CZ  PHE A 609     -15.664  10.242  -0.598  1.00  0.49           C  
ATOM   4812  N   ASP A 610     -20.550  10.108  -1.271  1.00  0.61           N  
ATOM   4813  CA  ASP A 610     -20.780  11.112  -2.291  1.00  0.61           C  
ATOM   4814  C   ASP A 610     -19.444  11.744  -2.670  1.00  0.61           C  
ATOM   4815  O   ASP A 610     -18.567  12.022  -1.851  1.00  0.61           O  
ATOM   4816  CB  ASP A 610     -21.836  12.144  -1.787  1.00  0.61           C  
ATOM   4817  CG  ASP A 610     -22.207  13.280  -2.738  1.00  0.61           C  
ATOM   4818  OD1 ASP A 610     -21.694  13.349  -3.884  1.00  0.61           O  
ATOM   4819  OD2 ASP A 610     -23.039  14.107  -2.294  1.00  0.61           O  
ATOM   4820  N   GLY A 611     -19.242  11.983  -3.970  1.00  0.62           N  
ATOM   4821  CA  GLY A 611     -18.129  12.776  -4.433  1.00  0.62           C  
ATOM   4822  C   GLY A 611     -18.537  13.461  -5.691  1.00  0.62           C  
ATOM   4823  O   GLY A 611     -18.839  12.798  -6.675  1.00  0.62           O  
ATOM   4824  N   GLU A 612     -18.551  14.808  -5.675  1.00  0.58           N  
ATOM   4825  CA  GLU A 612     -18.848  15.646  -6.829  1.00  0.58           C  
ATOM   4826  C   GLU A 612     -20.336  15.660  -7.165  1.00  0.58           C  
ATOM   4827  O   GLU A 612     -20.748  15.928  -8.293  1.00  0.58           O  
ATOM   4828  CB  GLU A 612     -17.931  15.364  -8.055  1.00  0.58           C  
ATOM   4829  CG  GLU A 612     -16.433  15.640  -7.764  1.00  0.58           C  
ATOM   4830  CD  GLU A 612     -15.508  14.920  -8.738  1.00  0.58           C  
ATOM   4831  OE1 GLU A 612     -15.446  13.663  -8.647  1.00  0.58           O  
ATOM   4832  OE2 GLU A 612     -14.819  15.598  -9.531  1.00  0.58           O  
ATOM   4833  N   GLY A 613     -21.201  15.416  -6.152  1.00  0.67           N  
ATOM   4834  CA  GLY A 613     -22.644  15.466  -6.316  1.00  0.67           C  
ATOM   4835  C   GLY A 613     -23.227  14.177  -6.818  1.00  0.67           C  
ATOM   4836  O   GLY A 613     -24.346  14.143  -7.325  1.00  0.67           O  
ATOM   4837  N   GLY A 614     -22.496  13.065  -6.692  1.00  0.67           N  
ATOM   4838  CA  GLY A 614     -22.943  11.757  -7.128  1.00  0.67           C  
ATOM   4839  C   GLY A 614     -22.397  10.708  -6.210  1.00  0.67           C  
ATOM   4840  O   GLY A 614     -21.227  10.725  -5.835  1.00  0.67           O  
ATOM   4841  N   TRP A 615     -23.233   9.723  -5.834  1.00  0.58           N  
ATOM   4842  CA  TRP A 615     -22.804   8.603  -5.019  1.00  0.58           C  
ATOM   4843  C   TRP A 615     -21.880   7.681  -5.791  1.00  0.58           C  
ATOM   4844  O   TRP A 615     -22.248   7.101  -6.810  1.00  0.58           O  
ATOM   4845  CB  TRP A 615     -23.994   7.808  -4.430  1.00  0.58           C  
ATOM   4846  CG  TRP A 615     -24.971   8.711  -3.738  1.00  0.58           C  
ATOM   4847  CD1 TRP A 615     -26.086   9.295  -4.252  1.00  0.58           C  
ATOM   4848  CD2 TRP A 615     -24.835   9.275  -2.408  1.00  0.58           C  
ATOM   4849  NE1 TRP A 615     -26.658  10.174  -3.361  1.00  0.58           N  
ATOM   4850  CE2 TRP A 615     -25.867  10.155  -2.225  1.00  0.58           C  
ATOM   4851  CE3 TRP A 615     -23.865   9.059  -1.431  1.00  0.58           C  
ATOM   4852  CZ2 TRP A 615     -26.015  10.894  -1.049  1.00  0.58           C  
ATOM   4853  CZ3 TRP A 615     -24.022   9.762  -0.217  1.00  0.58           C  
ATOM   4854  CH2 TRP A 615     -25.082  10.651  -0.032  1.00  0.58           C  
ATOM   4855  N   LYS A 616     -20.629   7.550  -5.326  1.00  0.58           N  
ATOM   4856  CA  LYS A 616     -19.616   6.779  -6.015  1.00  0.58           C  
ATOM   4857  C   LYS A 616     -19.483   5.403  -5.412  1.00  0.58           C
[truncated: 428,417 more chars]
